# Supplementary material
Source: Research Square preprint supplement (doi:10.21203/rs.3.rs-10129888/v1)
Supplement: Supplementary file 1 [file 97e9cf9206983aa904a82007.pdf]

## SUPPLEMENTARY INFORMATION

|                                                                                                                                                                                                                                                                                 |                  |
|---------------------------------------------------------------------------------------------------------------------------------------------------------------------------------------------------------------------------------------------------------------------------------|------------------|
| <b>SUPPLEMENTARY MATERIALS AND METHODS .....</b>                                                                                                                                                                                                                                | <b>4</b>         |
| <b>Animals .....</b>                                                                                                                                                                                                                                                            | <b>4</b>         |
| <b>Composition and sequencing of Neo<sup>+</sup> Arc/Arg3.1 KO1 construct.....</b>                                                                                                                                                                                              | <b>4</b>         |
| <b>Generation of Neo<sup>-</sup> Arc/Arg3.1 KO1 mouse line .....</b>                                                                                                                                                                                                            | <b>6</b>         |
| <b>Behavior experiments .....</b>                                                                                                                                                                                                                                               | <b>7</b>         |
| <i>Maternal behavior .....</i>                                                                                                                                                                                                                                                  | <i>8</i>         |
| <i>Evaluation of nesting quality .....</i>                                                                                                                                                                                                                                      | <i>9</i>         |
| In a clean home cage of the experimental dams, two cotton pads were placed on the opposite side of the cage from the carton shelter in the afternoon. The next morning, the nest was observed, and nesting quality was ranked according to the criteria published in (2). ..... | <i>9</i>         |
| <i>Pup retrieval test.....</i>                                                                                                                                                                                                                                                  | <i>9</i>         |
| <i>Social interactions.....</i>                                                                                                                                                                                                                                                 | <i>10</i>        |
| <i>Social recognition test.....</i>                                                                                                                                                                                                                                             | <i>11</i>        |
| <b><i>Social dominance and aggression .....</i></b>                                                                                                                                                                                                                             | <b><i>11</i></b> |
| Dominance tube test .....                                                                                                                                                                                                                                                       | 11               |
| <b><i>Stereotyped and compulsive behavior .....</i></b>                                                                                                                                                                                                                         | <b><i>12</i></b> |
| <i>Motor stereotypies test.....</i>                                                                                                                                                                                                                                             | <i>12</i>        |
| <i>Marble-burying test .....</i>                                                                                                                                                                                                                                                | <i>12</i>        |
| <i>Spatial Y-maze test .....</i>                                                                                                                                                                                                                                                | <i>13</i>        |
| <b><i>Anxious-like behavior .....</i></b>                                                                                                                                                                                                                                       | <b><i>13</i></b> |
| <i>Open-field test .....</i>                                                                                                                                                                                                                                                    | <i>13</i>        |
| <i>Novelty-suppressed feeding test.....</i>                                                                                                                                                                                                                                     | <i>14</i>        |
| <i>Elevated plus maze test .....</i>                                                                                                                                                                                                                                            | <i>14</i>        |
| <b><i>Motor coordination .....</i></b>                                                                                                                                                                                                                                          | <b><i>14</i></b> |
| <i>String test.....</i>                                                                                                                                                                                                                                                         | <i>14</i>        |
| <b><i>Olfaction .....</i></b>                                                                                                                                                                                                                                                   | <b><i>15</i></b> |
| <i>Olfactory habituation/dishabituation test.....</i>                                                                                                                                                                                                                           | <i>15</i>        |
| <i>Food localization test .....</i>                                                                                                                                                                                                                                             | <i>15</i>        |
| <i>Innate olfactory test.....</i>                                                                                                                                                                                                                                               | <i>16</i>        |
| <i>Olfactory avoidance test .....</i>                                                                                                                                                                                                                                           | <i>16</i>        |
| <b><i>Memory .....</i></b>                                                                                                                                                                                                                                                      | <b><i>16</i></b> |
| <i>Spatial object location recognition test .....</i>                                                                                                                                                                                                                           | <i>17</i>        |
| <i>Novel object recognition test .....</i>                                                                                                                                                                                                                                      | <i>17</i>        |
| <i>Spatial Y-maze memory test .....</i>                                                                                                                                                                                                                                         | <i>18</i>        |
| <b><i>Pup testing .....</i></b>                                                                                                                                                                                                                                                 | <b><i>18</i></b> |
| <i>Recording pups' ultrasound vocalizations (USVs) .....</i>                                                                                                                                                                                                                    | <i>18</i>        |
| <i>Homing test .....</i>                                                                                                                                                                                                                                                        | <i>19</i>        |
| <i>Grasping reflex test.....</i>                                                                                                                                                                                                                                                | <i>19</i>        |
| <i>Righting reflex test.....</i>                                                                                                                                                                                                                                                | <i>19</i>        |
| <i>Cliff avoidance test .....</i>                                                                                                                                                                                                                                               | <i>19</i>        |
| <i>Scoring .....</i>                                                                                                                                                                                                                                                            | <i>20</i>        |
| <b>Quantitative PCR (qPCR).....</b>                                                                                                                                                                                                                                             | <b>20</b>        |

|                                                                                                                                                                                |           |
|--------------------------------------------------------------------------------------------------------------------------------------------------------------------------------|-----------|
| Library Preparation and NovaSeq sequencing.....                                                                                                                                | 21        |
| <i>Arc/Arg3.1</i> genomic environment exploration .....                                                                                                                        | 24        |
| Western blot .....                                                                                                                                                             | 25        |
| Immunohistochemistry .....                                                                                                                                                     | 27        |
| <i>Image acquisition and analysis</i> .....                                                                                                                                    | 29        |
| Chronic oxytocin treatment.....                                                                                                                                                | 31        |
| Statistical analysis .....                                                                                                                                                     | 31        |
| <b>SUPPLEMENTARY FIGURES .....</b>                                                                                                                                             | <b>33</b> |
| Figure S1. <i>Arc/Arg3.1</i> gene, Neomycin cassette and KO1 construct.....                                                                                                    | 33        |
| Figure S2. Neo <sup>+</sup> <i>Arc/Arg3.1</i> -deficient dams display maternal care impairments .....                                                                          | 34        |
| Figure S3. Social interaction impairments are more pronounced in Neo <sup>+</sup> <i>Arc/Arg3.1</i> KO1 females than males .....                                               | 35        |
| Figure S4. Neo <sup>+</sup> <i>Arc/Arg3.1</i> KO1 mice display social deficits, rather than social memory impairments .....                                                    | 37        |
| Figure S5. Neo <sup>+</sup> <i>Arc/Arg3.1</i> KO1 mice display olfactory impairments only with social odors .....                                                              | 38        |
| Figure S6. Neo <sup>+</sup> <i>Arc/Arg3.1</i> KO1 pups exhibit social communication impairments, but not motor impairments.....                                                | 40        |
| Figure S7. Neo <sup>+</sup> <i>Arc/Arg3.1</i> KO1 mice display mild spatial short-term memory impairments which are absent in Neo <sup>-</sup> <i>Arc/Arg3.1</i> KO1 mice..... | 41        |
| Figure S8. Social behavior impairments of Neo <sup>+</sup> <i>Arc/Arg3.1</i> KO1 are not due to anxious-like behavior or motor impairments .....                               | 42        |
| Figure S9. Neo protein product is not detected in other brain structures .....                                                                                                 | 43        |
| Figure S10. Neomycin cassette does not affect the number of oxytocinergic neurons in the PVN and SON.....                                                                      | 44        |
| Figure S11. Neomycin cassette enhances ERK1/2 signaling in HEK293 cells, but not in Neo <sup>+</sup> <i>Arc/Arg3.1</i> KO1 males or olfactory bulb .....                       | 45        |
| Figure S12. Integration of neomycin-induced maternal and social interaction impairments in Neo <sup>+</sup> <i>Arc/Arg3.1</i> KO1 mice to gene dysregulation .....             | 46        |
| Figure S13. Effect of <i>Arc/Arg3.1</i> deletion on gene expression .....                                                                                                      | 48        |
| Figure S14. Subchronic oxytocin administration does not improve social interaction impairments, stereotyped or anxious-like behaviors.....                                     | 49        |
| Figure S15. Neo <sup>+</sup> <i>Arc/Arg3.1</i> KO1 mice raised in an enriched social environment display increased social interaction.....                                     | 50        |
| <b>SUPPLEMENTARY TABLES .....</b>                                                                                                                                              | <b>51</b> |
| Table S1. Mean and statistics from behavior tests in adult mice .....                                                                                                          | 52        |
| Table S2. Mean and statistics from the social interaction in the Live Mouse Tracker.....                                                                                       | 68        |
| Table S3. Mean and statistics from behavior tests in pups .....                                                                                                                | 77        |

|                                                                                                    |           |
|----------------------------------------------------------------------------------------------------|-----------|
| Table S4. Mean and statistics from western blot data in the PVN of naïve mice and HEK293 cells ... | 79        |
| Table S5. Mean and statistics from qPCR data in dams and naïve mice .....                          | 81        |
| Table S6. List of all primers used for genotyping and qPCR .....                                   | 87        |
| Table S7. List of genes dysregulated identified by RNA sequencing.....                             | 88        |
| <b>SUPPLEMENTARY REFERENCES .....</b>                                                              | <b>90</b> |

## SUPPLEMENTARY MATERIALS AND METHODS

### Animals

All mice used in this study were raised in conventional type 2 cages with the same bedding and enrichment material (carton house and nesting material) in a dedicated breeding room with controlled temperature (21°C) and humidity (50%) under a 12-hour light/dark regular cycle with light on from 7 am till 7 pm for mice for Neo<sup>+</sup> and Neo<sup>-</sup> *Arc/Arg3.1* KO1 lines and from 8 pm till 8 am for mice for Neo<sup>-</sup> *Arc/Arg3.1* KO2 line. All the experimental mice were placed in the same breeding room of the animal facility. KO1 mice were raised in conventional health housing status, exempt from any monitored viral, bacterial, mycoplasma, fungi, parasites, or pathological lesions, except detected mouse Norovirus and *Helicobacter* spp. All Neo<sup>+</sup> and Neo<sup>-</sup> *Arc/Arg3.1* KO1 mice were bred on a mixed 50% C57BL/6J – 50% 129S2 background (Charles River, France), while Neo<sup>-</sup> *Arc/Arg3.1* KO2 mice were bred on a pure C57BL/6J background. Following the heterozygous breeding scheme, independent cohorts were generated from a minimum of three different homozygous non-inbred couples. All experimental mice were sexually naïve and between 7 and 9 weeks of age (2 months) when starting the experiments, while maternal behavior was tested in 3- to 4-month-old females, once they had reached optimal reproductivity.

### *Composition and sequencing of Neo<sup>+</sup> Arc/Arg3.1 KO1 construct*

Using PCR with different couples of primers (primer sequences in [Table S6](#)), we validated the genotype, length and order of the genomic components of the Neo<sup>+</sup> *Arc/Arg3.1* KO1 mice construct: d2EGFP (Fg com & Rg mut KO genotyping primers), Neomycin (F Neo & R Neo

Neomycin genotyping primers) and *Arc/Arg3.1* coding sequence (F Neo & R1 and Fg com & Rg WT genotyping primers). Interestingly, while the first intron length was similar to the reference genome (Fq2 & Rq2 primers), the second intron was longer than expected (band around 2000 bp vs. 187 bp in the reference genome, using Fq1 & Rq1 primers). Using Sanger sequencing on F Neo & Rq2-amplified genomic DNA, we determined the Neo<sup>+</sup> *Arc/Arg3.1* KO1 genome sequence between the Neomycin cassette and exon2:

```
GGCAATACATGCAATCGGCTGCTCTGATGCCGCCGTGTTCCGGCTGTCAGCGCAGGGGCGCCCGTTCT
TTTTGTCAAGACCGACCTGTCCGGTGCCCTGAATGAAGTGCAGGACGAGGCAGCGCGGCTATCGTGGCT
GGCCACGACGGGCGTTCCTTGCGCAGCTGTGCTCGACGTTGCTACTGAAGCGGGAAGGGACTGGCTGCT
ATTGGGCGAAGTGCCGGGGCAGGATCTCCTGTATCTCACCTTGCTCCTGCCGAGAAGTATCCATCATGG
CTGATGCAATGCGGCGGCTGCATACGCTTGATCCGGCTACCTGCCATTGACCACCAAGCGAAACATCG
CATCGAGCGAGCACGTACTCGGATGGAAGCCGGTCTTGTCGATCAGGATGATCTGGACGAAGAGCATCA
GGGGCTCGCGCCAGCCGAAGTGTTCGCCAGGCTCAAGGCGCGCATGCCCGACGGCGATGATCTCGTCGT
GACCCATGGCGATGCCTGCTTGCCGAATATCATGGTGGAAAATGGCCGCTTTTCTGGATTCATCGACTGT
GGCCGGCTGGGTGTGGCGGACCGCTATCAGGACATAGCGTTGGCTACCCGTGATATTGCTGAAGAGCTT
GGCGGCGAATGGGCTGACCGCTTCTCGTGCTTTACGGTATCGCCGCTCCCGATTGCGAGCGCATCGCCT
TCTATCGCCTTCTTGACGAGTTCTTCTGAggggatcaattctctagagctcgtgatcagcctcgactgtgccttctagttgcca
gcatctgttgtttgccctccccctgcttcttgaccctggaaggtgccactcccactgtcctttcctaataaaaatgaggaaattgcatcg
cattgtctgagtaggtgtcattctattctgggggggtgggggtggggcaggaagcaagggggaggaattgggaagacaatagcaggcatgc
tggggatgcggtgggctctaggcttctgaggcggaagaaccagctggggctcgaatcaagctgatccggaacccttaataATAAC
TTCGTATAatgtatgcTATACGAAGTTATtaggtccctcgacctgcagcccaagctaggCCGCGGGGTGGGCCGGCC
GCCAAACCAATGTGATCCTGCAGATTGGTAAGTGCCGAGCTGAGATGCTGGAACACGTACGGAGGA
CCCACCGCATCTGTTGACCGAAGTGTCCAAGCAGGTGGAGCGAGAGCTGAAAGGGTTGCACAGGTC
GGTGGGCAAGCTGGAGAACAAGTGGGACGGCTACGTGCCACCGGCGACTCACAGCGCTGGAAGAA
GTCCATCAAGGCCTGTCTTTGCCGCTGCCAGGAGACCATCGCCAACCTGGAGCGCTGGGTCAAGCGTG
AGATGCACGTGTGGAGGGAGGTCTTCTACCGTCTGGAGAGGTGGGCTGACCGCTGGAGTCCATGGG
GGCAAATACCCAGTGGGACGAGCCGGCCCGCCCACTGTCTCTGTAGGTGTGGGGGGTCCAGAGC
CCTACTGCCAGGAAGCTGATGGCTATGACTATAACGTTAGCCCCTATGCCATAACCCGCCACCTGCCGC
AGGAGAAGTGCCTGAACAGGAGTCAGTTGAGGCTCAGCAATATCAGTCTTGGGGGCCAGGTGAGGAT
GGGCAACCGAGCCCTGGTGTGGATACACAGATCTTCGAGGACCCACGGGAGTTCCTGAGCCACCTGGA
AGAGTACCTGCGGCAGGTGGGTGGCTCTGAAGAATATTGGCTGTCCAGATCCAGAACCACATGAATG
GGCCAGCCAAGAAGTGGTGGGAGTTCAAGCAGGGCTCGGTGAAGAAGTGGGTGGAGTTCAAGAAGG
AGTTTCTGCAATACAGTGAGGGTACACTCTCCCGTGAAGCCATTGAGCGGGAGCTGGAGCTGCCGAG
AAGCAGGGTGAACCACTCGACCAGTTCCTCTGGCGCAAGCGGGACCTGTACCAGACACTGTATGTGA
CGCTGAGGAGGAGGAGATCATTAGTATGTGGTGGGCACCCTGCAGCCCAAAGTCAAGCGCTTTCTGC
GCCACCACTCCCAAGACCCTGGAGCAGCTTATCCAGAGGGGTATGGAAGTGCAGGACGGCCTGGA
GCAGGCAGCTGAGCCTTCTGGCACCCCACTGCCACAGAGGATGAGACGGAGGCACTCACACCTGCTC
TTACCAGCGAGTCAGTAGCCAGTGACAGGACCCAGCCTGAATAGAGGGGCCAGCCAGGGTCCCCAGC
```

CCGCCTGCCACCCCAGCCTGTGGCTTTTGCCAACTAGGACTTGAGCTGGGGCTGACTCCCAAAGGGATGC  
CCTGTCCGCCAGACATCTACTCACCCACTGACCTGGCCTGACTCACAACTGCCACACAACCATGCTACATG  
GACGAACATCAAGAAGCCCCTTTCCCATAGGGCTCCCACCTGCCGCCTACCCCTCATCTGTCTGCCCTGGC  
CTGGCCCCCAGCCCCATTGGCCTCACCTCTACACTCTCAGACCATCACAGAACACGATCTGGCTTCTCAT  
TCTGCTCCAGTGTCCAGGGCTCTTTGGGTAATCAAGAAACCAAGTGTCTGAAAGGCAACAAAAGTAGGC  
CCCAAACCCCCGGGGGCATTCTAGGGCAAATGGTAAAACAGAGATGCTGAGGGAACCTAAATTTTCGGG  
GAAGCAACCCCCTTCTGCAGACCCAACAGATTCAAGTGGTACCCTAACTGCCCCCGGGCAACCGGCCCG  
TTTTGGGCAGCAAACTCCCCTCCCCGGGGGGAGGTGAAACCCCAAAGCAGTGAAACAGCAGACCTGA  
CATCCCGGCCCTCTGGCCCCCGGggagccccccccgggtttttgagggggggggggggcgctgcagaaccaagtcca  
ctttccaggagccctcaaggcttcctagcaattagttgcaagggtggagtgaagtggcatcagagtggtgtcattgtagtggcactg  
gcactcacggtccaaggacggggctgaggtggggcggttctgggggaattgctaagccagctcaccga

The Neomycin coding sequence (violet) was inserted with the bovine GH (Growth Hormone) polyadenylation sequence (grey) and spacer regions (italics) flanking the LoxP site (grey, frame) before the *Arc/Arg3.1* coding sequence (capitals, bold) deleted of 48bp as reported (1), the exon 1 3' UTR (capitals), followed by the first intron (orange). Although a predicted ORF of 456bp in the 3' end *Arc/Arg3.1* coding sequence could lead to a potential truncated *Arc/Arg3.1* protein of 151 amino acids (17.5kDa), no regulatory elements are present to allow protein translation.

### ***Generation of Neo<sup>-</sup> Arc/Arg3.1 KO1 mouse line***

Neo<sup>+</sup> *Arc/Arg3.1* KO1 mice <sup>1</sup> (JAX stock #007662) contain a neomycin (Neo) resistance cassette flanked by loxP sites within the *Arc/Arg3.1* gene locus (Neo<sup>+</sup> KO1 line; **Figure S1**). To examine the potential effects of the Neo cassette on social behavior, a new line without the Neo cassette (Neo<sup>-</sup> KO1) was generated by site-specific recombination. Neo<sup>+</sup> *Arc/Arg3.1*<sup>+/-</sup> and KO1 males were bred with transgenic females expressing Cre recombinase (Cre/Cre genotype) under the control of the aromatase promoter (Aro), which leads to Cre expression in the gonads and therefore allows recombination and germline transmission. PCR was used to confirm successful recombination in

the first generation (F1), with primers binding to the *Arc/Arg3.1* promoter and Neo cassette (**Rg mut** and **Rg WT**), shown in the figure below), and Neo cassette (**Neo3** and **Neo4**). Additional primers were used to verify the *Arc/Arg3.1* locus genotype (**Rg mut** and **Fg com**), and the presence of Cre recombinase in the genome. In the second breeding round, non-inbred  $\text{Neo}^+ \text{Arc/Arg3.1}^{+/-}$  Aro-Cre<sup>Tg/+</sup> males and females from the F1 generation were bred and resulted in Neo cassette removal from one *Arc/Arg3.1* locus.  $\text{Neo}^+ \text{Arc/Arg3.1}^{+/-}$  Aro-Cre<sup>Tg/+</sup> and  $\text{Neo}^- \text{Arc/Arg3.1}^{+/-}$  Aro-Cre<sup>Tg/+</sup> mice from the F2 generation were then bred with wild-type (WT) mice to eliminate the Cre recombinase from the genome. Finally,  $\text{Neo}^- \text{Arc/Arg3.1}^{+/-}$  mice without Cre recombinase in the genome were bred to obtain WT and  $\text{Neo}^-$  KO1 mice. Following the heterozygous breeding scheme, independent experimental cohorts were generated from a minimum of three different homozygous non-inbred couples. The primers used for genotyping are reported in **Table S6**.

## **Behavior experiments**

All behavioral tests were carried out starting at the beginning of the light phase of the cycle to avoid any circadian cycle effect on behavior. One behavioral test was performed per day in a dedicated quiet room with controlled temperature (21°C) and humidity (50%), under a dim light intensity of 15 lux (except 400 lux for motor stereotypies and 60 lux for novelty-suppressed feeding test) by using the standard behavioral equipment. All floors were covered with an aluminum foil coated with a textured, non-reflective gray epoxy neutral paint to allow normal locomotion, well-being, and reduced anxious-like behaviors. Each type of behavior was tested in at least two behavioral paradigms. The experiments were performed by trained experimenters

not blinded to the genotypes and treatments as treatment was provided per cage and genotypes were labelled on cages. In all except one cohort, maternal behavior was tested in females that had undergone other behavioral tests approximately 4 weeks before setting the breeding for maternal behavior assays. All behavior experiments were conducted in several cohorts of mice. In the three-chambered, open-field, spatial Y-maze, novelty-suppressed feeding, elevated-plus maze, and all the memory tests the videos were recorded from above using a USB black and white camera with 2.8-12 mm varifocal optic and ANY-maze software (Stoelting, Ireland). In the motor stereotypies, social recognition, pup retrieval, olfactory habituation/dishabituation, food localization, innate olfactory preference, olfactory avoidance, resident-intruder aggression, string, and homing tests the videos were recorded from the side using a Sony HD FDR-AX33 4K Camescop. In the dominance tube, marble-burying tests, nesting quality evaluation, and pup reflexes tests no videos were recorded as the scoring was done in real-time by an experienced experimenter.

### ***Maternal behavior***

Two genotype- and age-matched primiparous dams were bred with a male of the same or opposite genotype for two weeks. After that period, the males were removed, and the dams were isolated in type 2 cages with extra enrichment (including a carton shelter, standard nesting material, and two cotton pads). The litter in their home cages was not changed until the end of the pup retrieval test to minimize disturbance. Fertility parameters such as delivery latency, litter size, percentage of dead pups in the litter, and percentage of pups with milk in their stomach were measured for each dam on postnatal days (PND) 0, 1, and 2. The maternal behavior experimental design included evaluation of nesting quality approximately five days before and

five days after parturition (after the pup retrieval test), and the pup retrieval test conducted on PND 3-5.

#### *Evaluation of nesting quality*

In a clean home cage of the experimental dams, two cotton pads were placed on the opposite side of the cage from the carton shelter in the afternoon. The next morning, the nest was observed, and nesting quality was ranked according to the criteria published in <sup>2</sup>.

#### *Pup retrieval test*

On pup post-natal days (PND) 3-5, experimental dams with more than four pups in the litter were habituated in their home cages to the experimental room one to two hours before testing. After habituation, dams were briefly removed from their home cages (<1 min), and four pups from the litter were scattered on the opposite side of the cage from the nest. The dams were returned to their home cages by placing them in the nest with the remaining pups, the cage was closed with a clean grid without water or food and the behavior of the dams was recorded for 30 min. The latency of the dams to retrieve each pup to the nest, the total amount of time, number, and duration spent crouching, nesting, licking or sniffing the pups, self-grooming, digging outside the nest, and being outside the nest, as well as the latency to reach full maternal behavior (spending >1 min in the nest over the pups after all the pups have been retrieved and grouped) were measured. Retrieval was defined as a dam placing a pup into the nest. Crouching was defined as the dam being immobile in a hunched-back position over the pups in the nest, and it was scored once the pups were retrieved and grouped. Unlike other behavioral parameters that were observable throughout the 30-minute pup retrieval test, crouching behavior was not visible when dams completely enclosed their nests after pup retrieval, which was at different time for WT and

[Arc/Arg3.1 KO1 females](#). Licking or sniffing the pups was defined as the dam touching the pups with her nose or mouth and it was scored before retrieval when pups were visible outside the nest. Nesting was defined as collecting nesting material and placing it on the nest or around the nest to reduce dispersity in the cage.

### ***Social interactions***

Three-chambered test and complex social interaction in the Live Mouse Tracker (LMT) were performed as previously described <sup>3,4</sup>. Briefly, in the three-chambered test, experimental mice were subjected to four phases of 10 min separated by 5 min intervals: the habituation phase with empty grid cages, the sociability phase with unfamiliar sex- and age-matched WT interactor “mouse” versus Lego toy “object”, the social novelty phase with the “familiar” WT interactor from the sociability phase and a “novel” unfamiliar sex- and age-matched WT interactor replacing the toy, and the mate preference phase with the novel “familiar” WT interactor from the social novelty phase and a genotype-matched cage mate. The total amount of time, number, and mean duration of chamber entries, nose contacts to interactor, object or empty grid cages, the total distance traveled, self-grooming episodes, and immobility were measured.

For the complex social interaction in the LMT, up to four sex- and age-matched experimental mice were subjected to social interaction in the open field of the LMT across three consecutive trials which consisted of three interactions on separate days. The trials included interaction with up to four cage mates, followed by interaction with 2 unfamiliar WT and 2 unfamiliar [Arc KO1](#) mice, and finally, interaction with 4 genotype-matched mice. Different parameters of the social interaction were automatically scored from the SQLite database using Python scripts developed by de Chaumont *et al.* <sup>5</sup>.

## ***Social memory***

### *Social recognition test*

Experimental mice were habituated to a clean conventional type 2 cage with fresh bedding for five minutes, after which they were subjected to four testing trials of 5 min separated by one-hour or 24-hour intervals. In the first trial, each experimental mouse met an unfamiliar age- and sex-matched WT interactor. One hour later, in the second trial, the experimental mice met the same interactor from the first trial. 24 hours later, in the third trial, the experimental mice met the same interactor mouse from the first and second trials. Finally, one hour later in the fourth trial, they met another unfamiliar age- and sex-matched WT interactor. The total amount of time, the number of visits, and mean duration spent in nose contact, self-grooming, self-grooming within 5 seconds following social contact, paw contacts, attacks, following, rearing, circling, huddling episodes, and the total time immobile were measured.

## ***Social dominance and aggression***

### **Dominance tube test**

A dominance tube test adapted from Pallé *et al.*<sup>6</sup> was performed to test the inter- and intra-cage hierarchy of the experimental mice. The test consisted of five days of training and three days of testing in a conventional type 3 cage for rats using a plexiglass tube (35 cm long, 3 cm diameter) with moving transparent plexiglass gates in the middle. During the first three days of training, testing mice were placed with their cage mates for 30 minutes in a testing cage with the tube. In the remaining two training days the mice were individually placed in a testing cage with a tube and trained to cross the tube eight times, four times from each side without going back. On each testing day, each experimental mouse met an unfamiliar age-, sex-, and size-matched mouse of

the opposite genotype to determine their dominance. This type of trial was performed four times for each experimental mouse. Each pair of animals was placed at the same time at each end of the tube allowing them to meet in the middle with the tube gates closed. The trial started by opening the gates and ended when one of the two animals retreated all four paws from the tube. Animals that retreated were considered losers from the trial and the other winners. Fifteen minutes after the dominance testing, the mice were tested to determine their intra-cage hierarchy. The experimental mice met each of their cage mates individually and the testing was performed as previously described. The number of wins on each testing day in dominance trials was measured, and the hierarchical status (dominant, intermediate, and subordinate) was determined for each experimental mouse by considering animals at the top, middle, and bottom of the hierarchy in the cage, respectively.

### ***Stereotyped and compulsive behavior***

#### *Motor stereotypies test*

Experimental mice were recorded individually in a clear conventional type 2 cage filled with a 3-4 cm thick layer of fresh litter for 10 minutes. The total time, number, and mean duration of self-grooming and digging for repetitive behaviors, the number of vertical jumping, circling, head shakes, and scratching episodes for stereotyped behaviors, as well as the total time spent immobile, and the number of rearing events, were measured.

#### *Marble-burying test*

Experimental mice were individually placed in a clean type 2 cage containing 20 glass marbles (diameter: 1.5 cm) evenly spaced on 4-cm thick fresh litter. After 15 min, the animals were removed from the testing cages, and the number of marbles not buried, buried more than half,

more than two-thirds, or completely buried in the litter was determined by a trained experimenter. Marbles buried more than half were defined as marbles for which approximately 50% of the surface could be seen and those buried more than two-thirds as marbles for which only a small part of the surface could be seen in the litter. The number of marbles completely buried was determined by subtraction of the total number of marbles and the number of marbles buried more than half and more than two-thirds.

#### *Spatial Y-maze test*

Spatial Y-maze test was performed as previously described <sup>3</sup>. Briefly, each experimental mouse was placed in one random arm of the Y-maze and was allowed to freely explore the three arms for 5 min. The percentage of spontaneous alternation (SPA), alternative arm returns (AAR), and same arm returns (SAR) determined from a triplet of arm entries was measured using ANY-maze software as well as the total distance traveled, the mean speed, the number of entries (entry of the 4 paws inside an arm), the total time, number and mean duration spent in each arm and analyzed using a custom-made Python script.

#### ***Anxious-like behavior***

##### *Open-field test*

Experimental mice were placed for 10 minutes in an open-field arena (Ugo Basile, Italy; 100 x 100 cm) divided by 4 dark gray opaque partitions and walls in 4 open fields (46 x 46 cm). The total distance traveled, the total amount of time, the number of entries, the mean duration of center and corner entries, and the total time spent immobile were measured.

### *Novelty-suppressed feeding test*

Novelty-suppressed feeding (NSF) test was performed on 16h-food-deprived mice, isolated in a standard housing cage for 30 min before individual testing. Three pellets of ordinary lab chow were placed on a white tissue in the center of each open-field arena filled with a thin layer of fresh litter and lit at 60 lux. Each mouse was placed in a corner of an arena and allowed to explore for a maximum of 10 min. Latency to feed was measured as the time necessary to bite a food pellet and was scored in real-time by a trained experimenter. Immediately after an eating event, each mouse was transferred to a clean conventional type 2 cage and allowed to feed on lab chow up to 60 min after the test. Food consumption in the cage 15 min and 60 min after the test was measured.

### *Elevated plus maze test*

An elevated plus maze test was performed in a labyrinth of 4 arms 5 cm wide and located 80 cm above the ground. Two opposite arms were opened (without walls) while the other two arms were closed by side walls without the top cover. The experimental mice were placed in a closed arm of the maze and their behavior was recorded for 5 min. The total distance traveled, the total amount of time, the number of entries, and the mean duration of open-arm and closed-arm entries, as well as the total time spent immobile, were measured.

### ***Motor coordination***

#### *String test*

The testing apparatus consisted of two strings, one with and one without ridges, 38 cm long with 2 mm diameter, placed on the wooden support 49 cm above the bench surface. An empty clean cage was placed under the string for the mice to fall into. The test started by placing each

experimental mouse with all four paws on the center of the string. Their latency to fall and duration of hind-limb grasp were measured in real-time by an experienced experimenter during 2 min of the test. If the mouse did not fall, its latency to fall was measured as the maximal duration of the test. The testing was first performed on a string with ridges and one and a half hours later on a string without ridges.

## ***Olfaction***

### *Olfactory habituation/dishabituation test*

Experimental mice were first habituated in a clean conventional type 2 cage where the test took place with a clean piece of 2 cm x 2 cm Whatman paper glued to the side of the cage with adhesive paste for 5 min. 20  $\mu$ L of blossom flower odor diluted 1:2 in saline was applied to a clean paper three times for 2 min, with one-minute intertrial intervals. The adhesive paste was changed after three applications of the blossom flower odor. Next, 20  $\mu$ L of sex-matched urine collected from several 4-7 weeks old WT males or females not included in the test and pooled from different cages to avoid any olfactory bias (estrous state) was applied three times for 2 min in the same way. The total time, number, and duration of sniffing each odor, as well as time spent immobile and self-grooming were measured.

### *Food localization test*

A day before the test, pieces of a sweet butter cookie were placed in the cages of experimental mice to familiarize them with the odor of the cookie. The experimental mice were then starved overnight (approximately 16 hours). A piece of cookie (approximately 2 g) was buried underneath a 3 cm thick layer of litter in a clean conventional type 2 cage and each mouse was introduced

into the testing cage for 5 min. The latency to feed, defined as the time taken to dig out and bite a cookie, was measured.

#### *Innate olfactory test*

Experimental mice were tested in their home cage with two neutral odors (2-phenoxyethanol diluted 1:1000 in mineral oil and 3-nonanone diluted 1:10000 in mineral oil), one food odor (10% milk powder diluted in distilled water), and pure same-sex and opposite-sex urine that was collected from 10 WT mice not included in the test and pooled to avoid any olfactory bias. A piece of Whatman paper (2 cm x 2 cm) was glued to the home cage of the mice using the adhesive paste on the opposite side of the carton shelter and the mice were habituated to the paper for 5 min. The odors were then applied to the Whatman paper for 2 min as follows: 15  $\mu$ L of diluted 2-phenoxyethanol, 15  $\mu$ L of diluted 3-nonanone, 15  $\mu$ L of diluted milk, 5  $\mu$ L of male, and finally 5  $\mu$ L of female urine. The time between each trial was one minute and the adhesive paste was changed between odors. The total time, number, and duration of sniffing each odor were measured.

#### *Olfactory avoidance test*

Experimental mice were tested in their home cage with predator odors. A piece of Whatman paper (2 cm x 2 cm) was glued to the cage using the adhesive paste on the opposite side of the carton shelter, and the mice were habituated to the paper for 5 min. After habituation, 10  $\mu$ L of predator odor (a mixture of mountain lion, bobcat, fox, wolf, coyote, and marten's urines) was then applied to the Whatman paper, and total time, number, and duration of freezing, immobility and sniffing predator odors were measured for 15 min.

#### **Memory**

### *Spatial object location recognition test*

Experimental mice were habituated two times for 10 min in the open field arena to two identical Lego Duplo toys taped at the border of the center area on the same side of the arena using adhesive paste. The interval between the two habituations was one and a half hours. Two hours after the last habituation, mice were tested for their spatial memory by placing them for 10 min in the open field arena where one Lego Duplo toy (called “old object”) was placed in the same position as in habituation, while the other toy (called “spatial object”) was moved to the other side of the center area, diagonal from the first object. The total time, mean duration of contact with the “old” and “spatial” object, and number of visits to each object were measured in the habituation and testing phases. From the total time in contact with the “old” and “spatial” object, the discrimination index was calculated as:

$$\text{discrimination index} = \frac{(\text{spatialObject\_timeSpent} - \text{oldObject\_timeSpent})}{(\text{spatialObject\_timeSpent} + \text{oldObject\_timeSpent})}$$

### *Novel object recognition test*

Experimental mice were habituated two times for 10 min in the open field arena to the two identical Lego Duplo toys taped at the border of the center area on the same side of the arena using adhesive paste. The interval between the two habituations was one and a half hours. 24 hours later, experimental mice were placed in the open field arena for 10 min with one Lego Duplo toy from the habituation phase and a bigger Lego Duplo toy with a different color as a “novel” object. Both objects were placed in the same location like in the habituation phase. Two hours later, experimental mice were again placed in the open field arena for 10 min with a “novel” object from the previous phase and a Falcon tube replacing the Lego Duplo toy from the

habituation phase as the second “novel” object. Both objects were placed in the same location as in the previous testing phase. The total time, mean duration of contact, and number of visits to both objects in the habituation and testing phases were measured.

#### *Spatial Y-maze memory test*

One arm of the Y-maze was closed with the doors provided by the manufacturer. The experimental mice were placed in one opened arm of the maze and were habituated to the apparatus for 15 minutes. One hour after the habituation, all the doors of the Y-maze were opened, mice were placed again in the same arm of the maze as in the habituation phase and their spontaneous alternation was recorded for 5 minutes. The total amount of time, mean duration, number of entries to the arm of the maze closed in the habituation (“hidden arm”), and the total time spent immobile were measured.

#### ***Pup testing***

##### *Recording pups’ ultrasound vocalizations (USVs)*

On PND 6, each pup from the litter was taken from its home cage and placed into an empty plastic container (11 x 7 x 3.5 cm), which was then positioned inside a homemade sound-attenuating isolation box (32 x 21 x 14 cm) made of cardboard. USVs were recorded for 4 min using an ultrasonic microphone (Ultramic UM250K, Dodotronic, Italy), placed 20 cm above the pup in its plastic container, and connected to the SeaWave software (SeaPro Package, <http://www-9.unipv.it/cibra/seawave.html>). The total amount of time, number, duration, frequency, and amplitude of USVs were automatically measured by USVSeg software <sup>7</sup>.

### *Homing test*

The homing test was performed as previously described<sup>8</sup>. Briefly, on PND 13, all pups from the litter were separated from their mother in a clean conventional type 2 cage and placed on a heating pad set at 35°C for 30 min. Each experimental pup was then moved to a type 2 cage which contained one-third of the litter from the pup's home cage (nest area) and two-thirds of the fresh litter (unfamiliar area), by placing it at the edge of the fresh litter, and its behavior was recorded for 5 min. The latency to reach the nest area by placing the front paws into it, the total amount of time, the number of visits, and the mean duration of visits to the nest area, as well as the time spent immobile, were measured.

### *Grasping reflex test*

The grasping reflex was tested on PND7 by placing a cotton-tipped applicator close to each forepaw and hind paw of a pup. The score was given 0 if there was no grasping of the applicator with both forepaws and both hind paws, 1 if there was only one forepaw or one hind paw grasp, and 2 if the pup grasped the applicator with both forepaws and hind paws.

### *Righting reflex test*

The righting reflex of the pups was assessed on PND7 by placing them on their backs and observing their ability to flip onto all four paws within 2 minutes. The time taken to fully right and achieve the correct posture was measured. If a pup did not fully right itself within the 2-minute test period, the full duration of the test was noted as the time spent to right.

### *Cliff avoidance test*

Cliff avoidance was tested on PND7 by placing each pup near the edge of a table, gently nudging it toward the edge, and scoring avoidance. The score was given 0 if there were no movement or

falls, 1 if there were attempts to move from the cliff but with hanging limbs, and 2 if the pup successfully moved from the cliff.

### **Scoring**

Scoring was conducted manually for the pup retrieval test, sociability, social novelty, and mate interaction phases of the three-chambered test, social recognition, homing, olfactory habituation/dishabituation, innate olfactory preference, olfactory avoidance, food localization, and motor stereotypy tests. Manual scoring was done *a posteriori* by a trained experimenter blinded to the genotypes by using the Behavioral Observation Research Interactive Software (BORIS) <sup>9</sup>. For the spatial Y-maze, open-field, elevated plus maze, object location recognition, spatial Y-maze memory, and novel object recognition tests, scoring was conducted automatically using the automatic animal tracking ANY-maze software. The automatic ANY-maze software was configured to detect animal immobility using a 95% threshold sensitivity, animal entries in compartment or arms using 80% of the animal body (e.g., when 4 paws of the animals entered the chamber or arms in the three-chambered and Y-maze tests), and the mouse head for object interaction. For the pup reflexes testing, novelty-suppressed feeding, marble burying, and string tests, scoring was done in real-time by a trained experimenter not blinded to the genotypes. Behavioral criteria to exclude animals from behavioral tests were: over 30% of the time spent immobile and/or lack of exploration of all arms or compartments of the testing apparatus.

### **Quantitative PCR (qPCR)**

Three-month-old WT, Neo<sup>+</sup> KO1, and Neo<sup>-</sup> KO1 dams and two-month-old naïve WT and Neo<sup>+</sup> KO1 mice that underwent social interaction with unfamiliar conspecifics (SI condition) or stayed in

their home cages as basal controls (basal condition) were euthanized by cervical dislocation. Their brains were rapidly dissected, and 1 mm thick brain slices were prepared using a coronal mouse brain matrix. The prefrontal cortex (PFC), nucleus accumbens (NAC), caudate putamen (CPU), paraventricular (PVN), and supraoptic (SON) nuclei were collected using a 2 mm diameter puncher (two punches for lateralized regions) as described in <sup>3</sup> and immediately frozen until further use. After tissue homogenization using a polytron (Grosseron, France, PT1200E), total RNAs were extracted according to the Direct-zol™ RNA Microprep and Miniprep kit (ZymoResearch, Ozyme, France, R2063 and R2050, respectively) and quantified using ND2000 nanodrop (Thermo Fisher Scientific, France). The cDNAs were generated from 0.5 (2 punches) or 0.25 µg (1 punch) of total RNAs using the SensiFast reverse transcriptase kit (Ozyme-Bioline, BIO-65054) and quantitative PCR (qPCR) was performed in triplicates according to 2X ONE Green Fast qPCR premix (Ozyme, France, OZYA008-1000) with 1 µL of cDNA and 1 µM of each validated couple of primers (list of primers in **Table S6**). The following qPCR protocol was applied for 40 cycles: 95 °C for 5 s, 60 °C for 15 s, and 60 °C for 30 s.

### **Library Preparation and NovaSeq sequencing**

Two-month-old naïve WT (N = 3), Neo<sup>+</sup> KO1 (N = 4), and Neo<sup>-</sup> KO1 (N = 3) female mice were euthanized by cervical dislocation 45 min after social interaction with their genotype-matched littermates in the LMT. Their brains were rapidly dissected, and 1 mm thick brain slices were prepared using a coronal mouse brain matrix. The PVN was collected using a 2 mm diameter puncher as previously described and immediately frozen until further use. After tissue homogenization using a polytron (Grosseron, France, PT1200E), total RNAs were extracted

according to the Direct-zol™ RNA Microprep kit (ZymoResearch, Ozyme, France, R2063) and quantified using ND2000 nanodrop (Thermo Fisher Scientific, France) and Qubit 4.0 Fluorometer (Life Technologies, Carlsbad, CA, USA). RNA integrity was checked with RNA Kit on Agilent 5300 Fragment Analyzer (Agilent Technologies, Palo Alto, CA, USA). RNA quantity and integrity were comprised between 174 to 1086 ng, 5.8 to 36.3ng/μL, RQN 5.1 to 10 for the 10 samples.

RNA sequencing library preparation was performed at Genewiz-Azenta using NEBNext Ultra II Directional RNA Library Prep Kit for Illumina by following the manufacturer's recommendations (NEB, Ipswich, MA, USA). Briefly, mRNAs were first enriched with Oligo(dT) beads. Enriched mRNAs were fragmented for 15 minutes at 94 °C. First strand and second strand cDNAs were subsequently synthesized. The second strand of cDNA was marked by incorporating dUTP during the synthesis. cDNA fragments were end repaired and adenylated at 3'ends, and universal adapters were ligated to cDNA fragments, followed by index addition and library enrichment by limited- cycle PCR. The incorporated dUTP in second strand cDNA quenched the amplification of second strand, which helped to preserve the strand specificity. Sequencing libraries were validated using NGS Kit on the Agilent 5300 Fragment Analyzer (Agilent Technologies, Palo Alto, CA, USA), and quantified by using Qubit 4.0 Fluorometer (Invitrogen, Carlsbad, CA).

The sequencing libraries were multiplexed and loaded on the flow cell of the Illumina NovaSeq X plus instrument according to manufacturer's instructions at Genewiz-Azenta. The samples were sequenced using a 2x150 Pair-End (PE) configuration v1.5 with 20 million guaranteed paired-end reads per sample (20.5 to 52.9M for the 10 samples). Image analysis and base calling were conducted by the NovaSeq Control Software v1.7 on the NovaSeq instrument. Raw sequence data (.bcl files) generated from Illumina NovaSeq was converted into fastq files and de-multiplexed

using Illumina bcl2fastq program version 2.20. One mismatch was allowed for index sequence identification.

Read analysis was conducted using the nfcore/RNASeq pipeline (<https://nf-co.re/rnaseq/>, version 3.22.1). Following quality and adapter trimming with trim\_galore, the reads were mapped to the GRCm39 mouse reference genome (GCA\_000001635.9) using STAR <sup>10</sup>. Various tools are integrated into this pipeline, including RSeQC, QualiMap, and dupRadar, for sample quality verification and mapping assessment. Transcripts were identified by geneID using the gene transfer format, and the number of reads for each mRNA were quantified using the SALMON software tool <sup>11</sup>. The DESeq2 R package <sup>12</sup> was used for normalizing gene expressions and identifying differentially expressed transcripts among the experimental conditions. Based on PCA analysis, one Neo<sup>+</sup> KO1 sample (with the lowest total RNA quantity) differed from the other samples and thus was excluded from analysis, reaching n = 3 per genotype. We compared WT and Neo<sup>-</sup> KO1 vs. Neo<sup>+</sup> KO1 mice to identify transcripts differentially regulated due the Neo expression, as well as Neo<sup>-</sup> KO1 and Neo<sup>+</sup> KO1 vs. WT mice to identify transcripts differentially regulated due *Arc/Arg3.1* deletion. To visualize and analyze those transcripts, we used Volcano plot (ggplot2 ), heatmap (pheatmap R <sup>13</sup>), gene ontology (gprofiler2 <sup>14</sup>, STRINGdb <sup>15,16</sup> et rbioapi <sup>17,18</sup> R package), through literature mining and autism ([AutDB](http://autism.mindspec.org/autdb/Welcome.do) at <http://autism.mindspec.org/autdb/Welcome.do> and SFARI gene at <https://gene.sfari.org/>) and schizophrenia (<http://szdb.org/>) databases. For STRING network analysis, background genes (*e.g.*, the total number of genes expressed in the PVN with baseMean>20) were imputed to the network of the dysregulated genes (baseMean>20). Among our dysregulated genes *Atp6v0c-ps2*, was annotated as a pseudogene to which STRING cannot assign a protein. After conversion using

Muscle and EMBOSS TRANSEQ, followed by alignment with Clustal Omega, *Atp6v0c-ps2* protein sequence is identical to *Atp6v0c*. Therefore, we included it in our protein network and this pseudogene is probably an alternate transcript variant. For the entire STRING analysis, a score threshold of 500 was established. We used the R packages *rbioapi*<sup>17,18</sup> and *STRINGdb*<sup>15,16</sup> for network construction, image generation, and enrichment. For the protein network, we requested the addition of 45 proteins, which will then be filtered to retain only those present in the background.

### ***Arc/Arg3.1* genomic environment exploration**

The three-dimensional genomic environment *interaction* of the murine *Arc/Arg3.1* gene and its topologically associated domain (TAD) was explored using the single-cell Hi-C data from all neuronal subtypes available in the 3D Genome Browser dataset<sup>19</sup>. This browser using cortical pyramidal neurons from layers 2/5 (**Figure S11**) and 6, hippocampal granule and pyramidal neurons, interneurons, medium spiny neurons, and neonatal neurons, enables visualization of similar TADs of chromosome 15, as well as similar interactions between short- and long-distance genomic regions that are in close three-dimensional nuclear proximity regardless of their linear chromosomal distance. The chromatin interactions on chromosome 15 were visualized in the region from approximately 73250-75000 kb. The Neo cassette in *Arc/Arg3.1* gene is located in a small topologically associating domain (TAD) on murine chromosome 15, and thus unlikely to cause major gene expression effects.

## Western blot

Two-month-old WT, Neo<sup>+</sup> KO1, and Neo<sup>-</sup> KO1 naïve mice that previously underwent behavioral assays were euthanized by cervical dislocation. Their brains were rapidly dissected, and 1 mm thick brain slices were prepared using a coronal mouse brain matrix. The olfactory bulbs (OB) were directly dissected, while PVN was collected using a 2 mm diameter puncher, as previously described and immediately frozen until further use. The brain tissues were placed in 20  $\mu$ L of Radio-Immunoprecipitation Assay buffer (RIPA buffer, 50 mM Tris HCl pH=7.4, 150 mM NaCl, 1% Igepal CA-630 (Sigma-Aldrich, USA, I3021), 1% Halt<sup>TM</sup> protease and phosphatase inhibitor cocktail (Thermo Fisher Scientific, France, 78429), 1  $\mu$ M PMSF), homogenized by sonication 2 times for 20 seconds, and centrifuged at 10000 g for 10 minutes. Supernatants were collected and protein concentration was determined using the Bradford assay (Bio-Rad Protein Assay Dye Reagent Concentrate, Bio-Rad Laboratories, USA, 5000006).

The Human Embryonic Kidney 293 cell line (HEK293A) was cultivated in DMEM without phenol red supplemented with 10% heat-inactivated fetal bovine serum and 1% penicillin. The cells were plated in 6-well cell culture plates at concentration  $5 \times 10^5$  cells/well and transfected with 5.5 ng/1 kb of Neo<sup>+</sup> pcDNA3.1 plasmid and Neo<sup>-</sup> pUC19 control plasmid using Metafectene PRO (Biontex, Germany, T020-1.0) following the manufacturer's protocol. Two days after the transfections, cells were starved overnight by changing their culture medium to DMEM without phenol red and serum, or their medium was changed to fresh. Five independent experiments were performed with two biological replicates in each experiment. The cellular lysates were harvested in 150  $\mu$ L of RIPA buffer, frozen at -20°C, thawed, homogenized by sonication 2 times for 20 seconds, and centrifuged at 10000 g for 10 minutes. Supernatants were collected and

protein concentration was determined using the Bradford assay (Bio-Rad Protein Assay Dye Reagent Concentrate, Bio-Rad Laboratories, USA, 5000006).

40 µg of each sample were mixed with Laemli SDS Reducing Sample Buffer (Thermo Fisher Scientific, France, J61337.AC), heated at 85°C for 10 minutes, separated by SDS-PAGE electrophoresis and transferred to a nitrocellulose membrane (Trans-Blot Turbo RTA Transfer Kit Nitrocellulose, Bio-Rad Laboratories, USA, 1704271) using the Trans-Blot Turbo Transfer System (Bio-Rad Laboratories, USA, 1704150). Membranes were briefly stained with 0.1% Ponceau stain, de-colored in distilled water, blocked in 5% milk in Tris Buffered Saline with 0.1% Tween® 20 (TBS-T; Sigma-Aldrich, USA, P1379) for one hour at room temperature (RT) and then incubated with mouse anti-p44/42 MAPK (ERK1/2) (1:1000; monoclonal to p44/42 MAPK, Cell Signaling Technology, USA, #9107) and rabbit anti-phospho-p44/42 MAPK (ERK1/2) (1:2000; monoclonal to phospho-p44/42 MAPK (Thr202/Tyr204), Cell Signaling Technology, USA, #4370) primary antibodies for both PVN tissue and HEK293 cell lysate samples, or mouse anti-S6 (1:1000; monoclonal to S6, Cell Signaling Technology, USA, #2317) and rabbit anti-phospho-S6 (1:2000; monoclonal to phospho-S6 (Ser235/236), Cell Signaling Technology, USA, #4858) primary antibodies for HEK293 samples, or rabbit anti-Arc/Arg3.1 (1:1000; monoclonal to Arc/Arg3.1, Abcam, USA, ab183183) primary antibody for brain tissue samples only overnight at 4°C. Membranes were washed (3 x 10 minutes) in TBS-T and incubated for one hour with goat anti-mouse IRDye®680CW (1:15000; LI-COR®, Lincoln, USA, 926-68070) and anti-rabbit IRDye®800CW (1:15000; LI-COR®, Lincoln, USA, 926-3221) secondary antibodies in TBS-T with 5% milk at RT. Finally, blots were washed (3 x 10 minutes) in TBS-T and visualized by the Odyssey CLx Imager (LI-COR Biosciences, USA, 9140). After visualization, membranes were briefly washed in distilled

water, stripped in 0.2 M NaOH for 10 min at RT, washed in distilled water until the pH returned to neutral, blocked again as previously described, and incubated with rabbit anti-GAPDH (1:15000; polyclonal, Proteintech, USA, 10494-1-AP), or rabbit anti-aminoglycoside phosphotransferase (Neo product) (1:150, rabbit polyclonal to Neomycin phosphotransferase II, Sigma-Aldrich, USA, #06-747) primary antibodies overnight at 4°C. Finally, membranes were washed as described and incubated with goat anti-rabbit IRDye®680CW (1:15000; LI-COR®, Lincoln, USA, 926-68070) secondary antibody following the previously described procedure. All the blots were analyzed and quantified in ImageJ using the Gel Analysis plugin<sup>20</sup>. ERK1/2 and S6 protein levels were normalized to GAPDH protein levels, while phospho-ERK1/2 and phospho-S6 levels were normalized to total ERK1/2 or S6 protein levels. For the experiments with HEK293 cell lysate samples, protein levels of pERK, ERK1/2, S6, and pS6 in biological replicates from each experiment were averaged, and all the data from the same experiment were normalized to the samples from pUC19 starved conditions as a control for interblot normalization. For the PVN and OB lysate samples, pERK and ERK1/2 levels were normalized to the same control WT sample present on each blot prepared by mixing aliquots of both male and female WT samples from the PVN.

The images of all blots used for quantification and the raw quantification data are available at <https://doi.org/10.5281/zenodo.20589372>.

## **Immunohistochemistry**

The brains for immunostaining were collected from dams on postnatal day 14 that were anesthetized by a mix of 100 mg/kg ketamine and 5 mg/kg xylazine, while their pups were

euthanized by guillotine. Dams were perfused transcardially with 0.1 M PBS followed by cold 0.1 M PBS containing 4% paraformaldehyde (PFA). Brains were removed, post-fixed overnight in 4% PFA, and cryoprotected in 0.1 M PBS containing 30% sucrose. After the brains sank in sucrose solution, they were snap-frozen in cold isopentane (temperature between -20°C and -30°C) and kept at -80°C until further processing. The frozen brains were embedded separately in the Tissue-Tek O.C.T. compound and cut into 30 µm-thick slices on a CryoStar NX70 cryostat (MM France, France, 957060). The brain sections were kept in PBS containing 0.1% sodium azide until immunostaining.

The snouts for immunostaining were collected from two-month-old naïve WT and *Neo<sup>+</sup> Arc/Arg3.1<sup>+/-</sup>* females that had previously undergone behavioral assays. The females were anesthetized by a mix of 100 mg/kg ketamine and 5 mg/kg xylazine and perfused transcardially with 0.1 M PBS, followed by cold 0.1 M PBS containing 4% PFA. Snouts were removed, post-fixed overnight in 4% PFA. at 4°C. Fixed snouts were quickly rinsed in PBS to remove residual fixative and then immersed in TBD-1 Rapid Decalcifier (Thermo Fisher Scientific) at room temperature for 20 min. The decalcified snouts were rinsed 3 times with PBS and then incubated overnight in a cryoprotective solution (30% sucrose, 50% Tissue-Tek OCT compound) at 4°C. The following day, the snouts were embedded in Tissue-Tek OCT compound and snap-frozen in isopentane cooled to -40 °C. Cryosections of 14 µm thickness were cut using a CryoStar NX70 cryostat (MM France, France, 957060), mounted directly onto SuperFrost™ Plus Adhesion microscope slides (Epredia), and stored at -80 °C until use.

Sections were washed (1 × 15 min) in PBS with shaking (150 rpm) and then blocked for one hour at room temperature in PBS containing 10% natural goat serum, 0.4% Triton, and 10 mg/mL

bovine serum albumin (BSA). After blocking, the sections were incubated in the blocking solution supplemented with oxytocin primary antibody (1:500, rabbit monoclonal [EPR20973] to oxytocin-neurophysin 1, Abcam, USA, ab212193), aminoglycoside phosphotransferase (Neo product) primary antibody (1:150, rabbit polyclonal to Neomycin phosphotransferase II, Sigma-Aldrich, USA, #06-747), or oxytocin and Arc/Arg3.1 primary antibodies (rabbit polyclonal to oxytocin, Phoenix Pharmaceutical, USA, #G-051-01; mouse monoclonal [1G4B5] to Arc/Arg3.1, Proteintech, USA, #66550-1-Ig) and incubated overnight at 4°C. Sections were washed (3 x 15 min) in PBS with shaking (150 rpm) after which they were incubated with PBS containing 10 mg/mL BSA supplemented with secondary antibodies (1:500, Cy3-conjugated goat anti-rabbit IgG, Jackson ImmunoResearch, USA, lot #150960 for oxytocin and Neo product immunolabeling, or 1:400, goat anti-mouse IgG 568nm, Abcam, USA, ab175473 and 1:200, goat anti-Rabbit IgG 488nm, Abcam, USA, ab150077 for Arc/Arg3.1 and OT co-staining) and Hoechst B2261 (1:1000, Sigma-Aldrich, USA, 14533) for one hour at room temperature with shaking (150 rpm). Samples were washed (3 x 15 min) in PBS with shaking (150 rpm) and mounted on Superfrost Plus adhesion microscope slides (Epredia, USA, J1800AMNZ) with Immu-Mount mounting medium (Epredia, USA, 9990412).

### ***Image acquisition and analysis***

For the oxytocin immunolabeling, images of all fluorescent-labeled sections were acquired using a 20x objective and Zeiss Axioscan Z1 (Carl Zeiss Microscopy, Germany). The lamp settings were kept the same during the acquisition of all images, with lamp intensity set at 30% and exposure time at 11.5 ms for Hoechst, lamp intensity at 15% and exposure time at 40 ms for Cy3. To improve the quality of the image, three images were taken along the z-axis with 11 µm range and averaged to obtain the final images used for quantitative analyses. The image analysis of oxytocin

immunolabeling was performed using QuPath software <sup>21</sup>. The number of oxytocinergic neurons was determined in the PVN and SON along the anterior-posterior axis, while the number, fluorescence intensity, and density of oxytocin fibers were determined in the projection areas of the oxytocinergic neurons (PFC, NAC, CPU, MPOA, BNST). The number of oxytocinergic neurons for each dam was determined by averaging the number in the two hemispheres and, as the number of neurons did not show differences between genotypes along the anterior-posterior axis of the PVN and SON, one specific coordinate with the highest number of slices for each dam was chosen (bregma -0.94) and the number of oxytocinergic neurons for this coordinate was averaged to get one final value per dam. For the fibre quantification, one specific coordinate with the lowest variability of fiber density was chosen in the NAC (bregma 0.86) and PFC (1.78), and the values were first averaged for the two hemispheres on the same slice, and then the values for all the slices were averaged to get one value per dam.

For Neo product immunolabeling, images for all fluorescent-labelled sections were acquired using a 20x objective with 0.8 numerical aperture and Zeiss inverted Axio Observer Z1 confocal microscope (Carl Zeiss Microscopy, Germany). The ranges of lasers were adjusted to avoid overlapping of signals from different fluorophores, with 405 nm laser detecting Hoechst B2261 signal in the range 410-471 nm and 561 nm laser detecting Cy3 signal in the range 565-620 nm. The laser settings were kept the same during the acquisition of all images, with the laser power at 2.0, master gain at 750, and pinhole opening of one airy unit for both lasers. Qualitative image analysis of Neo product immunolabeling was performed in Fiji <sup>20</sup>.

Representative images used for quantitative analysis of oxytocin and qualitative analysis of Neo product immunolabelling are available at <https://doi.org/10.5281/zenodo.20589372>.

### **Chronic oxytocin treatment**

One week before starting the treatment, WT and Neo<sup>+</sup> KO1 mice were implanted with RFID transponders for automatic chip detection in the Live Mouse Tracker (LMT), as detailed in <sup>4</sup>. A solution of 20 µg/kg (0.3 IU) oxytocin was prepared by diluting 1 mg of ≥95% oxytocin corresponding to 600 IU (OT; Tocris Bioscience, USA, batch 16A/276657) in sterile saline (NaCl 0.9%). Aliquots of 250 µL of diluted oxytocin (OT) and saline (SAL) were stored at -20°C and on each treatment day, a fresh aliquot of OT and SAL was thawed. Mice were weighed on the first day of treatment and every 3-4 days thereafter to adjust the OT or SAL dosage accordingly. OT or SAL was administered intranasally every day for 28 days. Half of the dose was delivered into one nostril, allowing the mouse to inhale it, followed by the other half into the opposite nostril. Injections were given in the morning in a quiet room separate from the testing room, except on days 0, 7, 14, 21, and 28. On these days, injections were given in the experimental room, and 15 minutes later, the mice were subjected to social interaction in the LMT with up to four unfamiliar, age-, sex-, and treatment-matched congeners as previously described to evaluate the effect of OT treatment on social interaction.

### **Statistical analysis**

All data and statistical analyses were performed using R software (version 4.3.1). Animal outliers ( $\pm 2$  standard deviations) were removed from the qPCR dataset (two WT females from two different experimental cohorts), while for behavior, females from one cohort tested in maternal behavior assays were excluded due to the abnormal behavior of the WT (increased jumping while

manipulating, increased self-grooming and immobility displayed in different behavior assays compared to WT from other experimental cohorts). For qPCR after maternal behavior assays, batch corrections were applied using the ComBat sva package<sup>22</sup>. The behavior of WT from distinct experimental cohorts tested in the three-chambered, object location recognition, motor stereotypy tests, and the Live Mouse Tracker remained consistent and did not require correction, so the data from WT mice from different cohorts were pooled together. For comparisons between groups, the Kruskal-Wallis tests with Dunn's posthoc tests were performed using the rstatix package<sup>23</sup>. P-values were adjusted with Benjamini-Hochberg correction<sup>24</sup>. For the pup retrieval test, comparisons of retrieval latencies between groups were conducted by the Kaplan-Meier test from the survminer package<sup>25</sup>, and the percentage of females retrieving pups, as well as pup reflex scores between groups was compared by the Fisher's test using the ggstatsplot package<sup>26</sup>. Furthermore, the integration of qPCR and maternal behavior data was performed using DIABLO (Multiblock (s)PLS-DA) implemented in the mixOmics package<sup>27</sup>. The compromise parameter was set at 0.8 for data obtained in dams and at 0.75 for data obtained in naïve mice to maximize the correlation between qPCR and behavioral datasets. The probability of error level (alpha) was set at 0.05. Raw data are available at <https://doi.org/10.5281/zenodo.15607567>, while mean  $\pm$  standard deviation (sd), and statistics are represented in **Tables S1-S5**.

## SUPPLEMENTARY FIGURES

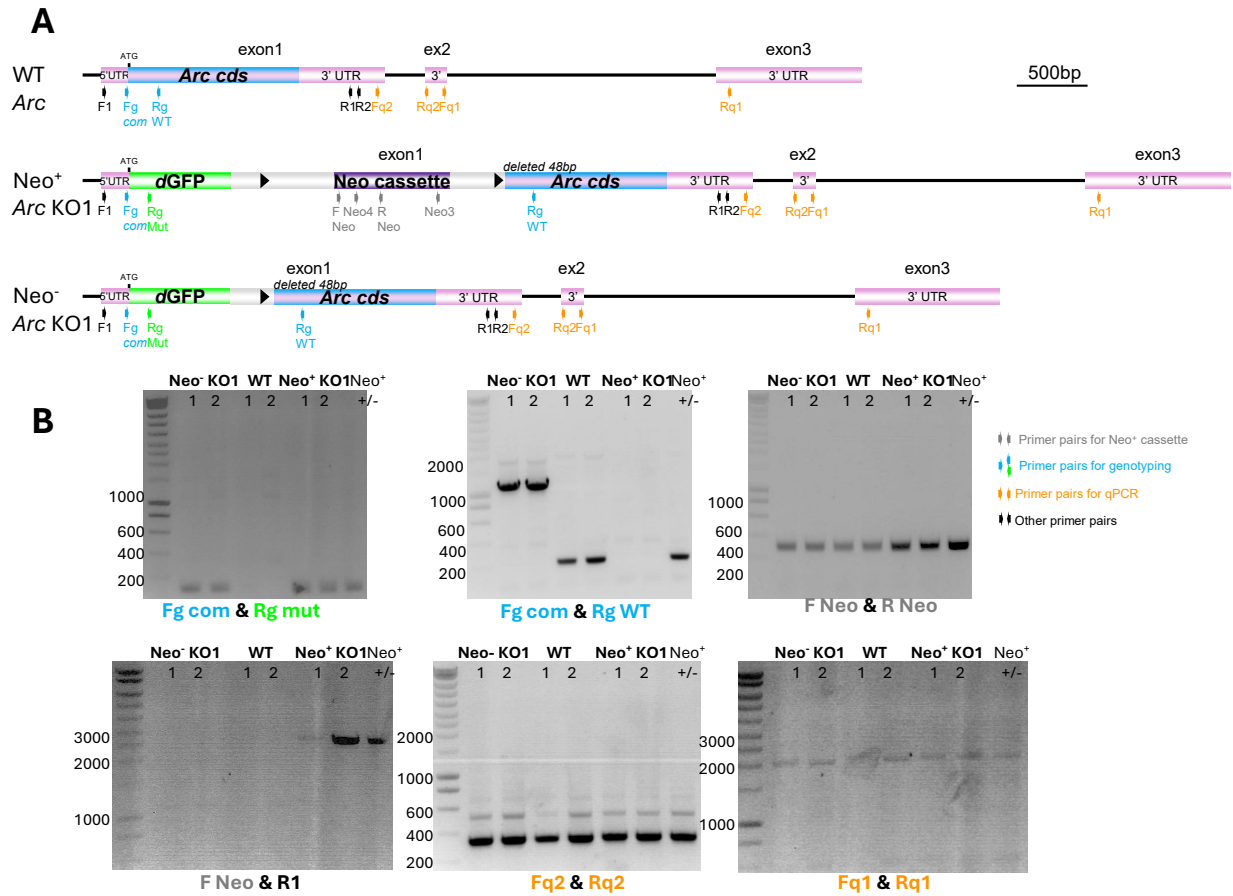

**Figure S1. Arc/Arg3.1 gene, Neomycin cassette and KO1 construct**

Mus musculus activity regulated cytoskeletal-associated protein (Arc) gene is reversely located at chromosome 15 (NC\_000081.7, reference GRCm39 C57BL/6J) and encodes two Arc mRNA isoforms (NM\_018790.3 sharing 99,9% homology with NM\_001276684.1) and one Arc coding sequence (cds) and protein, located in exon1. Neo<sup>+</sup> KO1 mice were generated by inserting the destabilized d2EGFP and Neomycin cassette (F Neo and R Neo primers amplify a non-specific band at the same size than Neo) flanked by Flox sites, at the ATG start codon of Arc cds, thus truncating 48bp of Arc cds through homologous recombination (Wang, 2006; **A**). Using distinct primers and Sanger sequencing on genomic DNA, we identified and detailed the exact sequence of Neo<sup>+</sup> KO1 constructs and Neo<sup>-</sup> KO1 mice after Cre recombination (sequence in supplementary materials and methods; **B**). Arc/Arg3.1, activity regulated cytoskeletal-associated protein or activity-regulated gene of 3.1 kilobases; cds, coding sequence.

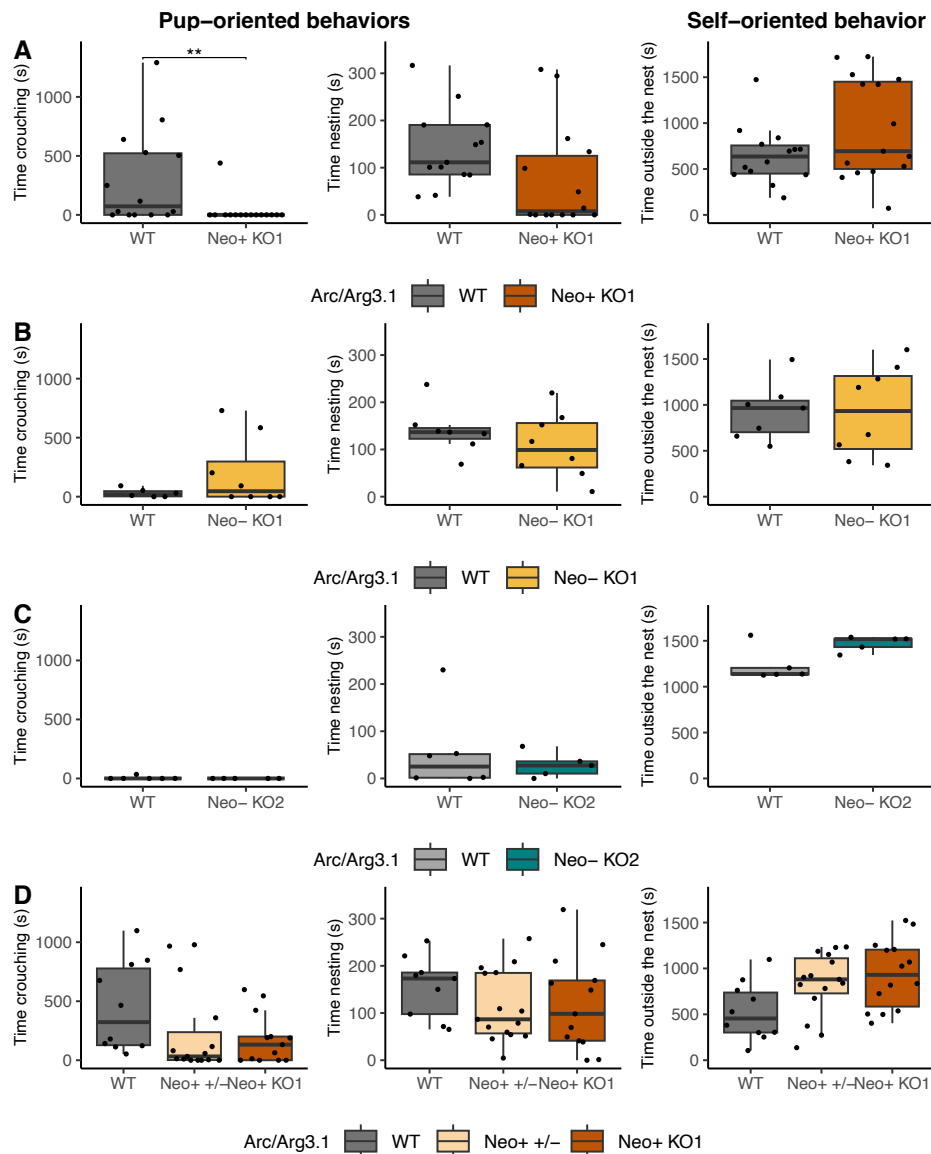

**Figure S2.  $Neo^+$  *Arc/Arg3.1*-deficient dams display maternal care impairments**

In the pup retrieval test with their genotype-matched pups,  $Neo^+$  KO1 dams of the first *Arc/Arg3.1* line (brown;  $n = 15$ ) spent significantly less time crouching over the pups, and nesting compared to WT (dark gray;  $n = 14$ ), with comparable time spent outside of the nest between genotypes (**A**).  $Neo^-$  KO1 dams (yellow;  $n = 8$ ) showed no difference in the time spent crouching over the pups, nesting, or outside the nest compared to WT (dark gray;  $n = 7$ ; **B**). Similarly,  $Neo^-$  KO2 dams from the second *Arc/Arg3.1* line (turquoise;  $n = 5$ ) showed no difference compared to WT (pale gray;  $n = 6$ ; **C**). In the pup retrieval test with  $Neo^+$  *Arc/Arg3.1*<sup>+/-</sup> pups, both  $Neo^+$  *Arc/Arg3.1*<sup>+/-</sup> (beige;  $n = 15$ ) and  $Neo^+$  KO1 dams (brown;  $n = 14$ ) spent less time crouching over the pups and nesting, and more time outside the nest compared to WT (dark gray;  $n = 10$ ; **D**). Data are presented as mean  $\pm$  sd in **Table S1**. All groups were compared by Kruskal-Wallis test followed by Dunn's post-hoc test, with an asterisk indicating genotype effects ( $p = P$  adjusted). \*  $p < 0.05$ ; \*\*  $p < 0.01$ ; \*\*\*  $p < 0.001$ .

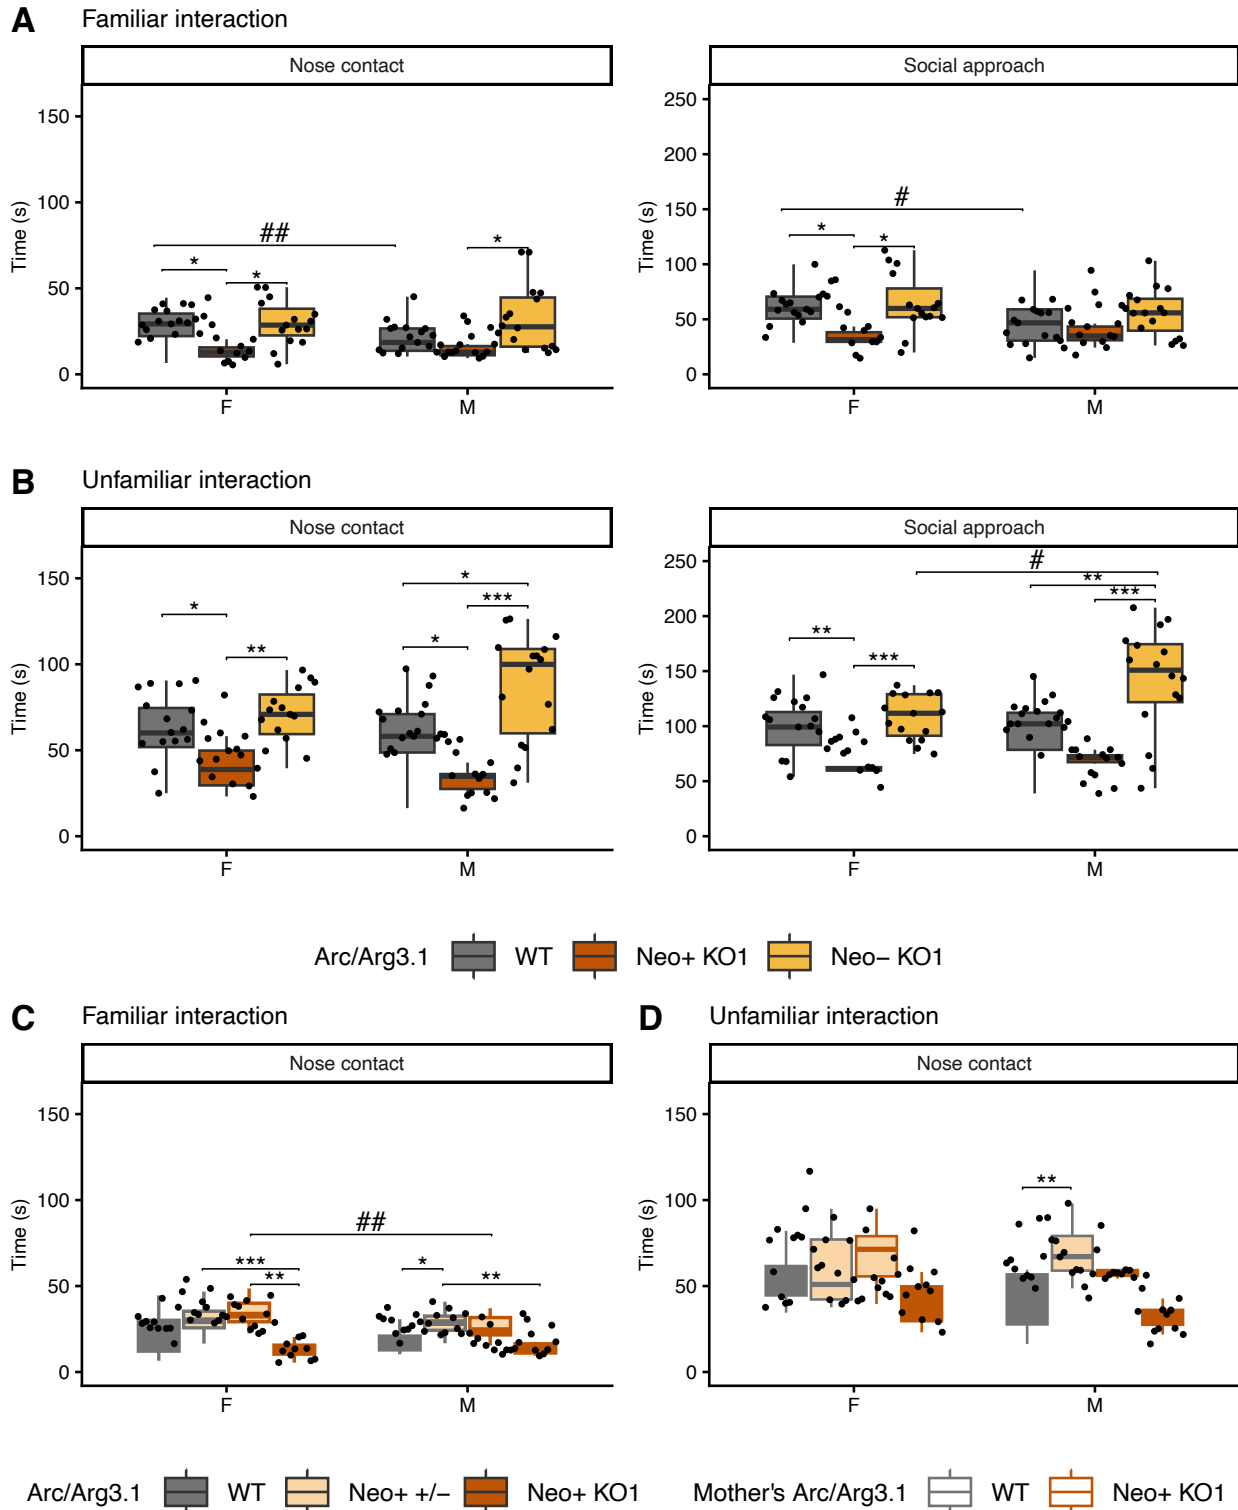

**Figure S3. Social interaction impairments are more pronounced in Neo<sup>+</sup> KO1 females than males**

In the LMT, when interacting with genotype-matched cage mates, Neo<sup>+</sup> KO1 females (brown; n = 6) displayed significantly reduced time in nose contact and social approach compared to WT

females (dark gray; n = 23), while Neo<sup>-</sup> KO1 females (yellow; n = 15), Neo<sup>+</sup> *Arc/Arg3.1* KO1 (brown; n = 6) and Neo<sup>-</sup> KO1 males (yellow; n = 16) displayed no difference compared to WT (dark gray; n = 25 males; **A**). When interacting with unfamiliar conspecifics, both Neo<sup>+</sup> KO1 females and males showed significantly decreased time in nose contact, while only females spent less time in social approach compared to WT. In contrast, Neo<sup>-</sup> KO1 males showed increased time in nose contact and social approach compared to WT males, and increased time in social approach compared to Neo<sup>-</sup> KO1 females (**B**). Neo<sup>+</sup> *Arc/Arg3.1*<sup>+/-</sup> males or females raised by either WT (beige with dark gray outline; n = 32, 16 females and 16 males) or Neo<sup>+</sup> KO1 dams (beige with brown outline; n = 27, 15 females and 12 males) showed no impairments in social interaction with their genotype-matched cage mates compared to WT (dark gray; n = 18, 8 females and 10 males), while Neo<sup>+</sup> KO1 control mice (brown; n = 12, 6 females and 6 males) showed reduced social interaction compared to WT (**C**). No difference in social interaction with unfamiliar conspecifics was observed between Neo<sup>+</sup> *Arc/Arg3.1*<sup>+/-</sup> mice raised by Neo<sup>+</sup> KO1 or WT dams, while Neo<sup>+</sup> KO1 controls showed reduced social interaction compared to WT (**D**). Data are presented as mean ± sd in **Table S2**. All groups were compared by the Kruskal-Wallis test followed by Dunn's post-hoc test, with an asterisk indicating genotype effects and ladder sex effects (p = P adjusted). \* or # p < 0.05; \*\* or ## p < 0.01; \*\*\* or ### p < 0.001.

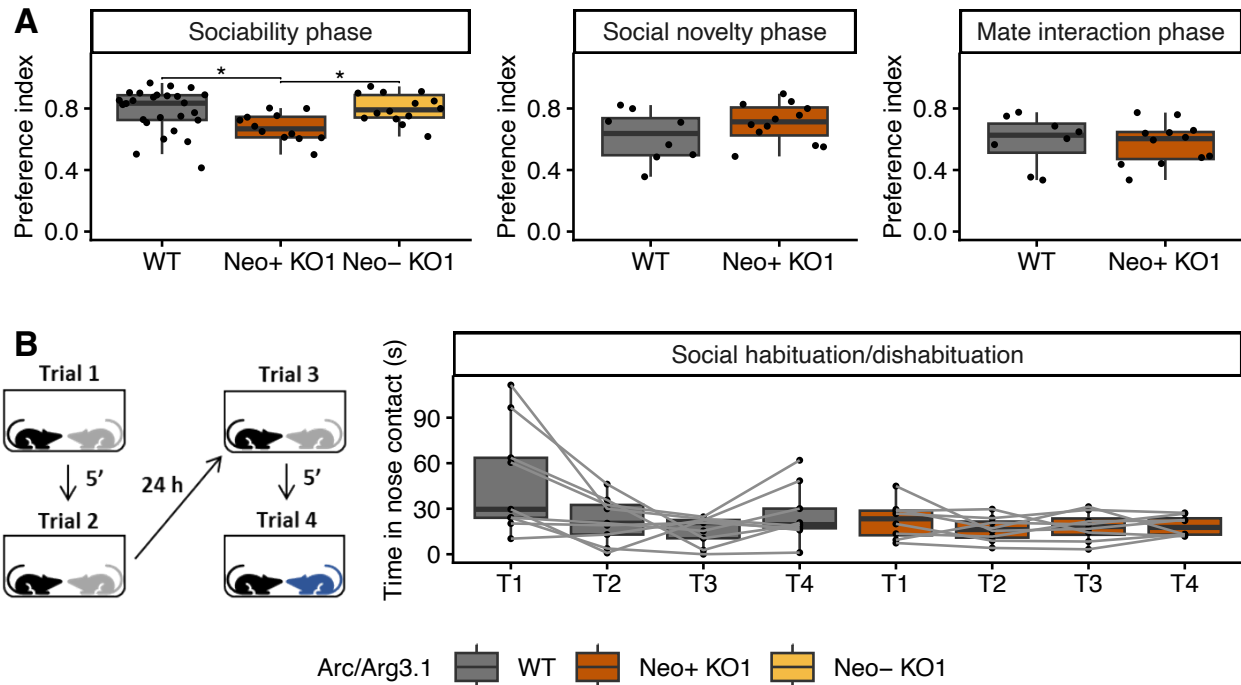

#### Figure S4. Neo<sup>+</sup> KO1 mice display social deficits, rather than social memory impairments

In the three-chambered test, Neo<sup>+</sup> KO1 mice (brown; n = 6 females and 6 males) showed reduced sociability preference index and no difference in the social novelty or cage mate preference index compared to WT (dark gray; n = 4 females and 4 males; **A**). In the social recognition test depicted in the scheme, WT mice (n = 4 females and 5 males) displayed habituation to the unfamiliar WT interactor over the first three trials, whereas Neo<sup>+</sup> KO1 mice (n = 4 females and 4 males) did not, due to low time in nose contact with the interactor already in the first trial (**B**). Data are presented as mean ± sd in **Table S1**. All groups were compared by the Kruskal-Wallis test followed by Dunn's post-hoc test, with an asterisk indicating genotype effects (p = P adjusted). \* p < 0.05; \*\* p < 0.01; \*\*\* p < 0.001.

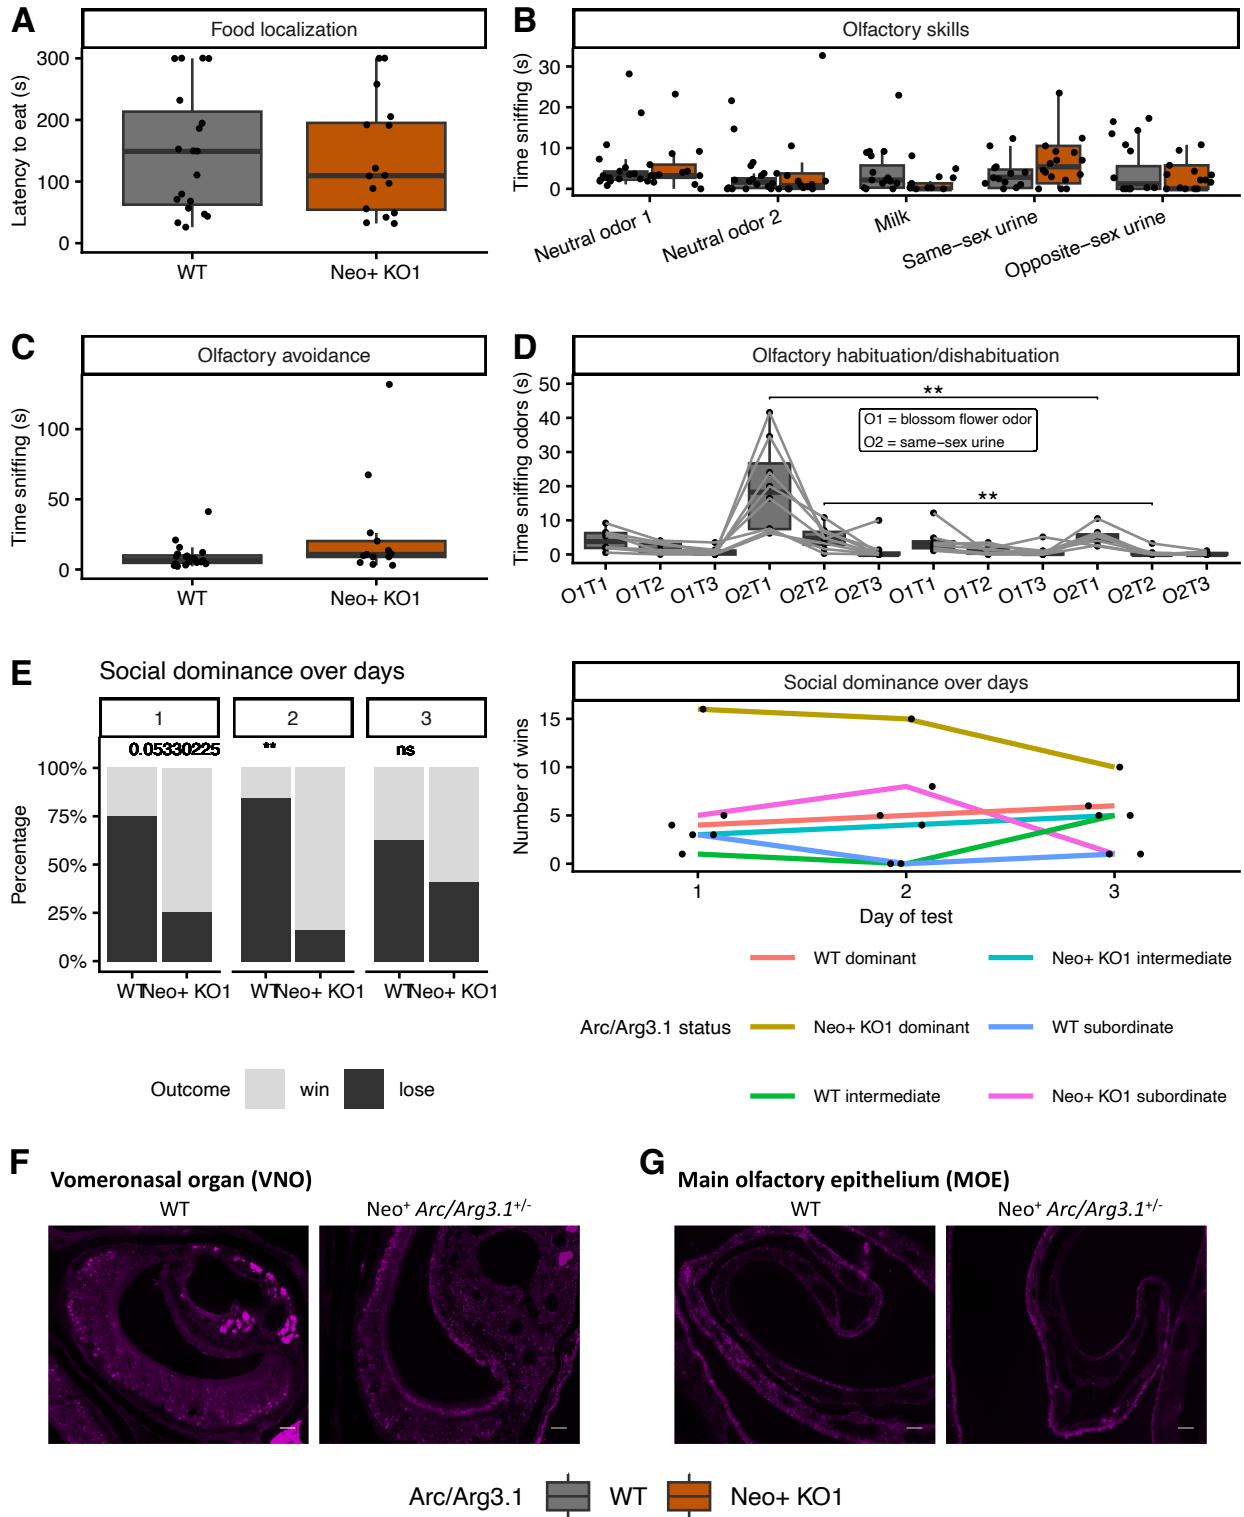

**Figure S5. Neo<sup>+</sup> KO1 mice display olfactory impairments only with social odors**

In the food localization test, Neo<sup>+</sup> KO1 mice (brown; n = 12 females and 4 males) displayed no difference in the latency to eat compared to WT (dark gray; n = 7 females and 12 males) (A). In the innate olfactory preference test, Neo<sup>+</sup> KO1 mice (brown; n = 9 females and 4 males) showed

no difference in the time sniffing both neutral odors 2-phenoxyethanol (O1) and 3-nonanone (O2), milk food odor (O3), or social odors (same-sex O4 and opposite-sex urine O5) compared to WT (dark gray; n = 10 females and 10 males) (B). In the olfactory avoidance test, Neo<sup>+</sup> KO1 mice (brown; n = 19 females and 4 males) displayed no difference in the time sniffing predator odors compared to WT (dark gray; n = 10 females and 10 males) (C). In the olfactory habituation/dishabituation test, Neo<sup>+</sup> KO1 mice (brown; n = 4 females and 4 males) showed reduced time sniffing social odor (same-sex urine (O2)), while the time sniffing non-social odor (blossom flower odor opposite-sex urine (O1) and habituation over the three trials to both odors was comparable to WT (dark gray; n = 4 females and 4 males) (D). In the social dominance test, Neo<sup>+</sup> KO1 mice (n = 8 females and 8 males) won in more trials than WT mice (n = 8 females and 8 males) over the three days of the test since Neo<sup>+</sup> KO1 mice dominant (ochre), intermediate (turquoise) and subordinate (pink) in their home cage were winning more over dominant (salmon), intermediate (green) and subordinate (blue) WT mice (E). Neo protein product was not detected in the olfactory structures, including the VNO (F) and MOE (G) in Neo<sup>+</sup> Arc/Arg3.1<sup>+/-</sup> mice. Data are presented as mean ± sd in Table S1. Groups in A-D were compared by the Kruskal-Wallis test followed by Dunn's post-hoc test, or by Fisher's exact test in E (left) with an asterisk indicating genotype effects (p = P adjusted). \* p < 0.05; \*\* p < 0.01; \*\*\* p < 0.001; ns, not significant. OB, olfactory bulb; VNO, vomeronasal organ; MOE, main olfactory epithelium.

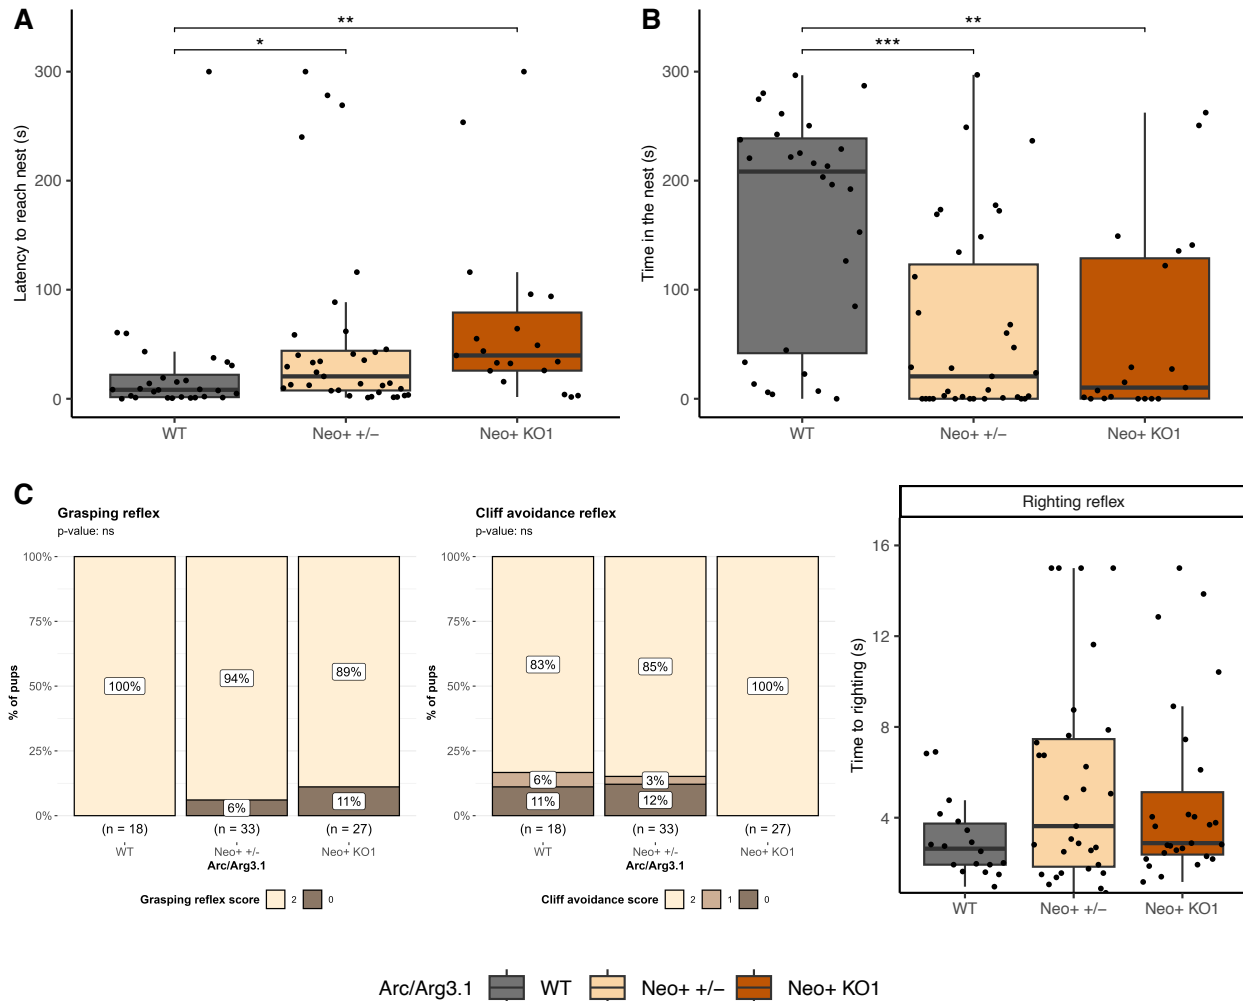

**Figure S6. Neo<sup>+</sup> KO1 pups exhibit social communication impairments, but no motor deficits**

In the olfactory-based homing test, Neo<sup>+</sup> KO1 (brown; n = 19) and Neo<sup>+</sup> *Arc/Arg3.1*<sup>+/-</sup> pups (beige; n = 35) showed significantly increased latency to reach the “nest area” (litter from their home cage) (A) and spend less time in it compared to WT (dark gray; n = 28) pups (B). When testing their reflexes, Neo<sup>+</sup> KO1 (n = 27) and Neo<sup>+</sup> *Arc/Arg3.1*<sup>+/-</sup> pups (n = 33) displayed no difference in the grasping reflex, cliff avoidance reflex, or time to righting compared to WT pups (n = 18) (C). Data are presented as mean ± sd in **Table S3**. Groups in A, B, and C (right) were compared by Kruskal-Wallis test followed by Dunn’s post-hoc test or by Fisher’s exact test in C (left and center), with an asterisk indicating genotype effects (p = P adjusted). \* p < 0.05; \*\* p < 0.01; \*\*\* p < 0.001; ns, not significant.

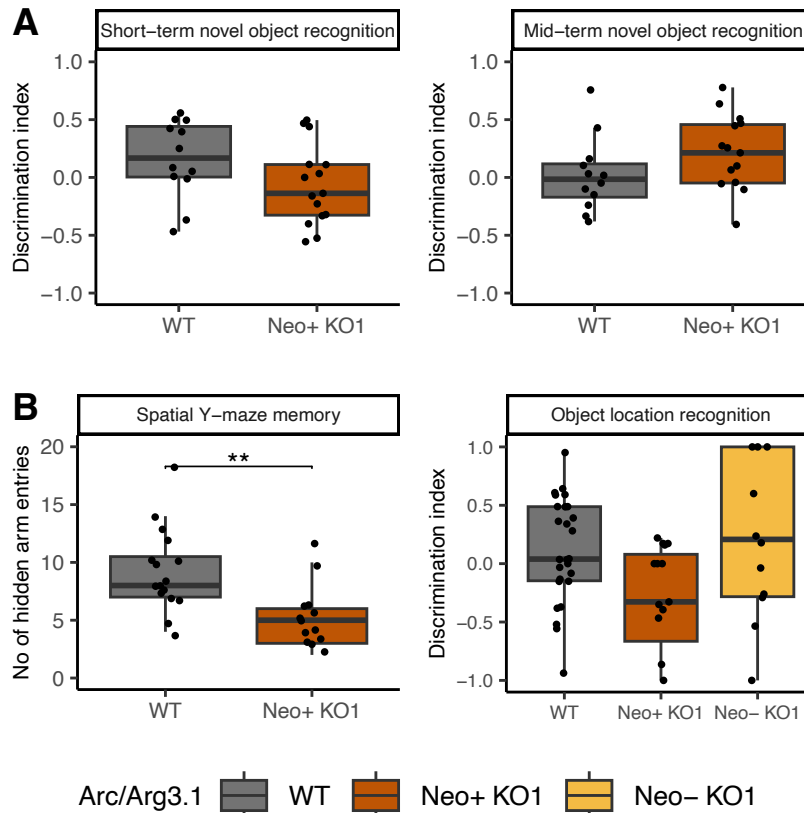

**Figure S7. Neo<sup>+</sup> KO1 mice display mild spatial short-term memory impairments, which are absent in Neo<sup>-</sup> KO1 mice**

In the novel object recognition test, Neo<sup>+</sup> KO1 mice (brown; n = 8 females and 7 males) showed no difference in the index to discriminate between a novel and an old object when testing their short-term or mid-term recognition memory compared to WT (dark gray; n = 8 females and 4 males) (A). In the spatial Y-maze memory assay, Neo<sup>+</sup> KO1 mice (brown; n = 6 females and 7 males) showed a reduced number of entries in the arm hidden in the habituation phase compared to WT (dark gray; n = 8 females and 8 males). In the object location recognition test, Neo<sup>+</sup> KO1 mice (brown; n = 8 females and 7 males) displayed a reduced index to discriminate between an object that changed its location and the one that did not, compared to WT (dark gray; n = 16 females and 12 males), which was not the case for Neo<sup>-</sup> KO1 mice (yellow; n = 8 females and 8 males) (B). Data are presented as mean ± sd in Table S1. All groups were compared by the Kruskal-Wallis test followed by Dunn's post-hoc test, with an asterisk indicating genotype effects (p = P adjusted). \*p < 0.05; \*\*p < 0.01; \*\*\*p < 0.001.

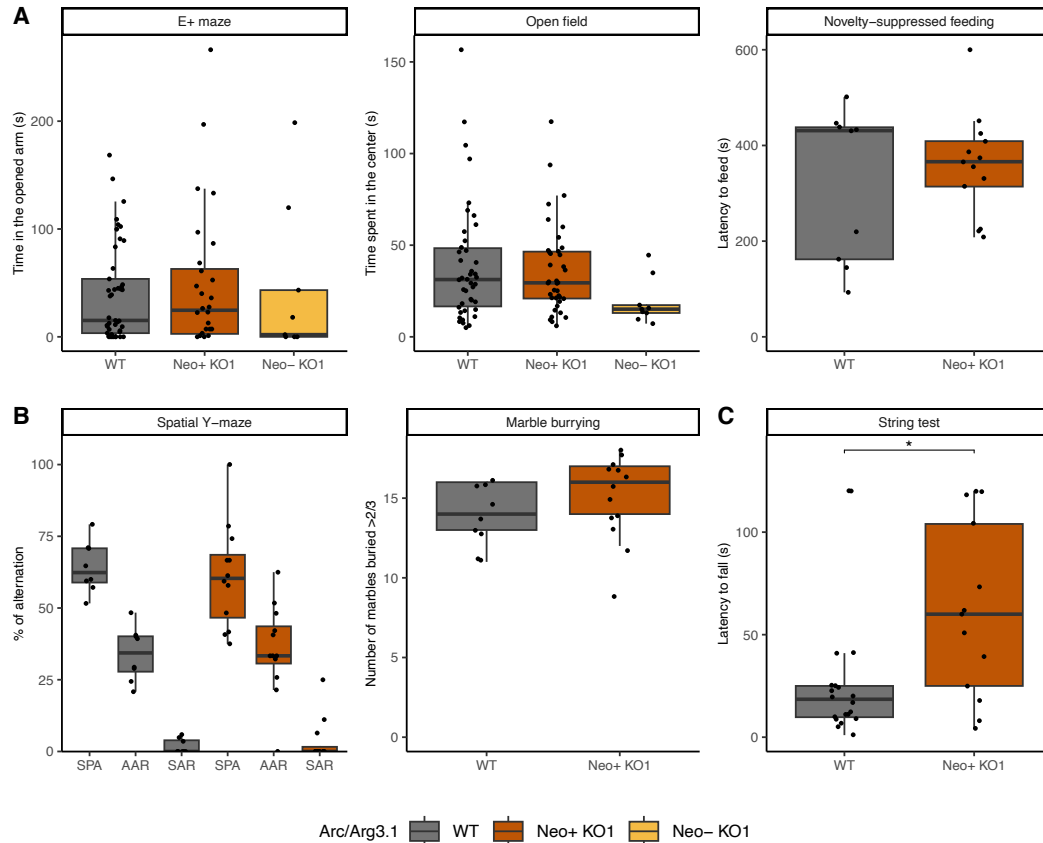

### Figure S8. Social behavior impairments of Neo<sup>+</sup> KO1 are not due to anxious-like behavior or motor impairments

Anxious-like behavior was evaluated in the elevated plus maze, open-field, and novelty-suppressed feeding tests (**A**). In the elevated plus maze test, Neo<sup>+</sup> KO1 mice (brown; *n* = 14 females and 14 males) showed no difference in the time spent in the open arms of the maze compared to WT (dark gray; *n* = 20 females and 25 males) or Neo<sup>-</sup> KO1 (yellow; *n* = 6 females and 3 males) mice (**A, left**). In the open-field test, Neo<sup>+</sup> KO1 mice (brown; *n* = 14 females and 24 males) displayed no difference in the time spent in the center of the open-field arena compared to WT (dark gray; *n* = 18 females and 24 males) or Neo<sup>-</sup> KO1 (yellow; *n* = 6 females and 3 males) mice (**A, center**). In the novelty-suppressed feeding test, Neo<sup>+</sup> KO1 mice (brown; *n* = 7 females and 6 males) displayed comparable food latency to WT mice (dark gray; *n* = 4 females and 5 males) (**A, right**). Perseverative behavior was tested in the spatial Y-maze task, where Neo<sup>+</sup> KO1 mice (brown; *n* = 6 females and 6 males) showed no difference in the percentage of alternation compared to WT (dark gray; *n* = 4 females and 4 males; **B, left**), and compulsive behavior in the marble-burying test, in which Neo<sup>+</sup> KO1 mice (brown; *n* = 7 females and 6 males) showed no difference in the number of marbles buried (>2/3) compared to WT (dark gray; *n* = 4 females and 5 males) (**B, right**). In the string test assessing motor coordination, Neo<sup>+</sup> KO1 mice (brown; *n* = 9 females and 4 males) displayed increased latency to fall from the string compared to WT (dark gray; *n* = 10 males and 10 females; **C**). Data are presented as mean ± sd in **Table S1**. All groups were compared by the Kruskal-Wallis test followed by Dunn's post-hoc test, with an asterisk indicating genotype effects (*p* = *P* adjusted). \**p* < 0.05; \*\**p* < 0.01; \*\*\**p* < 0.001.

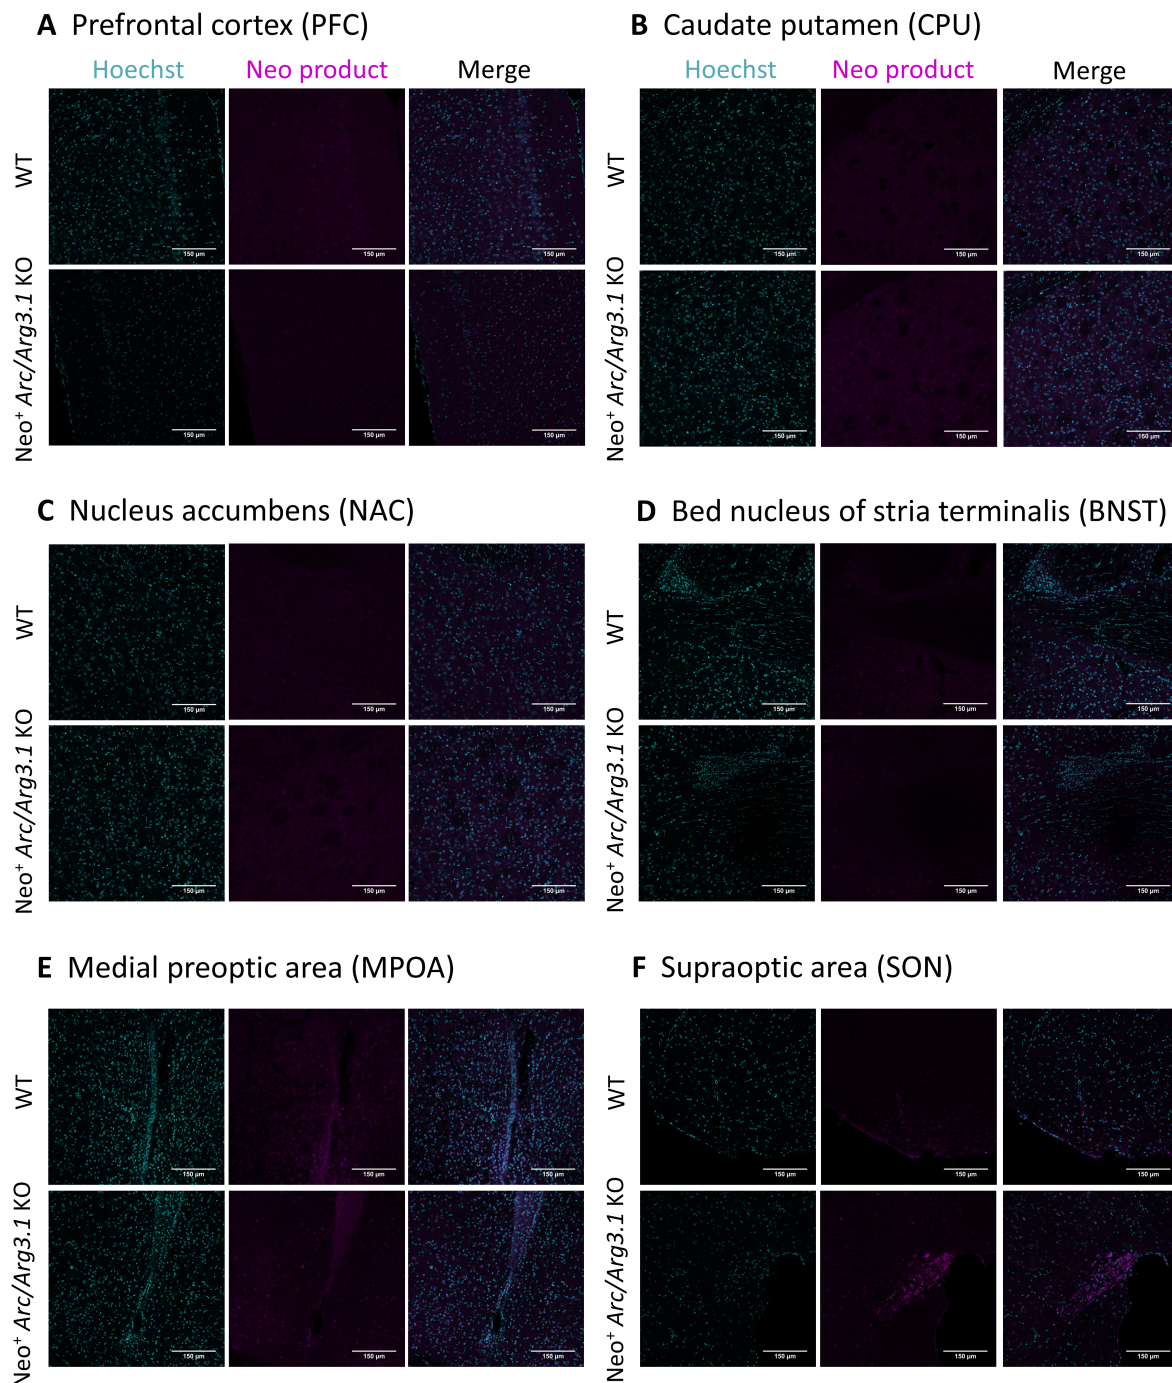

**Figure S9. Neo protein product is not detected in brain structures other than the PVN**

Aminoglycoside phosphotransferase coded by the Neo cassette (Neo product) was not detected at the protein level in the PFC (A), CPU (B), NAC (C), or BNST (D) of WT or Neo<sup>+</sup> KO1 dams, while a non-specific signal in WT and Neo<sup>+</sup> KO1 dams was observed in the MPOA (E) and SON (F). Scale bars = 150 μm. PFC, prefrontal cortex; NAC, nucleus accumbens; CPU, caudate putamen; BNST, bed nucleus of stria terminalis; MPOA, medial preoptic area; PVN, paraventricular nucleus of the hypothalamus; SON, supraoptic nucleus.

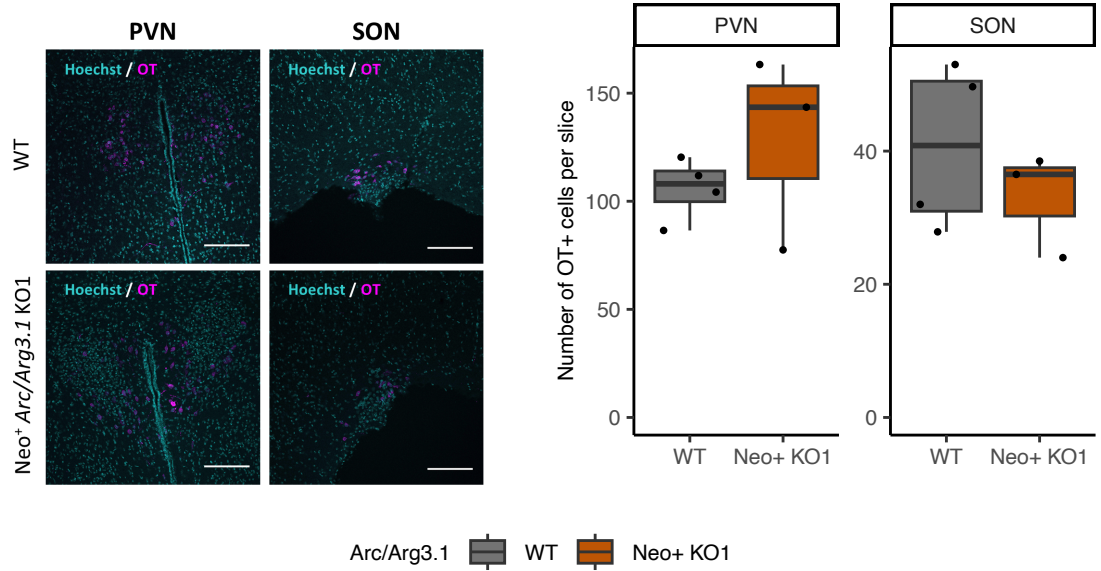

**Figure S10. Neomycin cassette does not affect the number of oxytocinergic neurons in the PVN and SON**

The number of oxytocinergic (OT) neurons in the PVN and SON was comparable between Neo<sup>+</sup> KO1 (brown; n = 3) and WT dams (dark gray; n = 4) as shown by representative images (scale bars = 150  $\mu$ m) and cellular quantification. PVN, paraventricular nucleus of the hypothalamus; SON, supraoptic nucleus. Groups were compared by the Kruskal-Wallis test, followed by Dunn's post-hoc test, with an asterisk indicating genotype effects ( $p = P$  adjusted). \* $p < 0.05$ ; \*\* $p < 0.01$ ; \*\*\* $p < 0.001$ .

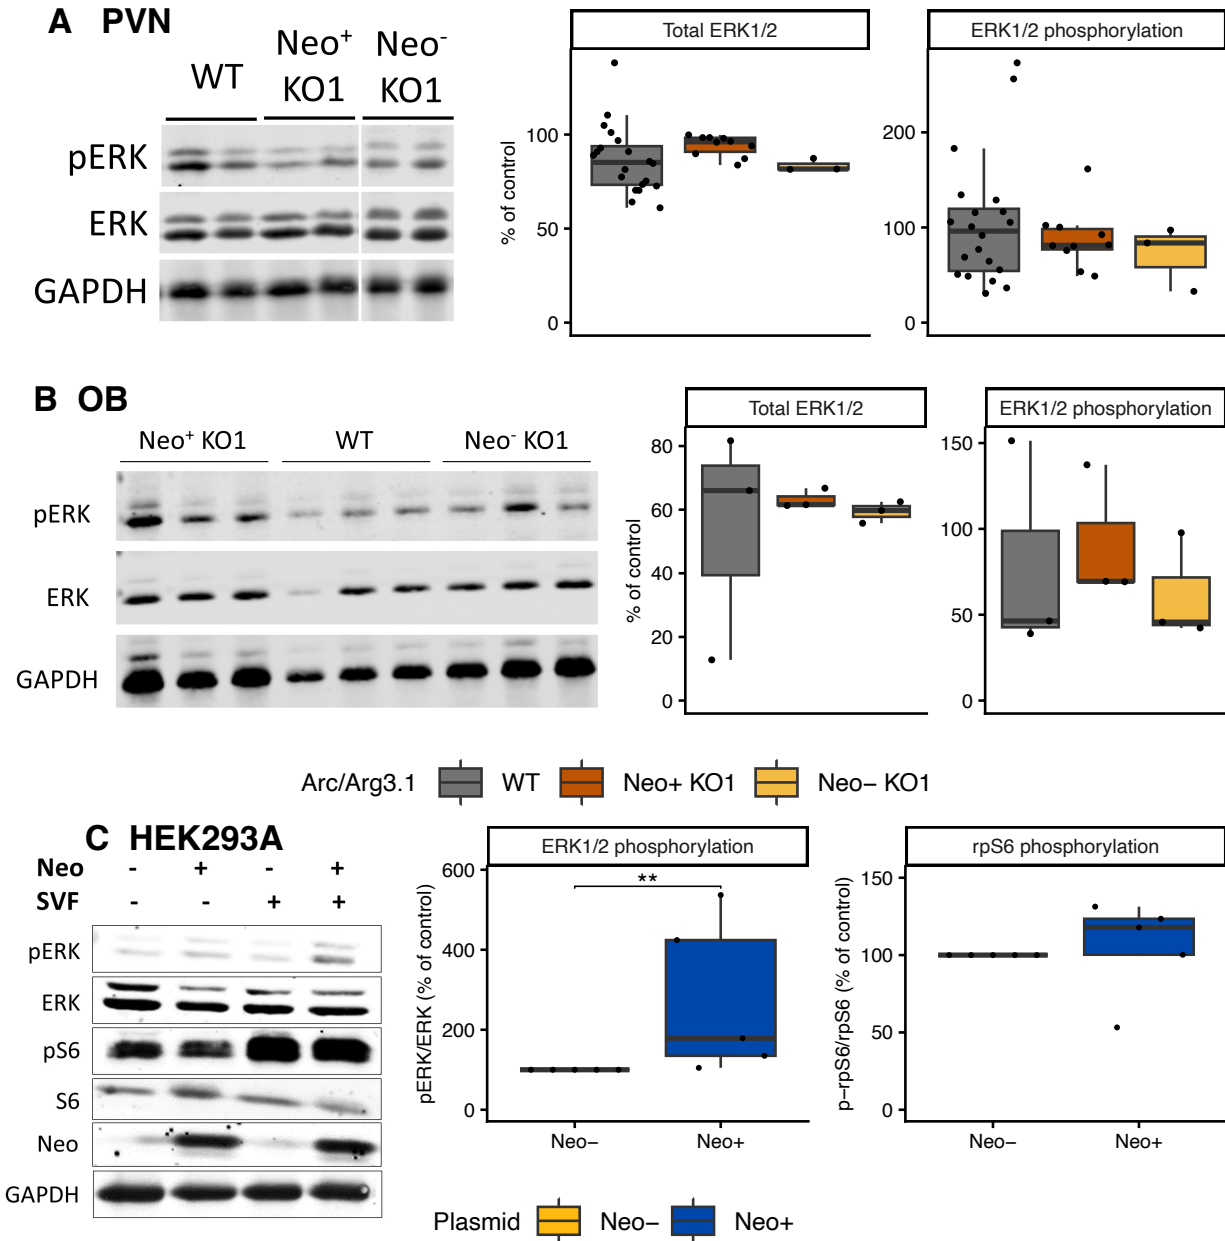

**Figure S11. Neomycin cassette enhances ERK1/2 signaling in HEK293 cells, but not in Neo<sup>+</sup> KO1 males or olfactory bulb**

Neo<sup>+</sup> KO1 males displayed tendency to increased total ERK1/2 levels compared to WT (brown; n = 10), or Neo<sup>-</sup> KO1 males (yellow; n = 3) in the PVN (A), but not in the olfactory bulb (OB; B). The expression of the Neo product in HEK293 cells transfected with Neo<sup>+</sup> plasmid (dark blue) induced increased phosphorylated ERK1/2, but not rpS6, compared to HEK293 cells transfected with Neo<sup>-</sup> plasmid (yellow; n = 5 per condition; C). Data are presented as a representative blot (left) and protein quantification (right) with mean ± standard deviation (Table S4). Groups were compared by the Kruskal-Wallis test followed by Dunn's post-hoc test, with an asterisk indicating genotype or Neo<sup>+</sup> effects (p = P adjusted). \* or #p < 0.05; \*\* or ##p < 0.01; \*\*\* or ###p < 0.001.

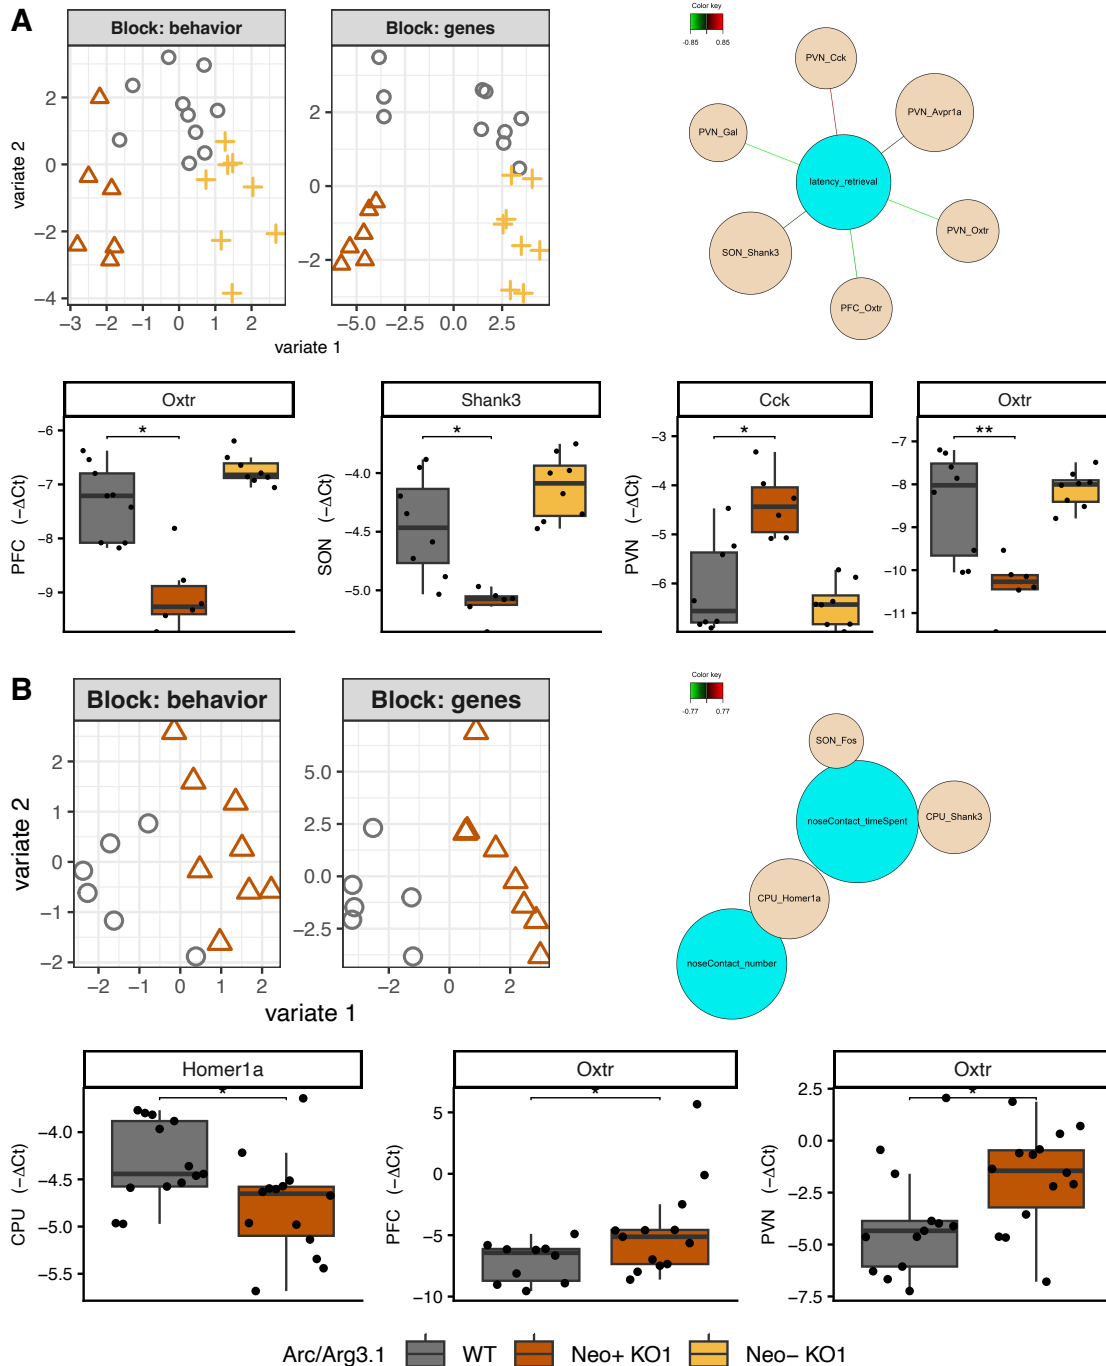

**Figure S12. Integration of neomycin-induced maternal and social interaction impairments in *Neo*<sup>+</sup> *Arc/Arg3.1* KO1 mice to gene dysregulation**

**(A)** Integration of maternal behavior and motor stereotypies with gene expression from the oxytocin family, immediate early genes, ASD-associated and neuropeptide genes revealed a clear separation of *Neo*<sup>+</sup> KO1 dams (brown triangles; n = 6) from WT (dark gray circles; n = 10) and *Neo*<sup>-</sup> KO1 (yellow crosses; n = 8) dams, while network analysis revealed strong positive correlations between pup retrieval latency and genes that were significantly dysregulated in *Neo*<sup>+</sup> KO1 dams compared to WT and *Neo*<sup>-</sup> KO1. **(B)** Integration of social interaction with unfamiliar conspecifics

with gene expression from the oxytocin family, immediate early genes, ASD-associated and neuropeptide genes revealed a clear separation of Neo<sup>+</sup> KO1 sexually naïve mice (brown triangles; n = 4 females and 4 males) from WT mice (dark gray circles; n = 4 females and 2 males) on both behavior and gene expression. While network analysis revealed strong correlations between time and number of nose contacts, including *Homer1a* in the CPU. The expression of *Homer1a* in the CPU showed dysregulation in the Neo<sup>+</sup> KO1 naïve mice compared to WT, along with significant dysregulation of *Oxtr* expression in the PFC and PVN. Data are presented as mean ± standard deviation (**Tables S1-S2 S5**), compared by the Kruskal-Wallis test followed by Dunn's post-hoc test, with asterisk indicating genotype effects (p = P adjusted). \*p < 0.05; \*\*p < 0.01; \*\*\*p < 0.001. PFC, prefrontal cortex; CPU, caudate putamen; PVN, paraventricular nucleus of the hypothalamus; SON, supraoptic nucleus.

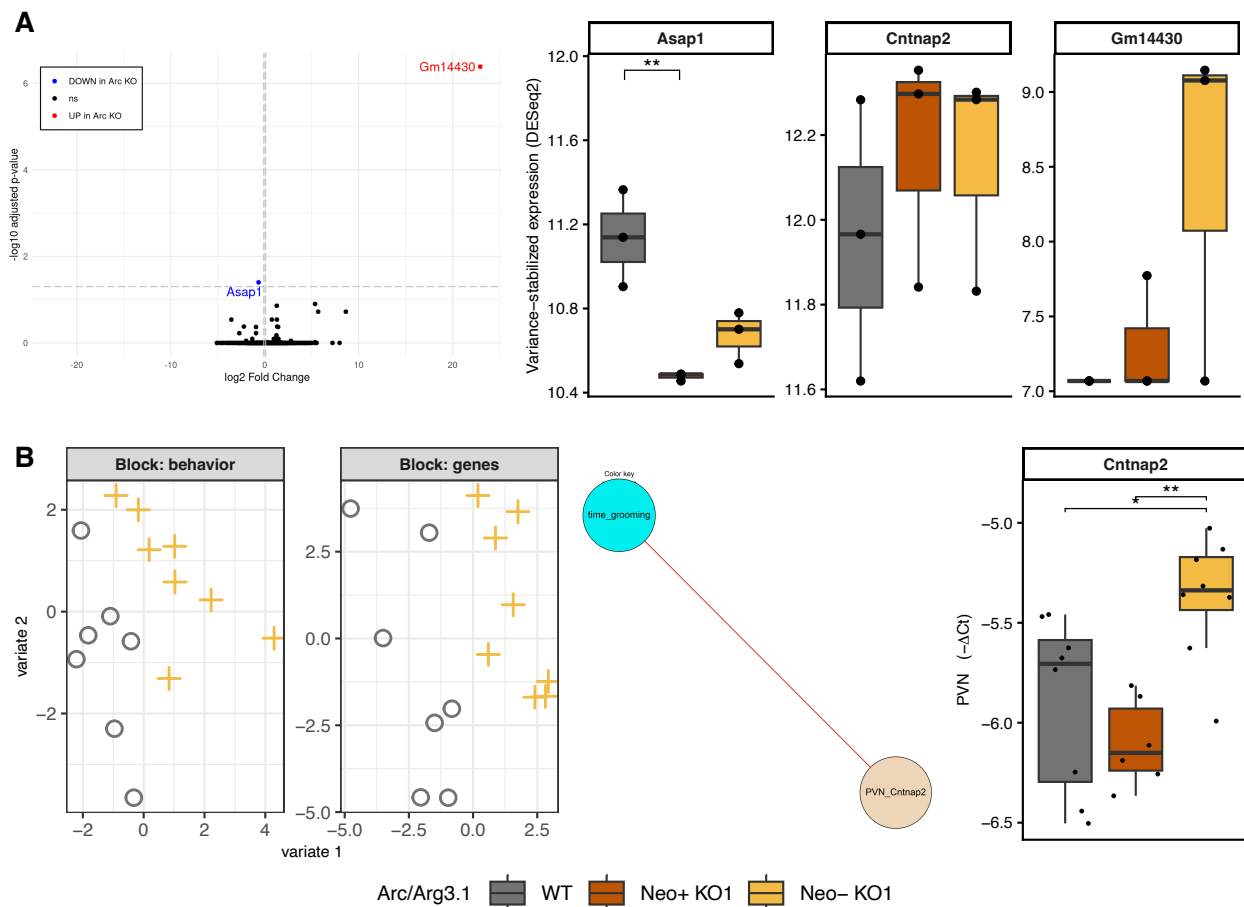

### Figure S13. Effect of *Arc/Arg3.1* deletion on gene expression

To isolate the effect of *Arc/Arg3.1* deletion, differential expression in the PVN was analyzed by RNA sequencing in WT (gray), Neo<sup>+</sup> KO1 (brown) and Neo<sup>-</sup> KO1 (yellow) females (n = 3 per genotype; **A**). Volcano and bar plot analyses revealed minimal transcriptional changes, with only *Asap1* down-regulated gene and *Gm14430* up-regulated. Integration of behavioral parameters (maternal behavior, social interaction and motor stereotypies) with gene expression profiles from the oxytocin family, immediate early genes, ASD-associated and neuropeptide genes showed no clear separation between WT (dark gray circles; n = 10) and Neo<sup>-</sup> KO1 (yellow crosses; n = 8) dams, but a potential positive correlation between time spent in self-grooming and upregulated *Cntnap2* expression (**B**). Data are presented as mean  $\pm$  standard deviation (**Tables S1-S2 S5**), compared by the Kruskal-Wallis test followed by Dunn's post-hoc test, with asterisk indicating genotype effects ( $p = P$  adjusted). \* $p < 0.05$ ; \*\* $p < 0.01$ ; \*\*\* $p < 0.001$ . PFC, prefrontal cortex; CPU, caudate putamen; PVN, paraventricular nucleus of the hypothalamus; SON, supraoptic nucleus.

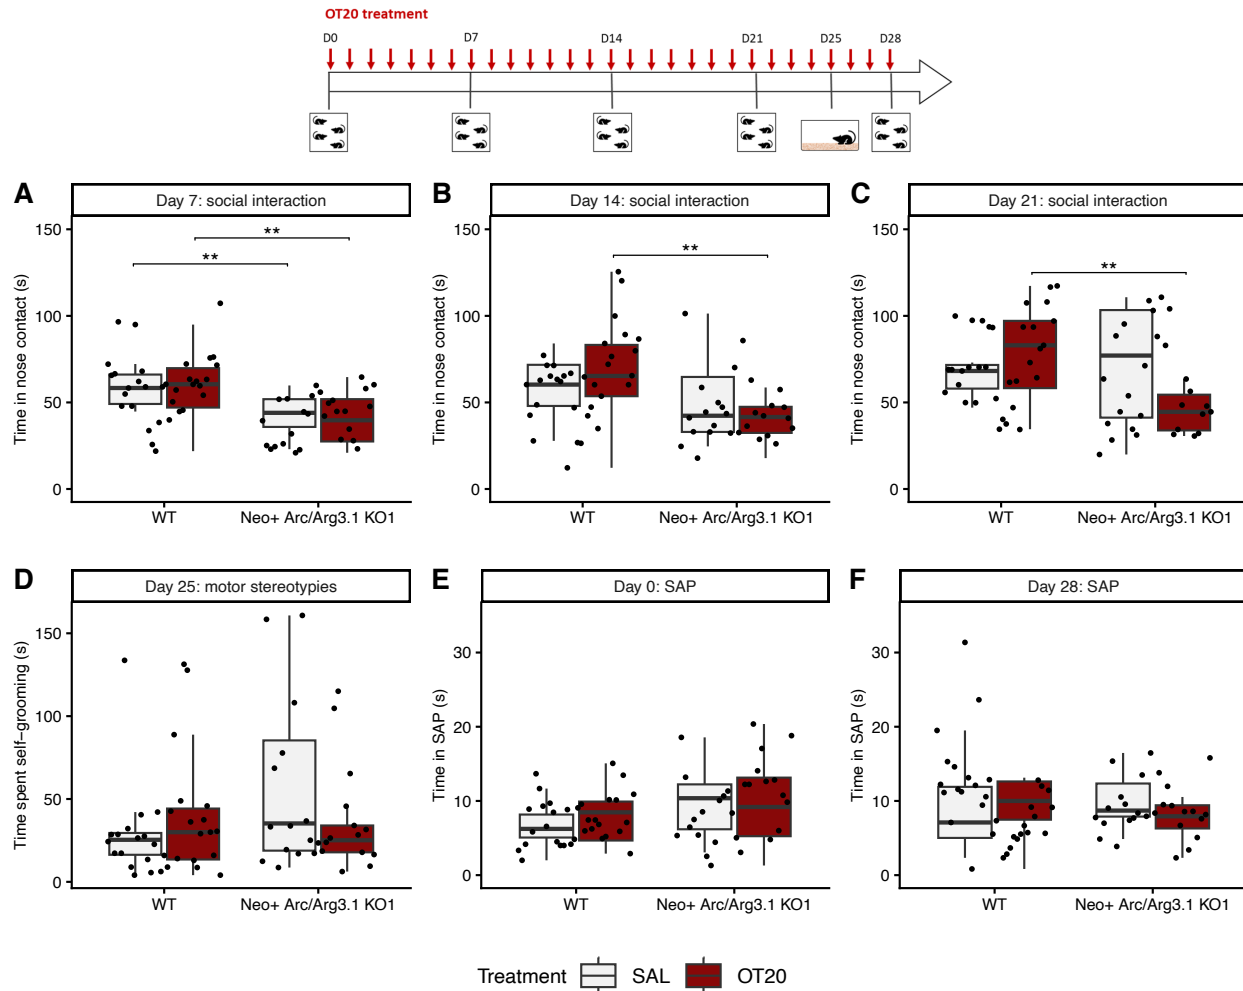

**Figure S14. Subchronic oxytocin administration does not improve social interaction impairments, stereotyped or anxious-like behaviors**

After 7 days of intranasal administration, both saline (SAL; light gray; n = 8 females and 4 males) and oxytocin (OT)-treated Neo<sup>+</sup> KO1 mice at 20 μg kg<sup>-1</sup> (red; n = 10 females and 6 males) displayed reduced social interaction with unfamiliar treatment-matched conspecifics, compared to the SAL-treated (light gray; n = 7 females and 8 males) and OT-treated WT controls (red; n = 8 females and 11 males; **A**). On day 14, OT-treated Neo<sup>+</sup> KO1 mice showed significantly reduced social interaction compared to OT-treated WT control (**B**). On day 21, OT-treated Neo<sup>+</sup> KO1 mice **still** displayed reduced social interaction compared to OT-treated WT (**C**). In the motor stereotypy test at day 25, no difference in the time spent self-grooming was observed between Neo<sup>+</sup> KO1 (SAL, n = 8 females and 4 males; OT, n = 11 females and 6 males) compared to WT (SAL, n = 8 females and 8 males; OT, n = 8 females and 11 males; **D**). No difference in the time spent in stretch-attend posture (SAP), a measure of anxious-like behavior, was observed **at day 0** (**E**) or day 28 (**F**). Data are presented as mean ± sd in **Table S2**. All groups were compared by the Kruskal-Wallis test followed by Dunn’s post-hoc test, with an asterisk indicating genotype effects and ladder treatment effects (p = P adjusted). \* or #p < 0.05; \*\* or ##p < 0.01; \*\*\* or ###p < 0.001.

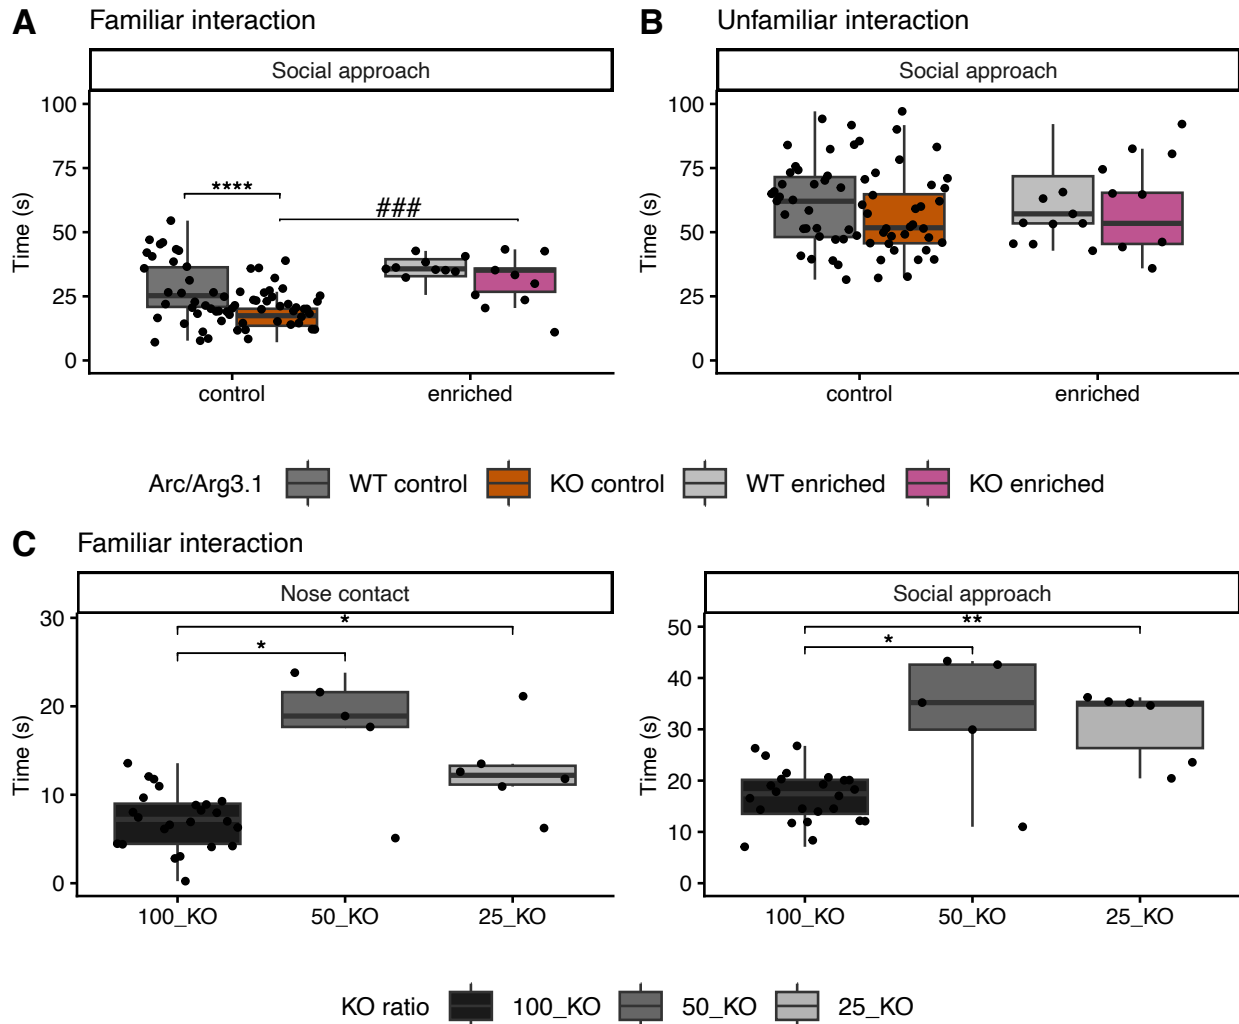

**Figure S15.  $Neo^+$  Arc/Arg3.1 KO1 mice raised in an enriched social environment display increased social interaction**

Both  $Neo^+$  KO1 mice (KO enriched; pink;  $n = 12$ ) and WT mice (WT enriched; light gray;  $n = 9$ ) raised in an enriched social environment with a mix of WT, heterozygous and  $Neo^+$  KO1 littermates displayed enhanced social approach with familiar littermates (**A**), but not unfamiliar animals (**B**), compared to  $Neo^+$  KO1 mice (KO control; brown;  $n = 24$ ) and WT mice (WT control; dark gray;  $n = 41$ ) raised with the sex-, genotype-matched animals. This effect was present in  $Neo^+$  KO1 mice raised in 50% (50\_KO; dark gray;  $n = 5$ ) or 25% (25\_KO; light gray;  $n = 6$ ) KO1 genotype ratio over the total number of mice per cage, compared to  $Neo^+$  KO1 mice raised only with KO1 animals (100\_KO; black;  $n = 24$ ). Data are presented as mean  $\pm$  sd in **Table S2**. All groups were compared by the Kruskal-Wallis test followed by Dunn's post-hoc test, with an asterisk indicating genotype effects. \* or #  $p < 0.05$ ; \*\* or ##  $p < 0.01$ ; \*\*\* or ###  $p < 0.001$ .

## SUPPLEMENTARY TABLES

**Table S1. Mean and statistics of behavioral tests in adult mice**

| var_s1         | genotype      | line          | pup_genotyp | n  | n_females | n_males | mean       | sd         |
|----------------|---------------|---------------|-------------|----|-----------|---------|------------|------------|
| delivery_laten | Neo+ Arc KO   | Neo+ Arc      | +/-         | 14 | 14        | 14      | 20,7142857 | 1,38278267 |
| delivery_laten | Neo+ Arc KO   | Neo+ Arc      | KO          | 15 | 15        | 15      | 21,6666667 | 1,29099445 |
| delivery_laten | Neo- Arc Bl6J | Neo- Arc Bl6J | KO          | 7  | 7         | 7       | NA         | NA         |
| delivery_laten | Neo- Arc KO   | Neo- Arc      | +/-         | 7  | 7         | 7       | 20,7142857 | 1,38013112 |
| delivery_laten | Neo- Arc KO   | Neo- Arc      | KO          | 8  | 8         | 8       | 21,375     | 0,91612538 |
| delivery_laten | WT 1          | Neo+ Arc      | +/-         | 10 | 10        | 10      | 21,2       | 1,75119007 |
| delivery_laten | WT 1          | Neo+ Arc      | WT          | 14 | 14        | 14      | 21,9285714 | 2,09263491 |
| delivery_laten | WT 2          | Neo- Arc      | +/-         | 8  | 8         | 8       | 22,75      | 4,68279526 |
| delivery_laten | WT 2          | Neo- Arc      | WT          | 7  | 7         | 7       | 21,4285714 | 0,97590007 |
| delivery_laten | WT Bl6J       | Neo- Arc Bl6J | WT          | 6  | 6         | 6       | NA         | NA         |
| delivery_laten | NA            | Neo+ Arc      | +/-         | 15 | 15        | 15      | 22,8666667 | 4,12079512 |
| duration_croi  | Neo+ Arc KO   | Neo+ Arc      | +/-         | 14 | 14        | 14      | 34,3364286 | 42,2739889 |
| duration_croi  | Neo+ Arc KO   | Neo+ Arc      | KO          | 15 | 15        | 15      | 14,6365333 | 56,6870498 |
| duration_croi  | Neo- Arc Bl6J | Neo- Arc Bl6J | KO          | 7  | 7         | 7       | 0          | 0          |
| duration_croi  | Neo- Arc KO   | Neo- Arc      | +/-         | 7  | 7         | 7       | 14,8748571 | 19,2493451 |
| duration_croi  | Neo- Arc KO   | Neo- Arc      | KO          | 8  | 8         | 8       | 21,528     | 33,4219929 |
| duration_croi  | WT 1          | Neo+ Arc      | +/-         | 10 | 10        | 10      | 70,0606    | 49,4364414 |
| duration_croi  | WT 1          | Neo+ Arc      | WT          | 14 | 14        | 14      | 63,948     | 93,1498319 |
| duration_croi  | WT 2          | Neo- Arc      | +/-         | 8  | 8         | 8       | 19,044     | 26,5788724 |
| duration_croi  | WT 2          | Neo- Arc      | WT          | 7  | 7         | 7       | 9,11628571 | 10,7489169 |
| duration_croi  | WT Bl6J       | Neo- Arc Bl6J | WT          | 6  | 6         | 6       | 2,85433333 | 6,99166022 |
| duration_croi  | NA            | Neo+ Arc      | +/-         | 15 | 15        | 15      | 23,4942667 | 30,5824361 |
| duration_digg  | Neo+ Arc KO   | Neo+ Arc      | +/-         | 14 | 14        | 14      | 4,55928571 | 4,13536711 |
| duration_digg  | Neo+ Arc KO   | Neo+ Arc      | KO          | 15 | 15        | 15      | 2,9964     | 2,11139486 |
| duration_digg  | Neo- Arc Bl6J | Neo- Arc Bl6J | KO          | 7  | 7         | 7       | 3,3994     | 1,16500657 |
| duration_digg  | Neo- Arc KO   | Neo- Arc      | +/-         | 7  | 7         | 7       | 3,51742857 | 1,66514643 |
| duration_digg  | Neo- Arc KO   | Neo- Arc      | KO          | 8  | 8         | 8       | 2,032625   | 0,78458523 |
| duration_digg  | WT 1          | Neo+ Arc      | +/-         | 10 | 10        | 10      | 1,708      | 1,13136771 |
| duration_digg  | WT 1          | Neo+ Arc      | WT          | 14 | 14        | 14      | 2,17857143 | 1,61671227 |
| duration_digg  | WT 2          | Neo- Arc      | +/-         | 8  | 8         | 8       | 1,899625   | 1,25466808 |
| duration_digg  | WT 2          | Neo- Arc      | WT          | 7  | 7         | 7       | 1,98014286 | 1,51027563 |
| duration_digg  | WT Bl6J       | Neo- Arc Bl6J | WT          | 6  | 6         | 6       | 3,57666667 | 1,37732068 |
| duration_digg  | NA            | Neo+ Arc      | +/-         | 15 | 15        | 15      | 3,02953333 | 1,34882583 |
| duration_groc  | Neo+ Arc KO   | Neo+ Arc      | +/-         | 14 | 14        | 14      | 24,5305    | 26,612681  |
| duration_groc  | Neo+ Arc KO   | Neo+ Arc      | KO          | 15 | 15        | 15      | 13,8824    | 16,445013  |
| duration_groc  | Neo- Arc Bl6J | Neo- Arc Bl6J | KO          | 7  | 7         | 7       | 6,2406     | 2,42848014 |
| duration_groc  | Neo- Arc KO   | Neo- Arc      | +/-         | 7  | 7         | 7       | 16,3387143 | 9,4119908  |
| duration_groc  | Neo- Arc KO   | Neo- Arc      | KO          | 8  | 8         | 8       | 29,280875  | 21,0492997 |
| duration_groc  | WT 1          | Neo+ Arc      | +/-         | 10 | 10        | 10      | 18,3617    | 17,7182309 |
| duration_groc  | WT 1          | Neo+ Arc      | WT          | 14 | 14        | 14      | 20,3437857 | 16,617421  |
| duration_groc  | WT 2          | Neo- Arc      | +/-         | 8  | 8         | 8       | 15,812125  | 20,9977994 |
| duration_groc  | WT 2          | Neo- Arc      | WT          | 7  | 7         | 7       | 14,4734286 | 16,6236992 |
| duration_groc  | WT Bl6J       | Neo- Arc Bl6J | WT          | 6  | 6         | 6       | 7,85766667 | 9,84429079 |
| duration_groc  | NA            | Neo+ Arc      | +/-         | 15 | 15        | 15      | 12,7756667 | 11,4954445 |
| duration_insi  | Neo+ Arc KO   | Neo+ Arc      | +/-         | 14 | 14        | 14      | 45,5151429 | 28,8607264 |
| duration_insi  | Neo+ Arc KO   | Neo+ Arc      | KO          | 15 | 15        | 15      | 81,0774667 | 140,390426 |
| duration_insi  | Neo- Arc Bl6J | Neo- Arc Bl6J | KO          | 7  | 7         | 7       | 8,0426     | 4,39620709 |
| duration_insi  | Neo- Arc KO   | Neo- Arc      | +/-         | 7  | 7         | 7       | 32,269     | 23,0278692 |
| duration_insi  | Neo- Arc KO   | Neo- Arc      | KO          | 8  | 8         | 8       | 47,76925   | 35,4378983 |
| duration_insi  | WT 1          | Neo+ Arc      | +/-         | 10 | 10        | 10      | 90,032     | 63,8720853 |
| duration_insi  | WT 1          | Neo+ Arc      | WT          | 14 | 14        | 14      | 59,081292  | 39,2301924 |
| duration_insi  | WT 2          | Neo- Arc      | +/-         | 8  | 8         | 8       | 34,14325   | 24,4164517 |
| duration_insi  | WT 2          | Neo- Arc      | WT          | 7  | 7         | 7       | 39,5987143 | 28,851265  |
| duration_insi  | WT Bl6J       | Neo- Arc Bl6J | WT          | 6  | 6         | 6       | 15,2618333 | 12,1646901 |
| duration_insi  | NA            | Neo+ Arc      | +/-         | 15 | 15        | 15      | 58,624     | 51,4952065 |
| duration_nest  | Neo+ Arc KO   | Neo+ Arc      | +/-         | 14 | 14        | 14      | 14,2894286 | 12,1753351 |
| duration_nest  | Neo+ Arc KO   | Neo+ Arc      | KO          | 15 | 15        | 15      | 6,94493333 | 8,93768888 |
| duration_nest  | Neo- Arc Bl6J | Neo- Arc Bl6J | KO          | 7  | 7         | 7       | 5,858      | 7,11837734 |
| duration_nest  | Neo- Arc KO   | Neo- Arc      | +/-         | 7  | 7         | 7       | 3,507      | 5,15731396 |
| duration_nest  | Neo- Arc KO   | Neo- Arc      | KO          | 8  | 8         | 8       | 9,739125   | 5,78894645 |
| duration_nest  | WT 1          | Neo+ Arc      | +/-         | 10 | 10        | 10      | 19,2613    | 8,05691686 |
| duration_nest  | WT 1          | Neo+ Arc      | WT          | 14 | 14        | 14      | 14,2789286 | 5,65803102 |
| duration_nest  | WT 2          | Neo- Arc      | +/-         | 8  | 8         | 8       | 11,278625  | 8,56057408 |
| duration_nest  | WT 2          | Neo- Arc      | WT          | 7  | 7         | 7       | 10,6685714 | 5,47197283 |
| duration_nest  | WT Bl6J       | Neo- Arc Bl6J | WT          | 6  | 6         | 6       | 4,871      | 6,01696016 |
| duration_nest  | NA            | Neo+ Arc      | +/-         | 15 | 15        | 15      | 12,3451333 | 5,06830338 |
| duration_out:  | Neo+ Arc KO   | Neo+ Arc      | +/-         | 14 | 14        | 14      | 50,1244235 | 48,5494187 |
| duration_out:  | Neo+ Arc KO   | Neo+ Arc      | KO          | 15 | 15        | 15      | 69,5014667 | 56,1736868 |
| duration_out:  | Neo- Arc Bl6J | Neo- Arc Bl6J | KO          | 7  | 7         | 7       | 41,2322    | 16,0848155 |

|                              |               |     |    |    |   |            |            |
|------------------------------|---------------|-----|----|----|---|------------|------------|
| delivery_laten Neo+ Arc KO   | Neo+ Arc      | +/- | 14 | 14 | 0 | 20,7142857 | 1,38278267 |
| delivery_laten Neo+ Arc KO   | Neo+ Arc      | KO  | 15 | 15 | 0 | 21,6666667 | 1,29099445 |
| delivery_laten Neo- Arc Bl6J | Neo- Arc Bl6J | KO  | 7  | 7  | 0 | NA         | NA         |
| delivery_laten Neo- Arc KO   | Neo- Arc      | +/- | 7  | 7  | 0 | 20,7142857 | 1,38013112 |
| delivery_laten Neo- Arc KO   | Neo- Arc      | KO  | 8  | 8  | 0 | 21,375     | 0,91612538 |
| delivery_laten WT 1          | Neo+ Arc      | +/- | 10 | 10 | 0 | 21,2       | 1,75119007 |
| delivery_laten WT 1          | Neo+ Arc      | WT  | 14 | 14 | 0 | 21,9285714 | 2,09263491 |
| delivery_laten WT 2          | Neo- Arc      | +/- | 8  | 8  | 0 | 22,75      | 4,68279526 |
| delivery_laten WT 2          | Neo- Arc      | WT  | 7  | 7  | 0 | 21,4285714 | 0,97590007 |
| delivery_laten WT Bl6J       | Neo- Arc Bl6J | WT  | 6  | 6  | 0 | NA         | NA         |
| delivery_laten NA            | Neo+ Arc      | +/- | 15 | 15 | 0 | 22,8666667 | 4,12079512 |
| duration_croi Neo+ Arc KO    | Neo+ Arc      | +/- | 14 | 14 | 0 | 34,3364286 | 42,2739889 |
| duration_croi Neo+ Arc KO    | Neo+ Arc      | KO  | 15 | 15 | 0 | 14,6365333 | 56,6870498 |
| duration_croi Neo- Arc Bl6J  | Neo- Arc Bl6J | KO  | 7  | 7  | 0 | 0          | 0          |
| duration_croi Neo- Arc KO    | Neo- Arc      | +/- | 7  | 7  | 0 | 14,8748571 | 19,2493451 |
| duration_croi Neo- Arc KO    | Neo- Arc      | KO  | 8  | 8  | 0 | 21,528     | 33,4219929 |
| duration_croi WT 1           | Neo+ Arc      | +/- | 10 | 10 | 0 | 70,0606    | 49,4364414 |
| duration_croi WT 1           | Neo+ Arc      | WT  | 14 | 14 | 0 | 63,948     | 93,1498319 |
| duration_croi WT 2           | Neo- Arc      | +/- | 8  | 8  | 0 | 19,044     | 26,5788724 |
| duration_croi WT 2           | Neo- Arc      | WT  | 7  | 7  | 0 | 9,11628571 | 10,7489169 |
| duration_croi WT Bl6J        | Neo- Arc Bl6J | WT  | 6  | 6  | 0 | 2,85433333 | 6,99166022 |
| duration_croi NA             | Neo+ Arc      | +/- | 15 | 15 | 0 | 23,4942667 | 30,5824361 |
| duration_digg Neo+ Arc KO    | Neo+ Arc      | +/- | 14 | 14 | 0 | 4,55928571 | 4,13536711 |
| duration_digg Neo+ Arc KO    | Neo+ Arc      | KO  | 15 | 15 | 0 | 2,9964     | 2,11139486 |
| duration_digg Neo- Arc Bl6J  | Neo- Arc Bl6J | KO  | 7  | 7  | 0 | 3,3994     | 1,16500657 |
| duration_digg Neo- Arc KO    | Neo- Arc      | +/- | 7  | 7  | 0 | 3,51742857 | 1,66514643 |
| duration_digg Neo- Arc KO    | Neo- Arc      | KO  | 8  | 8  | 0 | 2,032625   | 0,78458523 |
| duration_digg WT 1           | Neo+ Arc      | +/- | 10 | 10 | 0 | 1,708      | 1,13136771 |
| duration_digg WT 1           | Neo+ Arc      | WT  | 14 | 14 | 0 | 2,17857143 | 1,61671227 |
| duration_digg WT 2           | Neo- Arc      | +/- | 8  | 8  | 0 | 1,899625   | 1,25466808 |
| duration_digg WT 2           | Neo- Arc      | WT  | 7  | 7  | 0 | 1,98014286 | 1,51027563 |
| duration_digg WT Bl6J        | Neo- Arc Bl6J | WT  | 6  | 6  | 0 | 3,57666667 | 1,37732068 |
| duration_digg NA             | Neo+ Arc      | +/- | 15 | 15 | 0 | 3,02953333 | 1,34882583 |
| duration_groc Neo+ Arc KO    | Neo+ Arc      | +/- | 14 | 14 | 0 | 24,5305    | 26,612681  |
| duration_groc Neo+ Arc KO    | Neo+ Arc      | KO  | 15 | 15 | 0 | 13,8824    | 16,445013  |
| duration_groc Neo- Arc Bl6J  | Neo- Arc Bl6J | KO  | 7  | 7  | 0 | 6,2406     | 2,42848014 |
| duration_groc Neo- Arc KO    | Neo- Arc      | +/- | 7  | 7  | 0 | 16,3387143 | 9,4119908  |
| duration_groc Neo- Arc KO    | Neo- Arc      | KO  | 8  | 8  | 0 | 29,280875  | 21,0492997 |
| duration_groc WT 1           | Neo+ Arc      | +/- | 10 | 10 | 0 | 18,3617    | 17,7182309 |
| duration_groc WT 1           | Neo+ Arc      | WT  | 14 | 14 | 0 | 20,3437857 | 16,617421  |
| duration_groc WT 2           | Neo- Arc      | +/- | 8  | 8  | 0 | 15,812125  | 20,9977994 |
| duration_groc WT 2           | Neo- Arc      | WT  | 7  | 7  | 0 | 14,4734286 | 16,6236992 |
| duration_groc WT Bl6J        | Neo- Arc Bl6J | WT  | 6  | 6  | 0 | 7,85766667 | 9,84429079 |
| duration_groc NA             | Neo+ Arc      | +/- | 15 | 15 | 0 | 12,7756667 | 11,4954445 |
| duration_insi Neo+ Arc KO    | Neo+ Arc      | +/- | 14 | 14 | 0 | 45,5151429 | 28,8607264 |
| duration_insi Neo+ Arc KO    | Neo+ Arc      | KO  | 15 | 15 | 0 | 81,0774667 | 140,390426 |
| duration_insi Neo- Arc Bl6J  | Neo- Arc Bl6J | KO  | 7  | 7  | 0 | 8,0426     | 4,39620709 |
| duration_insi Neo- Arc KO    | Neo- Arc      | +/- | 7  | 7  | 0 | 32,269     | 23,0278692 |
| duration_insi Neo- Arc KO    | Neo- Arc      | KO  | 8  | 8  | 0 | 47,76925   | 35,4378983 |
| duration_insi WT 1           | Neo+ Arc      | +/- | 10 | 10 | 0 | 90,032     | 63,8720853 |
| duration_insi WT 1           | Neo+ Arc      | WT  | 14 | 14 | 0 | 59,081292  | 39,2301924 |
| duration_insi WT 2           | Neo- Arc      | +/- | 8  | 8  | 0 | 34,14325   | 24,4164517 |
| duration_insi WT 2           | Neo- Arc      | WT  | 7  | 7  | 0 | 39,5987143 | 28,851265  |
| duration_insi WT Bl6J        | Neo- Arc Bl6J | WT  | 6  | 6  | 0 | 15,2618333 | 12,1646901 |
| duration_insi NA             | Neo+ Arc      | +/- | 15 | 15 | 0 | 58,624     | 51,4952065 |
| duration_nest Neo+ Arc KO    | Neo+ Arc      | +/- | 14 | 14 | 0 | 14,2894286 | 12,1753351 |
| duration_nest Neo+ Arc KO    | Neo+ Arc      | KO  | 15 | 15 | 0 | 6,94493333 | 8,93768888 |
| duration_nest Neo- Arc Bl6J  | Neo- Arc Bl6J | KO  | 7  | 7  | 0 | 5,858      | 7,11837734 |
| duration_nest Neo- Arc KO    | Neo- Arc      | +/- | 7  | 7  | 0 | 3,507      | 5,15731396 |
| duration_nest Neo- Arc KO    | Neo- Arc      | KO  | 8  | 8  | 0 | 9,739125   | 5,78894645 |
| duration_nest WT 1           | Neo+ Arc      | +/- | 10 | 10 | 0 | 19,2613    | 8,05691686 |
| duration_nest WT 1           | Neo+ Arc      | WT  | 14 | 14 | 0 | 14,2789286 | 5,65803102 |
| duration_nest WT 2           | Neo- Arc      | +/- | 8  | 8  | 0 | 11,278625  | 8,56057408 |
| duration_nest WT 2           | Neo- Arc      | WT  | 7  | 7  | 0 | 10,6685714 | 5,47197283 |
| duration_nest WT Bl6J        | Neo- Arc Bl6J | WT  | 6  | 6  | 0 | 4,871      | 6,01696016 |
| duration_nest NA             | Neo+ Arc      | +/- | 15 | 15 | 0 | 12,3451333 | 5,06830338 |
| duration_out: Neo+ Arc KO    | Neo+ Arc      | +/- | 14 | 14 | 0 | 50,1244235 | 48,5494187 |
| duration_out: Neo+ Arc KO    | Neo+ Arc      | KO  | 15 | 15 | 0 | 69,5014667 | 56,1736868 |
| duration_out: Neo- Arc Bl6J  | Neo- Arc Bl6J | KO  | 7  | 7  | 0 | 41,2322    | 16,0848155 |

|                               |               |     |    |    |   |            |            |
|-------------------------------|---------------|-----|----|----|---|------------|------------|
| duration_out: Neo- Arc KO     | Neo- Arc      | +/- | 7  | 7  | 0 | 54,8928571 | 50,5049868 |
| duration_out: Neo- Arc KO     | Neo- Arc      | KO  | 8  | 8  | 0 | 43,60725   | 21,5138352 |
| duration_out: WT 1            | Neo+ Arc      | +/- | 10 | 10 | 0 | 25,1518    | 6,01815278 |
| duration_out: WT 1            | Neo+ Arc      | WT  | 14 | 14 | 0 | 28,1217143 | 12,8984107 |
| duration_out: WT 2            | Neo- Arc      | +/- | 8  | 8  | 0 | 40,310625  | 14,414404  |
| duration_out: WT 2            | Neo- Arc      | WT  | 7  | 7  | 0 | 35,4047143 | 12,8151177 |
| duration_out: WT BI6J         | Neo- Arc BI6J | WT  | 6  | 6  | 0 | 93,837     | 75,9179541 |
| duration_out: NA              | Neo+ Arc      | +/- | 15 | 15 | 0 | 34,8614    | 12,1649883 |
| duration_sniff Neo+ Arc KO    | Neo+ Arc      | +/- | 14 | 14 | 0 | 2,81728571 | 1,64846639 |
| duration_sniff Neo+ Arc KO    | Neo+ Arc      | KO  | 15 | 15 | 0 | 1,5186     | 0,66922693 |
| duration_sniff Neo- Arc BI6J  | Neo- Arc BI6J | KO  | 7  | 7  | 0 | 1,1234     | 0,19610533 |
| duration_sniff Neo- Arc KO    | Neo- Arc      | +/- | 7  | 7  | 0 | 1,31785714 | 0,32918102 |
| duration_sniff Neo- Arc KO    | Neo- Arc      | KO  | 8  | 8  | 0 | 1,658375   | 0,5092347  |
| duration_sniff WT 1           | Neo+ Arc      | +/- | 10 | 10 | 0 | 3,3172     | 2,45504609 |
| duration_sniff WT 1           | Neo+ Arc      | WT  | 14 | 14 | 0 | 1,89957143 | 0,96987031 |
| duration_sniff WT 2           | Neo- Arc      | +/- | 8  | 8  | 0 | 1,474125   | 0,45435683 |
| duration_sniff WT 2           | Neo- Arc      | WT  | 7  | 7  | 0 | 1,69742857 | 0,42087166 |
| duration_sniff WT BI6J        | Neo- Arc BI6J | WT  | 6  | 6  | 0 | 1,2175     | 0,33614922 |
| duration_sniff NA             | Neo+ Arc      | +/- | 15 | 15 | 0 | 1,89973333 | 0,82459067 |
| latency_first Neo+ Arc KO     | Neo+ Arc      | +/- | 14 | 14 | 0 | 508,259    | 710,438842 |
| latency_first Neo+ Arc KO     | Neo+ Arc      | KO  | 15 | 15 | 0 | 1746,99173 | 205,300134 |
| latency_first Neo- Arc BI6J   | Neo- Arc BI6J | KO  | 7  | 7  | 0 | 614,532    | 770,842646 |
| latency_first Neo- Arc KO     | Neo- Arc      | +/- | 7  | 7  | 0 | 1047,49943 | 938,631766 |
| latency_first Neo- Arc KO     | Neo- Arc      | KO  | 8  | 8  | 0 | 108,31825  | 175,520585 |
| latency_first WT 1            | Neo+ Arc      | +/- | 10 | 10 | 0 | 76,0816    | 65,3032504 |
| latency_first WT 1            | Neo+ Arc      | WT  | 14 | 14 | 0 | 337,608143 | 633,190722 |
| latency_first WT 2            | Neo- Arc      | +/- | 8  | 8  | 0 | 84,4545    | 76,8883205 |
| latency_first WT 2            | Neo- Arc      | WT  | 7  | 7  | 0 | 508,515857 | 731,566559 |
| latency_first WT BI6J         | Neo- Arc BI6J | WT  | 6  | 6  | 0 | 433,2825   | 698,507788 |
| latency_first NA              | Neo+ Arc      | +/- | 15 | 15 | 0 | 370,4274   | 559,191086 |
| latency_fourth Neo+ Arc KO    | Neo+ Arc      | +/- | 14 | 14 | 0 | 900,420857 | 819,314783 |
| latency_fourth Neo+ Arc KO    | Neo+ Arc      | KO  | 15 | 15 | 0 | 1749,72833 | 194,701328 |
| latency_fourth Neo- Arc BI6J  | Neo- Arc BI6J | KO  | 7  | 7  | 0 | 625,1195   | 832,135994 |
| latency_fourth Neo- Arc KO    | Neo- Arc      | +/- | 7  | 7  | 0 | 1080,084   | 897,939897 |
| latency_fourth Neo- Arc KO    | Neo- Arc      | KO  | 8  | 8  | 0 | 223,62625  | 189,101967 |
| latency_fourth WT 1           | Neo+ Arc      | +/- | 10 | 10 | 0 | 487,0805   | 696,33888  |
| latency_fourth WT 1           | Neo+ Arc      | WT  | 14 | 14 | 0 | 623,678286 | 782,324132 |
| latency_fourth WT 2           | Neo- Arc      | +/- | 8  | 8  | 0 | 420,361286 | 614,582918 |
| latency_fourth WT 2           | Neo- Arc      | WT  | 7  | 7  | 0 | 582,737571 | 693,300279 |
| latency_fourth WT BI6J        | Neo- Arc BI6J | WT  | 6  | 6  | 0 | 643,721    | 842,29681  |
| latency_fourth NA             | Neo+ Arc      | +/- | 15 | 15 | 0 | 1066,63933 | 816,520903 |
| latency_full_n Neo+ Arc KO    | Neo+ Arc      | +/- | 14 | 14 | 0 | 1118,21429 | 646,301927 |
| latency_full_n Neo+ Arc KO    | Neo+ Arc      | KO  | 15 | 15 | 0 | 1764       | 139,4274   |
| latency_full_n Neo- Arc BI6J  | Neo- Arc BI6J | KO  | 7  | 7  | 0 | 1484,16667 | 574,929706 |
| latency_full_n Neo- Arc KO    | Neo- Arc      | +/- | 7  | 7  | 0 | 1425,71429 | 528,76766  |
| latency_full_n Neo- Arc KO    | Neo- Arc      | KO  | 8  | 8  | 0 | 866,875    | 717,997898 |
| latency_full_n WT 1           | Neo+ Arc      | +/- | 10 | 10 | 0 | 687        | 593,109508 |
| latency_full_n WT 1           | Neo+ Arc      | WT  | 14 | 14 | 0 | 913,076923 | 713,25702  |
| latency_full_n WT 2           | Neo- Arc      | +/- | 8  | 8  | 0 | 999,375    | 631,480333 |
| latency_full_n WT 2           | Neo- Arc      | WT  | 7  | 7  | 0 | 1046,14286 | 598,647762 |
| latency_full_n WT BI6J        | Neo- Arc BI6J | WT  | 6  | 6  | 0 | 1225,5     | 567,414751 |
| latency_full_n NA             | Neo+ Arc      | +/- | 15 | 15 | 0 | 1159,66667 | 734,203812 |
| latency_secon Neo+ Arc KO     | Neo+ Arc      | +/- | 14 | 14 | 0 | 661,2565   | 770,062331 |
| latency_secon Neo+ Arc KO     | Neo+ Arc      | KO  | 15 | 15 | 0 | 1749,33227 | 196,235287 |
| latency_secon Neo- Arc BI6J   | Neo- Arc BI6J | KO  | 7  | 7  | 0 | 714,953429 | 823,194034 |
| latency_secon Neo- Arc KO     | Neo- Arc      | +/- | 7  | 7  | 0 | 1054,88014 | 929,401609 |
| latency_secon Neo- Arc KO     | Neo- Arc      | KO  | 8  | 8  | 0 | 151,929375 | 168,142365 |
| latency_secon WT 1            | Neo+ Arc      | +/- | 10 | 10 | 0 | 214,3223   | 330,597659 |
| latency_secon WT 1            | Neo+ Arc      | WT  | 14 | 14 | 0 | 351,894429 | 627,091266 |
| latency_secon WT 2            | Neo- Arc      | +/- | 8  | 8  | 0 | 135,808125 | 98,8939187 |
| latency_secon WT 2            | Neo- Arc      | WT  | 7  | 7  | 0 | 530,143429 | 721,39132  |
| latency_secon WT BI6J         | Neo- Arc BI6J | WT  | 6  | 6  | 0 | 617,1535   | 835,435756 |
| latency_secon NA              | Neo+ Arc      | +/- | 15 | 15 | 0 | 411,556467 | 575,704536 |
| latency_sniffir Neo+ Arc KO   | Neo+ Arc      | +/- | 14 | 14 | 0 | 8,07521429 | 9,53074327 |
| latency_sniffir Neo+ Arc KO   | Neo+ Arc      | KO  | 15 | 15 | 0 | 9,1578     | 7,68663469 |
| latency_sniffir Neo- Arc BI6J | Neo- Arc BI6J | KO  | 7  | 7  | 0 | 4,5836     | 5,82663735 |
| latency_sniffir Neo- Arc KO   | Neo- Arc      | +/- | 7  | 7  | 0 | 12,3441429 | 7,28079534 |
| latency_sniffir Neo- Arc KO   | Neo- Arc      | KO  | 8  | 8  | 0 | 6,705625   | 3,17736912 |
| latency_sniffir WT 1          | Neo+ Arc      | +/- | 10 | 10 | 0 | 3,6092     | 1,17839163 |
| latency_sniffir WT 1          | Neo+ Arc      | WT  | 14 | 14 | 0 | 7,651      | 9,53321395 |

|                             |               |     |    |    |   |             |            |
|-----------------------------|---------------|-----|----|----|---|-------------|------------|
| latency_sniffir WT 2        | Neo- Arc      | +/- | 8  | 8  | 0 | 5,817125    | 4,26205495 |
| latency_sniffir WT 2        | Neo- Arc      | WT  | 7  | 7  | 0 | 5,68357143  | 5,2716977  |
| latency_sniffir WT Bl6J     | Neo- Arc Bl6J | WT  | 6  | 6  | 0 | 4,58316667  | 4,92603294 |
| latency_sniffir NA          | Neo+ Arc      | +/- | 15 | 15 | 0 | 4,83666667  | 2,3071591  |
| latency_third Neo+ Arc KO   | Neo+ Arc      | +/- | 14 | 14 | 0 | 812,215071  | 788,277613 |
| latency_third Neo+ Arc KO   | Neo+ Arc      | KO  | 15 | 15 | 0 | 1749,67427  | 194,910727 |
| latency_third Neo- Arc Bl6J | Neo- Arc Bl6J | KO  | 7  | 7  | 0 | 613,700167  | 831,762498 |
| latency_third Neo- Arc KO   | Neo- Arc      | +/- | 7  | 7  | 0 | 1061,43871  | 921,194414 |
| latency_third Neo- Arc KO   | Neo- Arc      | KO  | 8  | 8  | 0 | 172,082     | 168,769756 |
| latency_third WT 1          | Neo+ Arc      | +/- | 10 | 10 | 0 | 314,2894    | 529,117571 |
| latency_third WT 1          | Neo+ Arc      | WT  | 14 | 14 | 0 | 370,637643  | 618,982511 |
| latency_third WT 2          | Neo- Arc      | +/- | 8  | 8  | 0 | 158,731429  | 93,0009793 |
| latency_third WT 2          | Neo- Arc      | WT  | 7  | 7  | 0 | 560,028143  | 706,613229 |
| latency_third WT Bl6J       | Neo- Arc Bl6J | WT  | 6  | 6  | 0 | 634,428833  | 844,750444 |
| latency_third NA            | Neo+ Arc      | +/- | 15 | 15 | 0 | 812,538667  | 824,784859 |
| litter_size Neo+ Arc KO     | Neo+ Arc      | +/- | 14 | 14 | 0 | 6,57142857  | 1,28388148 |
| litter_size Neo+ Arc KO     | Neo+ Arc      | KO  | 15 | 15 | 0 | 7,8         | 1,93464652 |
| litter_size Neo- Arc Bl6J   | Neo- Arc Bl6J | KO  | 7  | 7  | 0 | 5,85714286  | 2,41029538 |
| litter_size Neo- Arc KO     | Neo- Arc      | +/- | 7  | 7  | 0 | 7,28571429  | 1,11269728 |
| litter_size Neo- Arc KO     | Neo- Arc      | KO  | 8  | 8  | 0 | 8           | 1,30930734 |
| litter_size WT 1            | Neo+ Arc      | +/- | 10 | 10 | 0 | 8,7         | 1,82878223 |
| litter_size WT 1            | Neo+ Arc      | WT  | 14 | 14 | 0 | 6,64285714  | 1,69193303 |
| litter_size WT 2            | Neo- Arc      | +/- | 8  | 8  | 0 | 6,625       | 2,82526863 |
| litter_size WT 2            | Neo- Arc      | WT  | 7  | 7  | 0 | 8,57142857  | 1,27241802 |
| litter_size WT Bl6J         | Neo- Arc Bl6J | WT  | 6  | 6  | 0 | 7,33333333  | 2,25092574 |
| litter_size NA              | Neo+ Arc      | +/- | 15 | 15 | 0 | 8,13333333  | 1,7674302  |
| number_crou Neo+ Arc KO     | Neo+ Arc      | +/- | 14 | 14 | 0 | 3,07142857  | 2,61546542 |
| number_crou Neo+ Arc KO     | Neo+ Arc      | KO  | 15 | 15 | 0 | 0,13333333  | 0,51639778 |
| number_crou Neo- Arc Bl6J   | Neo- Arc Bl6J | KO  | 7  | 7  | 0 | 0           | 0          |
| number_crou Neo- Arc KO     | Neo- Arc      | +/- | 7  | 7  | 0 | 3,57142857  | 5,68205194 |
| number_crou Neo- Arc KO     | Neo- Arc      | KO  | 8  | 8  | 0 | 5,125       | 6,17454452 |
| number_crou WT 1            | Neo+ Arc      | +/- | 10 | 10 | 0 | 6,7         | 3,6224608  |
| number_crou WT 1            | Neo+ Arc      | WT  | 14 | 14 | 0 | 3,42857143  | 3,7357789  |
| number_crou WT 2            | Neo- Arc      | +/- | 8  | 8  | 0 | 1,625       | 2,55999442 |
| number_crou WT 2            | Neo- Arc      | WT  | 7  | 7  | 0 | 2           | 2,82842712 |
| number_crou WT Bl6J         | Neo- Arc Bl6J | WT  | 6  | 6  | 0 | 0,33333333  | 0,81649658 |
| number_crou NA              | Neo+ Arc      | +/- | 15 | 15 | 0 | 4,8         | 5,87002069 |
| number_diggi Neo+ Arc KO    | Neo+ Arc      | +/- | 14 | 14 | 0 | 27,5        | 17,0101779 |
| number_diggi Neo+ Arc KO    | Neo+ Arc      | KO  | 15 | 15 | 0 | 23,3333333  | 23,8317515 |
| number_diggi Neo- Arc Bl6J  | Neo- Arc Bl6J | KO  | 7  | 7  | 0 | 86,6        | 37,520661  |
| number_diggi Neo- Arc KO    | Neo- Arc      | +/- | 7  | 7  | 0 | 25,4285714  | 20,9113776 |
| number_diggi Neo- Arc KO    | Neo- Arc      | KO  | 8  | 8  | 0 | 13          | 6,86606562 |
| number_diggi WT 1           | Neo+ Arc      | +/- | 10 | 10 | 0 | 13,7        | 17,2243368 |
| number_diggi WT 1           | Neo+ Arc      | WT  | 14 | 14 | 0 | 14,5714286  | 17,1541172 |
| number_diggi WT 2           | Neo- Arc      | +/- | 8  | 8  | 0 | 17,375      | 15,1179883 |
| number_diggi WT 2           | Neo- Arc      | WT  | 7  | 7  | 0 | 10,5714286  | 12,5014285 |
| number_diggi WT Bl6J        | Neo- Arc Bl6J | WT  | 6  | 6  | 0 | 76,3333333  | 32,3645897 |
| number_diggi NA             | Neo+ Arc      | +/- | 15 | 15 | 0 | 31,6        | 24,0380651 |
| number_groo Neo+ Arc KO     | Neo+ Arc      | +/- | 14 | 14 | 0 | 2,35714286  | 1,44686094 |
| number_groo Neo+ Arc KO     | Neo+ Arc      | KO  | 15 | 15 | 0 | 2,26666667  | 1,9808608  |
| number_groo Neo- Arc Bl6J   | Neo- Arc Bl6J | KO  | 7  | 7  | 0 | 2,6         | 2,19089023 |
| number_groo Neo- Arc KO     | Neo- Arc      | +/- | 7  | 7  | 0 | 3,14285714  | 2,11570094 |
| number_groo Neo- Arc KO     | Neo- Arc      | KO  | 8  | 8  | 0 | 2,875       | 2,35660167 |
| number_groo WT 1            | Neo+ Arc      | +/- | 10 | 10 | 0 | 1,6         | 2,11869981 |
| number_groo WT 1            | Neo+ Arc      | WT  | 14 | 14 | 0 | 3           | 3,30500786 |
| number_groo WT 2            | Neo- Arc      | +/- | 8  | 8  | 0 | 1,625       | 1,92260983 |
| number_groo WT 2            | Neo- Arc      | WT  | 7  | 7  | 0 | 1,28571429  | 1,11269728 |
| number_groo WT Bl6J         | Neo- Arc Bl6J | WT  | 6  | 6  | 0 | 3,16666667  | 2,56255081 |
| number_groo NA              | Neo+ Arc      | +/- | 15 | 15 | 0 | 2,33333333  | 2,43975018 |
| number_insid Neo+ Arc KO    | Neo+ Arc      | +/- | 14 | 14 | 0 | 23,7857143  | 9,84634701 |
| number_insid Neo+ Arc KO    | Neo+ Arc      | KO  | 15 | 15 | 0 | 17,86666667 | 11,9514892 |
| number_insid Neo- Arc Bl6J  | Neo- Arc Bl6J | KO  | 7  | 7  | 0 | 38,2        | 11,1669154 |
| number_insid Neo- Arc KO    | Neo- Arc      | +/- | 7  | 7  | 0 | 24,2857143  | 9,26848218 |
| number_insid Neo- Arc KO    | Neo- Arc      | KO  | 8  | 8  | 0 | 20,875      | 6,17454452 |
| number_insid WT 1           | Neo+ Arc      | +/- | 10 | 10 | 0 | 20,2        | 10,6332811 |
| number_insid WT 1           | Neo+ Arc      | WT  | 14 | 14 | 0 | 24,0714286  | 9,47437261 |
| number_insid WT 2           | Neo- Arc      | +/- | 8  | 8  | 0 | 26,625      | 9,14857522 |
| number_insid WT 2           | Neo- Arc      | WT  | 7  | 7  | 0 | 29,4285714  | 14,2811898 |
| number_insid WT Bl6J        | Neo- Arc Bl6J | WT  | 6  | 6  | 0 | 21,5        | 13,8094171 |
| number_insid NA             | Neo+ Arc      | +/- | 15 | 15 | 0 | 24,6666667  | 12,2396701 |

|                             |               |     |    |    |   |            |            |
|-----------------------------|---------------|-----|----|----|---|------------|------------|
| number_nesti Neo+ Arc KO    | Neo+ Arc      | +/- | 14 | 14 | 0 | 9,07142857 | 6,46248685 |
| number_nesti Neo+ Arc KO    | Neo+ Arc      | KO  | 15 | 15 | 0 | 7,93333333 | 10,2153013 |
| number_nesti Neo- Arc BI6J  | Neo- Arc BI6J | KO  | 7  | 7  | 0 | 5,6        | 5,77061522 |
| number_nesti Neo- Arc KO    | Neo- Arc      | +/- | 7  | 7  | 0 | 3          | 3,65148372 |
| number_nesti Neo- Arc KO    | Neo- Arc      | KO  | 8  | 8  | 0 | 11,25      | 6,27352715 |
| number_nesti WT 1           | Neo+ Arc      | +/- | 10 | 10 | 0 | 9,6        | 4,52646539 |
| number_nesti WT 1           | Neo+ Arc      | WT  | 14 | 14 | 0 | 11,5       | 6,24807663 |
| number_nesti WT 2           | Neo- Arc      | +/- | 8  | 8  | 0 | 10,125     | 9,04650682 |
| number_nesti WT 2           | Neo- Arc      | WT  | 7  | 7  | 0 | 16,2857143 | 8,4402663  |
| number_nesti WT BI6J        | Neo- Arc BI6J | WT  | 6  | 6  | 0 | 6,66666667 | 7,08989892 |
| number_nesti NA             | Neo+ Arc      | +/- | 15 | 15 | 0 | 9,66666667 | 7,0979541  |
| number_outsi Neo+ Arc KO    | Neo+ Arc      | +/- | 14 | 14 | 0 | 24,2142857 | 9,86975622 |
| number_outsi Neo+ Arc KO    | Neo+ Arc      | KO  | 15 | 15 | 0 | 18,2       | 11,8212883 |
| number_outsi Neo- Arc BI6J  | Neo- Arc BI6J | KO  | 7  | 7  | 0 | 39         | 11,2915898 |
| number_outsi Neo- Arc KO    | Neo- Arc      | +/- | 7  | 7  | 0 | 24         | 8,86942313 |
| number_outsi Neo- Arc KO    | Neo- Arc      | KO  | 8  | 8  | 0 | 21,125     | 6,7281392  |
| number_outsi WT 1           | Neo+ Arc      | +/- | 10 | 10 | 0 | 20,3       | 10,6671875 |
| number_outsi WT 1           | Neo+ Arc      | WT  | 14 | 14 | 0 | 24,4285714 | 9,81924551 |
| number_outsi WT 2           | Neo- Arc      | +/- | 8  | 8  | 0 | 26,875     | 9,17196816 |
| number_outsi WT 2           | Neo- Arc      | WT  | 7  | 7  | 0 | 29,5714286 | 14,6612544 |
| number_outsi WT BI6J        | Neo- Arc BI6J | WT  | 6  | 6  | 0 | 21,8333333 | 13,8768392 |
| number_outsi NA             | Neo+ Arc      | +/- | 15 | 15 | 0 | 25,1333333 | 12,0999803 |
| number_reari Neo+ Arc KO    | Neo+ Arc      | +/- | 14 | 14 | 0 | 60,0714286 | 47,1274284 |
| number_reari Neo+ Arc KO    | Neo+ Arc      | KO  | 15 | 15 | 0 | 62,7333333 | 43,30204   |
| number_reari Neo- Arc BI6J  | Neo- Arc BI6J | KO  | 7  | 7  | 0 | 103,2      | 36,2932501 |
| number_reari Neo- Arc KO    | Neo- Arc      | +/- | 7  | 7  | 0 | 87         | 49,0815648 |
| number_reari Neo- Arc KO    | Neo- Arc      | KO  | 8  | 8  | 0 | 90,5       | 67,8485709 |
| number_reari WT 1           | Neo+ Arc      | +/- | 10 | 10 | 0 | 46         | 39,8636565 |
| number_reari WT 1           | Neo+ Arc      | WT  | 14 | 14 | 0 | 51,1428571 | 36,1468312 |
| number_reari WT 2           | Neo- Arc      | +/- | 8  | 8  | 0 | 98,375     | 41,9555462 |
| number_reari WT 2           | Neo- Arc      | WT  | 7  | 7  | 0 | 73         | 46,921921  |
| number_reari WT BI6J        | Neo- Arc BI6J | WT  | 6  | 6  | 0 | 76         | 21,2790977 |
| number_reari NA             | Neo+ Arc      | +/- | 15 | 15 | 0 | 59,5333333 | 40,0211849 |
| number_sniffi Neo+ Arc KO   | Neo+ Arc      | +/- | 14 | 14 | 0 | 27,8571429 | 19,9300976 |
| number_sniffi Neo+ Arc KO   | Neo+ Arc      | KO  | 15 | 15 | 0 | 18,4666667 | 11,7099876 |
| number_sniffi Neo- Arc BI6J | Neo- Arc BI6J | KO  | 7  | 7  | 0 | 63,6       | 48,0343627 |
| number_sniffi Neo- Arc KO   | Neo- Arc      | +/- | 7  | 7  | 0 | 21,1428571 | 17,6203346 |
| number_sniffi Neo- Arc KO   | Neo- Arc      | KO  | 8  | 8  | 0 | 14,125     | 13,6532309 |
| number_sniffi WT 1          | Neo+ Arc      | +/- | 10 | 10 | 0 | 20,7       | 14,4764176 |
| number_sniffi WT 1          | Neo+ Arc      | WT  | 14 | 14 | 0 | 12,0714286 | 10,8448094 |
| number_sniffi WT 2          | Neo- Arc      | +/- | 8  | 8  | 0 | 15         | 7,50238057 |
| number_sniffi WT 2          | Neo- Arc      | WT  | 7  | 7  | 0 | 21,8571429 | 11,8100038 |
| number_sniffi WT BI6J       | Neo- Arc BI6J | WT  | 6  | 6  | 0 | 29,5       | 26,281172  |
| number_sniffi NA            | Neo+ Arc      | +/- | 15 | 15 | 0 | 19,2666667 | 13,6510945 |
| percentage_d Neo+ Arc KO    | Neo+ Arc      | +/- | 14 | 14 | 0 | 3,23129252 | 6,44362251 |
| percentage_d Neo+ Arc KO    | Neo+ Arc      | KO  | 15 | 15 | 0 | 35,7282251 | 44,4757563 |
| percentage_d Neo- Arc BI6J  | Neo- Arc BI6J | KO  | 7  | 7  | 0 | NA         | NA         |
| percentage_d Neo- Arc KO    | Neo- Arc      | +/- | 7  | 7  | 0 | 0          | 0          |
| percentage_d Neo- Arc KO    | Neo- Arc      | KO  | 8  | 8  | 0 | 1,78571429 | 5,05076272 |
| percentage_d WT 1           | Neo+ Arc      | +/- | 10 | 10 | 0 | 0          | 0          |
| percentage_d WT 1           | Neo+ Arc      | WT  | 14 | 14 | 0 | 7,67857143 | 23,5842248 |
| percentage_d WT 2           | Neo- Arc      | +/- | 8  | 8  | 0 | 5,41666667 | 11,8103398 |
| percentage_d WT 2           | Neo- Arc      | WT  | 7  | 7  | 0 | 1,58730159 | 4,19960526 |
| percentage_d WT BI6J        | Neo- Arc BI6J | WT  | 6  | 6  | 0 | NA         | NA         |
| percentage_d NA             | Neo+ Arc      | +/- | 15 | 15 | 0 | 2,06466667 | 5,46701912 |
| percentage_p Neo+ Arc KO    | Neo+ Arc      | +/- | 14 | 14 | 0 | 100        | 0          |
| percentage_p Neo+ Arc KO    | Neo+ Arc      | KO  | 15 | 15 | 0 | 92,6346801 | 12,1648807 |
| percentage_p Neo- Arc BI6J  | Neo- Arc BI6J | KO  | 7  | 7  | 0 | NA         | NA         |
| percentage_p Neo- Arc KO    | Neo- Arc      | +/- | 7  | 7  | 0 | 100        | 0          |
| percentage_p Neo- Arc KO    | Neo- Arc      | KO  | 8  | 8  | 0 | 100        | 0          |
| percentage_p WT 1           | Neo+ Arc      | +/- | 10 | 10 | 0 | 99         | 3,16227766 |
| percentage_p WT 1           | Neo+ Arc      | WT  | 14 | 14 | 0 | 98,8092857 | 4,4552449  |
| percentage_p WT 2           | Neo- Arc      | +/- | 8  | 8  | 0 | 75         | 46,291005  |
| percentage_p WT 2           | Neo- Arc      | WT  | 7  | 7  | 0 | 98,4126984 | 4,19960526 |
| percentage_p WT BI6J        | Neo- Arc BI6J | WT  | 6  | 6  | 0 | NA         | NA         |
| percentage_p NA             | Neo+ Arc      | +/- | 15 | 15 | 0 | 92,3806667 | 25,819968  |
| percentage_ti Neo+ Arc KO   | Neo+ Arc      | +/- | 14 | 14 | 0 | 52,0373795 | 20,5989795 |
| percentage_ti Neo+ Arc KO   | Neo+ Arc      | KO  | 15 | 15 | 0 | 52,5920724 | 30,967325  |
| percentage_ti Neo- Arc BI6J | Neo- Arc BI6J | KO  | 7  | 7  | 0 | 82,6988567 | 8,50006559 |
| percentage_ti Neo- Arc KO   | Neo- Arc      | +/- | 7  | 7  | 0 | 58,5937782 | 25,1044376 |

|                               |               |     |    |    |   |            |            |
|-------------------------------|---------------|-----|----|----|---|------------|------------|
| percentage_ti Neo- Arc KO     | Neo- Arc      | KO  | 8  | 8  | 0 | 51,9056607 | 27,6977326 |
| percentage_ti WT 1            | Neo+ Arc      | +/- | 10 | 10 | 0 | 29,4513196 | 17,6884464 |
| percentage_ti WT 1            | Neo+ Arc      | WT  | 14 | 14 | 0 | 36,2849224 | 17,5593306 |
| percentage_ti WT 2            | Neo- Arc      | +/- | 8  | 8  | 0 | 57,7365088 | 21,7495433 |
| percentage_ti WT 2            | Neo- Arc      | WT  | 7  | 7  | 0 | 51,7592796 | 17,7912376 |
| percentage_ti WT Bl6J         | Neo- Arc Bl6J | WT  | 6  | 6  | 0 | 80,5875005 | 15,4066659 |
| percentage_ti NA              | Neo+ Arc      | +/- | 15 | 15 | 0 | 46,383957  | 19,1711538 |
| postparturitic Neo+ Arc KO    | Neo+ Arc      | +/- | 14 | 14 | 0 | 2,14285714 | 0,88640526 |
| postparturitic Neo+ Arc KO    | Neo+ Arc      | KO  | 15 | 15 | 0 | 2,53333333 | 1,06009883 |
| postparturitic Neo- Arc Bl6J  | Neo- Arc Bl6J | KO  | 7  | 7  | 0 | NA         | NA         |
| postparturitic Neo- Arc KO    | Neo- Arc      | +/- | 7  | 7  | 0 | 2,5        | 0,76376262 |
| postparturitic Neo- Arc KO    | Neo- Arc      | KO  | 8  | 8  | 0 | 2,75       | 1,28173989 |
| postparturitic WT 1           | Neo+ Arc      | +/- | 10 | 10 | 0 | 2,6        | 0,77459667 |
| postparturitic WT 1           | Neo+ Arc      | WT  | 14 | 14 | 0 | 3,42857143 | 0,75592895 |
| postparturitic WT 2           | Neo- Arc      | +/- | 8  | 8  | 0 | 3,28571429 | 0,75592895 |
| postparturitic WT 2           | Neo- Arc      | WT  | 7  | 7  | 0 | 3,35714286 | 0,74801324 |
| postparturitic WT Bl6J        | Neo- Arc Bl6J | WT  | 6  | 6  | 0 | NA         | NA         |
| postparturitic NA             | Neo+ Arc      | +/- | 15 | 15 | 0 | 2,6        | 0,89042526 |
| preparturitiior Neo+ Arc KO   | Neo+ Arc      | +/- | 14 | 14 | 0 | 3,03571429 | 1,21630408 |
| preparturitiior Neo+ Arc KO   | Neo+ Arc      | KO  | 15 | 15 | 0 | 2,86666667 | 1,30201309 |
| preparturitiior Neo- Arc Bl6J | Neo- Arc Bl6J | KO  | 7  | 7  | 0 | NA         | NA         |
| preparturitiior Neo- Arc KO   | Neo- Arc      | +/- | 7  | 7  | 0 | 2,71428571 | 1,46791073 |
| preparturitiior Neo- Arc KO   | Neo- Arc      | KO  | 8  | 8  | 0 | 2,625      | 1,06066017 |
| preparturitiior WT 1          | Neo+ Arc      | +/- | 10 | 10 | 0 | 3,25       | 0,79056942 |
| preparturitiior WT 1          | Neo+ Arc      | WT  | 14 | 14 | 0 | 2,71428571 | 0,91387353 |
| preparturitiior WT 2          | Neo- Arc      | +/- | 8  | 8  | 0 | 2,6875     | 1,27999721 |
| preparturitiior WT 2          | Neo- Arc      | WT  | 7  | 7  | 0 | 2,92857143 | 1,01770049 |
| preparturitiior WT Bl6J       | Neo- Arc Bl6J | WT  | 6  | 6  | 0 | NA         | NA         |
| preparturitiior NA            | Neo+ Arc      | +/- | 15 | 15 | 0 | 2,8        | 1,26491106 |
| test_duration Neo+ Arc KO     | Neo+ Arc      | +/- | 14 | 14 | 0 | 1793,288   | 13,9254579 |
| test_duration Neo+ Arc KO     | Neo+ Arc      | KO  | 15 | 15 | 0 | 1792,67407 | 11,1898965 |
| test_duration Neo- Arc Bl6J   | Neo- Arc Bl6J | KO  | 7  | 7  | 0 | 1786,5096  | 113,97156  |
| test_duration Neo- Arc KO     | Neo- Arc      | +/- | 7  | 7  | 0 | 1798,963   | 5,53988505 |
| test_duration Neo- Arc KO     | Neo- Arc      | KO  | 8  | 8  | 0 | 1794,878   | 7,95484278 |
| test_duration WT 1            | Neo+ Arc      | +/- | 10 | 10 | 0 | 1793,0529  | 7,82694221 |
| test_duration WT 1            | Neo+ Arc      | WT  | 14 | 14 | 0 | 1788,34164 | 13,7355234 |
| test_duration WT 2            | Neo- Arc      | +/- | 8  | 8  | 0 | 1791,23863 | 11,9172563 |
| test_duration WT 2            | Neo- Arc      | WT  | 7  | 7  | 0 | 1796,88957 | 6,86272538 |
| test_duration WT Bl6J         | Neo- Arc Bl6J | WT  | 6  | 6  | 0 | 1664,874   | 257,908687 |
| test_duration NA              | Neo+ Arc      | +/- | 15 | 15 | 0 | 1793,65953 | 9,83233613 |
| time_crouchi Neo+ Arc KO      | Neo+ Arc      | +/- | 14 | 14 | 0 | 168,268643 | 209,823538 |
| time_crouchi Neo+ Arc KO      | Neo+ Arc      | KO  | 15 | 15 | 0 | 29,2730667 | 113,3741   |
| time_crouchi Neo- Arc Bl6J    | Neo- Arc Bl6J | KO  | 7  | 7  | 0 | 0          | 0          |
| time_crouchi Neo- Arc KO      | Neo- Arc      | +/- | 7  | 7  | 0 | 132,858429 | 217,755124 |
| time_crouchi Neo- Arc KO      | Neo- Arc      | KO  | 8  | 8  | 0 | 200,9555   | 292,65913  |
| time_crouchi WT 1             | Neo+ Arc      | +/- | 10 | 10 | 0 | 450,9109   | 381,030295 |
| time_crouchi WT 1             | Neo+ Arc      | WT  | 14 | 14 | 0 | 299,284357 | 399,945156 |
| time_crouchi WT 2             | Neo- Arc      | +/- | 8  | 8  | 0 | 61,695     | 101,939343 |
| time_crouchi WT 2             | Neo- Arc      | WT  | 7  | 7  | 0 | 26,3481429 | 34,9510163 |
| time_crouchi WT Bl6J          | Neo- Arc Bl6J | WT  | 6  | 6  | 0 | 5,70866667 | 13,9833204 |
| time_crouchi NA               | Neo+ Arc      | +/- | 15 | 15 | 0 | 225,811067 | 365,71656  |
| time_digging Neo+ Arc KO      | Neo+ Arc      | +/- | 14 | 14 | 0 | 119,316714 | 153,231467 |
| time_digging Neo+ Arc KO      | Neo+ Arc      | KO  | 15 | 15 | 0 | 82,8230667 | 104,795831 |
| time_digging Neo- Arc Bl6J    | Neo- Arc Bl6J | KO  | 7  | 7  | 0 | 305,2876   | 154,546119 |
| time_digging Neo- Arc KO      | Neo- Arc      | +/- | 7  | 7  | 0 | 100,412571 | 114,531969 |
| time_digging Neo- Arc KO      | Neo- Arc      | KO  | 8  | 8  | 0 | 26,01575   | 16,2692953 |
| time_digging WT 1             | Neo+ Arc      | +/- | 10 | 10 | 0 | 36,1397    | 56,8772032 |
| time_digging WT 1             | Neo+ Arc      | WT  | 14 | 14 | 0 | 46,9025714 | 56,7814651 |
| time_digging WT 2             | Neo- Arc      | +/- | 8  | 8  | 0 | 48,62825   | 60,2416729 |
| time_digging WT 2             | Neo- Arc      | WT  | 7  | 7  | 0 | 29,0751429 | 47,5853811 |
| time_digging WT Bl6J          | Neo- Arc Bl6J | WT  | 6  | 6  | 0 | 300,173667 | 194,845622 |
| time_digging NA               | Neo+ Arc      | +/- | 15 | 15 | 0 | 110,2996   | 103,259278 |
| time_groomir Neo+ Arc KO      | Neo+ Arc      | +/- | 14 | 14 | 0 | 73,9040714 | 133,967413 |
| time_groomir Neo+ Arc KO      | Neo+ Arc      | KO  | 15 | 15 | 0 | 44,9331333 | 51,89352   |
| time_groomir Neo- Arc Bl6J    | Neo- Arc Bl6J | KO  | 7  | 7  | 0 | 18,9998    | 19,1482017 |
| time_groomir Neo- Arc KO      | Neo- Arc      | +/- | 7  | 7  | 0 | 58,984     | 59,3233946 |
| time_groomir Neo- Arc KO      | Neo- Arc      | KO  | 8  | 8  | 0 | 92,996875  | 89,7317631 |
| time_groomir WT 1             | Neo+ Arc      | +/- | 10 | 10 | 0 | 45,4745    | 80,5778013 |
| time_groomir WT 1             | Neo+ Arc      | WT  | 14 | 14 | 0 | 95,3552857 | 128,931017 |
| time_groomir WT 2             | Neo- Arc      | +/- | 8  | 8  | 0 | 29,70425   | 30,2521688 |

|                             |               |     |    |    |    |            |            |
|-----------------------------|---------------|-----|----|----|----|------------|------------|
| time_groomir WT 2           | Neo- Arc      | WT  | 7  | 7  | 0  | 21,3591429 | 18,3318345 |
| time_groomir WT Bl6J        | Neo- Arc Bl6J | WT  | 6  | 6  | 0  | 42,7485    | 71,6716109 |
| time_groomir NA             | Neo+ Arc      | +/- | 15 | 15 | 0  | 33,5198667 | 37,1080596 |
| time_inside_n Neo+ Arc KO   | Neo+ Arc      | +/- | 14 | 14 | 0  | 857,892    | 367,185023 |
| time_inside_n Neo+ Arc KO   | Neo+ Arc      | KO  | 15 | 15 | 0  | 849,082467 | 557,038593 |
| time_inside_n Neo- Arc Bl6J | Neo- Arc Bl6J | KO  | 7  | 7  | 0  | 315,1008   | 160,723426 |
| time_inside_n Neo- Arc KO   | Neo- Arc      | +/- | 7  | 7  | 0  | 743,815286 | 452,46838  |
| time_inside_n Neo- Arc KO   | Neo- Arc      | KO  | 8  | 8  | 0  | 859,804125 | 500,393393 |
| time_inside_n WT 1          | Neo+ Arc      | +/- | 10 | 10 | 0  | 1263,1901  | 318,879552 |
| time_inside_n WT 1          | Neo+ Arc      | WT  | 14 | 14 | 0  | 1137,35114 | 313,651534 |
| time_inside_n WT 2          | Neo- Arc      | +/- | 8  | 8  | 0  | 755,14725  | 390,655808 |
| time_inside_n WT 2          | Neo- Arc      | WT  | 7  | 7  | 0  | 865,293    | 320,372202 |
| time_inside_n WT Bl6J       | Neo- Arc Bl6J | WT  | 6  | 6  | 0  | 334,88     | 293,109732 |
| time_inside_n NA            | Neo+ Arc      | +/- | 15 | 15 | 0  | 958,731467 | 344,031059 |
| time_nesting Neo+ Arc KO    | Neo+ Arc      | +/- | 14 | 14 | 0  | 151,743857 | 153,711521 |
| time_nesting Neo+ Arc KO    | Neo+ Arc      | KO  | 15 | 15 | 0  | 95,6044    | 130,955286 |
| time_nesting Neo- Arc Bl6J  | Neo- Arc Bl6J | KO  | 7  | 7  | 0  | 28,3984    | 26,301024  |
| time_nesting Neo- Arc KO    | Neo- Arc      | +/- | 7  | 7  | 0  | 21,0245714 | 30,6735796 |
| time_nesting Neo- Arc KO    | Neo- Arc      | KO  | 8  | 8  | 0  | 107,88925  | 69,1701428 |
| time_nesting WT 1           | Neo+ Arc      | +/- | 10 | 10 | 0  | 178,2241   | 95,2225992 |
| time_nesting WT 1           | Neo+ Arc      | WT  | 14 | 14 | 0  | 155,080286 | 96,9977882 |
| time_nesting WT 2           | Neo- Arc      | +/- | 8  | 8  | 0  | 135,042    | 144,778457 |
| time_nesting WT 2           | Neo- Arc      | WT  | 7  | 7  | 0  | 139,889286 | 51,0005527 |
| time_nesting WT Bl6J        | Neo- Arc Bl6J | WT  | 6  | 6  | 0  | 55,708     | 88,7368592 |
| time_nesting NA             | Neo+ Arc      | +/- | 15 | 15 | 0  | 113,060933 | 74,433013  |
| time_outside Neo+ Arc KO    | Neo+ Arc      | +/- | 14 | 14 | 0  | 934,429714 | 372,197735 |
| time_outside Neo+ Arc KO    | Neo+ Arc      | KO  | 15 | 15 | 0  | 941,2982   | 552,376557 |
| time_outside Neo- Arc Bl6J  | Neo- Arc Bl6J | KO  | 7  | 7  | 0  | 1470,7102  | 81,696861  |
| time_outside Neo- Arc KO    | Neo- Arc      | +/- | 7  | 7  | 0  | 1053,55229 | 449,5673   |
| time_outside Neo- Arc KO    | Neo- Arc      | KO  | 8  | 8  | 0  | 931,169125 | 495,219099 |
| time_outside WT 1           | Neo+ Arc      | +/- | 10 | 10 | 0  | 527,5569   | 315,697251 |
| time_outside WT 1           | Neo+ Arc      | WT  | 14 | 14 | 0  | 648,8145   | 313,317069 |
| time_outside WT 2           | Neo- Arc      | +/- | 8  | 8  | 0  | 1034,15675 | 390,490804 |
| time_outside WT 2           | Neo- Arc      | WT  | 7  | 7  | 0  | 929,396143 | 316,855192 |
| time_outside WT Bl6J        | Neo- Arc Bl6J | WT  | 6  | 6  | 0  | 1329,66317 | 290,054989 |
| time_outside NA             | Neo+ Arc      | +/- | 15 | 15 | 0  | 832,070667 | 343,793901 |
| time_sniffing Neo+ Arc KO   | Neo+ Arc      | +/- | 14 | 14 | 0  | 82,1684286 | 83,5484936 |
| time_sniffing Neo+ Arc KO   | Neo+ Arc      | KO  | 15 | 15 | 0  | 29,5408    | 21,6663307 |
| time_sniffing Neo- Arc Bl6J | Neo- Arc Bl6J | KO  | 7  | 7  | 0  | 74,7364    | 65,9633894 |
| time_sniffing Neo- Arc KO   | Neo- Arc      | +/- | 7  | 7  | 0  | 30,5788571 | 27,3876273 |
| time_sniffing Neo- Arc KO   | Neo- Arc      | KO  | 8  | 8  | 0  | 26,282875  | 30,908998  |
| time_sniffing WT 1          | Neo+ Arc      | +/- | 10 | 10 | 0  | 61,7031    | 54,7627198 |
| time_sniffing WT 1          | Neo+ Arc      | WT  | 14 | 14 | 0  | 23,326     | 25,7467344 |
| time_sniffing WT 2          | Neo- Arc      | +/- | 8  | 8  | 0  | 23,5615    | 17,0002915 |
| time_sniffing WT 2          | Neo- Arc      | WT  | 7  | 7  | 0  | 34,2325714 | 16,8882572 |
| time_sniffing WT Bl6J       | Neo- Arc Bl6J | WT  | 6  | 6  | 0  | 39,1606667 | 37,2526238 |
| time_sniffing NA            | Neo+ Arc      | +/- | 15 | 15 | 0  | 33,8155333 | 21,89279   |
| E+Maze_cente Neo+ Arc KO    | Neo+ Arc KO   | NA  | 13 | 9  | 4  | 7,07692308 | 4,05095747 |
| E+Maze_cente WT             | WT            | NA  | 20 | 10 | 10 | 20,1       | 9,17031825 |
| E+Maze_cente Neo+ Arc KO    | Neo+ Arc KO   | NA  | 13 | 9  | 4  | 111,730769 | 92,7270671 |
| E+Maze_cente WT             | WT            | NA  | 20 | 10 | 10 | 106,795    | 75,1075893 |
| E+Maze_close Neo+ Arc KO    | Neo+ Arc KO   | NA  | 13 | 9  | 4  | 4,61538462 | 4,95880465 |
| E+Maze_close WT             | WT            | NA  | 20 | 10 | 10 | 13,1       | 5,88396572 |
| E+Maze_close Neo+ Arc KO    | Neo+ Arc KO   | NA  | 13 | 9  | 4  | 115,161538 | 94,1910606 |
| E+Maze_close WT             | WT            | NA  | 20 | 10 | 10 | 130,255    | 80,1451018 |
| E+Maze_distar Neo+ Arc KO   | Neo+ Arc KO   | NA  | 13 | 9  | 4  | 2,14846154 | 1,32914519 |
| E+Maze_distar WT            | WT            | NA  | 20 | 10 | 10 | 3,6197     | 1,32550559 |
| E+Maze_open Neo+ Arc KO     | Neo+ Arc KO   | NA  | 13 | 9  | 4  | 8,69230769 | 5,80781966 |
| E+Maze_open WT              | WT            | NA  | 20 | 10 | 10 | 15,4       | 8,71417478 |
| E+Maze_open Neo+ Arc KO     | Neo+ Arc KO   | NA  | 13 | 9  | 4  | 73,1153846 | 67,5918985 |
| E+Maze_open WT              | WT            | NA  | 20 | 10 | 10 | 62,94      | 48,6363563 |
| E+maze_immc Neo+ Arc KO     | Neo+ Arc KO   | NA  | 13 | 9  | 4  | 72,7307692 | 62,5122306 |
| E+maze_immc WT              | WT            | NA  | 20 | 10 | 10 | 66,075     | 80,8955264 |
| foodLocalizati Neo+ Arc KO  | Neo+ Arc KO   | NA  | 16 | 12 | 4  | 136,5625   | 92,7915001 |
| foodLocalizati WT           | WT            | NA  | 19 | 7  | 12 | 147,473684 | 99,6880515 |
| innateOlfacto Neo+ Arc KO   | Neo+ Arc KO   | NA  | 13 | 9  | 4  | 3,30769231 | 1,84321347 |
| innateOlfacto WT            | WT            | NA  | 18 | 8  | 10 | 2,44444444 | 1,29352333 |
| innateOlfacto Neo+ Arc KO   | Neo+ Arc KO   | NA  | 13 | 9  | 4  | 6,21815385 | 6,96389407 |
| innateOlfacto WT            | WT            | NA  | 18 | 8  | 10 | 5,23583333 | 6,29623596 |
| innateOlfacto Neo+ Arc KO   | Neo+ Arc KO   | NA  | 13 | 9  | 4  | 1,92307692 | 2,56455124 |

|                           |             |    |    |    |    |             |            |
|---------------------------|-------------|----|----|----|----|-------------|------------|
| innateOlfacto WT          | WT          | NA | 20 | 10 | 10 | 1,9         | 1,94395148 |
| innateOlfacto Neo+ Arc KO | Neo+ Arc KO | NA | 13 | 9  | 4  | 4,17546154  | 8,86076585 |
| innateOlfacto WT          | WT          | NA | 20 | 10 | 10 | 3,37495     | 5,68422242 |
| innateOlfacto Neo+ Arc KO | Neo+ Arc KO | NA | 13 | 9  | 4  | 0,92307692  | 1,32045058 |
| innateOlfacto WT          | WT          | NA | 20 | 10 | 10 | 1,9         | 1,44732057 |
| innateOlfacto Neo+ Arc KO | Neo+ Arc KO | NA | 13 | 9  | 4  | 1,22569231  | 2,38112912 |
| innateOlfacto WT          | WT          | NA | 20 | 10 | 10 | 4,06835     | 5,50200747 |
| innateOlfacto Neo+ Arc KO | Neo+ Arc KO | NA | 13 | 9  | 4  | 3,38461538  | 4,01120226 |
| innateOlfacto WT          | WT          | NA | 20 | 10 | 10 | 2,25        | 2,67296406 |
| innateOlfacto Neo+ Arc KO | Neo+ Arc KO | NA | 13 | 9  | 4  | 6,72338462  | 6,81767309 |
| innateOlfacto WT          | WT          | NA | 20 | 10 | 10 | 3,2673      | 3,16592285 |
| innateOlfacto Neo+ Arc KO | Neo+ Arc KO | NA | 13 | 9  | 4  | 2,07692308  | 2,56455124 |
| innateOlfacto WT          | WT          | NA | 20 | 10 | 10 | 1,75        | 2,42519668 |
| innateOlfacto Neo+ Arc KO | Neo+ Arc KO | NA | 13 | 9  | 4  | 3,65576923  | 5,40905419 |
| innateOlfacto WT          | WT          | NA | 20 | 10 | 10 | 4,0415      | 5,66390073 |
| marble_half_t Neo+ Arc KO | Neo+ Arc KO | NA | 13 | 7  | 6  | 1,92307692  | 0,8623165  |
| marble_half_t WT          | WT          | NA | 9  | 4  | 5  | 2,55555556  | 1,50923086 |
| marble_more Neo+ Arc KO   | Neo+ Arc KO | NA | 13 | 7  | 6  | 17          | 2,41522946 |
| marble_more WT            | WT          | NA | 9  | 4  | 5  | 16,44444444 | 1,50923086 |
| marble_more Neo+ Arc KO   | Neo+ Arc KO | NA | 13 | 7  | 6  | 15,0769231  | 2,62873666 |
| marble_more WT            | WT          | NA | 9  | 4  | 5  | 13,88888889 | 2,02758751 |
| marble_not_t Neo+ Arc KO  | Neo+ Arc KO | NA | 13 | 7  | 6  | 3           | 2,41522946 |
| marble_not_t WT           | WT          | NA | 9  | 4  | 5  | 3,55555556  | 1,50923086 |
| marble_totall Neo+ Arc KO | Neo+ Arc KO | NA | 13 | 7  | 6  | 11,3846154  | 3,33012666 |
| marble_totall WT          | WT          | NA | 9  | 4  | 5  | 10,66666667 | 2,6925824  |
| marble_two_t Neo+ Arc KO  | Neo+ Arc KO | NA | 13 | 7  | 6  | 3,69230769  | 2,05688338 |
| marble_two_t WT           | WT          | NA | 9  | 4  | 5  | 3,22222222  | 1,30170828 |
| ms_digging_d Neo+ Arc KO  | Neo+ Arc KO | NA | 10 | 6  | 4  | 4,8952      | 1,46306845 |
| ms_digging_d Neo- Arc KO  | Neo- Arc KO | NA | 25 | 13 | 12 | 2,66816     | 0,91034388 |
| ms_digging_d WT           | WT          | NA | 31 | 15 | 16 | 2,38357766  | 1,19723475 |
| ms_digging_n Neo+ Arc KO  | Neo+ Arc KO | NA | 10 | 6  | 4  | 30,7        | 13,2417689 |
| ms_digging_n Neo- Arc KO  | Neo- Arc KO | NA | 25 | 13 | 12 | 36,68       | 17,1918585 |
| ms_digging_n WT           | WT          | NA | 31 | 15 | 16 | 41,3548387  | 20,6825988 |
| ms_digging_ti Neo+ Arc KO | Neo+ Arc KO | NA | 10 | 6  | 4  | 144,8339    | 69,1796005 |
| ms_digging_ti Neo- Arc KO | Neo- Arc KO | NA | 25 | 13 | 12 | 99,86768    | 57,6930366 |
| ms_digging_ti WT          | WT          | NA | 31 | 15 | 16 | 99,925871   | 63,0786932 |
| ms_headShak Neo+ Arc KO   | Neo+ Arc KO | NA | 10 | 6  | 4  | 5,2         | 2,65832027 |
| ms_headShak Neo- Arc KO   | Neo- Arc KO | NA | 25 | 13 | 12 | 3,24        | 2,50466232 |
| ms_headShak WT            | WT          | NA | 31 | 15 | 16 | 2,90322581  | 1,90359027 |
| ms_immobilit Neo+ Arc KO  | Neo+ Arc KO | NA | 10 | 6  | 4  | 1,6477      | 3,5706541  |
| ms_immobilit Neo- Arc KO  | Neo- Arc KO | NA | 25 | 13 | 12 | 0,15664     | 0,7832     |
| ms_immobilit WT           | WT          | NA | 31 | 15 | 16 | 0           | 0          |
| ms_immobilit Neo+ Arc KO  | Neo+ Arc KO | NA | 10 | 6  | 4  | 0,2         | 0,42163702 |
| ms_immobilit Neo- Arc KO  | Neo- Arc KO | NA | 25 | 13 | 12 | 0,08        | 0,4        |
| ms_immobilit WT           | WT          | NA | 31 | 15 | 16 | 0           | 0          |
| ms_immobilit Neo+ Arc KO  | Neo+ Arc KO | NA | 10 | 6  | 4  | 1,6477      | 3,5706541  |
| ms_immobilit Neo- Arc KO  | Neo- Arc KO | NA | 25 | 13 | 12 | 0,31332     | 1,5666     |
| ms_immobilit WT           | WT          | NA | 31 | 15 | 16 | 0           | 0          |
| ms_rearing Neo+ Arc KO    | Neo+ Arc KO | NA | 10 | 6  | 4  | 54,3        | 21,5924369 |
| ms_rearing Neo- Arc KO    | Neo- Arc KO | NA | 25 | 13 | 12 | 59,84       | 18,8540005 |
| ms_rearing WT             | WT          | NA | 31 | 15 | 16 | 66,9032258  | 24,9537637 |
| ms_scratchin Neo+ Arc KO  | Neo+ Arc KO | NA | 10 | 6  | 4  | 1,7         | 1,56702124 |
| ms_scratchin Neo- Arc KO  | Neo- Arc KO | NA | 25 | 13 | 12 | 1,72        | 1,96892526 |
| ms_scratchin WT           | WT          | NA | 31 | 15 | 16 | 0,77419355  | 1,02338254 |
| ms_selfGroom Neo+ Arc KO  | Neo+ Arc KO | NA | 10 | 6  | 4  | 15,36295    | 4,85735472 |
| ms_selfGroom Neo- Arc KO  | Neo- Arc KO | NA | 25 | 13 | 12 | 12,2116     | 6,82963256 |
| ms_selfGroom WT           | WT          | NA | 31 | 15 | 16 | 8,42258065  | 3,60491297 |
| ms_selfGroom Neo+ Arc KO  | Neo+ Arc KO | NA | 10 | 6  | 4  | 3           | 1,41421356 |
| ms_selfGroom Neo- Arc KO  | Neo- Arc KO | NA | 25 | 13 | 12 | 4,24        | 2,4200551  |
| ms_selfGroom WT           | WT          | NA | 31 | 15 | 16 | 2,51612903  | 1,91260673 |
| ms_selfGroom Neo+ Arc KO  | Neo+ Arc KO | NA | 10 | 6  | 4  | 49,8724     | 37,1359942 |
| ms_selfGroom Neo- Arc KO  | Neo- Arc KO | NA | 25 | 13 | 12 | 51,04108    | 33,9308879 |
| ms_selfGroom WT           | WT          | NA | 31 | 15 | 16 | 20,9134839  | 16,8280434 |
| novelObject_t Neo+ Arc KO | Neo+ Arc KO | NA | 15 | 8  | 7  | -0,0842177  | 0,40678097 |
| novelObject_t WT          | WT          | NA | 12 | 8  | 4  | 0,01384455  | 0,31045292 |
| novelObject_t Neo+ Arc KO | Neo+ Arc KO | NA | 15 | 8  | 7  | 13,13333333 | 14,3967589 |
| novelObject_t WT          | WT          | NA | 12 | 8  | 4  | 10,9166667  | 9,23883437 |
| novelObject_t Neo+ Arc KO | Neo+ Arc KO | NA | 15 | 8  | 7  | 21,3        | 31,8479199 |
| novelObject_t WT          | WT          | NA | 12 | 8  | 4  | 12,18333333 | 10,5395216 |
| novelObject_t Neo+ Arc KO | Neo+ Arc KO | NA | 15 | 8  | 7  | 12          | 9,84160266 |

|                            |             |    |    |    |    |            |            |
|----------------------------|-------------|----|----|----|----|------------|------------|
| novelObject_1 WT           | WT          | NA | 12 | 8  | 4  | 7,58333333 | 4,29499356 |
| novelObject_1 Neo+ Arc KO  | Neo+ Arc KO | NA | 15 | 8  | 7  | 15,2       | 12,7433456 |
| novelObject_1 WT           | WT          | NA | 12 | 8  | 4  | 13,025     | 13,0703777 |
| novelObject_1 Neo+ Arc KO  | Neo+ Arc KO | NA | 15 | 8  | 7  | 0,03050903 | 0,57370162 |
| novelObject_1 WT           | WT          | NA | 12 | 8  | 4  | -0,2036481 | 0,39272387 |
| novelObject_1 Neo+ Arc KO  | Neo+ Arc KO | NA | 15 | 8  | 7  | 7,06666667 | 6,19292992 |
| novelObject_1 WT           | WT          | NA | 12 | 8  | 4  | 12,1666667 | 10,0257245 |
| novelObject_1 Neo+ Arc KO  | Neo+ Arc KO | NA | 15 | 8  | 7  | 12,2733333 | 13,3431345 |
| novelObject_1 WT           | WT          | NA | 12 | 8  | 4  | 17,5166667 | 21,620522  |
| novelObject_1 Neo+ Arc KO  | Neo+ Arc KO | NA | 15 | 8  | 7  | 7,73333333 | 8,89194392 |
| novelObject_1 WT           | WT          | NA | 12 | 8  | 4  | 7,75       | 6,19567298 |
| novelObject_1 Neo+ Arc KO  | Neo+ Arc KO | NA | 15 | 8  | 7  | 14,0933333 | 20,252459  |
| novelObject_1 WT           | WT          | NA | 12 | 8  | 4  | 10         | 11,5502853 |
| novelObject_1 Neo+ Arc KO  | Neo+ Arc KO | NA | 15 | 8  | 7  | 0,14252863 | 0,4443839  |
| novelObject_1 WT           | WT          | NA | 12 | 8  | 4  | 0,02074363 | 0,32147898 |
| novelObject_1 Neo+ Arc KO  | Neo+ Arc KO | NA | 15 | 8  | 7  | 13,6       | 10,7158094 |
| novelObject_1 WT           | WT          | NA | 12 | 8  | 4  | 13,25      | 8,22551463 |
| novelObject_1 Neo+ Arc KO  | Neo+ Arc KO | NA | 15 | 8  | 7  | 27,2533333 | 38,3711362 |
| novelObject_1 WT           | WT          | NA | 12 | 8  | 4  | 26,0833333 | 18,3189834 |
| novelObject_1 Neo+ Arc KO  | Neo+ Arc KO | NA | 15 | 8  | 7  | 14,0666667 | 12,3315314 |
| novelObject_1 WT           | WT          | NA | 12 | 8  | 4  | 13,5       | 6,92163932 |
| novelObject_1 Neo+ Arc KO  | Neo+ Arc KO | NA | 15 | 8  | 7  | 40,3866667 | 38,1126501 |
| novelObject_1 WT           | WT          | NA | 12 | 8  | 4  | 27,5666667 | 18,820846  |
| novelObject_1 Neo+ Arc KO  | Neo+ Arc KO | NA | 15 | 8  | 7  | -0,0666101 | 0,34563392 |
| novelObject_1 WT           | WT          | NA | 12 | 8  | 4  | 0,16023413 | 0,33895987 |
| novelObject_1 Neo+ Arc KO  | Neo+ Arc KO | NA | 15 | 8  | 7  | 15,5333333 | 13,1304807 |
| novelObject_1 WT           | WT          | NA | 12 | 8  | 4  | 9,91666667 | 4,66043957 |
| novelObject_1 Neo+ Arc KO  | Neo+ Arc KO | NA | 15 | 8  | 7  | 39,5866667 | 41,4758254 |
| novelObject_1 WT           | WT          | NA | 12 | 8  | 4  | 16,7583333 | 10,8085369 |
| novelObject_1 Neo+ Arc KO  | Neo+ Arc KO | NA | 15 | 8  | 7  | 17,4       | 13,5319727 |
| novelObject_1 WT           | WT          | NA | 12 | 8  | 4  | 16         | 7,83929496 |
| novelObject_1 Neo+ Arc KO  | Neo+ Arc KO | NA | 15 | 8  | 7  | 25,08      | 16,5799879 |
| novelObject_1 WT           | WT          | NA | 12 | 8  | 4  | 25,8416667 | 20,8057011 |
| nsf_food_inta Neo+ Arc KO  | Neo+ Arc KO | NA | 13 | 7  | 6  | 0,25384615 | 0,05637747 |
| nsf_food_inta WT           | WT          | NA | 8  | 4  | 4  | 0,5125     | 0,16201852 |
| nsf_food_inta Neo+ Arc KO  | Neo+ Arc KO | NA | 9  | 3  | 6  | 0,53333333 | 0,1040833  |
| nsf_food_inta WT           | WT          | NA | 8  | 4  | 4  | 1,1125     | 0,24016363 |
| nsf_latency_fe Neo+ Arc KO | Neo+ Arc KO | NA | 13 | 7  | 6  | 359,076923 | 106,646192 |
| nsf_latency_fe WT          | WT          | NA | 9  | 4  | 5  | 318,777778 | 160,218427 |
| olfactoryAvoi Neo+ Arc KO  | Neo+ Arc KO | NA | 13 | 9  | 4  | 0,69230769 | 2,49615088 |
| olfactoryAvoi WT           | WT          | NA | 20 | 10 | 10 | 0,72005    | 3,22016149 |
| olfactoryAvoi Neo+ Arc KO  | Neo+ Arc KO | NA | 13 | 9  | 4  | 11,8461538 | 5,32049737 |
| olfactoryAvoi WT           | WT          | NA | 20 | 10 | 10 | 6,3        | 4,48506293 |
| olfactoryAvoi Neo+ Arc KO  | Neo+ Arc KO | NA | 13 | 9  | 4  | 24,6436154 | 36,3518573 |
| olfactoryAvoi WT           | WT          | NA | 20 | 10 | 10 | 9,4794     | 8,78092642 |
| olfactoryAvoi Neo+ Arc KO  | Neo+ Arc KO | NA | 13 | 9  | 4  | 2,53846154 | 1,94145069 |
| olfactoryAvoi WT           | WT          | NA | 20 | 10 | 10 | 2,25       | 1,40955387 |
| olfactoryAvoi Neo+ Arc KO  | Neo+ Arc KO | NA | 13 | 9  | 4  | 36,2353846 | 43,2549753 |
| olfactoryAvoi WT           | WT          | NA | 20 | 10 | 10 | 44,9874    | 46,3837376 |
| openField_cer Neo+ Arc KO  | Neo+ Arc KO | NA | 12 | 6  | 6  | 2,80441667 | 1,30885949 |
| openField_cer WT           | WT          | NA | 8  | 4  | 4  | 2,9885     | 1,99286233 |
| openField_cer Neo+ Arc KO  | Neo+ Arc KO | NA | 12 | 6  | 6  | 1,3001553  | 0,21797768 |
| openField_cer WT           | WT          | NA | 8  | 4  | 4  | 1,57410886 | 0,50132334 |
| openField_cer Neo+ Arc KO  | Neo+ Arc KO | NA | 12 | 6  | 6  | 34,3333333 | 11,4123803 |
| openField_cer WT           | WT          | NA | 8  | 4  | 4  | 31,125     | 22,9374148 |
| openField_cer Neo+ Arc KO  | Neo+ Arc KO | NA | 12 | 6  | 6  | 44,5083333 | 15,791048  |
| openField_cer WT           | WT          | NA | 8  | 4  | 4  | 47,65      | 36,6774746 |
| openField_coi Neo+ Arc KO  | Neo+ Arc KO | NA | 12 | 6  | 6  | 13,2575    | 2,79897411 |
| openField_coi WT           | WT          | NA | 8  | 4  | 4  | 16,48425   | 5,57230393 |
| openField_coi Neo+ Arc KO  | Neo+ Arc KO | NA | 12 | 6  | 6  | 11,573491  | 10,1765015 |
| openField_coi WT           | WT          | NA | 8  | 4  | 4  | 10,7238292 | 5,14135144 |
| openField_coi Neo+ Arc KO  | Neo+ Arc KO | NA | 12 | 6  | 6  | 74,25      | 40,6048027 |
| openField_coi WT           | WT          | NA | 8  | 4  | 4  | 61,625     | 31,231566  |
| openField_coi Neo+ Arc KO  | Neo+ Arc KO | NA | 12 | 6  | 6  | 517        | 45,7752613 |
| openField_coi WT           | WT          | NA | 8  | 4  | 4  | 528,1875   | 35,0610666 |
| openField_dis Neo+ Arc KO  | Neo+ Arc KO | NA | 12 | 6  | 6  | 16,5464167 | 4,05943958 |
| openField_dis WT           | WT          | NA | 8  | 4  | 4  | 20,0355    | 7,34477669 |
| openField_im Neo+ Arc KO   | Neo+ Arc KO | NA | 12 | 6  | 6  | 344,233333 | 51,5705577 |
| openField_im WT            | WT          | NA | 8  | 4  | 4  | 343,9      | 76,5661432 |
| openField_lin Neo+ Arc KO  | Neo+ Arc KO | NA | 12 | 6  | 6  | 293,75     | 77,3752662 |

|                           |             |    |    |    |    |            |            |
|---------------------------|-------------|----|----|----|----|------------|------------|
| openField_lin WT          | WT          | NA | 8  | 4  | 4  | 382,375    | 109,821852 |
| openField_mε Neo+ Arc KO  | Neo+ Arc KO | NA | 12 | 6  | 6  | 0,02758333 | 0,00673469 |
| openField_mε WT           | WT          | NA | 8  | 4  | 4  | 0,0335     | 0,01236354 |
| p1_chA_numt Neo+ Arc KO   | Neo+ Arc KO | NA | 12 | 6  | 6  | 20,6666667 | 7,07535201 |
| p1_chA_numt Neo- Arc KO   | Neo- Arc KO | NA | 14 | 7  | 7  | 14,8571429 | 7,20957849 |
| p1_chA_numt WT            | WT          | NA | 26 | 12 | 14 | 21,7692308 | 11,4028337 |
| p1_chA_timeε Neo+ Arc KO  | Neo+ Arc KO | NA | 12 | 6  | 6  | 187,233333 | 42,9298229 |
| p1_chA_timeε Neo- Arc KO  | Neo- Arc KO | NA | 14 | 7  | 7  | 157,042857 | 72,4925112 |
| p1_chA_timeε WT           | WT          | NA | 26 | 12 | 14 | 162,561538 | 64,7004487 |
| p1_chB_numt Neo+ Arc KO   | Neo+ Arc KO | NA | 12 | 6  | 6  | 19,5833333 | 6,68047812 |
| p1_chB_numt Neo- Arc KO   | Neo- Arc KO | NA | 14 | 7  | 7  | 11,9285714 | 4,85900094 |
| p1_chB_numt WT            | WT          | NA | 26 | 12 | 14 | 19         | 9,20869155 |
| p1_chB_timeε Neo+ Arc KO  | Neo+ Arc KO | NA | 12 | 6  | 6  | 163,691667 | 60,1697819 |
| p1_chB_timeε Neo- Arc KO  | Neo- Arc KO | NA | 14 | 7  | 7  | 159,242857 | 99,4196136 |
| p1_chB_timeε WT           | WT          | NA | 26 | 12 | 14 | 149,796154 | 65,4787201 |
| p1_chamberC Neo+ Arc KO   | Neo+ Arc KO | NA | 12 | 6  | 6  | 109,416667 | 23,3272308 |
| p1_chamberC Neo- Arc KO   | Neo- Arc KO | NA | 14 | 7  | 7  | 283,714286 | 87,4636879 |
| p1_chamberC WT            | WT          | NA | 26 | 12 | 14 | 256,25     | 120,292887 |
| p1_cyA_numt Neo+ Arc KO   | Neo+ Arc KO | NA | 12 | 6  | 6  | 40,0833333 | 20,5976977 |
| p1_cyA_numt Neo- Arc KO   | Neo- Arc KO | NA | 14 | 7  | 7  | 47,7142857 | 31,6651436 |
| p1_cyA_numt WT            | WT          | NA | 26 | 12 | 14 | 52,8461538 | 24,5319258 |
| p1_cyA_timeε Neo+ Arc KO  | Neo+ Arc KO | NA | 12 | 6  | 6  | 93,8333333 | 40,8314347 |
| p1_cyA_timeε Neo- Arc KO  | Neo- Arc KO | NA | 14 | 7  | 7  | 82,7428571 | 49,8476867 |
| p1_cyA_timeε WT           | WT          | NA | 26 | 12 | 14 | 83,3730769 | 42,4466965 |
| p1_cyB_numt Neo+ Arc KO   | Neo+ Arc KO | NA | 12 | 6  | 6  | 30,25      | 16,1421245 |
| p1_cyB_numt Neo- Arc KO   | Neo- Arc KO | NA | 14 | 7  | 7  | 52,3571429 | 30,8560109 |
| p1_cyB_numt WT            | WT          | NA | 26 | 12 | 14 | 46,7692308 | 27,4157731 |
| p1_cyB_timeε Neo+ Arc KO  | Neo+ Arc KO | NA | 12 | 6  | 6  | 61,7666667 | 30,675259  |
| p1_cyB_timeε Neo- Arc KO  | Neo- Arc KO | NA | 14 | 7  | 7  | 86,0357143 | 62,739763  |
| p1_cyB_timeε WT           | WT          | NA | 26 | 12 | 14 | 85,9307692 | 63,968941  |
| p1_immobilit Neo+ Arc KO  | Neo+ Arc KO | NA | 12 | 6  | 6  | 1,88333333 | 4,59185709 |
| p1_immobilit Neo- Arc KO  | Neo- Arc KO | NA | 14 | 7  | 7  | 41,9142857 | 35,1276323 |
| p1_immobilit WT           | WT          | NA | 26 | 12 | 14 | 13,8192308 | 16,576152  |
| p1_preferencε Neo+ Arc KO | Neo+ Arc KO | NA | 12 | 6  | 6  | 0,41556325 | 0,18678553 |
| p1_preferencε Neo- Arc KO | Neo- Arc KO | NA | 14 | 7  | 7  | 0,49741508 | 0,26749472 |
| p1_preferencε WT          | WT          | NA | 26 | 12 | 14 | 0,48814505 | 0,20813313 |
| p2_chM_num Neo+ Arc KO    | Neo+ Arc KO | NA | 12 | 6  | 6  | 8,25       | 2,13733054 |
| p2_chM_num Neo- Arc KO    | Neo- Arc KO | NA | 14 | 7  | 7  | 4,64285714 | 1,78054196 |
| p2_chM_num WT             | WT          | NA | 26 | 12 | 14 | 10,2307692 | 4,2923904  |
| p2_chM_time Neo+ Arc KO   | Neo+ Arc KO | NA | 12 | 6  | 6  | 307,426917 | 81,7753029 |
| p2_chM_time Neo- Arc KO   | Neo- Arc KO | NA | 14 | 7  | 7  | 377,828786 | 115,577672 |
| p2_chM_time WT            | WT          | NA | 26 | 12 | 14 | 317,603077 | 95,0501966 |
| p2_chT_numt Neo+ Arc KO   | Neo+ Arc KO | NA | 12 | 6  | 6  | 7,58333333 | 2,3915888  |
| p2_chT_numt Neo- Arc KO   | Neo- Arc KO | NA | 14 | 7  | 7  | 3,85714286 | 1,40642169 |
| p2_chT_numt WT            | WT          | NA | 26 | 12 | 14 | 8,76923077 | 4,35713385 |
| p2_chT_timeε Neo+ Arc KO  | Neo+ Arc KO | NA | 12 | 6  | 6  | 197,23425  | 63,7334182 |
| p2_chT_timeε Neo- Arc KO  | Neo- Arc KO | NA | 14 | 7  | 7  | 177,820857 | 108,945452 |
| p2_chT_timeε WT           | WT          | NA | 26 | 12 | 14 | 185,986385 | 91,2791965 |
| p2_chamberC Neo+ Arc KO   | Neo+ Arc KO | NA | 12 | 6  | 6  | 95,3388333 | 33,881078  |
| p2_chamberC Neo- Arc KO   | Neo- Arc KO | NA | 14 | 7  | 7  | 44,3503571 | 39,1838792 |
| p2_chamberC WT            | WT          | NA | 26 | 12 | 14 | 96,4105385 | 33,6495444 |
| p2_cyM_num Neo+ Arc KO    | Neo+ Arc KO | NA | 12 | 6  | 6  | 30,5833333 | 13,2490709 |
| p2_cyM_num Neo- Arc KO    | Neo- Arc KO | NA | 14 | 7  | 7  | 31,2857143 | 13,1992341 |
| p2_cyM_num WT             | WT          | NA | 26 | 12 | 14 | 48,1538462 | 25,0354825 |
| p2_cyM_time Neo+ Arc KO   | Neo+ Arc KO | NA | 12 | 6  | 6  | 52,7860833 | 23,280035  |
| p2_cyM_time Neo- Arc KO   | Neo- Arc KO | NA | 14 | 7  | 7  | 66,2522857 | 38,1345816 |
| p2_cyM_time WT            | WT          | NA | 26 | 12 | 14 | 81,5787308 | 37,9786413 |
| p2_cyT_numt Neo+ Arc KO   | Neo+ Arc KO | NA | 12 | 6  | 6  | 17,0833333 | 6,24439142 |
| p2_cyT_numt Neo- Arc KO   | Neo- Arc KO | NA | 14 | 7  | 7  | 11,8571429 | 5,06658955 |
| p2_cyT_numt WT            | WT          | NA | 26 | 12 | 14 | 16,2307692 | 6,94151391 |
| p2_cyT_timeS Neo+ Arc KO  | Neo+ Arc KO | NA | 12 | 6  | 6  | 24,2569167 | 10,9995936 |
| p2_cyT_timeS Neo- Arc KO  | Neo- Arc KO | NA | 14 | 7  | 7  | 14,3639286 | 5,65092276 |
| p2_cyT_timeS WT           | WT          | NA | 26 | 12 | 14 | 18,7379231 | 9,63939461 |
| p2_immobilit Neo+ Arc KO  | Neo+ Arc KO | NA | 12 | 6  | 6  | 5,58541667 | 5,7685244  |
| p2_immobilit Neo- Arc KO  | Neo- Arc KO | NA | 14 | 7  | 7  | 28,4383571 | 36,3144801 |
| p2_immobilit WT           | WT          | NA | 26 | 12 | 14 | 8,87523077 | 17,4551709 |
| p2_preferencε Neo+ Arc KO | Neo+ Arc KO | NA | 12 | 6  | 6  | 0,67678233 | 0,09093937 |
| p2_preferencε Neo- Arc KO | Neo- Arc KO | NA | 14 | 7  | 7  | 0,80197228 | 0,0935761  |
| p2_preferencε WT          | WT          | NA | 26 | 12 | 14 | 0,78627622 | 0,14090102 |
| p2_selfGroom Neo+ Arc KO  | Neo+ Arc KO | NA | 12 | 6  | 6  | 2          | 0,95346259 |

|                            |             |    |    |    |    |            |            |
|----------------------------|-------------|----|----|----|----|------------|------------|
| p2_selfGroom Neo- Arc KO   | Neo- Arc KO | NA | 14 | 7  | 7  | 1,92857143 | 1,49173547 |
| p2_selfGroom WT            | WT          | NA | 26 | 12 | 14 | 1,38461538 | 0,94135745 |
| p2_selfGroom Neo+ Arc KO   | Neo+ Arc KO | NA | 12 | 6  | 6  | 50,9426667 | 33,3634133 |
| p2_selfGroom Neo- Arc KO   | Neo- Arc KO | NA | 14 | 7  | 7  | 39,787     | 41,8913099 |
| p2_selfGroom WT            | WT          | NA | 26 | 12 | 14 | 31,9846154 | 38,5960713 |
| p3_chM_num Neo+ Arc KO     | Neo+ Arc KO | NA | 12 | 6  | 6  | 7,5        | 2,39317211 |
| p3_chM_num WT              | WT          | NA | 8  | 4  | 4  | 13,75      | 2,12132034 |
| p3_chM_time Neo+ Arc KO    | Neo+ Arc KO | NA | 12 | 6  | 6  | 234,263083 | 100,154595 |
| p3_chM_time WT             | WT          | NA | 8  | 4  | 4  | 241,914    | 71,6900533 |
| p3_chN_num Neo+ Arc KO     | Neo+ Arc KO | NA | 12 | 6  | 6  | 8,41666667 | 2,96826651 |
| p3_chN_num WT              | WT          | NA | 8  | 4  | 4  | 13,375     | 2,61520281 |
| p3_chN_time Neo+ Arc KO    | Neo+ Arc KO | NA | 12 | 6  | 6  | 255,547167 | 103,829752 |
| p3_chN_time WT             | WT          | NA | 8  | 4  | 4  | 241,086    | 61,8533486 |
| p3_chamberC Neo+ Arc KO    | Neo+ Arc KO | NA | 12 | 6  | 6  | 110,18975  | 43,2169856 |
| p3_chamberC WT             | WT          | NA | 8  | 4  | 4  | 117        | 53,5606509 |
| p3_cyM_dura Neo+ Arc KO    | Neo+ Arc KO | NA | 12 | 6  | 6  | 1,238      | 0,37499139 |
| p3_cyM_dura WT             | WT          | NA | 8  | 4  | 4  | 1,32975    | 0,37258585 |
| p3_cyM_num Neo+ Arc KO     | Neo+ Arc KO | NA | 12 | 6  | 6  | 17,8333333 | 9,20309566 |
| p3_cyM_num WT              | WT          | NA | 8  | 4  | 4  | 26,375     | 15,8288841 |
| p3_cyM_time Neo+ Arc KO    | Neo+ Arc KO | NA | 12 | 6  | 6  | 22,4191667 | 13,9191487 |
| p3_cyM_time WT             | WT          | NA | 8  | 4  | 4  | 37,8675    | 30,4516552 |
| p3_cyN_durat Neo+ Arc KO   | Neo+ Arc KO | NA | 12 | 6  | 6  | 2,1405     | 0,63840917 |
| p3_cyN_durat WT            | WT          | NA | 8  | 4  | 4  | 1,86975    | 0,41958066 |
| p3_cyN_num Neo+ Arc KO     | Neo+ Arc KO | NA | 12 | 6  | 6  | 26,25      | 12,2409521 |
| p3_cyN_num WT              | WT          | NA | 8  | 4  | 4  | 31,5       | 14,1824842 |
| p3_cyN_time Neo+ Arc KO    | Neo+ Arc KO | NA | 12 | 6  | 6  | 55,25125   | 26,0374167 |
| p3_cyN_time WT             | WT          | NA | 8  | 4  | 4  | 56,122125  | 21,9152501 |
| p3_immobilit Neo+ Arc KO   | Neo+ Arc KO | NA | 12 | 6  | 6  | 2,12441667 | 4,12314173 |
| p3_immobilit WT            | WT          | NA | 8  | 4  | 4  | 0,186375   | 0,52714811 |
| p3_preferenc Neo+ Arc KO   | Neo+ Arc KO | NA | 12 | 6  | 6  | 0,70674137 | 0,12762723 |
| p3_preferenc WT            | WT          | NA | 8  | 4  | 4  | 0,61920076 | 0,16714509 |
| p3_selfGroom Neo+ Arc KO   | Neo+ Arc KO | NA | 12 | 6  | 6  | 39,8575833 | 39,3479704 |
| p3_selfGroom WT            | WT          | NA | 8  | 4  | 4  | 20,3435    | 14,1046986 |
| p3_selfGroom Neo+ Arc KO   | Neo+ Arc KO | NA | 12 | 6  | 6  | 2,33333333 | 1,23091491 |
| p3_selfGroom WT            | WT          | NA | 8  | 4  | 4  | 1,5        | 0,9258201  |
| p3_selfGroom Neo+ Arc KO   | Neo+ Arc KO | NA | 12 | 6  | 6  | 88,7108333 | 81,5491727 |
| p3_selfGroom WT            | WT          | NA | 8  | 4  | 4  | 35,561125  | 28,1194503 |
| p4_chMa_nur Neo+ Arc KO    | Neo+ Arc KO | NA | 12 | 6  | 6  | 8,58333333 | 2,50302847 |
| p4_chMa_nur WT             | WT          | NA | 8  | 4  | 4  | 12,75      | 2,54950976 |
| p4_chMa_tim Neo+ Arc KO    | Neo+ Arc KO | NA | 12 | 6  | 6  | 189,6565   | 77,2508742 |
| p4_chMa_tim WT             | WT          | NA | 8  | 4  | 4  | 272,138    | 97,0659564 |
| p4_chN_num Neo+ Arc KO     | Neo+ Arc KO | NA | 12 | 6  | 6  | 8,33333333 | 2,80691786 |
| p4_chN_num WT              | WT          | NA | 8  | 4  | 4  | 11,625     | 3,5831949  |
| p4_chN_time Neo+ Arc KO    | Neo+ Arc KO | NA | 12 | 6  | 6  | 275,9305   | 99,9902224 |
| p4_chN_time WT             | WT          | NA | 8  | 4  | 4  | 219,26     | 86,8499808 |
| p4_chamberC Neo+ Arc KO    | Neo+ Arc KO | NA | 12 | 6  | 6  | 134,413    | 80,3076197 |
| p4_chamberC WT             | WT          | NA | 8  | 4  | 4  | 108,602    | 23,882021  |
| p4_cyMa_dur Neo+ Arc KO    | Neo+ Arc KO | NA | 12 | 6  | 6  | 1,41033333 | 0,30219059 |
| p4_cyMa_dur WT             | WT          | NA | 8  | 4  | 4  | 1,372125   | 0,40866488 |
| p4_cyMa_nun Neo+ Arc KO    | Neo+ Arc KO | NA | 12 | 6  | 6  | 22         | 9,31274786 |
| p4_cyMa_nun WT             | WT          | NA | 8  | 4  | 4  | 26,625     | 7,46300399 |
| p4_cyMa_tim Neo+ Arc KO    | Neo+ Arc KO | NA | 12 | 6  | 6  | 31,7540833 | 15,8247388 |
| p4_cyMa_tim WT             | WT          | NA | 8  | 4  | 4  | 38,1835    | 23,6502661 |
| p4_cyN_durat Neo+ Arc KO   | Neo+ Arc KO | NA | 12 | 6  | 6  | 1,33133333 | 0,53610402 |
| p4_cyN_durat WT            | WT          | NA | 8  | 4  | 4  | 1,156625   | 0,3359111  |
| p4_cyN_num Neo+ Arc KO     | Neo+ Arc KO | NA | 12 | 6  | 6  | 17,1666667 | 5,55686853 |
| p4_cyN_num WT              | WT          | NA | 8  | 4  | 4  | 22,5       | 10,743769  |
| p4_cyN_time Neo+ Arc KO    | Neo+ Arc KO | NA | 12 | 6  | 6  | 22,9630833 | 11,7866741 |
| p4_cyN_time WT             | WT          | NA | 8  | 4  | 4  | 27,008     | 18,1754493 |
| p4_immobilit Neo+ Arc KO   | Neo+ Arc KO | NA | 12 | 6  | 6  | 6,2925     | 9,52547995 |
| p4_immobilit WT            | WT          | NA | 8  | 4  | 4  | 0,314      | 0,88812612 |
| p4_preferenc Neo+ Arc KO   | Neo+ Arc KO | NA | 12 | 6  | 6  | 0,57228236 | 0,1351576  |
| p4_preferenc WT            | WT          | NA | 8  | 4  | 4  | 0,58973517 | 0,16658549 |
| p4_selfGroom Neo+ Arc KO   | Neo+ Arc KO | NA | 12 | 6  | 6  | 51,4800833 | 41,4492212 |
| p4_selfGroom WT            | WT          | NA | 8  | 4  | 4  | 21,969375  | 17,7338007 |
| p4_selfGroom Neo+ Arc KO   | Neo+ Arc KO | NA | 12 | 6  | 6  | 2,25       | 0,75377836 |
| p4_selfGroom WT            | WT          | NA | 8  | 4  | 4  | 2          | 0,9258201  |
| p4_selfGroom Neo+ Arc KO   | Neo+ Arc KO | NA | 12 | 6  | 6  | 112,908417 | 80,8269002 |
| p4_selfGroom WT            | WT          | NA | 8  | 4  | 4  | 48,937875  | 51,6385518 |
| residentIntruc Neo+ Arc KO | Neo+ Arc KO | NA | 7  | 0  | 7  | 3,07728571 | 3,63722819 |

|                            |             |    |   |   |   |            |            |
|----------------------------|-------------|----|---|---|---|------------|------------|
| residentIntruc WT          | WT          | NA | 8 | 0 | 8 | 3,977875   | 6,35061033 |
| residentIntruc Neo+ Arc KO | Neo+ Arc KO | NA | 7 | 0 | 7 | 224,629857 | 72,8783265 |
| residentIntruc WT          | WT          | NA | 8 | 0 | 8 | 258,434    | 70,8521517 |
| residentIntruc Neo+ Arc KO | Neo+ Arc KO | NA | 7 | 0 | 7 | 3,42857143 | 3,82348632 |
| residentIntruc WT          | WT          | NA | 8 | 0 | 8 | 1,875      | 2,58774585 |
| residentIntruc Neo+ Arc KO | Neo+ Arc KO | NA | 7 | 0 | 7 | 20,8702857 | 26,8849629 |
| residentIntruc WT          | WT          | NA | 8 | 0 | 8 | 9,350625   | 11,9786161 |
| residentIntruc Neo+ Arc KO | Neo+ Arc KO | NA | 7 | 0 | 7 | 0,74757143 | 1,10771234 |
| residentIntruc WT          | WT          | NA | 8 | 0 | 8 | 3,462875   | 2,22038545 |
| residentIntruc Neo+ Arc KO | Neo+ Arc KO | NA | 7 | 0 | 7 | 231,725    | 104,978982 |
| residentIntruc WT          | WT          | NA | 8 | 0 | 8 | 155,639375 | 104,882015 |
| residentIntruc Neo+ Arc KO | Neo+ Arc KO | NA | 7 | 0 | 7 | 3,28571429 | 6,23736819 |
| residentIntruc WT          | WT          | NA | 8 | 0 | 8 | 6,5        | 5,23722937 |
| residentIntruc Neo+ Arc KO | Neo+ Arc KO | NA | 7 | 0 | 7 | 8,13885714 | 18,5287161 |
| residentIntruc WT          | WT          | NA | 8 | 0 | 8 | 30,31375   | 25,9908027 |
| socialMemory Neo+ Arc KO   | Neo+ Arc KO | NA | 8 | 4 | 4 | 0          | 0          |
| socialMemory WT            | WT          | NA | 9 | 4 | 5 | 0,11111111 | 0,33333333 |
| socialMemory Neo+ Arc KO   | Neo+ Arc KO | NA | 8 | 4 | 4 | 1,0115     | 0,74833873 |
| socialMemory WT            | WT          | NA | 9 | 4 | 5 | 1,08733333 | 0,60724727 |
| socialMemory Neo+ Arc KO   | Neo+ Arc KO | NA | 8 | 4 | 4 | 3,5        | 3,07059789 |
| socialMemory WT            | WT          | NA | 9 | 4 | 5 | 2,22222222 | 2,10818511 |
| socialMemory Neo+ Arc KO   | Neo+ Arc KO | NA | 8 | 4 | 4 | 4,47675    | 3,96677418 |
| socialMemory WT            | WT          | NA | 9 | 4 | 5 | 3,38066667 | 4,87652968 |
| socialMemory Neo+ Arc KO   | Neo+ Arc KO | NA | 8 | 4 | 4 | 1,065      | 0,29517646 |
| socialMemory WT            | WT          | NA | 9 | 4 | 5 | 1,56666667 | 0,70000714 |
| socialMemory Neo+ Arc KO   | Neo+ Arc KO | NA | 8 | 4 | 4 | 20,75      | 9,77971662 |
| socialMemory WT            | WT          | NA | 9 | 4 | 5 | 28,2222222 | 11,0428458 |
| socialMemory Neo+ Arc KO   | Neo+ Arc KO | NA | 8 | 4 | 4 | 22,4925    | 12,4864461 |
| socialMemory WT            | WT          | NA | 9 | 4 | 5 | 48,9362222 | 36,1582821 |
| socialMemory Neo+ Arc KO   | Neo+ Arc KO | NA | 8 | 4 | 4 | 0,7665     | 0,6068217  |
| socialMemory WT            | WT          | NA | 9 | 4 | 5 | 0,79344444 | 0,75421004 |
| socialMemory Neo+ Arc KO   | Neo+ Arc KO | NA | 8 | 4 | 4 | 4,25       | 5,8002463  |
| socialMemory WT            | WT          | NA | 9 | 4 | 5 | 3,55555556 | 3,43187671 |
| socialMemory Neo+ Arc KO   | Neo+ Arc KO | NA | 8 | 4 | 4 | 5,00625    | 8,01193144 |
| socialMemory WT            | WT          | NA | 9 | 4 | 5 | 4,13022222 | 5,2540062  |
| socialMemory Neo+ Arc KO   | Neo+ Arc KO | NA | 8 | 4 | 4 | 24         | 7,92824967 |
| socialMemory WT            | WT          | NA | 9 | 4 | 5 | 16,7777778 | 11,47582   |
| socialMemory Neo+ Arc KO   | Neo+ Arc KO | NA | 8 | 4 | 4 | 2,576      | 4,10117098 |
| socialMemory WT            | WT          | NA | 9 | 4 | 5 | 3,80755556 | 6,13259974 |
| socialMemory Neo+ Arc KO   | Neo+ Arc KO | NA | 8 | 4 | 4 | 0,375      | 0,51754917 |
| socialMemory WT            | WT          | NA | 9 | 4 | 5 | 0,66666667 | 1          |
| socialMemory Neo+ Arc KO   | Neo+ Arc KO | NA | 8 | 4 | 4 | 2,576      | 4,10117098 |
| socialMemory WT            | WT          | NA | 9 | 4 | 5 | 5,181      | 7,86875929 |
| socialMemory Neo+ Arc KO   | Neo+ Arc KO | NA | 8 | 4 | 4 | 6,91925    | 8,27267833 |
| socialMemory WT            | WT          | NA | 9 | 4 | 5 | 3,16566667 | 5,46774188 |
| socialMemory Neo+ Arc KO   | Neo+ Arc KO | NA | 8 | 4 | 4 | 0,5        | 0,53452248 |
| socialMemory WT            | WT          | NA | 9 | 4 | 5 | 0,44444444 | 0,72648316 |
| socialMemory Neo+ Arc KO   | Neo+ Arc KO | NA | 8 | 4 | 4 | 6,91925    | 8,27267833 |
| socialMemory WT            | WT          | NA | 9 | 4 | 5 | 3,691      | 5,85025412 |
| socialMemory Neo+ Arc KO   | Neo+ Arc KO | NA | 8 | 4 | 4 | 2,5        | 4,53557368 |
| socialMemory WT            | WT          | NA | 9 | 4 | 5 | 1,22222222 | 2,99072641 |
| socialMemory Neo+ Arc KO   | Neo+ Arc KO | NA | 8 | 4 | 4 | 0,684375   | 0,51698216 |
| socialMemory WT            | WT          | NA | 9 | 4 | 5 | 0,80488889 | 1,8560065  |
| socialMemory Neo+ Arc KO   | Neo+ Arc KO | NA | 8 | 4 | 4 | 1,25       | 1,03509834 |
| socialMemory WT            | WT          | NA | 9 | 4 | 5 | 0,66666667 | 1,11803399 |
| socialMemory Neo+ Arc KO   | Neo+ Arc KO | NA | 8 | 4 | 4 | 1,192625   | 1,28456929 |
| socialMemory WT            | WT          | NA | 9 | 4 | 5 | 2,15       | 5,59872264 |
| socialMemory Neo+ Arc KO   | Neo+ Arc KO | NA | 8 | 4 | 4 | 1,093375   | 0,359734   |
| socialMemory WT            | WT          | NA | 9 | 4 | 5 | 1,21644444 | 0,44289477 |
| socialMemory Neo+ Arc KO   | Neo+ Arc KO | NA | 8 | 4 | 4 | 15,75      | 6,94365075 |
| socialMemory WT            | WT          | NA | 9 | 4 | 5 | 16         | 8,54400375 |
| socialMemory Neo+ Arc KO   | Neo+ Arc KO | NA | 8 | 4 | 4 | 16,427125  | 8,29219456 |
| socialMemory WT            | WT          | NA | 9 | 4 | 5 | 22,3807778 | 15,0799589 |
| socialMemory Neo+ Arc KO   | Neo+ Arc KO | NA | 8 | 4 | 4 | 1,7365     | 0,86241173 |
| socialMemory WT            | WT          | NA | 9 | 4 | 5 | 1,63444444 | 1,79712166 |
| socialMemory Neo+ Arc KO   | Neo+ Arc KO | NA | 8 | 4 | 4 | 5,75       | 5,94618725 |
| socialMemory WT            | WT          | NA | 9 | 4 | 5 | 4          | 4,41588043 |
| socialMemory Neo+ Arc KO   | Neo+ Arc KO | NA | 8 | 4 | 4 | 11,455375  | 14,0415795 |
| socialMemory WT            | WT          | NA | 9 | 4 | 5 | 9,13144444 | 11,3794784 |
| socialMemory Neo+ Arc KO   | Neo+ Arc KO | NA | 8 | 4 | 4 | 13,75      | 6,73477118 |

|                         |            |    |   |   |   |            |            |
|-------------------------|------------|----|---|---|---|------------|------------|
| socialMemory_WT         | WT         | NA | 9 | 4 | 5 | 13,5555556 | 9,01541889 |
| socialMemory_Neo+Arc_KO | Neo+Arc_KO | NA | 8 | 4 | 4 | 0          | 0          |
| socialMemory_WT         | WT         | NA | 9 | 4 | 5 | 4,02111111 | 6,62017582 |
| socialMemory_Neo+Arc_KO | Neo+Arc_KO | NA | 8 | 4 | 4 | 0          | 0          |
| socialMemory_WT         | WT         | NA | 9 | 4 | 5 | 0,55555556 | 1,01379376 |
| socialMemory_Neo+Arc_KO | Neo+Arc_KO | NA | 8 | 4 | 4 | 0          | 0          |
| socialMemory_WT         | WT         | NA | 9 | 4 | 5 | 5,68155556 | 9,02955871 |
| socialMemory_Neo+Arc_KO | Neo+Arc_KO | NA | 8 | 4 | 4 | 12,776125  | 22,5398887 |
| socialMemory_WT         | WT         | NA | 9 | 4 | 5 | 2,37011111 | 6,0764955  |
| socialMemory_Neo+Arc_KO | Neo+Arc_KO | NA | 8 | 4 | 4 | 0,5        | 0,75592895 |
| socialMemory_WT         | WT         | NA | 9 | 4 | 5 | 0,22222222 | 0,44095855 |
| socialMemory_Neo+Arc_KO | Neo+Arc_KO | NA | 8 | 4 | 4 | 17,754875  | 31,8470513 |
| socialMemory_WT         | WT         | NA | 9 | 4 | 5 | 2,37011111 | 6,0764955  |
| socialMemory_Neo+Arc_KO | Neo+Arc_KO | NA | 8 | 4 | 4 | 0,5        | 1,41421356 |
| socialMemory_WT         | WT         | NA | 9 | 4 | 5 | 0,44444444 | 1,01379376 |
| socialMemory_Neo+Arc_KO | Neo+Arc_KO | NA | 8 | 4 | 4 | 0,498875   | 0,54904734 |
| socialMemory_WT         | WT         | NA | 9 | 4 | 5 | 0,23655556 | 0,47936862 |
| socialMemory_Neo+Arc_KO | Neo+Arc_KO | NA | 8 | 4 | 4 | 1,5        | 1,41421356 |
| socialMemory_WT         | WT         | NA | 9 | 4 | 5 | 0,66666667 | 1,32287566 |
| socialMemory_Neo+Arc_KO | Neo+Arc_KO | NA | 8 | 4 | 4 | 1,26       | 1,43924117 |
| socialMemory_WT         | WT         | NA | 9 | 4 | 5 | 0,70988889 | 1,43853766 |
| socialMemory_Neo+Arc_KO | Neo+Arc_KO | NA | 8 | 4 | 4 | 0,980875   | 0,28247601 |
| socialMemory_WT         | WT         | NA | 9 | 4 | 5 | 0,98766667 | 0,52901323 |
| socialMemory_Neo+Arc_KO | Neo+Arc_KO | NA | 8 | 4 | 4 | 17,5       | 6,92820323 |
| socialMemory_WT         | WT         | NA | 9 | 4 | 5 | 13,8888889 | 7,57371185 |
| socialMemory_Neo+Arc_KO | Neo+Arc_KO | NA | 8 | 4 | 4 | 18,079625  | 9,60734073 |
| socialMemory_WT         | WT         | NA | 9 | 4 | 5 | 15,8122222 | 9,33984642 |
| socialMemory_Neo+Arc_KO | Neo+Arc_KO | NA | 8 | 4 | 4 | 0,497625   | 0,589595   |
| socialMemory_WT         | WT         | NA | 9 | 4 | 5 | 0,59055556 | 0,60584551 |
| socialMemory_Neo+Arc_KO | Neo+Arc_KO | NA | 8 | 4 | 4 | 2,875      | 5,19443383 |
| socialMemory_WT         | WT         | NA | 9 | 4 | 5 | 1,44444444 | 1,33333333 |
| socialMemory_Neo+Arc_KO | Neo+Arc_KO | NA | 8 | 4 | 4 | 2,8235     | 4,8727113  |
| socialMemory_WT         | WT         | NA | 9 | 4 | 5 | 1,24077778 | 1,87731882 |
| socialMemory_Neo+Arc_KO | Neo+Arc_KO | NA | 8 | 4 | 4 | 21,875     | 12,6878739 |
| socialMemory_WT         | WT         | NA | 9 | 4 | 5 | 16,5555556 | 8,70504324 |
| socialMemory_Neo+Arc_KO | Neo+Arc_KO | NA | 8 | 4 | 4 | 0          | 0          |
| socialMemory_WT         | WT         | NA | 9 | 4 | 5 | 0,26       | 0,78       |
| socialMemory_Neo+Arc_KO | Neo+Arc_KO | NA | 8 | 4 | 4 | 0          | 0          |
| socialMemory_WT         | WT         | NA | 9 | 4 | 5 | 0,11111111 | 0,33333333 |
| socialMemory_Neo+Arc_KO | Neo+Arc_KO | NA | 8 | 4 | 4 | 0          | 0          |
| socialMemory_WT         | WT         | NA | 9 | 4 | 5 | 0,26       | 0,78       |
| socialMemory_Neo+Arc_KO | Neo+Arc_KO | NA | 8 | 4 | 4 | 8,15725    | 16,6521849 |
| socialMemory_WT         | WT         | NA | 9 | 4 | 5 | 10,3206667 | 11,6255527 |
| socialMemory_Neo+Arc_KO | Neo+Arc_KO | NA | 8 | 4 | 4 | 0,625      | 0,74402381 |
| socialMemory_WT         | WT         | NA | 9 | 4 | 5 | 0,66666667 | 0,5        |
| socialMemory_Neo+Arc_KO | Neo+Arc_KO | NA | 8 | 4 | 4 | 14,188125  | 33,4798203 |
| socialMemory_WT         | WT         | NA | 9 | 4 | 5 | 10,3206667 | 11,6255527 |
| socialMemory_Neo+Arc_KO | Neo+Arc_KO | NA | 8 | 4 | 4 | 1,5        | 3,2071349  |
| socialMemory_WT         | WT         | NA | 9 | 4 | 5 | 2,55555556 | 5,41089436 |
| socialMemory_Neo+Arc_KO | Neo+Arc_KO | NA | 8 | 4 | 4 | 0,4135     | 0,45686978 |
| socialMemory_WT         | WT         | NA | 9 | 4 | 5 | 0,313      | 0,34506195 |
| socialMemory_Neo+Arc_KO | Neo+Arc_KO | NA | 8 | 4 | 4 | 1          | 1,41421356 |
| socialMemory_WT         | WT         | NA | 9 | 4 | 5 | 1,55555556 | 2,00693243 |
| socialMemory_Neo+Arc_KO | Neo+Arc_KO | NA | 8 | 4 | 4 | 0,776375   | 1,0448669  |
| socialMemory_WT         | WT         | NA | 9 | 4 | 5 | 0,92955556 | 1,23838939 |
| socialMemory_Neo+Arc_KO | Neo+Arc_KO | NA | 8 | 4 | 4 | 1,151125   | 0,28515331 |
| socialMemory_WT         | WT         | NA | 9 | 4 | 5 | 1,04988889 | 0,25943951 |
| socialMemory_Neo+Arc_KO | Neo+Arc_KO | NA | 8 | 4 | 4 | 16,625     | 6,23211727 |
| socialMemory_WT         | WT         | NA | 9 | 4 | 5 | 22,7777778 | 13,6269749 |
| socialMemory_Neo+Arc_KO | Neo+Arc_KO | NA | 8 | 4 | 4 | 18,699875  | 6,66953308 |
| socialMemory_WT         | WT         | NA | 9 | 4 | 5 | 25,9447778 | 18,4907492 |
| socialMemory_Neo+Arc_KO | Neo+Arc_KO | NA | 8 | 4 | 4 | 2,187875   | 2,74586913 |
| socialMemory_WT         | WT         | NA | 9 | 4 | 5 | 1,205      | 0,89621245 |
| socialMemory_Neo+Arc_KO | Neo+Arc_KO | NA | 8 | 4 | 4 | 4,625      | 2,82526863 |
| socialMemory_WT         | WT         | NA | 9 | 4 | 5 | 2,77777778 | 2,68224616 |
| socialMemory_Neo+Arc_KO | Neo+Arc_KO | NA | 8 | 4 | 4 | 12,939125  | 17,8091822 |
| socialMemory_WT         | WT         | NA | 9 | 4 | 5 | 4,56022222 | 4,87204715 |
| socialMemory_Neo+Arc_KO | Neo+Arc_KO | NA | 8 | 4 | 4 | 14,875     | 8,54295867 |
| socialMemory_WT         | WT         | NA | 9 | 4 | 5 | 10,6666667 | 5          |
| socialMemory_Neo+Arc_KO | Neo+Arc_KO | NA | 8 | 4 | 4 | 2,047625   | 5,79155809 |

|                           |            |    |    |    |    |            |            |
|---------------------------|------------|----|----|----|----|------------|------------|
| socialMemory_WT           | WT         | NA | 9  | 4  | 5  | 2,01077778 | 6,03233333 |
| socialMemory_Neo+Arc KO   | Neo+Arc KO | NA | 8  | 4  | 4  | 0,25       | 0,70710678 |
| socialMemory_WT           | WT         | NA | 9  | 4  | 5  | 0,11111111 | 0,33333333 |
| socialMemory_Neo+Arc KO   | Neo+Arc KO | NA | 8  | 4  | 4  | 4,095375   | 11,5834697 |
| socialMemory_WT           | WT         | NA | 9  | 4  | 5  | 2,01077778 | 6,03233333 |
| socialMemory_Neo+Arc KO   | Neo+Arc KO | NA | 8  | 4  | 4  | 17,119125  | 11,479196  |
| socialMemory_WT           | WT         | NA | 9  | 4  | 5  | 3,48044444 | 5,49031634 |
| socialMemory_Neo+Arc KO   | Neo+Arc KO | NA | 8  | 4  | 4  | 1,25       | 0,88640526 |
| socialMemory_WT           | WT         | NA | 9  | 4  | 5  | 0,33333333 | 0,5        |
| socialMemory_Neo+Arc KO   | Neo+Arc KO | NA | 8  | 4  | 4  | 24,70825   | 20,7319972 |
| socialMemory_WT           | WT         | NA | 9  | 4  | 5  | 3,48044444 | 5,49031634 |
| socialOlfactio_Neo+Arc KO | Neo+Arc KO | NA | 8  | 4  | 4  | 0,78775536 | 0,36695235 |
| socialOlfactio_WT         | WT         | NA | 8  | 4  | 4  | 1,28433333 | 0,70646742 |
| socialOlfactio_Neo+Arc KO | Neo+Arc KO | NA | 8  | 4  | 4  | 4,875      | 2,64237447 |
| socialOlfactio_WT         | WT         | NA | 8  | 4  | 4  | 3,5        | 2,44948974 |
| socialOlfactio_Neo+Arc KO | Neo+Arc KO | NA | 8  | 4  | 4  | 3,848375   | 3,56343325 |
| socialOlfactio_WT         | WT         | NA | 8  | 4  | 4  | 4,222375   | 3,01845197 |
| socialOlfactio_Neo+Arc KO | Neo+Arc KO | NA | 8  | 4  | 4  | 0,49533333 | 0,43363778 |
| socialOlfactio_WT         | WT         | NA | 8  | 4  | 4  | 0,6558125  | 0,43898208 |
| socialOlfactio_Neo+Arc KO | Neo+Arc KO | NA | 8  | 4  | 4  | 2          | 2,13808994 |
| socialOlfactio_WT         | WT         | NA | 8  | 4  | 4  | 2,25       | 1,28173989 |
| socialOlfactio_Neo+Arc KO | Neo+Arc KO | NA | 8  | 4  | 4  | 1,248125   | 1,30432253 |
| socialOlfactio_WT         | WT         | NA | 8  | 4  | 4  | 1,790375   | 1,50732866 |
| socialOlfactio_Neo+Arc KO | Neo+Arc KO | NA | 8  | 4  | 4  | 0,3824375  | 0,56878602 |
| socialOlfactio_WT         | WT         | NA | 8  | 4  | 4  | 0,28127083 | 0,29678518 |
| socialOlfactio_Neo+Arc KO | Neo+Arc KO | NA | 8  | 4  | 4  | 1,125      | 1,12599163 |
| socialOlfactio_WT         | WT         | NA | 8  | 4  | 4  | 1,75       | 1,75254916 |
| socialOlfactio_Neo+Arc KO | Neo+Arc KO | NA | 8  | 4  | 4  | 0,9115     | 1,74356007 |
| socialOlfactio_WT         | WT         | NA | 8  | 4  | 4  | 0,87725    | 1,18715648 |
| socialOlfactio_Neo+Arc KO | Neo+Arc KO | NA | 8  | 4  | 4  | 1,34229375 | 0,59509589 |
| socialOlfactio_WT         | WT         | NA | 8  | 4  | 4  | 2,09599868 | 0,60232132 |
| socialOlfactio_Neo+Arc KO | Neo+Arc KO | NA | 8  | 4  | 4  | 4,75       | 2,71240536 |
| socialOlfactio_WT         | WT         | NA | 8  | 4  | 4  | 9          | 4,6291005  |
| socialOlfactio_Neo+Arc KO | Neo+Arc KO | NA | 8  | 4  | 4  | 5,3285     | 2,54845864 |
| socialOlfactio_WT         | WT         | NA | 8  | 4  | 4  | 19,683875  | 13,1992095 |
| socialOlfactio_Neo+Arc KO | Neo+Arc KO | NA | 8  | 4  | 4  | 0,20158333 | 0,37405189 |
| socialOlfactio_WT         | WT         | NA | 8  | 4  | 4  | 1,2946994  | 0,91665869 |
| socialOlfactio_Neo+Arc KO | Neo+Arc KO | NA | 8  | 4  | 4  | 0,75       | 1,16496475 |
| socialOlfactio_WT         | WT         | NA | 8  | 4  | 4  | 4,25       | 2,96407056 |
| socialOlfactio_Neo+Arc KO | Neo+Arc KO | NA | 8  | 4  | 4  | 0,50475    | 1,11968959 |
| socialOlfactio_WT         | WT         | NA | 8  | 4  | 4  | 4,860375   | 3,31456138 |
| socialOlfactio_Neo+Arc KO | Neo+Arc KO | NA | 8  | 4  | 4  | 0,17983333 | 0,29154275 |
| socialOlfactio_WT         | WT         | NA | 8  | 4  | 4  | 0,29814583 | 0,5779002  |
| socialOlfactio_Neo+Arc KO | Neo+Arc KO | NA | 8  | 4  | 4  | 0,625      | 1,06066017 |
| socialOlfactio_WT         | WT         | NA | 8  | 4  | 4  | 1,25       | 2,18762755 |
| socialOlfactio_Neo+Arc KO | Neo+Arc KO | NA | 8  | 4  | 4  | 0,27       | 0,43278896 |
| socialOlfactio_WT         | WT         | NA | 8  | 4  | 4  | 1,451875   | 3,48193528 |
| spatialObject_Neo+Arc KO  | Neo+Arc KO | NA | 15 | 8  | 7  | -0,1176611 | 0,32406328 |
| spatialObject_Neo-Arc KO  | Neo-Arc KO | NA | 16 | 8  | 8  | 0,23524871 | 0,30208091 |
| spatialObject_WT          | WT         | NA | 28 | 16 | 12 | 0,12228213 | 0,42789049 |
| spatialObject_Neo+Arc KO  | Neo+Arc KO | NA | 15 | 8  | 7  | 15,9333333 | 13,5249329 |
| spatialObject_Neo-Arc KO  | Neo-Arc KO | NA | 16 | 8  | 8  | 19,0625    | 10,4592463 |
| spatialObject_WT          | WT         | NA | 28 | 16 | 12 | 21,3214286 | 26,0370869 |
| spatialObject_Neo+Arc KO  | Neo+Arc KO | NA | 15 | 8  | 7  | 20,3066667 | 18,0234952 |
| spatialObject_Neo-Arc KO  | Neo-Arc KO | NA | 16 | 8  | 8  | 17,075     | 12,1169028 |
| spatialObject_WT          | WT         | NA | 28 | 16 | 12 | 21,8857143 | 31,2935293 |
| spatialObject_Neo+Arc KO  | Neo+Arc KO | NA | 15 | 8  | 7  | 17,2666667 | 14,0023807 |
| spatialObject_Neo-Arc KO  | Neo-Arc KO | NA | 16 | 8  | 8  | 26,375     | 14,4585615 |
| spatialObject_WT          | WT         | NA | 28 | 16 | 12 | 22,8928571 | 19,8407349 |
| spatialObject_Neo+Arc KO  | Neo+Arc KO | NA | 15 | 8  | 7  | 18,98      | 18,4583392 |
| spatialObject_Neo-Arc KO  | Neo-Arc KO | NA | 16 | 8  | 8  | 27,08125   | 15,4453539 |
| spatialObject_WT          | WT         | NA | 28 | 16 | 12 | 22,0321429 | 25,2448756 |
| spatialObject_Neo+Arc KO  | Neo+Arc KO | NA | 15 | 8  | 7  | -0,0041315 | 0,48015381 |
| spatialObject_Neo-Arc KO  | Neo-Arc KO | NA | 15 | 7  | 8  | 0,08595122 | 0,61364594 |
| spatialObject_WT          | WT         | NA | 27 | 15 | 12 | 0,13378325 | 0,4111905  |
| spatialObject_Neo+Arc KO  | Neo+Arc KO | NA | 15 | 8  | 7  | 12,8       | 17,2924426 |
| spatialObject_Neo-Arc KO  | Neo-Arc KO | NA | 16 | 8  | 8  | 6,4375     | 7,27524341 |
| spatialObject_WT          | WT         | NA | 28 | 16 | 12 | 10,6785714 | 10,317384  |
| spatialObject_Neo+Arc KO  | Neo+Arc KO | NA | 15 | 8  | 7  | 18,7333333 | 25,3059752 |
| spatialObject_Neo-Arc KO  | Neo-Arc KO | NA | 16 | 8  | 8  | 9,2875     | 17,4650842 |

|                             |             |    |    |    |    |             |            |
|-----------------------------|-------------|----|----|----|----|-------------|------------|
| spatialObject_WT            | WT          | NA | 28 | 16 | 12 | 12,4892857  | 11,8594341 |
| spatialObject_Neo+ Arc KO   | Neo+ Arc KO | NA | 15 | 8  | 7  | 10          | 12         |
| spatialObject_Neo- Arc KO   | Neo- Arc KO | NA | 16 | 8  | 8  | 10,6875     | 18,5534139 |
| spatialObject_WT            | WT          | NA | 28 | 16 | 12 | 11,7857143  | 6,60166726 |
| spatialObject_Neo+ Arc KO   | Neo+ Arc KO | NA | 15 | 8  | 7  | 15,8        | 20,8422648 |
| spatialObject_Neo- Arc KO   | Neo- Arc KO | NA | 16 | 8  | 8  | 12,41875    | 21,1106361 |
| spatialObject_WT            | WT          | NA | 28 | 16 | 12 | 13,4642857  | 9,73322733 |
| spatialObject_Neo+ Arc KO   | Neo+ Arc KO | NA | 15 | 8  | 7  | -0,3117517  | 0,46469935 |
| spatialObject_Neo- Arc KO   | Neo- Arc KO | NA | 14 | 6  | 8  | 0,20661168  | 0,74883882 |
| spatialObject_WT            | WT          | NA | 26 | 14 | 12 | 0,11594323  | 0,44915643 |
| spatialObject_Neo+ Arc KO   | Neo+ Arc KO | NA | 15 | 8  | 7  | 10,6666667  | 23,3656239 |
| spatialObject_Neo- Arc KO   | Neo- Arc KO | NA | 14 | 6  | 8  | 2,64285714  | 3,27242895 |
| spatialObject_WT            | WT          | NA | 26 | 14 | 12 | 9,03846154  | 6,90785506 |
| spatialObject_Neo+ Arc KO   | Neo+ Arc KO | NA | 15 | 8  | 7  | 21,8        | 55,484335  |
| spatialObject_Neo- Arc KO   | Neo- Arc KO | NA | 14 | 6  | 8  | 2,97857143  | 4,71595958 |
| spatialObject_WT            | WT          | NA | 26 | 14 | 12 | 10,0653846  | 9,44821432 |
| spatialObject_Neo+ Arc KO   | Neo+ Arc KO | NA | 15 | 8  | 7  | 4,2         | 4,26279586 |
| spatialObject_Neo- Arc KO   | Neo- Arc KO | NA | 14 | 6  | 8  | 4,07142857  | 4,85900094 |
| spatialObject_WT            | WT          | NA | 26 | 14 | 12 | 10,2692308  | 7,13054103 |
| spatialObject_Neo+ Arc KO   | Neo+ Arc KO | NA | 15 | 8  | 7  | 9,31333333  | 20,2218011 |
| spatialObject_Neo- Arc KO   | Neo- Arc KO | NA | 14 | 6  | 8  | 9,64285714  | 21,0564339 |
| spatialObject_WT            | WT          | NA | 26 | 14 | 12 | 18,3538462  | 23,6641202 |
| stringTest_hin Neo+ Arc KO  | Neo+ Arc KO | NA | 13 | 9  | 4  | 33,8461538  | 32,472671  |
| stringTest_hin WT           | WT          | NA | 20 | 10 | 10 | 21,8        | 28,5539194 |
| stringTest_lati Neo+ Arc KO | Neo+ Arc KO | NA | 13 | 9  | 4  | 61,6923077  | 42,8045648 |
| stringTest_lati WT          | WT          | NA | 20 | 10 | 10 | 27,55       | 33,3631928 |
| tubeTest_win: Neo+ Arc KO   | Neo+ Arc KO | NA | 8  | 4  | 4  | 3           | 1,19522861 |
| tubeTest_win: WT            | WT          | NA | 8  | 4  | 4  | 1           | 0,75592895 |
| tubeTest_win: Neo+ Arc KO   | Neo+ Arc KO | NA | 8  | 4  | 4  | 3,375       | 0,74402381 |
| tubeTest_win: WT            | WT          | NA | 8  | 4  | 4  | 0,625       | 0,91612538 |
| tubeTest_win: Neo+ Arc KO   | Neo+ Arc KO | NA | 8  | 4  | 4  | 2,375       | 1,30247018 |
| tubeTest_win: WT            | WT          | NA | 8  | 4  | 4  | 1,5         | 1,19522861 |
| tubeTest_win: Neo+ Arc KO   | Neo+ Arc KO | NA | 8  | 4  | 4  | 1,125       | 0,83452296 |
| tubeTest_win: WT            | WT          | NA | 8  | 4  | 4  | 1           | 1,06904497 |
| tubeTest_win: Neo+ Arc KO   | Neo+ Arc KO | NA | 8  | 4  | 4  | 0,75        | 0,70710678 |
| tubeTest_win: WT            | WT          | NA | 8  | 4  | 4  | 0,875       | 0,83452296 |
| tubeTest_win: Neo+ Arc KO   | Neo+ Arc KO | NA | 8  | 4  | 4  | 0,75        | 0,70710678 |
| tubeTest_win: WT            | WT          | NA | 8  | 4  | 4  | 1           | 1,06904497 |
| ymazeMemor Neo+ Arc KO      | Neo+ Arc KO | NA | 13 | 6  | 7  | 5,30769231  | 2,86893172 |
| ymazeMemor WT               | WT          | NA | 16 | 8  | 8  | 9,3125      | 3,55375388 |
| ymazeMemor Neo+ Arc KO      | Neo+ Arc KO | NA | 13 | 6  | 7  | 76,7153846  | 57,1758376 |
| ymazeMemor WT               | WT          | NA | 16 | 8  | 8  | 73,54375    | 39,4646165 |
| ymaze_altern Neo+ Arc KO    | Neo+ Arc KO | NA | 12 | 6  | 6  | 22,83333333 | 6,88652615 |
| ymaze_altern WT             | WT          | NA | 8  | 4  | 4  | 32,25       | 6,27352715 |
| ymaze_perce Neo+ Arc KO     | Neo+ Arc KO | NA | 12 | 6  | 6  | 35,3829697  | 15,9508978 |
| ymaze_perce WT              | WT          | NA | 8  | 4  | 4  | 33,9745077  | 9,45659493 |
| ymaze_perce Neo+ Arc KO     | Neo+ Arc KO | NA | 12 | 6  | 6  | 3,54689367  | 7,62242292 |
| ymaze_perce WT              | WT          | NA | 8  | 4  | 4  | 1,79147879  | 2,54887561 |
| ymaze_perce Neo+ Arc KO     | Neo+ Arc KO | NA | 12 | 6  | 6  | 61,0701366  | 18,0371451 |
| ymaze_perce WT              | WT          | NA | 8  | 4  | 4  | 64,2340135  | 8,96198741 |

| var_s1         | .y.      | group1      | group2 | n1 | n2 | statistic     | p          | p.adj      | p.adj.signif |
|----------------|----------|-------------|--------|----|----|---------------|------------|------------|--------------|
| duration_croci | value_s1 | Neo+ Arc KO | WT 1   |    | 15 | 14 3,33172388 | 0,0008631  | 0,01294648 | *            |
| duration_nest  | value_s1 | Neo+ Arc KO | WT 1   |    | 15 | 14 3,18581997 | 0,00144344 | 0,02165166 | *            |
| latency_first  | value_s1 | Neo+ Arc KO | WT 1   |    | 15 | 14 -4,3165835 | 1,58E-05   | 0,00023769 | ***          |
| latency_fourth | value_s1 | Neo+ Arc KO | WT 1   |    | 15 | 14 -3,6437841 | 0,00026866 | 0,00376122 | **           |
| latency_full_n | value_s1 | Neo+ Arc KO | WT 1   |    | 15 | 13 -3,5687275 | 0,00035872 | 0,00538079 | **           |
| latency_second | value_s1 | Neo+ Arc KO | WT 1   |    | 15 | 14 -4,4833624 | 7,35E-06   | 0,00011021 | ***          |
| latency_third  | value_s1 | Neo+ Arc KO | WT 1   |    | 15 | 14 -4,3863723 | 1,15E-05   | 0,00017289 | ***          |
| number_crou    | value_s1 | Neo+ Arc KO | WT 1   |    | 15 | 14 3,23821963 | 0,00120278 | 0,01804173 | *            |
| time_crouching | value_s1 | Neo+ Arc KO | WT 1   |    | 15 | 14 3,35472984 | 0,00079443 | 0,01191638 | *            |
| E+Maze_center  | value_s1 | Neo+ Arc KO | WT     |    | 13 | 20 3,80222617 | 0,0001434  | 0,0001434  | ***          |
| E+Maze_close   | value_s1 | Neo+ Arc KO | WT     |    | 13 | 20 3,47057508 | 0,00051935 | 0,00051935 | ***          |
| ms_digging_d   | value_s1 | Neo+ Arc KO | WT     |    | 10 | 31 -4,5352244 | 5,75E-06   | 1,73E-05   | ****         |
| ms_selfGroom   | value_s1 | Neo+ Arc KO | WT     |    | 10 | 31 -3,6855148 | 0,00022824 | 0,00068472 | ***          |
| ms_selfGroom   | value_s1 | Neo- Arc KO | WT     |    | 25 | 31 -3,56004   | 0,0003708  | 0,0011124  | **           |
| ms_selfGroom   | value_s1 | Neo+ Arc KO | WT     |    | 10 | 31 -2,6772379 | 0,00742319 | 0,01484638 | *            |
| nsf_food_inta  | value_s1 | Neo+ Arc KO | WT     |    | 9  | 8 3,51619629  | 0,00043778 | 0,00043778 | ***          |
| olfactoryAvoi  | value_s1 | Neo+ Arc KO | WT     |    | 13 | 20 -3,0421709 | 0,00234878 | 0,00234878 | **           |
| p1_chamberC    | value_s1 | Neo+ Arc KO | WT     |    | 12 | 26 3,32102197 | 0,00089688 | 0,00179377 | **           |
| p1_immobilit   | value_s1 | Neo- Arc KO | WT     |    | 14 | 26 -2,9512693 | 0,00316471 | 0,00632942 | **           |
| p1_immobilit   | value_s1 | Neo+ Arc KO | WT     |    | 12 | 26 2,50071647 | 0,01239424 | 0,01239424 | *            |
| p2_chM_num     | value_s1 | Neo- Arc KO | WT     |    | 14 | 26 4,34913141 | 1,37E-05   | 4,10E-05   | ****         |
| p2_chT_num     | value_s1 | Neo- Arc KO | WT     |    | 14 | 26 3,96852771 | 7,23E-05   | 0,00021695 | ***          |
| p2_chamberC    | value_s1 | Neo- Arc KO | WT     |    | 14 | 26 3,61250867 | 0,00030325 | 0,00090975 | ***          |
| p3_chM_num     | value_s1 | Neo+ Arc KO | WT     |    | 12 | 8 3,4191843   | 0,00062809 | 0,00062809 | ***          |
| socialOlfactio | value_s1 | Neo+ Arc KO | WT     |    | 8  | 8 2,94058818  | 0,0032759  | 0,0032759  | **           |
| socialOlfactio | value_s1 | Neo+ Arc KO | WT     |    | 8  | 8 3,04041443  | 0,00236253 | 0,00236253 | **           |
| spatialObject_ | value_s1 | Neo- Arc KO | WT     |    | 14 | 26 3,42346782 | 0,00061828 | 0,00185483 | **           |
| spatialObject_ | value_s1 | Neo- Arc KO | WT     |    | 14 | 26 2,88168591 | 0,00395554 | 0,01059403 | *            |
| spatialObject_ | value_s1 | Neo+ Arc KO | WT     |    | 15 | 26 2,9172485  | 0,00353134 | 0,01059403 | *            |
| tubeTest_win   | value_s1 | Neo+ Arc KO | WT     |    | 8  | 8 -3,3506172  | 0,00080632 | 0,00080632 | ***          |
| ymazeMemor     | value_s1 | Neo+ Arc KO | WT     |    | 13 | 16 3,12939721 | 0,00175165 | 0,00175165 | **           |

**Table S2. Mean and statistics of social interaction in the Live Mouse Tracker**

| event      | expe                 | day | genotype | line     | genotype_mother | treatment | KO_postweaning | N  | n_females | n_males | mean       | sd         |
|------------|----------------------|-----|----------|----------|-----------------|-----------|----------------|----|-----------|---------|------------|------------|
| Cuddling   | OT treatment         | 1   | KO       | Neo+ Arc | KO              | OT20      | KO control     | 16 | 10        | 6       | 39,75      | 43,5943472 |
| Cuddling   | OT treatment         | 1   | KO       | Neo+ Arc | KO              | SAL       | KO control     | 12 | 8         | 4       | 24,3694444 | 7,58989837 |
| Cuddling   | OT treatment         | 1   | WT       | Neo+ Arc | WT              | OT20      | WT control     | 19 | 8         | 11      | 39,6807018 | 12,7585716 |
| Cuddling   | OT treatment         | 1   | WT       | Neo+ Arc | WT              | SAL       | WT control     | 15 | 7         | 8       | 40,1866667 | 11,331476  |
| Cuddling   | OT treatment         | 7   | KO       | Neo+ Arc | KO              | OT20      | KO control     | 16 | 10        | 6       | 27,4791667 | 15,7791699 |
| Cuddling   | OT treatment         | 7   | KO       | Neo+ Arc | KO              | SAL       | KO control     | 12 | 8         | 4       | 26,2944444 | 10,5308861 |
| Cuddling   | OT treatment         | 7   | WT       | Neo+ Arc | WT              | OT20      | WT control     | 19 | 8         | 11      | 37,4315789 | 22,0398922 |
| Cuddling   | OT treatment         | 7   | WT       | Neo+ Arc | WT              | SAL       | WT control     | 15 | 7         | 8       | 35,6177778 | 19,5481086 |
| Cuddling   | OT treatment         | 14  | KO       | Neo+ Arc | KO              | OT20      | KO control     | 16 | 10        | 6       | 22,5875    | 4,74061842 |
| Cuddling   | OT treatment         | 14  | KO       | Neo+ Arc | KO              | SAL       | KO control     | 12 | 8         | 4       | 27         | 9,00188532 |
| Cuddling   | OT treatment         | 14  | WT       | Neo+ Arc | WT              | OT20      | WT control     | 19 | 8         | 11      | 54,4280702 | 37,1399211 |
| Cuddling   | OT treatment         | 14  | WT       | Neo+ Arc | WT              | SAL       | WT control     | 15 | 7         | 8       | 37,6311111 | 19,9937152 |
| Cuddling   | OT treatment         | 21  | KO       | Neo+ Arc | KO              | OT20      | KO control     | 16 | 10        | 6       | 31,9395833 | 17,1466192 |
| Cuddling   | OT treatment         | 21  | KO       | Neo+ Arc | KO              | SAL       | KO control     | 12 | 8         | 4       | 65,8333333 | 38,3277624 |
| Cuddling   | OT treatment         | 21  | WT       | Neo+ Arc | WT              | OT20      | WT control     | 19 | 8         | 11      | 52,1684211 | 49,5228809 |
| Cuddling   | OT treatment         | 21  | WT       | Neo+ Arc | WT              | SAL       | WT control     | 15 | 7         | 8       | 43,9511111 | 19,0957066 |
| Cuddling   | OT treatment         | 28  | KO       | Neo+ Arc | KO              | OT20      | KO control     | 16 | 10        | 6       | 36,31875   | 15,014837  |
| Cuddling   | OT treatment         | 28  | KO       | Neo+ Arc | KO              | SAL       | KO control     | 12 | 8         | 4       | 45,6194444 | 21,8807071 |
| Cuddling   | OT treatment         | 28  | WT       | Neo+ Arc | WT              | OT20      | WT control     | 19 | 8         | 11      | 46,6894737 | 38,5154868 |
| Cuddling   | OT treatment         | 28  | WT       | Neo+ Arc | WT              | SAL       | WT control     | 15 | 7         | 8       | 24,7377778 | 12,5670953 |
| Cuddling   | genotype differences | 1   | KO       | Neo- Arc | NA              | NA        | KO control     | 31 | 15        | 16      | 23,8623656 | 20,0112963 |
| Cuddling   | genotype differences | 1   | WT       | Neo- Arc | NA              | NA        | WT control     | 30 | 15        | 15      | 20,1888889 | 8,97866067 |
| Cuddling   | genotype differences | 2   | KO       | Neo- Arc | NA              | NA        | KO control     | 31 | 15        | 16      | 45,8430108 | 14,9740224 |
| Cuddling   | genotype differences | 2   | WT       | Neo- Arc | NA              | NA        | WT control     | 30 | 15        | 15      | 48,8133333 | 16,3810296 |
| Cuddling   | genotype differences | 3   | KO       | Neo- Arc | NA              | NA        | KO control     | 31 | 15        | 16      | 83,2301075 | 39,1805029 |
| Cuddling   | genotype differences | 3   | WT       | Neo- Arc | NA              | NA        | WT control     | 30 | 15        | 15      | 50,6555556 | 17,1749201 |
| Cuddling   | social enrichment    | 1   | +/-      | Neo+ Arc | NA              | NA        | enriched       | 18 | 11        | 7       | 11,9462963 | 4,69130943 |
| Cuddling   | social enrichment    | 1   | +/-      | Neo+ Arc | NA              | NA        | social         | 17 | 11        | 6       | 8          | 2,51749435 |
| Cuddling   | social enrichment    | 1   | KO       | Neo+ Arc | NA              | NA        | enriched       | 13 | 6         | 7       | 12,1102564 | 5,95752535 |
| Cuddling   | social enrichment    | 1   | KO       | Neo+ Arc | NA              | NA        | non-social     | 32 | 22        | 10      | 5,35416667 | 1,90156981 |
| Cuddling   | social enrichment    | 1   | WT       | Neo+ Arc | NA              | NA        | enriched       | 7  | 5         | 2       | 10,6       | 5,65240034 |
| Cuddling   | social enrichment    | 1   | WT       | Neo+ Arc | NA              | NA        | social         | 48 | 31        | 17      | 7,1777778  | 3,78683381 |
| Cuddling   | social enrichment    | 2   | +/-      | Neo+ Arc | NA              | NA        | enriched       | 16 | 9         | 7       | 30,2104167 | 9,46592109 |
| Cuddling   | social enrichment    | 2   | +/-      | Neo+ Arc | NA              | NA        | social         | 8  | 3         | 5       | 33,8791667 | 10,4523247 |
| Cuddling   | social enrichment    | 2   | KO       | Neo+ Arc | NA              | NA        | enriched       | 12 | 5         | 7       | 29,0972222 | 10,2583738 |
| Cuddling   | social enrichment    | 2   | KO       | Neo+ Arc | NA              | NA        | non-social     | 24 | 12        | 12      | 30,9555556 | 12,9829679 |
| Cuddling   | social enrichment    | 2   | WT       | Neo+ Arc | NA              | NA        | enriched       | 7  | 5         | 2       | 34,9952381 | 10,306029  |
| Cuddling   | social enrichment    | 2   | WT       | Neo+ Arc | NA              | NA        | social         | 43 | 26        | 17      | 31,820155  | 13,4404903 |
| Cuddling   | social enrichment    | 3   | +/-      | Neo+ Arc | NA              | NA        | enriched       | 17 | 10        | 7       | 30,8803922 | 24,0226486 |
| Cuddling   | social enrichment    | 3   | +/-      | Neo+ Arc | NA              | NA        | social         | 10 | 5         | 5       | 28,59      | 16,2945196 |
| Cuddling   | social enrichment    | 3   | KO       | Neo+ Arc | NA              | NA        | enriched       | 12 | 5         | 7       | 24,9333333 | 7,1055676  |
| Cuddling   | social enrichment    | 3   | KO       | Neo+ Arc | NA              | NA        | non-social     | 24 | 12        | 12      | 27,9319444 | 9,03356853 |
| Cuddling   | social enrichment    | 3   | WT       | Neo+ Arc | NA              | NA        | enriched       | 7  | 5         | 2       | 28,7809524 | 11,1194334 |
| Cuddling   | social enrichment    | 3   | WT       | Neo+ Arc | NA              | NA        | social         | 39 | 24        | 15      | 30,1213675 | 12,7332587 |
| FollowZone | OT treatment         | 1   | KO       | Neo+ Arc | KO              | OT20      | KO control     | 11 | 7         | 4       | 1,26363636 | 1,05392964 |
| FollowZone | OT treatment         | 1   | KO       | Neo+ Arc | KO              | SAL       | KO control     | 8  | 7         | 1       | 1,375      | 1,26838855 |
| FollowZone | OT treatment         | 1   | WT       | Neo+ Arc | WT              | OT20      | WT control     | 19 | 8         | 11      | 2,97894737 | 2,36995626 |
| FollowZone | OT treatment         | 1   | WT       | Neo+ Arc | WT              | SAL       | WT control     | 15 | 7         | 8       | 3,74222222 | 2,86690106 |
| FollowZone | OT treatment         | 7   | KO       | Neo+ Arc | KO              | OT20      | KO control     | 12 | 8         | 4       | 0,96388889 | 0,49019854 |
| FollowZone | OT treatment         | 7   | KO       | Neo+ Arc | KO              | SAL       | KO control     | 11 | 8         | 3       | 1,4        | 0,8566083  |
| FollowZone | OT treatment         | 7   | WT       | Neo+ Arc | WT              | OT20      | WT control     | 15 | 7         | 8       | 1,12       | 1,06434271 |
| FollowZone | OT treatment         | 7   | WT       | Neo+ Arc | WT              | SAL       | WT control     | 13 | 7         | 6       | 1,64615385 | 1,17980997 |
| FollowZone | OT treatment         | 14  | KO       | Neo+ Arc | KO              | OT20      | KO control     | 8  | 5         | 3       | 1,375      | 0,88402938 |
| FollowZone | OT treatment         | 14  | KO       | Neo+ Arc | KO              | SAL       | KO control     | 9  | 6         | 3       | 1,64074074 | 1,46095267 |
| FollowZone | OT treatment         | 14  | WT       | Neo+ Arc | WT              | OT20      | WT control     | 15 | 8         | 7       | 1,67111111 | 1,96569252 |
| FollowZone | OT treatment         | 14  | WT       | Neo+ Arc | WT              | SAL       | WT control     | 11 | 5         | 6       | 1,94848485 | 2,09031436 |
| FollowZone | OT treatment         | 21  | KO       | Neo+ Arc | KO              | OT20      | KO control     | 12 | 8         | 4       | 1,40555556 | 1,51369728 |
| FollowZone | OT treatment         | 21  | KO       | Neo+ Arc | KO              | SAL       | KO control     | 10 | 7         | 3       | 1,54333333 | 1,01032326 |
| FollowZone | OT treatment         | 21  | WT       | Neo+ Arc | WT              | OT20      | WT control     | 15 | 7         | 8       | 2,54666667 | 3,05761604 |
| FollowZone | OT treatment         | 21  | WT       | Neo+ Arc | WT              | SAL       | WT control     | 12 | 6         | 6       | 1,825      | 1,48031699 |
| FollowZone | OT treatment         | 28  | KO       | Neo+ Arc | KO              | OT20      | KO control     | 14 | 9         | 5       | 1,48571429 | 0,98403619 |
| FollowZone | OT treatment         | 28  | KO       | Neo+ Arc | KO              | SAL       | KO control     | 10 | 7         | 3       | 2,35666667 | 1,70388445 |
| FollowZone | OT treatment         | 28  | WT       | Neo+ Arc | WT              | OT20      | WT control     | 18 | 8         | 10      | 2,44259259 | 1,87918789 |
| FollowZone | OT treatment         | 28  | WT       | Neo+ Arc | WT              | SAL       | WT control     | 14 | 7         | 7       | 2,66428571 | 3,22793534 |
| FollowZone | genotype differences | 1   | +/-      | Neo+ Arc | +/+             | NA        | NA             | 32 | 16        | 16      | 10,6104167 | 4,29345119 |
| FollowZone | genotype differences | 1   | +/-      | Neo+ Arc | -/-             | NA        | NA             | 28 | 16        | 12      | 9,96428571 | 3,57894999 |
| FollowZone | genotype differences | 1   | KO       | Neo+ Arc | NA              | NA        | KO control     | 13 | 6         | 7       | 3,92820513 | 2,45235511 |
| FollowZone | genotype differences | 1   | KO       | Neo- Arc | NA              | NA        | KO control     | 13 | 5         | 8       | 0,50769231 | 0,27893775 |
| FollowZone | genotype differences | 1   | WT       | Neo+ Arc | NA              | NA        | WT control     | 19 | 8         | 11      | 8,01578947 | 4,43737449 |
| FollowZone | genotype differences | 1   | WT       | Neo- Arc | NA              | NA        | WT control     | 21 | 12        | 9       | 1,03968254 | 0,77313353 |
| FollowZone | genotype differences | 2   | +/-      | Neo+ Arc | +/+             | NA        | NA             | 32 | 16        | 16      | 16,2770833 | 10,1815859 |
| FollowZone | genotype differences | 2   | +/-      | Neo+ Arc | -/-             | NA        | NA             | 27 | 15        | 12      | 20,308642  | 7,49732484 |
| FollowZone | genotype differences | 2   | KO       | Neo+ Arc | NA              | NA        | KO control     | 12 | 6         | 6       | 8,99166667 | 6,41694608 |
| FollowZone | genotype differences | 2   | KO       | Neo- Arc | NA              | NA        | KO control     | 20 | 12        | 8       | 1,145      | 0,77695424 |
| FollowZone | genotype differences | 2   | WT       | Neo+ Arc | NA              | NA        | WT control     | 18 | 8         | 10      | 14,612963  | 8,86168324 |
| FollowZone | genotype differences | 2   | WT       | Neo- Arc | NA              | NA        | WT control     | 24 | 11        | 13      | 1,84027778 | 1,25393985 |
| FollowZone | genotype differences | 3   | KO       | Neo- Arc | NA              | NA        | KO control     | 20 | 7         | 13      | 1,06166667 | 1,09940308 |
| FollowZone | genotype differences | 3   | WT       | Neo- Arc | NA              | NA        | WT control     | 24 | 13        | 11      | 1,89861111 | 1,70397317 |
| FollowZone | social enrichment    | 1   | +/-      | Neo+ Arc | NA              | NA        | enriched       | 13 | 8         | 5       | 1,3025641  | 0,89695592 |
| FollowZone | social enrichment    | 1   | +/-      | Neo+ Arc | NA              | NA        | social         | 9  | 8         | 1       | 2,02592593 | 1,19335868 |
| FollowZone | social enrichment    | 1   | KO       | Neo+ Arc | NA              | NA        | enriched       | 8  | 3         | 5       | 0,87916667 | 0,68566675 |
| FollowZone | social enrichment    | 1   | KO       | Neo+ Arc | NA              | NA        | non-social     | 10 | 5         | 5       | 0,57333333 | 0,26703678 |
| FollowZone | social enrichment    | 1   | WT       | Neo+ Arc | NA              | NA        | enriched       | 4  | 3         | 1       | 0,55       | 0,26736021 |
| FollowZone | social enrichment    | 1   | WT       | Neo+ Arc | NA              | NA        | social         | 37 | 25        | 12      | 0,81261261 | 0,5400818  |
| FollowZone | social enrichment    | 2   | +/-      | Neo+ Arc | NA              | NA        | enriched       | 14 | 8         | 6       | 2,70714286 | 2,0948524  |
| FollowZone | social enrichment    | 2   | +/-      | Neo+ Arc | NA              | NA        | social         | 8  | 3         | 5       | 1,82083333 | 1,36113136 |
| FollowZone | social enrichment    | 2   | KO       | Neo+ Arc | NA              | NA        | enriched       | 11 | 5         | 6       | 1,08484848 | 0,8949691  |
| FollowZone | social enrichment    | 2   | KO       | Neo+ Arc | NA              | NA        | non-social     | 22 | 11        | 11      | 2,02727273 | 1,40763738 |
| FollowZone | social enrichment    | 2   | WT       | Neo+ Arc | NA              | NA        | enriched       | 6  | 4         | 2       | 1,59444444 | 0,71784141 |

|                 |                      |    |     |          |     |      |            |    |    |    |            |            |
|-----------------|----------------------|----|-----|----------|-----|------|------------|----|----|----|------------|------------|
| FollowZone      | social enrichment    | 2  | WT  | Neo+ Arc | NA  | NA   | social     | 41 | 26 | 15 | 2,21138211 | 2,02922549 |
| FollowZone      | social enrichment    | 3  | +/- | Neo+ Arc | NA  | NA   | enriched   | 17 | 10 | 7  | 2,18235294 | 1,35739321 |
| FollowZone      | social enrichment    | 3  | +/- | Neo+ Arc | NA  | NA   | social     | 8  | 5  | 3  | 2,54583333 | 2,84431695 |
| FollowZone      | social enrichment    | 3  | KO  | Neo+ Arc | NA  | NA   | enriched   | 12 | 5  | 7  | 1,83333333 | 0,83714281 |
| FollowZone      | social enrichment    | 3  | KO  | Neo+ Arc | NA  | NA   | non-social | 17 | 10 | 7  | 1,10392157 | 0,84966352 |
| FollowZone      | social enrichment    | 3  | WT  | Neo+ Arc | NA  | NA   | enriched   | 7  | 5  | 2  | 2,00952381 | 2,54999741 |
| FollowZone      | social enrichment    | 3  | WT  | Neo+ Arc | NA  | NA   | social     | 33 | 21 | 12 | 2,58888889 | 1,98556714 |
| Make contact    | OT treatment         | 1  | KO  | Neo+ Arc | KO  | OT20 | KO control | 16 | 10 | 6  | 25,7958333 | 11,6763825 |
| Make contact    | OT treatment         | 1  | KO  | Neo+ Arc | KO  | SAL  | KO control | 12 | 8  | 4  | 30,2527778 | 12,0532443 |
| Make contact    | OT treatment         | 1  | WT  | Neo+ Arc | WT  | OT20 | WT control | 19 | 8  | 11 | 31,3929825 | 15,6790085 |
| Make contact    | OT treatment         | 1  | WT  | Neo+ Arc | WT  | SAL  | WT control | 15 | 7  | 8  | 35,5666667 | 16,5797639 |
| Make contact    | OT treatment         | 7  | KO  | Neo+ Arc | KO  | OT20 | KO control | 16 | 10 | 6  | 31,7958333 | 14,2700301 |
| Make contact    | OT treatment         | 7  | KO  | Neo+ Arc | KO  | SAL  | KO control | 12 | 8  | 4  | 36,3861111 | 9,50813005 |
| Make contact    | OT treatment         | 7  | WT  | Neo+ Arc | WT  | OT20 | WT control | 19 | 8  | 11 | 29,2929825 | 13,5387855 |
| Make contact    | OT treatment         | 7  | WT  | Neo+ Arc | WT  | SAL  | WT control | 15 | 7  | 8  | 32,0333333 | 18,277152  |
| Make contact    | OT treatment         | 14 | KO  | Neo+ Arc | KO  | OT20 | KO control | 16 | 10 | 6  | 31,7208333 | 12,6628876 |
| Make contact    | OT treatment         | 14 | KO  | Neo+ Arc | KO  | SAL  | KO control | 12 | 8  | 4  | 33,7388889 | 8,81244338 |
| Make contact    | OT treatment         | 14 | WT  | Neo+ Arc | WT  | OT20 | WT control | 19 | 8  | 11 | 29,7087719 | 17,2282349 |
| Make contact    | OT treatment         | 14 | WT  | Neo+ Arc | WT  | SAL  | WT control | 15 | 7  | 8  | 28,4466667 | 14,2267678 |
| Make contact    | OT treatment         | 21 | KO  | Neo+ Arc | KO  | OT20 | KO control | 16 | 10 | 6  | 29,8       | 11,7939658 |
| Make contact    | OT treatment         | 21 | KO  | Neo+ Arc | KO  | SAL  | KO control | 12 | 8  | 4  | 37,2222222 | 13,6469505 |
| Make contact    | OT treatment         | 21 | WT  | Neo+ Arc | WT  | OT20 | WT control | 19 | 8  | 11 | 36,5368421 | 22,1347052 |
| Make contact    | OT treatment         | 21 | WT  | Neo+ Arc | WT  | SAL  | WT control | 15 | 7  | 8  | 36,7555556 | 20,5900449 |
| Make contact    | OT treatment         | 28 | KO  | Neo+ Arc | KO  | OT20 | KO control | 16 | 10 | 6  | 42,2416667 | 31,7500458 |
| Make contact    | OT treatment         | 28 | KO  | Neo+ Arc | KO  | SAL  | KO control | 12 | 8  | 4  | 46,6638889 | 20,4603359 |
| Make contact    | OT treatment         | 28 | WT  | Neo+ Arc | WT  | OT20 | WT control | 19 | 8  | 11 | 38,5157895 | 25,7726225 |
| Make contact    | OT treatment         | 28 | WT  | Neo+ Arc | WT  | SAL  | WT control | 15 | 7  | 8  | 29,7       | 25,0293447 |
| Make contact    | genotype differences | 1  | KO  | Neo- Arc | NA  | NA   | KO control | 31 | 15 | 16 | 20,5150538 | 10,0456766 |
| Make contact    | genotype differences | 1  | WT  | Neo- Arc | NA  | NA   | WT control | 30 | 15 | 15 | 22,7344444 | 15,149552  |
| Make contact    | genotype differences | 2  | KO  | Neo- Arc | NA  | NA   | KO control | 31 | 15 | 16 | 26,5817204 | 11,8094966 |
| Make contact    | genotype differences | 2  | WT  | Neo- Arc | NA  | NA   | WT control | 30 | 15 | 15 | 36,3488889 | 12,8847492 |
| Make contact    | genotype differences | 3  | KO  | Neo- Arc | NA  | NA   | KO control | 31 | 15 | 16 | 30,2516129 | 13,7200336 |
| Make contact    | genotype differences | 3  | WT  | Neo- Arc | NA  | NA   | WT control | 30 | 15 | 15 | 35,8722222 | 15,0663566 |
| Make contact    | social enrichment    | 1  | +/- | Neo+ Arc | NA  | NA   | enriched   | 18 | 11 | 7  | 18,3592593 | 8,49054496 |
| Make contact    | social enrichment    | 1  | +/- | Neo+ Arc | NA  | NA   | social     | 17 | 11 | 6  | 11,2254902 | 7,8255061  |
| Make contact    | social enrichment    | 1  | KO  | Neo+ Arc | NA  | NA   | enriched   | 13 | 6  | 7  | 10,6512821 | 7,25968849 |
| Make contact    | social enrichment    | 1  | KO  | Neo+ Arc | NA  | NA   | non-social | 34 | 22 | 12 | 7,19019608 | 4,61120382 |
| Make contact    | social enrichment    | 1  | WT  | Neo+ Arc | NA  | NA   | enriched   | 7  | 5  | 2  | 11,4857143 | 3,32954547 |
| Make contact    | social enrichment    | 1  | WT  | Neo+ Arc | NA  | NA   | social     | 48 | 31 | 17 | 12,7763889 | 7,08898176 |
| Make contact    | social enrichment    | 2  | +/- | Neo+ Arc | NA  | NA   | enriched   | 16 | 9  | 7  | 20,3666667 | 8,47702778 |
| Make contact    | social enrichment    | 2  | +/- | Neo+ Arc | NA  | NA   | social     | 8  | 3  | 5  | 18,0416667 | 8,77038216 |
| Make contact    | social enrichment    | 2  | KO  | Neo+ Arc | NA  | NA   | enriched   | 12 | 5  | 7  | 17,7777778 | 6,68576557 |
| Make contact    | social enrichment    | 2  | KO  | Neo+ Arc | NA  | NA   | non-social | 24 | 12 | 12 | 16,4152778 | 6,16913761 |
| Make contact    | social enrichment    | 2  | WT  | Neo+ Arc | NA  | NA   | enriched   | 7  | 5  | 2  | 18,4761905 | 8,20170972 |
| Make contact    | social enrichment    | 2  | WT  | Neo+ Arc | NA  | NA   | social     | 43 | 26 | 17 | 21,075969  | 8,05142968 |
| Make contact    | social enrichment    | 3  | +/- | Neo+ Arc | NA  | NA   | enriched   | 17 | 10 | 7  | 21,6431373 | 8,10009229 |
| Make contact    | social enrichment    | 3  | +/- | Neo+ Arc | NA  | NA   | social     | 10 | 5  | 5  | 18,7233333 | 8,14437699 |
| Make contact    | social enrichment    | 3  | KO  | Neo+ Arc | NA  | NA   | enriched   | 12 | 5  | 7  | 17,4472222 | 5,83572173 |
| Make contact    | social enrichment    | 3  | KO  | Neo+ Arc | NA  | NA   | non-social | 24 | 12 | 12 | 19,1666667 | 8,35528702 |
| Make contact    | social enrichment    | 3  | WT  | Neo+ Arc | NA  | NA   | enriched   | 7  | 5  | 2  | 19,6857143 | 4,8196687  |
| Make contact    | social enrichment    | 3  | WT  | Neo+ Arc | NA  | NA   | social     | 39 | 24 | 15 | 21,0461538 | 10,370326  |
| Move in contact | OT treatment         | 1  | KO  | Neo+ Arc | KO  | OT20 | KO control | 16 | 10 | 6  | 50,0375    | 42,4955481 |
| Move in contact | OT treatment         | 1  | KO  | Neo+ Arc | KO  | SAL  | KO control | 12 | 8  | 4  | 39,3305556 | 9,33452869 |
| Move in contact | OT treatment         | 1  | WT  | Neo+ Arc | WT  | OT20 | WT control | 19 | 8  | 11 | 77,0982456 | 35,0427155 |
| Move in contact | OT treatment         | 1  | WT  | Neo+ Arc | WT  | SAL  | WT control | 15 | 7  | 8  | 87,0466667 | 33,9724534 |
| Move in contact | OT treatment         | 7  | KO  | Neo+ Arc | KO  | OT20 | KO control | 16 | 10 | 6  | 48,13125   | 21,5354951 |
| Move in contact | OT treatment         | 7  | KO  | Neo+ Arc | KO  | SAL  | KO control | 12 | 8  | 4  | 49         | 9,77110769 |
| Move in contact | OT treatment         | 7  | WT  | Neo+ Arc | WT  | OT20 | WT control | 19 | 8  | 11 | 44,9210526 | 26,1966241 |
| Move in contact | OT treatment         | 7  | WT  | Neo+ Arc | WT  | SAL  | WT control | 15 | 7  | 8  | 50,9644444 | 24,4937908 |
| Move in contact | OT treatment         | 14 | KO  | Neo+ Arc | KO  | OT20 | KO control | 16 | 10 | 6  | 47,4041667 | 15,8085297 |
| Move in contact | OT treatment         | 14 | KO  | Neo+ Arc | KO  | SAL  | KO control | 12 | 8  | 4  | 60,1111111 | 20,3677867 |
| Move in contact | OT treatment         | 14 | WT  | Neo+ Arc | WT  | OT20 | WT control | 19 | 8  | 11 | 52,8052632 | 34,371996  |
| Move in contact | OT treatment         | 14 | WT  | Neo+ Arc | WT  | SAL  | WT control | 15 | 7  | 8  | 50,8466667 | 29,8483995 |
| Move in contact | OT treatment         | 21 | KO  | Neo+ Arc | KO  | OT20 | KO control | 16 | 10 | 6  | 59,425     | 30,3735009 |
| Move in contact | OT treatment         | 21 | KO  | Neo+ Arc | KO  | SAL  | KO control | 12 | 8  | 4  | 90,5555556 | 40,5242846 |
| Move in contact | OT treatment         | 21 | WT  | Neo+ Arc | WT  | OT20 | WT control | 15 | 8  | 7  | 58,76      | 36,2997752 |
| Move in contact | OT treatment         | 21 | WT  | Neo+ Arc | WT  | SAL  | WT control | 15 | 7  | 8  | 51,5333333 | 29,6976296 |
| Move in contact | OT treatment         | 28 | KO  | Neo+ Arc | KO  | OT20 | KO control | 16 | 10 | 6  | 73,175     | 23,6063064 |
| Move in contact | OT treatment         | 28 | KO  | Neo+ Arc | KO  | SAL  | KO control | 12 | 8  | 4  | 76,3888889 | 27,8523935 |
| Move in contact | OT treatment         | 28 | WT  | Neo+ Arc | WT  | OT20 | WT control | 18 | 7  | 11 | 62,9962963 | 43,4998233 |
| Move in contact | OT treatment         | 28 | WT  | Neo+ Arc | WT  | SAL  | WT control | 14 | 7  | 7  | 48,1928571 | 24,3080803 |
| Move in contact | genotype differences | 1  | +/- | Neo+ Arc | +/+ | NA   | NA         | 32 | 16 | 16 | 37,9385417 | 10,198412  |
| Move in contact | genotype differences | 1  | +/- | Neo+ Arc | -/- | NA   | NA         | 28 | 16 | 12 | 36,8166667 | 8,38011314 |
| Move in contact | genotype differences | 1  | KO  | Neo+ Arc | NA  | NA   | KO control | 13 | 6  | 7  | 17,3615385 | 3,68525204 |
| Move in contact | genotype differences | 1  | KO  | Neo- Arc | NA  | NA   | KO control | 31 | 15 | 16 | 28,7215054 | 12,2796898 |
| Move in contact | genotype differences | 1  | WT  | Neo+ Arc | NA  | NA   | WT control | 19 | 8  | 11 | 29,2175439 | 14,0906298 |
| Move in contact | genotype differences | 1  | WT  | Neo- Arc | NA  | NA   | WT control | 30 | 15 | 15 | 29,1955556 | 12,193682  |
| Move in contact | genotype differences | 2  | +/- | Neo+ Arc | +/+ | NA   | NA         | 32 | 16 | 16 | 56,8875    | 13,5864252 |
| Move in contact | genotype differences | 2  | +/- | Neo+ Arc | -/- | NA   | NA         | 27 | 15 | 12 | 67,3234568 | 14,8404069 |
| Move in contact | genotype differences | 2  | KO  | Neo+ Arc | NA  | NA   | KO control | 12 | 6  | 6  | 34,3111111 | 8,70655545 |
| Move in contact | genotype differences | 2  | KO  | Neo- Arc | NA  | NA   | KO control | 31 | 15 | 16 | 54,455914  | 19,2329489 |
| Move in contact | genotype differences | 2  | WT  | Neo+ Arc | NA  | NA   | WT control | 18 | 8  | 10 | 48,0314815 | 16,8484381 |
| Move in contact | genotype differences | 2  | WT  | Neo- Arc | NA  | NA   | WT control | 30 | 15 | 15 | 62,9966667 | 19,1139101 |
| Move in contact | genotype differences | 3  | KO  | Neo- Arc | NA  | NA   | KO control | 31 | 15 | 16 | 64,8172043 | 25,280616  |
| Move in contact | genotype differences | 3  | WT  | Neo- Arc | NA  | NA   | WT control | 30 | 15 | 15 | 75,7966667 | 31,0106153 |
| Move in contact | social enrichment    | 1  | +/- | Neo+ Arc | NA  | NA   | enriched   | 18 | 11 | 7  | 23,5518519 | 5,82521252 |
| Move in contact | social enrichment    | 1  | +/- | Neo+ Arc | NA  | NA   | social     | 17 | 11 | 6  | 17,9568627 | 6,47965582 |
| Move in contact | social enrichment    | 1  | KO  | Neo+ Arc | NA  | NA   | enriched   | 13 | 6  | 7  | 18,9282051 | 6,12973696 |
| Move in contact | social enrichment    | 1  | KO  | Neo+ Arc | NA  | NA   | non-social | 34 | 22 | 12 | 10,2862745 | 4,93405071 |
| Move in contact | social enrichment    | 1  | WT  | Neo+ Arc | NA  | NA   | enriched   | 7  | 5  | 2  | 18,1238095 | 4,07475127 |

|                   |                      |    |     |          |     |      |            |    |    |    |            |            |
|-------------------|----------------------|----|-----|----------|-----|------|------------|----|----|----|------------|------------|
| Move in contact   | social enrichment    | 1  | WT  | Neo+ Arc | NA  | NA   | social     | 48 | 31 | 17 | 16,5666667 | 6,77336949 |
| Move in contact   | social enrichment    | 2  | +/- | Neo+ Arc | NA  | NA   | enriched   | 16 | 9  | 7  | 60,01875   | 19,8206027 |
| Move in contact   | social enrichment    | 2  | +/- | Neo+ Arc | NA  | NA   | social     | 8  | 3  | 5  | 62,1416667 | 22,9235496 |
| Move in contact   | social enrichment    | 2  | KO  | Neo+ Arc | NA  | NA   | enriched   | 12 | 5  | 7  | 44,1833333 | 18,225005  |
| Move in contact   | social enrichment    | 2  | KO  | Neo+ Arc | NA  | NA   | non-social | 24 | 12 | 12 | 50,7708333 | 19,7094776 |
| Move in contact   | social enrichment    | 2  | WT  | Neo+ Arc | NA  | NA   | enriched   | 7  | 5  | 2  | 53,5095238 | 28,547444  |
| Move in contact   | social enrichment    | 2  | WT  | Neo+ Arc | NA  | NA   | social     | 43 | 26 | 17 | 54,455814  | 19,6327158 |
| Move in contact   | social enrichment    | 3  | +/- | Neo+ Arc | NA  | NA   | enriched   | 17 | 10 | 7  | 62,527451  | 27,2662317 |
| Move in contact   | social enrichment    | 3  | +/- | Neo+ Arc | NA  | NA   | social     | 11 | 6  | 5  | 51,4333333 | 10,4199275 |
| Move in contact   | social enrichment    | 3  | KO  | Neo+ Arc | NA  | NA   | enriched   | 12 | 5  | 7  | 36,3666667 | 6,63962698 |
| Move in contact   | social enrichment    | 3  | KO  | Neo+ Arc | NA  | NA   | non-social | 24 | 12 | 12 | 42,0236111 | 13,6700649 |
| Move in contact   | social enrichment    | 3  | WT  | Neo+ Arc | NA  | NA   | enriched   | 7  | 5  | 2  | 49,1047619 | 25,1565132 |
| Move in contact   | social enrichment    | 3  | WT  | Neo+ Arc | NA  | NA   | social     | 39 | 24 | 15 | 57,5401709 | 23,7200105 |
| Movelsolated_time | genotype differences | 1  | +/- | Neo+ Arc | +/+ | NA   | NA         | 32 | 16 | 16 | 244,496875 | 42,5880453 |
| Movelsolated_time | genotype differences | 1  | +/- | Neo+ Arc | -/- | NA   | NA         | 28 | 16 | 12 | 236,652381 | 52,2268008 |
| Movelsolated_time | genotype differences | 1  | KO  | Neo+ Arc | NA  | NA   | KO control | 13 | 6  | 7  | 213,792308 | 34,9786659 |
| Movelsolated_time | genotype differences | 1  | WT  | Neo+ Arc | NA  | NA   | WT control | 19 | 8  | 11 | 255,410526 | 51,0387532 |
| Movelsolated_time | genotype differences | 2  | +/- | Neo+ Arc | +/+ | NA   | NA         | 32 | 16 | 16 | 182,773958 | 44,8407782 |
| Movelsolated_time | genotype differences | 2  | +/- | Neo+ Arc | -/- | NA   | NA         | 27 | 15 | 12 | 194,485185 | 39,8808903 |
| Movelsolated_time | genotype differences | 2  | KO  | Neo+ Arc | NA  | NA   | KO control | 12 | 6  | 6  | 180,991667 | 47,560813  |
| Movelsolated_time | genotype differences | 2  | WT  | Neo+ Arc | NA  | NA   | WT control | 18 | 8  | 10 | 215,781481 | 60,6077523 |
| Nose contact      | OT treatment         | 1  | KO  | Neo+ Arc | KO  | OT20 | KO control | 16 | 10 | 6  | 43,4145833 | 31,5344608 |
| Nose contact      | OT treatment         | 1  | KO  | Neo+ Arc | KO  | SAL  | KO control | 12 | 8  | 4  | 42,6666667 | 16,961543  |
| Nose contact      | OT treatment         | 1  | WT  | Neo+ Arc | WT  | OT20 | WT control | 19 | 8  | 11 | 61,7157895 | 15,736889  |
| Nose contact      | OT treatment         | 1  | WT  | Neo+ Arc | WT  | SAL  | WT control | 15 | 7  | 8  | 72,0911111 | 16,3980906 |
| Nose contact      | OT treatment         | 7  | KO  | Neo+ Arc | KO  | OT20 | KO control | 16 | 10 | 6  | 40,0020833 | 14,704363  |
| Nose contact      | OT treatment         | 7  | KO  | Neo+ Arc | KO  | SAL  | KO control | 12 | 8  | 4  | 42,7083333 | 12,6377751 |
| Nose contact      | OT treatment         | 7  | WT  | Neo+ Arc | WT  | OT20 | WT control | 19 | 8  | 11 | 59,645614  | 21,6133452 |
| Nose contact      | OT treatment         | 7  | WT  | Neo+ Arc | WT  | SAL  | WT control | 15 | 7  | 8  | 60,2444444 | 13,5883217 |
| Nose contact      | OT treatment         | 14 | KO  | Neo+ Arc | KO  | OT20 | KO control | 16 | 10 | 6  | 40,0729167 | 11,2290972 |
| Nose contact      | OT treatment         | 14 | KO  | Neo+ Arc | KO  | SAL  | KO control | 12 | 8  | 4  | 50,9083333 | 24,0062918 |
| Nose contact      | OT treatment         | 14 | WT  | Neo+ Arc | WT  | OT20 | WT control | 19 | 8  | 11 | 67,122807  | 29,6052945 |
| Nose contact      | OT treatment         | 14 | WT  | Neo+ Arc | WT  | SAL  | WT control | 15 | 7  | 8  | 58,9733333 | 16,3511623 |
| Nose contact      | OT treatment         | 21 | KO  | Neo+ Arc | KO  | OT20 | KO control | 16 | 10 | 6  | 48,7958333 | 19,5415943 |
| Nose contact      | OT treatment         | 21 | KO  | Neo+ Arc | KO  | SAL  | KO control | 12 | 8  | 4  | 71,7388889 | 32,9836655 |
| Nose contact      | OT treatment         | 21 | WT  | Neo+ Arc | WT  | OT20 | WT control | 19 | 8  | 11 | 78,8175439 | 26,3564488 |
| Nose contact      | OT treatment         | 21 | WT  | Neo+ Arc | WT  | SAL  | WT control | 15 | 7  | 8  | 68,1066667 | 19,7243231 |
| Nose contact      | OT treatment         | 28 | KO  | Neo+ Arc | KO  | OT20 | KO control | 16 | 10 | 6  | 58,5208333 | 20,4642086 |
| Nose contact      | OT treatment         | 28 | KO  | Neo+ Arc | KO  | SAL  | KO control | 12 | 8  | 4  | 64,2555556 | 25,4743616 |
| Nose contact      | OT treatment         | 28 | WT  | Neo+ Arc | WT  | OT20 | WT control | 19 | 8  | 11 | 71,9754386 | 29,5684785 |
| Nose contact      | OT treatment         | 28 | WT  | Neo+ Arc | WT  | SAL  | WT control | 15 | 7  | 8  | 52,3711111 | 19,564573  |
| Nose contact      | genotype differences | 1  | +/- | Neo+ Arc | +/+ | NA   | NA         | 32 | 16 | 16 | 30,43125   | 8,01673848 |
| Nose contact      | genotype differences | 1  | +/- | Neo+ Arc | -/- | NA   | NA         | 28 | 16 | 12 | 30,2964286 | 8,4462003  |
| Nose contact      | genotype differences | 1  | KO  | Neo+ Arc | NA  | NA   | KO control | 13 | 6  | 7  | 15,0666667 | 6,68259209 |
| Nose contact      | genotype differences | 1  | KO  | Neo- Arc | NA  | NA   | KO control | 31 | 15 | 16 | 31,2903226 | 16,2529546 |
| Nose contact      | genotype differences | 1  | WT  | Neo+ Arc | NA  | NA   | WT control | 19 | 8  | 11 | 21,5596491 | 11,8505018 |
| Nose contact      | genotype differences | 1  | WT  | Neo- Arc | NA  | NA   | WT control | 30 | 15 | 15 | 27,0233333 | 8,92263105 |
| Nose contact      | genotype differences | 2  | +/- | Neo+ Arc | +/+ | NA   | NA         | 32 | 16 | 16 | 63,890625  | 17,8339579 |
| Nose contact      | genotype differences | 2  | +/- | Neo+ Arc | -/- | NA   | NA         | 27 | 15 | 12 | 64,8382716 | 18,0546599 |
| Nose contact      | genotype differences | 2  | KO  | Neo+ Arc | NA  | NA   | KO control | 12 | 6  | 6  | 36,2277778 | 11,4317901 |
| Nose contact      | genotype differences | 2  | KO  | Neo- Arc | NA  | NA   | KO control | 31 | 15 | 16 | 56,8397849 | 10,9005077 |
| Nose contact      | genotype differences | 2  | WT  | Neo+ Arc | NA  | NA   | WT control | 18 | 8  | 10 | 48,5685185 | 16,5476514 |
| Nose contact      | genotype differences | 2  | WT  | Neo- Arc | NA  | NA   | WT control | 30 | 15 | 15 | 68,2811111 | 19,4717374 |
| Nose contact      | genotype differences | 3  | KO  | Neo- Arc | NA  | NA   | KO control | 31 | 15 | 16 | 78,8387097 | 26,2839581 |
| Nose contact      | genotype differences | 3  | WT  | Neo- Arc | NA  | NA   | WT control | 30 | 15 | 15 | 66,67      | 17,3448555 |
| Nose contact      | social enrichment    | 1  | +/- | Neo+ Arc | NA  | NA   | enriched   | 18 | 11 | 7  | 17,3425926 | 6,74319609 |
| Nose contact      | social enrichment    | 1  | +/- | Neo+ Arc | NA  | NA   | social     | 17 | 11 | 6  | 12,327451  | 5,46368358 |
| Nose contact      | social enrichment    | 1  | KO  | Neo+ Arc | NA  | NA   | enriched   | 13 | 6  | 7  | 13,8410256 | 6,2049585  |
| Nose contact      | social enrichment    | 1  | KO  | Neo+ Arc | NA  | NA   | non-social | 34 | 22 | 12 | 7,19509804 | 2,8613897  |
| Nose contact      | social enrichment    | 1  | WT  | Neo+ Arc | NA  | NA   | enriched   | 7  | 5  | 2  | 14,8857143 | 3,95197359 |
| Nose contact      | social enrichment    | 1  | WT  | Neo+ Arc | NA  | NA   | social     | 48 | 31 | 17 | 11,4055556 | 3,73857493 |
| Nose contact      | social enrichment    | 2  | +/- | Neo+ Arc | NA  | NA   | enriched   | 16 | 9  | 7  | 43,3416667 | 13,1721058 |
| Nose contact      | social enrichment    | 2  | +/- | Neo+ Arc | NA  | NA   | social     | 8  | 3  | 5  | 47,4416667 | 18,2950835 |
| Nose contact      | social enrichment    | 2  | KO  | Neo+ Arc | NA  | NA   | enriched   | 12 | 5  | 7  | 37,475     | 9,28735564 |
| Nose contact      | social enrichment    | 2  | KO  | Neo+ Arc | NA  | NA   | non-social | 24 | 12 | 12 | 40,0666667 | 12,7299601 |
| Nose contact      | social enrichment    | 2  | WT  | Neo+ Arc | NA  | NA   | enriched   | 7  | 5  | 2  | 49,2333333 | 13,2188698 |
| Nose contact      | social enrichment    | 2  | WT  | Neo+ Arc | NA  | NA   | social     | 43 | 26 | 17 | 46,8682171 | 16,6001912 |
| Nose contact      | social enrichment    | 3  | +/- | Neo+ Arc | NA  | NA   | enriched   | 17 | 10 | 7  | 41,6784314 | 18,6238607 |
| Nose contact      | social enrichment    | 3  | +/- | Neo+ Arc | NA  | NA   | social     | 11 | 6  | 5  | 42,7272727 | 13,7657451 |
| Nose contact      | social enrichment    | 3  | KO  | Neo+ Arc | NA  | NA   | enriched   | 12 | 5  | 7  | 33,1638889 | 8,34736344 |
| Nose contact      | social enrichment    | 3  | KO  | Neo+ Arc | NA  | NA   | non-social | 24 | 12 | 12 | 34,9861111 | 8,62809654 |
| Nose contact      | social enrichment    | 3  | WT  | Neo+ Arc | NA  | NA   | enriched   | 7  | 5  | 2  | 41,2047619 | 21,7062581 |
| Nose contact      | social enrichment    | 3  | WT  | Neo+ Arc | NA  | NA   | social     | 39 | 24 | 15 | 42,9264957 | 16,1508626 |
| Periphery Zone    | OT treatment         | 1  | KO  | Neo+ Arc | KO  | OT20 | KO control | 16 | 10 | 6  | 506,81875  | 57,0924448 |
| Periphery Zone    | OT treatment         | 1  | KO  | Neo+ Arc | KO  | SAL  | KO control | 12 | 8  | 4  | 486,383333 | 41,5859327 |
| Periphery Zone    | OT treatment         | 1  | WT  | Neo+ Arc | WT  | OT20 | WT control | 19 | 8  | 11 | 506,561404 | 38,5894892 |
| Periphery Zone    | OT treatment         | 1  | WT  | Neo+ Arc | WT  | SAL  | WT control | 15 | 7  | 8  | 515,006667 | 35,1001429 |
| Periphery Zone    | OT treatment         | 7  | KO  | Neo+ Arc | KO  | OT20 | KO control | 16 | 10 | 6  | 503,204167 | 54,3151011 |
| Periphery Zone    | OT treatment         | 7  | KO  | Neo+ Arc | KO  | SAL  | KO control | 12 | 8  | 4  | 478,338889 | 61,854722  |
| Periphery Zone    | OT treatment         | 7  | WT  | Neo+ Arc | WT  | OT20 | WT control | 19 | 8  | 11 | 541,140351 | 25,6869679 |
| Periphery Zone    | OT treatment         | 7  | WT  | Neo+ Arc | WT  | SAL  | WT control | 15 | 7  | 8  | 514,566667 | 52,9506794 |
| Periphery Zone    | OT treatment         | 14 | KO  | Neo+ Arc | KO  | OT20 | KO control | 16 | 10 | 6  | 470,64375  | 53,5972107 |
| Periphery Zone    | OT treatment         | 14 | KO  | Neo+ Arc | KO  | SAL  | KO control | 12 | 8  | 4  | 485,802778 | 56,8661062 |
| Periphery Zone    | OT treatment         | 14 | WT  | Neo+ Arc | WT  | OT20 | WT control | 19 | 8  | 11 | 520,212281 | 58,8471458 |
| Periphery Zone    | OT treatment         | 14 | WT  | Neo+ Arc | WT  | SAL  | WT control | 15 | 7  | 8  | 516,68     | 43,2995579 |
| Periphery Zone    | OT treatment         | 21 | KO  | Neo+ Arc | KO  | OT20 | KO control | 16 | 10 | 6  | 477,60625  | 58,257916  |
| Periphery Zone    | OT treatment         | 21 | KO  | Neo+ Arc | KO  | SAL  | KO control | 12 | 8  | 4  | 530,177778 | 28,2172321 |
| Periphery Zone    | OT treatment         | 21 | NA  | Neo+ Arc | NA  | NA   | NA         | 3  | 0  | 0  | 0,03333333 | 0          |
| Periphery Zone    | OT treatment         | 21 | WT  | Neo+ Arc | WT  | OT20 | WT control | 19 | 8  | 11 | 552,04386  | 35,4006069 |
| Periphery Zone    | OT treatment         | 21 | WT  | Neo+ Arc | WT  | SAL  | WT control | 15 | 7  | 8  | 529,868889 | 39,2695376 |

|                |                      |    |     |          |     |      |            |    |    |    |             |            |
|----------------|----------------------|----|-----|----------|-----|------|------------|----|----|----|-------------|------------|
| Periphery Zone | OT treatment         | 28 | KO  | Neo+ Arc | KO  | OT20 | KO control | 16 | 10 | 6  | 502,145833  | 51,0251077 |
| Periphery Zone | OT treatment         | 28 | KO  | Neo+ Arc | KO  | SAL  | KO control | 12 | 8  | 4  | 530,202778  | 39,9324998 |
| Periphery Zone | OT treatment         | 28 | WT  | Neo+ Arc | WT  | OT20 | WT control | 19 | 8  | 11 | 543,731579  | 30,0531268 |
| Periphery Zone | OT treatment         | 28 | WT  | Neo+ Arc | WT  | SAL  | WT control | 15 | 7  | 8  | 459,18      | 103,457006 |
| Rearing        | OT treatment         | 1  | KO  | Neo+ Arc | KO  | OT20 | KO control | 15 | 9  | 6  | 5,68888889  | 5,49169166 |
| Rearing        | OT treatment         | 1  | KO  | Neo+ Arc | KO  | SAL  | KO control | 12 | 8  | 4  | 3,65555556  | 3,22616617 |
| Rearing        | OT treatment         | 1  | WT  | Neo+ Arc | WT  | OT20 | WT control | 19 | 8  | 11 | 2,54385965  | 2,01258548 |
| Rearing        | OT treatment         | 1  | WT  | Neo+ Arc | WT  | SAL  | WT control | 15 | 7  | 8  | 4,63777778  | 3,08991875 |
| Rearing        | OT treatment         | 7  | KO  | Neo+ Arc | KO  | OT20 | KO control | 16 | 10 | 6  | 4,88958333  | 2,67824483 |
| Rearing        | OT treatment         | 7  | KO  | Neo+ Arc | KO  | SAL  | KO control | 12 | 8  | 4  | 4,575       | 2,77208761 |
| Rearing        | OT treatment         | 7  | WT  | Neo+ Arc | WT  | OT20 | WT control | 19 | 8  | 11 | 4,06140351  | 2,54973403 |
| Rearing        | OT treatment         | 7  | WT  | Neo+ Arc | WT  | SAL  | WT control | 15 | 7  | 8  | 3,40888889  | 3,12949275 |
| Rearing        | OT treatment         | 14 | KO  | Neo+ Arc | KO  | OT20 | KO control | 16 | 10 | 6  | 5,17291667  | 3,39516473 |
| Rearing        | OT treatment         | 14 | KO  | Neo+ Arc | KO  | SAL  | KO control | 12 | 8  | 4  | 4,18888889  | 2,66845899 |
| Rearing        | OT treatment         | 14 | WT  | Neo+ Arc | WT  | OT20 | WT control | 19 | 8  | 11 | 1,38947368  | 1,41176943 |
| Rearing        | OT treatment         | 14 | WT  | Neo+ Arc | WT  | SAL  | WT control | 14 | 7  | 7  | 2,8         | 2,56411795 |
| Rearing        | OT treatment         | 21 | KO  | Neo+ Arc | KO  | OT20 | KO control | 15 | 9  | 6  | 2,90888889  | 2,24776668 |
| Rearing        | OT treatment         | 21 | KO  | Neo+ Arc | KO  | SAL  | KO control | 12 | 8  | 4  | 2,96944444  | 2,3765461  |
| Rearing        | OT treatment         | 21 | WT  | Neo+ Arc | WT  | OT20 | WT control | 19 | 8  | 11 | 1,36666667  | 1,36522055 |
| Rearing        | OT treatment         | 21 | WT  | Neo+ Arc | WT  | SAL  | WT control | 15 | 7  | 8  | 1,8         | 1,76841782 |
| Rearing        | OT treatment         | 28 | KO  | Neo+ Arc | KO  | OT20 | KO control | 16 | 10 | 6  | 2,88958333  | 2,64086739 |
| Rearing        | OT treatment         | 28 | KO  | Neo+ Arc | KO  | SAL  | KO control | 12 | 8  | 4  | 2,31944444  | 2,09344616 |
| Rearing        | OT treatment         | 28 | WT  | Neo+ Arc | WT  | OT20 | WT control | 19 | 8  | 11 | 1,5245614   | 1,67788234 |
| Rearing        | OT treatment         | 28 | WT  | Neo+ Arc | WT  | SAL  | WT control | 15 | 7  | 8  | 1,48        | 1,21510337 |
| Rearing        | genotype differences | 1  | KO  | Neo- Arc | NA  | NA   | KO control | 30 | 15 | 15 | 7,09111111  | 6,26281328 |
| Rearing        | genotype differences | 1  | WT  | Neo- Arc | NA  | NA   | WT control | 30 | 15 | 15 | 3,93444444  | 4,59728792 |
| Rearing        | genotype differences | 2  | KO  | Neo- Arc | NA  | NA   | KO control | 31 | 15 | 16 | 4,4172043   | 4,33061343 |
| Rearing        | genotype differences | 2  | WT  | Neo- Arc | NA  | NA   | WT control | 29 | 14 | 15 | 5,02183908  | 4,89392461 |
| Rearing        | genotype differences | 3  | KO  | Neo- Arc | NA  | NA   | KO control | 31 | 15 | 16 | 3,68602151  | 3,16811399 |
| Rearing        | genotype differences | 3  | WT  | Neo- Arc | NA  | NA   | WT control | 30 | 15 | 15 | 5,09888889  | 4,35714486 |
| Rearing        | social enrichment    | 1  | +/- | Neo+ Arc | NA  | NA   | enriched   | 18 | 11 | 7  | 2,16481481  | 1,85456414 |
| Rearing        | social enrichment    | 1  | +/- | Neo+ Arc | NA  | NA   | social     | 17 | 11 | 6  | 2,41176471  | 2,44699195 |
| Rearing        | social enrichment    | 1  | KO  | Neo+ Arc | NA  | NA   | enriched   | 13 | 6  | 7  | 2,26153846  | 2,11287263 |
| Rearing        | social enrichment    | 1  | KO  | Neo+ Arc | NA  | NA   | non-social | 31 | 20 | 11 | 1,94623656  | 1,6950839  |
| Rearing        | social enrichment    | 1  | WT  | Neo+ Arc | NA  | NA   | enriched   | 7  | 5  | 2  | 2,6952381   | 2,26743684 |
| Rearing        | social enrichment    | 1  | WT  | Neo+ Arc | NA  | NA   | social     | 47 | 31 | 16 | 2,83049645  | 3,42907313 |
| Rearing        | social enrichment    | 2  | +/- | Neo+ Arc | NA  | NA   | enriched   | 16 | 9  | 7  | 2,38958333  | 1,74736707 |
| Rearing        | social enrichment    | 2  | +/- | Neo+ Arc | NA  | NA   | social     | 7  | 2  | 5  | 3,38571429  | 1,95380513 |
| Rearing        | social enrichment    | 2  | KO  | Neo+ Arc | NA  | NA   | enriched   | 12 | 5  | 7  | 2,51111111  | 3,04734802 |
| Rearing        | social enrichment    | 2  | KO  | Neo+ Arc | NA  | NA   | non-social | 23 | 12 | 11 | 2,42173913  | 2,25692221 |
| Rearing        | social enrichment    | 2  | WT  | Neo+ Arc | NA  | NA   | enriched   | 7  | 5  | 2  | 2,23809524  | 1,23219596 |
| Rearing        | social enrichment    | 2  | WT  | Neo+ Arc | NA  | NA   | social     | 43 | 26 | 17 | 2,70077519  | 2,93196657 |
| Rearing        | social enrichment    | 3  | +/- | Neo+ Arc | NA  | NA   | enriched   | 17 | 10 | 7  | 2,41568627  | 2,02831066 |
| Rearing        | social enrichment    | 3  | +/- | Neo+ Arc | NA  | NA   | social     | 11 | 6  | 5  | 3,56666667  | 3,82973744 |
| Rearing        | social enrichment    | 3  | KO  | Neo+ Arc | NA  | NA   | enriched   | 12 | 5  | 7  | 2,425       | 1,62934733 |
| Rearing        | social enrichment    | 3  | KO  | Neo+ Arc | NA  | NA   | non-social | 24 | 12 | 12 | 2,27638889  | 2,3385548  |
| Rearing        | social enrichment    | 3  | WT  | Neo+ Arc | NA  | NA   | enriched   | 7  | 5  | 2  | 4,5952381   | 2,94224836 |
| Rearing        | social enrichment    | 3  | WT  | Neo+ Arc | NA  | NA   | social     | 38 | 24 | 14 | 2,61842105  | 2,34414096 |
| SAP            | OT treatment         | 1  | KO  | Neo+ Arc | KO  | OT20 | KO control | 16 | 10 | 6  | 9,80416667  | 5,78145022 |
| SAP            | OT treatment         | 1  | KO  | Neo+ Arc | KO  | SAL  | KO control | 12 | 8  | 4  | 9,71388889  | 4,31189237 |
| SAP            | OT treatment         | 1  | WT  | Neo+ Arc | WT  | OT20 | WT control | 19 | 8  | 11 | 7,85964912  | 3,38915443 |
| SAP            | OT treatment         | 1  | WT  | Neo+ Arc | WT  | SAL  | WT control | 15 | 7  | 8  | 6,86        | 3,07328995 |
| SAP            | OT treatment         | 7  | KO  | Neo+ Arc | KO  | OT20 | KO control | 16 | 10 | 6  | 8,59583333  | 2,93201675 |
| SAP            | OT treatment         | 7  | KO  | Neo+ Arc | KO  | SAL  | KO control | 12 | 8  | 4  | 8,52222222  | 3,05638373 |
| SAP            | OT treatment         | 7  | WT  | Neo+ Arc | WT  | OT20 | WT control | 19 | 8  | 11 | 12,5947368  | 7,59249356 |
| SAP            | OT treatment         | 7  | WT  | Neo+ Arc | WT  | SAL  | WT control | 15 | 7  | 8  | 12,01555556 | 8,83980775 |
| SAP            | OT treatment         | 14 | KO  | Neo+ Arc | KO  | OT20 | KO control | 16 | 10 | 6  | 8,34791667  | 3,77816277 |
| SAP            | OT treatment         | 14 | KO  | Neo+ Arc | KO  | SAL  | KO control | 12 | 8  | 4  | 7,79722222  | 2,77424877 |
| SAP            | OT treatment         | 14 | WT  | Neo+ Arc | WT  | OT20 | WT control | 19 | 8  | 11 | 14,0210526  | 8,71861362 |
| SAP            | OT treatment         | 14 | WT  | Neo+ Arc | WT  | SAL  | WT control | 15 | 7  | 8  | 11,7577778  | 8,33734634 |
| SAP            | OT treatment         | 21 | KO  | Neo+ Arc | KO  | OT20 | KO control | 16 | 10 | 6  | 9,51666667  | 4,95571499 |
| SAP            | OT treatment         | 21 | KO  | Neo+ Arc | KO  | SAL  | KO control | 12 | 8  | 4  | 11,56666667 | 3,58399923 |
| SAP            | OT treatment         | 21 | WT  | Neo+ Arc | WT  | OT20 | WT control | 19 | 8  | 11 | 11,0070175  | 5,89910622 |
| SAP            | OT treatment         | 21 | WT  | Neo+ Arc | WT  | SAL  | WT control | 15 | 7  | 8  | 10,9888889  | 5,64063582 |
| SAP            | OT treatment         | 28 | KO  | Neo+ Arc | KO  | OT20 | KO control | 16 | 10 | 6  | 8,12708333  | 3,71984107 |
| SAP            | OT treatment         | 28 | KO  | Neo+ Arc | KO  | SAL  | KO control | 12 | 8  | 4  | 9,88055556  | 3,3484644  |
| SAP            | OT treatment         | 28 | WT  | Neo+ Arc | WT  | OT20 | WT control | 19 | 8  | 11 | 12,422807   | 8,72075043 |
| SAP            | OT treatment         | 28 | WT  | Neo+ Arc | WT  | SAL  | WT control | 15 | 7  | 8  | 8,91555556  | 5,15157345 |
| SAP            | genotype differences | 1  | +/- | Neo+ Arc | +/- | NA   | NA         | 32 | 16 | 16 | 10,846875   | 4,32393405 |
| SAP            | genotype differences | 1  | +/- | Neo+ Arc | -/- | NA   | NA         | 28 | 16 | 12 | 12,3821429  | 4,41653722 |
| SAP            | genotype differences | 1  | KO  | Neo+ Arc | NA  | NA   | KO control | 13 | 6  | 7  | 18,2923077  | 6,71685489 |
| SAP            | genotype differences | 1  | KO  | Neo- Arc | NA  | NA   | KO control | 31 | 15 | 16 | 10,1709677  | 5,47815015 |
| SAP            | genotype differences | 1  | WT  | Neo+ Arc | NA  | NA   | WT control | 19 | 8  | 11 | 14,2684211  | 4,69523627 |
| SAP            | genotype differences | 1  | WT  | Neo- Arc | NA  | NA   | WT control | 30 | 15 | 15 | 9,37        | 5,27608898 |
| SAP            | genotype differences | 2  | +/- | Neo+ Arc | +/- | NA   | NA         | 32 | 16 | 16 | 12,5        | 4,9714093  |
| SAP            | genotype differences | 2  | +/- | Neo+ Arc | -/- | NA   | NA         | 27 | 15 | 12 | 12,1493827  | 4,19738798 |
| SAP            | genotype differences | 2  | KO  | Neo+ Arc | NA  | NA   | KO control | 12 | 6  | 6  | 17,0388889  | 4,3578058  |
| SAP            | genotype differences | 2  | KO  | Neo- Arc | NA  | NA   | KO control | 31 | 15 | 16 | 12,3376344  | 5,38523181 |
| SAP            | genotype differences | 2  | WT  | Neo+ Arc | NA  | NA   | WT control | 18 | 8  | 10 | 15,1425926  | 5,1524955  |
| SAP            | genotype differences | 2  | WT  | Neo- Arc | NA  | NA   | WT control | 30 | 15 | 15 | 10,9611111  | 4,16999025 |
| SAP            | genotype differences | 3  | KO  | Neo- Arc | NA  | NA   | KO control | 31 | 15 | 16 | 15,9376344  | 5,18661912 |
| SAP            | genotype differences | 3  | WT  | Neo- Arc | NA  | NA   | WT control | 30 | 15 | 15 | 10,1788889  | 4,9185043  |
| SAP            | social enrichment    | 1  | +/- | Neo+ Arc | NA  | NA   | enriched   | 18 | 11 | 7  | 4,43518519  | 3,06494991 |
| SAP            | social enrichment    | 1  | +/- | Neo+ Arc | NA  | NA   | social     | 17 | 11 | 6  | 2,89607843  | 1,63842244 |
| SAP            | social enrichment    | 1  | KO  | Neo+ Arc | NA  | NA   | enriched   | 13 | 6  | 7  | 6,08205128  | 2,44455614 |
| SAP            | social enrichment    | 1  | KO  | Neo+ Arc | NA  | NA   | non-social | 34 | 22 | 12 | 4,10294118  | 2,21495328 |
| SAP            | social enrichment    | 1  | WT  | Neo+ Arc | NA  | NA   | enriched   | 7  | 5  | 2  | 8,3         | 4,07644544 |
| SAP            | social enrichment    | 1  | WT  | Neo+ Arc | NA  | NA   | social     | 48 | 31 | 17 | 4,09722222  | 3,48784335 |
| SAP            | social enrichment    | 2  | +/- | Neo+ Arc | NA  | NA   | enriched   | 16 | 9  | 7  | 4,22708333  | 1,83049148 |
| SAP            | social enrichment    | 2  | +/- | Neo+ Arc | NA  | NA   | social     | 8  | 3  | 5  | 4,475       | 1,25391451 |

|                 |                      |    |     |          |     |      |            |    |    |    |            |            |
|-----------------|----------------------|----|-----|----------|-----|------|------------|----|----|----|------------|------------|
| SAP             | social enrichment    | 2  | KO  | Neo+ Arc | NA  | NA   | enriched   | 12 | 5  | 7  | 6,45277778 | 2,76622699 |
| SAP             | social enrichment    | 2  | KO  | Neo+ Arc | NA  | NA   | non-social | 24 | 12 | 12 | 5,44027778 | 2,56919655 |
| SAP             | social enrichment    | 2  | WT  | Neo+ Arc | NA  | NA   | enriched   | 7  | 5  | 2  | 7,10952381 | 1,90979098 |
| SAP             | social enrichment    | 2  | WT  | Neo+ Arc | NA  | NA   | social     | 43 | 26 | 17 | 4,31472868 | 2,11482925 |
| SAP             | social enrichment    | 3  | +/- | Neo+ Arc | NA  | NA   | enriched   | 17 | 10 | 7  | 3,9745098  | 2,345342   |
| SAP             | social enrichment    | 3  | +/- | Neo+ Arc | NA  | NA   | social     | 11 | 6  | 5  | 6,71212121 | 2,31896877 |
| SAP             | social enrichment    | 3  | KO  | Neo+ Arc | NA  | NA   | enriched   | 12 | 5  | 7  | 6,81388889 | 3,20083507 |
| SAP             | social enrichment    | 3  | KO  | Neo+ Arc | NA  | NA   | non-social | 24 | 12 | 12 | 5,78472222 | 2,90611514 |
| SAP             | social enrichment    | 3  | WT  | Neo+ Arc | NA  | NA   | enriched   | 7  | 5  | 2  | 7,5        | 1,88345624 |
| SAP             | social enrichment    | 3  | WT  | Neo+ Arc | NA  | NA   | social     | 39 | 24 | 15 | 4,92307692 | 3,24920282 |
| Social approach | OT treatment         | 1  | KO  | Neo+ Arc | KO  | OT20 | KO control | 16 | 10 | 6  | 70,9145833 | 25,5683078 |
| Social approach | OT treatment         | 1  | KO  | Neo+ Arc | KO  | SAL  | KO control | 12 | 8  | 4  | 85,1694444 | 15,0840036 |
| Social approach | OT treatment         | 1  | WT  | Neo+ Arc | WT  | OT20 | WT control | 19 | 8  | 11 | 93,2350877 | 21,6056333 |
| Social approach | OT treatment         | 1  | WT  | Neo+ Arc | WT  | SAL  | WT control | 15 | 7  | 8  | 100,637778 | 22,4371003 |
| Social approach | OT treatment         | 7  | KO  | Neo+ Arc | KO  | OT20 | KO control | 16 | 10 | 6  | 73,5375    | 23,4386982 |
| Social approach | OT treatment         | 7  | KO  | Neo+ Arc | KO  | SAL  | KO control | 12 | 8  | 4  | 85,3194444 | 10,4237148 |
| Social approach | OT treatment         | 7  | WT  | Neo+ Arc | WT  | OT20 | WT control | 19 | 8  | 11 | 91,1912281 | 26,0730215 |
| Social approach | OT treatment         | 7  | WT  | Neo+ Arc | WT  | SAL  | WT control | 15 | 7  | 8  | 97,8355556 | 27,9380999 |
| Social approach | OT treatment         | 14 | KO  | Neo+ Arc | KO  | OT20 | KO control | 16 | 10 | 6  | 77,3958333 | 17,5007211 |
| Social approach | OT treatment         | 14 | KO  | Neo+ Arc | KO  | SAL  | KO control | 12 | 8  | 4  | 86,4305556 | 16,5952132 |
| Social approach | OT treatment         | 14 | WT  | Neo+ Arc | WT  | OT20 | WT control | 19 | 8  | 11 | 95,1736842 | 33,2238007 |
| Social approach | OT treatment         | 14 | WT  | Neo+ Arc | WT  | SAL  | WT control | 15 | 7  | 8  | 90,0111111 | 24,0084002 |
| Social approach | OT treatment         | 21 | KO  | Neo+ Arc | KO  | OT20 | KO control | 16 | 10 | 6  | 85,9270833 | 20,5767154 |
| Social approach | OT treatment         | 21 | KO  | Neo+ Arc | KO  | SAL  | KO control | 12 | 8  | 4  | 111,580556 | 33,7395714 |
| Social approach | OT treatment         | 21 | WT  | Neo+ Arc | WT  | OT20 | WT control | 19 | 8  | 11 | 101,450877 | 40,0574254 |
| Social approach | OT treatment         | 21 | WT  | Neo+ Arc | WT  | SAL  | WT control | 15 | 7  | 8  | 110,828889 | 28,2456567 |
| Social approach | OT treatment         | 28 | KO  | Neo+ Arc | KO  | OT20 | KO control | 16 | 10 | 6  | 94,2479167 | 21,2840958 |
| Social approach | OT treatment         | 28 | KO  | Neo+ Arc | KO  | SAL  | KO control | 12 | 8  | 4  | 108,805556 | 26,1735383 |
| Social approach | OT treatment         | 28 | WT  | Neo+ Arc | WT  | OT20 | WT control | 19 | 8  | 11 | 102,984211 | 44,5198144 |
| Social approach | OT treatment         | 28 | WT  | Neo+ Arc | WT  | SAL  | WT control | 15 | 7  | 8  | 84,6066667 | 28,7489439 |
| Social approach | genotype differences | 1  | +/- | Neo+ Arc | +/+ | NA   | NA         | 32 | 16 | 16 | 63,4072917 | 12,7492912 |
| Social approach | genotype differences | 1  | +/- | Neo+ Arc | -/- | NA   | NA         | 28 | 16 | 12 | 59,2642857 | 11,699284  |
| Social approach | genotype differences | 1  | KO  | Neo+ Arc | NA  | NA   | KO control | 13 | 6  | 7  | 37,8769231 | 14,9482031 |
| Social approach | genotype differences | 1  | KO  | Neo- Arc | NA  | NA   | KO control | 31 | 15 | 16 | 60,0505376 | 24,1375455 |
| Social approach | genotype differences | 1  | WT  | Neo+ Arc | NA  | NA   | WT control | 19 | 8  | 11 | 53,2964912 | 24,1228361 |
| Social approach | genotype differences | 1  | WT  | Neo- Arc | NA  | NA   | WT control | 30 | 15 | 15 | 52,9277778 | 17,7210096 |
| Social approach | genotype differences | 2  | +/- | Neo+ Arc | +/+ | NA   | NA         | 32 | 16 | 16 | 98,9083333 | 20,7320195 |
| Social approach | genotype differences | 2  | +/- | Neo+ Arc | -/- | NA   | NA         | 27 | 15 | 12 | 97,6012346 | 12,3547475 |
| Social approach | genotype differences | 2  | KO  | Neo+ Arc | NA  | NA   | KO control | 12 | 6  | 6  | 64,9833333 | 12,584434  |
| Social approach | genotype differences | 2  | KO  | Neo- Arc | NA  | NA   | KO control | 31 | 15 | 16 | 94,6462366 | 20,6541946 |
| Social approach | genotype differences | 2  | WT  | Neo+ Arc | NA  | NA   | WT control | 18 | 8  | 10 | 78,9203704 | 18,9232061 |
| Social approach | genotype differences | 2  | WT  | Neo- Arc | NA  | NA   | WT control | 30 | 15 | 15 | 107,736667 | 19,2400292 |
| Social approach | genotype differences | 3  | KO  | Neo- Arc | NA  | NA   | KO control | 31 | 15 | 16 | 125,326882 | 40,8965311 |
| Social approach | genotype differences | 3  | WT  | Neo- Arc | NA  | NA   | WT control | 30 | 15 | 15 | 107,176667 | 21,4387806 |
| Social approach | social enrichment    | 1  | +/- | Neo+ Arc | NA  | NA   | enriched   | 18 | 11 | 7  | 37,212963  | 9,26040936 |
| Social approach | social enrichment    | 1  | +/- | Neo+ Arc | NA  | NA   | social     | 17 | 11 | 6  | 29,7529412 | 12,301677  |
| Social approach | social enrichment    | 1  | KO  | Neo+ Arc | NA  | NA   | enriched   | 13 | 6  | 7  | 29,3230769 | 10,4554291 |
| Social approach | social enrichment    | 1  | KO  | Neo+ Arc | NA  | NA   | non-social | 34 | 22 | 12 | 16,9823529 | 4,67744236 |
| Social approach | social enrichment    | 1  | WT  | Neo+ Arc | NA  | NA   | enriched   | 7  | 5  | 2  | 35,5       | 5,77042267 |
| Social approach | social enrichment    | 1  | WT  | Neo+ Arc | NA  | NA   | social     | 48 | 31 | 17 | 28,0493056 | 10,6578509 |
| Social approach | social enrichment    | 2  | +/- | Neo+ Arc | NA  | NA   | enriched   | 16 | 9  | 7  | 63,3       | 14,5407473 |
| Social approach | social enrichment    | 2  | +/- | Neo+ Arc | NA  | NA   | social     | 8  | 3  | 5  | 64,0583333 | 21,7730046 |
| Social approach | social enrichment    | 2  | KO  | Neo+ Arc | NA  | NA   | enriched   | 12 | 5  | 7  | 55,8       | 14,3210236 |
| Social approach | social enrichment    | 2  | KO  | Neo+ Arc | NA  | NA   | non-social | 24 | 12 | 12 | 56,2486111 | 15,4189543 |
| Social approach | social enrichment    | 2  | WT  | Neo+ Arc | NA  | NA   | enriched   | 7  | 5  | 2  | 63,2142857 | 17,2406374 |
| Social approach | social enrichment    | 2  | WT  | Neo+ Arc | NA  | NA   | social     | 43 | 26 | 17 | 61,2224806 | 16,7056429 |
| Social approach | social enrichment    | 3  | +/- | Neo+ Arc | NA  | NA   | enriched   | 17 | 10 | 7  | 56,5019608 | 20,2367943 |
| Social approach | social enrichment    | 3  | +/- | Neo+ Arc | NA  | NA   | social     | 11 | 6  | 5  | 51,8969697 | 12,1896172 |
| Social approach | social enrichment    | 3  | KO  | Neo+ Arc | NA  | NA   | enriched   | 12 | 5  | 7  | 44,6333333 | 7,4936741  |
| Social approach | social enrichment    | 3  | KO  | Neo+ Arc | NA  | NA   | non-social | 24 | 12 | 12 | 49,2416667 | 10,1473266 |
| Social approach | social enrichment    | 3  | WT  | Neo+ Arc | NA  | NA   | enriched   | 7  | 5  | 2  | 56,1380952 | 21,6496466 |
| Social approach | social enrichment    | 3  | WT  | Neo+ Arc | NA  | NA   | social     | 39 | 24 | 15 | 57,4589744 | 13,9358628 |
| Social escape   | OT treatment         | 1  | KO  | Neo+ Arc | KO  | OT20 | KO control | 16 | 10 | 6  | 49,4979167 | 18,2522996 |
| Social escape   | OT treatment         | 1  | KO  | Neo+ Arc | KO  | SAL  | KO control | 12 | 8  | 4  | 58,5222222 | 13,2813862 |
| Social escape   | OT treatment         | 1  | WT  | Neo+ Arc | WT  | OT20 | WT control | 19 | 8  | 11 | 67,7982456 | 19,162249  |
| Social escape   | OT treatment         | 1  | WT  | Neo+ Arc | WT  | SAL  | WT control | 15 | 7  | 8  | 71,4844444 | 16,7331003 |
| Social escape   | OT treatment         | 7  | KO  | Neo+ Arc | KO  | OT20 | KO control | 16 | 10 | 6  | 50,9895833 | 17,3568333 |
| Social escape   | OT treatment         | 7  | KO  | Neo+ Arc | KO  | SAL  | KO control | 12 | 8  | 4  | 61,6194444 | 8,39596414 |
| Social escape   | OT treatment         | 7  | WT  | Neo+ Arc | WT  | OT20 | WT control | 19 | 8  | 11 | 52,1631579 | 22,1148961 |
| Social escape   | OT treatment         | 7  | WT  | Neo+ Arc | WT  | SAL  | WT control | 15 | 7  | 8  | 58,9866667 | 23,9791172 |
| Social escape   | OT treatment         | 14 | KO  | Neo+ Arc | KO  | OT20 | KO control | 16 | 10 | 6  | 54,2479167 | 13,5306181 |
| Social escape   | OT treatment         | 14 | KO  | Neo+ Arc | KO  | SAL  | KO control | 12 | 8  | 4  | 61,65      | 8,84163132 |
| Social escape   | OT treatment         | 14 | WT  | Neo+ Arc | WT  | OT20 | WT control | 19 | 8  | 11 | 51,3982456 | 27,040056  |
| Social escape   | OT treatment         | 14 | WT  | Neo+ Arc | WT  | SAL  | WT control | 15 | 7  | 8  | 56,4422222 | 25,0146607 |
| Social escape   | OT treatment         | 21 | KO  | Neo+ Arc | KO  | OT20 | KO control | 16 | 10 | 6  | 58,1104167 | 17,2415077 |
| Social escape   | OT treatment         | 21 | KO  | Neo+ Arc | KO  | SAL  | KO control | 12 | 8  | 4  | 75,7972222 | 18,5230812 |
| Social escape   | OT treatment         | 21 | WT  | Neo+ Arc | WT  | OT20 | WT control | 19 | 8  | 11 | 56,1578947 | 25,8179066 |
| Social escape   | OT treatment         | 21 | WT  | Neo+ Arc | WT  | SAL  | WT control | 15 | 7  | 8  | 64,2577778 | 24,1369455 |
| Social escape   | OT treatment         | 28 | KO  | Neo+ Arc | KO  | OT20 | KO control | 16 | 10 | 6  | 65,7791667 | 19,236173  |
| Social escape   | OT treatment         | 28 | KO  | Neo+ Arc | KO  | SAL  | KO control | 12 | 8  | 4  | 76,6111111 | 21,8178841 |
| Social escape   | OT treatment         | 28 | WT  | Neo+ Arc | WT  | OT20 | WT control | 19 | 8  | 11 | 62,222807  | 33,6558913 |
| Social escape   | OT treatment         | 28 | WT  | Neo+ Arc | WT  | SAL  | WT control | 15 | 7  | 8  | 52,0066667 | 20,2596722 |
| Social escape   | genotype differences | 1  | KO  | Neo- Arc | NA  | NA   | KO control | 31 | 15 | 16 | 37,3032258 | 15,4882497 |
| Social escape   | genotype differences | 1  | WT  | Neo- Arc | NA  | NA   | WT control | 30 | 15 | 15 | 37,4366667 | 16,2861936 |
| Social escape   | genotype differences | 2  | KO  | Neo- Arc | NA  | NA   | KO control | 31 | 15 | 16 | 58,0849462 | 16,7177214 |
| Social escape   | genotype differences | 2  | WT  | Neo- Arc | NA  | NA   | WT control | 30 | 15 | 15 | 66,5255556 | 16,126627  |
| Social escape   | genotype differences | 3  | KO  | Neo- Arc | NA  | NA   | KO control | 31 | 15 | 16 | 64,688172  | 21,168685  |
| Social escape   | genotype differences | 3  | WT  | Neo- Arc | NA  | NA   | WT control | 30 | 15 | 15 | 73,2855556 | 16,0828332 |
| Social escape   | social enrichment    | 1  | +/- | Neo+ Arc | NA  | NA   | enriched   | 18 | 11 | 7  | 27,7833333 | 7,61545771 |
| Social escape   | social enrichment    | 1  | +/- | Neo+ Arc | NA  | NA   | social     | 17 | 11 | 6  | 25,3137255 | 10,1245443 |

|               |                      |       |         |     |      |            |    |    |    |            |            |
|---------------|----------------------|-------|---------|-----|------|------------|----|----|----|------------|------------|
| Social escape | social enrichment    | 1 KO  | Neo+Arc | NA  | NA   | enriched   | 13 | 6  | 7  | 24,3128205 | 7,22583506 |
| Social escape | social enrichment    | 1 KO  | Neo+Arc | NA  | NA   | non-social | 34 | 22 | 12 | 12,8696078 | 3,82446816 |
| Social escape | social enrichment    | 1 WT  | Neo+Arc | NA  | NA   | enriched   | 7  | 5  | 2  | 27,5666667 | 7,02245077 |
| Social escape | social enrichment    | 1 WT  | Neo+Arc | NA  | NA   | social     | 48 | 31 | 17 | 22,8118056 | 9,72036805 |
| Social escape | social enrichment    | 2 +/- | Neo+Arc | NA  | NA   | enriched   | 16 | 9  | 7  | 48,5395833 | 11,0639703 |
| Social escape | social enrichment    | 2 +/- | Neo+Arc | NA  | NA   | social     | 8  | 3  | 5  | 48,325     | 12,5201393 |
| Social escape | social enrichment    | 2 KO  | Neo+Arc | NA  | NA   | enriched   | 12 | 5  | 7  | 39,1527778 | 8,92107321 |
| Social escape | social enrichment    | 2 KO  | Neo+Arc | NA  | NA   | non-social | 24 | 12 | 12 | 40,4319444 | 11,8670676 |
| Social escape | social enrichment    | 2 WT  | Neo+Arc | NA  | NA   | enriched   | 7  | 5  | 2  | 45,9428571 | 11,0423715 |
| Social escape | social enrichment    | 2 WT  | Neo+Arc | NA  | NA   | social     | 43 | 26 | 17 | 44,0581395 | 10,0716904 |
| Social escape | social enrichment    | 3 +/- | Neo+Arc | NA  | NA   | enriched   | 17 | 10 | 7  | 43,372549  | 12,926476  |
| Social escape | social enrichment    | 3 +/- | Neo+Arc | NA  | NA   | social     | 11 | 6  | 5  | 39,7878788 | 7,65926125 |
| Social escape | social enrichment    | 3 KO  | Neo+Arc | NA  | NA   | enriched   | 12 | 5  | 7  | 30,8194444 | 7,98715457 |
| Social escape | social enrichment    | 3 KO  | Neo+Arc | NA  | NA   | non-social | 24 | 12 | 12 | 34,5541667 | 7,43996138 |
| Social escape | social enrichment    | 3 WT  | Neo+Arc | NA  | NA   | enriched   | 7  | 5  | 2  | 38,7904762 | 10,7552178 |
| Social escape | social enrichment    | 3 WT  | Neo+Arc | NA  | NA   | social     | 39 | 24 | 15 | 42,5641026 | 10,5793144 |
| Stop isolated | OT treatment         | 1 KO  | Neo+Arc | KO  | OT20 | KO control | 16 | 10 | 6  | 286,05625  | 77,8183104 |
| Stop isolated | OT treatment         | 1 KO  | Neo+Arc | KO  | SAL  | KO control | 12 | 8  | 4  | 298,819444 | 42,3693821 |
| Stop isolated | OT treatment         | 1 WT  | Neo+Arc | WT  | OT20 | WT control | 19 | 8  | 11 | 224,959649 | 61,1855028 |
| Stop isolated | OT treatment         | 1 WT  | Neo+Arc | WT  | SAL  | WT control | 15 | 7  | 8  | 217,026667 | 50,986259  |
| Stop isolated | OT treatment         | 7 KO  | Neo+Arc | KO  | OT20 | KO control | 16 | 10 | 6  | 302,564583 | 51,8198596 |
| Stop isolated | OT treatment         | 7 KO  | Neo+Arc | KO  | SAL  | KO control | 12 | 8  | 4  | 280,436111 | 27,3458931 |
| Stop isolated | OT treatment         | 7 WT  | Neo+Arc | WT  | OT20 | WT control | 19 | 8  | 11 | 294,964912 | 74,4904721 |
| Stop isolated | OT treatment         | 7 WT  | Neo+Arc | WT  | SAL  | WT control | 15 | 7  | 8  | 264,437778 | 74,2618574 |
| Stop isolated | OT treatment         | 14 KO | Neo+Arc | KO  | OT20 | KO control | 16 | 10 | 6  | 298,558333 | 54,0342121 |
| Stop isolated | OT treatment         | 14 KO | Neo+Arc | KO  | SAL  | KO control | 12 | 8  | 4  | 288,922222 | 39,055998  |
| Stop isolated | OT treatment         | 14 WT | Neo+Arc | WT  | OT20 | WT control | 19 | 8  | 11 | 269,924561 | 105,88563  |
| Stop isolated | OT treatment         | 14 WT | Neo+Arc | WT  | SAL  | WT control | 15 | 7  | 8  | 279,117778 | 85,3930314 |
| Stop isolated | OT treatment         | 21 KO | Neo+Arc | KO  | OT20 | KO control | 16 | 10 | 6  | 295,789583 | 58,5811191 |
| Stop isolated | OT treatment         | 21 KO | Neo+Arc | KO  | SAL  | KO control | 12 | 8  | 4  | 236,602778 | 57,671239  |
| Stop isolated | OT treatment         | 21 WT | Neo+Arc | WT  | OT20 | WT control | 15 | 8  | 7  | 274,826667 | 97,6900364 |
| Stop isolated | OT treatment         | 21 WT | Neo+Arc | WT  | SAL  | WT control | 15 | 7  | 8  | 263,217778 | 73,3562852 |
| Stop isolated | OT treatment         | 28 KO | Neo+Arc | KO  | OT20 | KO control | 16 | 10 | 6  | 254,229167 | 68,3965192 |
| Stop isolated | OT treatment         | 28 KO | Neo+Arc | KO  | SAL  | KO control | 12 | 8  | 4  | 257,077778 | 57,9811644 |
| Stop isolated | OT treatment         | 28 WT | Neo+Arc | WT  | OT20 | WT control | 18 | 7  | 11 | 263,537037 | 110,903305 |
| Stop isolated | OT treatment         | 28 WT | Neo+Arc | WT  | SAL  | WT control | 14 | 7  | 7  | 218,033333 | 117,860805 |
| Stop isolated | genotype differences | 1 +/- | Neo+Arc | +/+ | NA   | NA         | 32 | 16 | 16 | 279,959375 | 41,773964  |
| Stop isolated | genotype differences | 1 +/- | Neo+Arc | -/- | NA   | NA         | 28 | 16 | 12 | 289,519048 | 39,7208639 |
| Stop isolated | genotype differences | 1 KO  | Neo+Arc | NA  | NA   | KO control | 13 | 6  | 7  | 354,207692 | 35,3554599 |
| Stop isolated | genotype differences | 1 KO  | Neo-Arc | NA  | NA   | KO control | 31 | 15 | 16 | 318,587097 | 47,1566402 |
| Stop isolated | genotype differences | 1 WT  | Neo+Arc | NA  | NA   | WT control | 19 | 8  | 11 | 294,989474 | 56,2775343 |
| Stop isolated | genotype differences | 1 WT  | Neo-Arc | NA  | NA   | WT control | 30 | 15 | 15 | 296,844444 | 52,1096981 |
| Stop isolated | genotype differences | 2 +/- | Neo+Arc | +/+ | NA   | NA         | 32 | 16 | 16 | 262,689583 | 47,0205076 |
| Stop isolated | genotype differences | 2 +/- | Neo+Arc | -/- | NA   | NA         | 27 | 15 | 12 | 241,903704 | 37,2604008 |
| Stop isolated | genotype differences | 2 KO  | Neo+Arc | NA  | NA   | KO control | 12 | 6  | 6  | 336,738889 | 38,7256521 |
| Stop isolated | genotype differences | 2 KO  | Neo-Arc | NA  | NA   | KO control | 31 | 15 | 16 | 298,576344 | 49,3255739 |
| Stop isolated | genotype differences | 2 WT  | Neo+Arc | NA  | NA   | WT control | 18 | 8  | 10 | 270,112963 | 49,5311866 |
| Stop isolated | genotype differences | 2 WT  | Neo-Arc | NA  | NA   | WT control | 30 | 15 | 15 | 246,372222 | 39,4814677 |
| Stop isolated | genotype differences | 3 KO  | Neo-Arc | NA  | NA   | KO control | 31 | 15 | 16 | 267,658065 | 59,6056031 |
| Stop isolated | genotype differences | 3 WT  | Neo-Arc | NA  | NA   | WT control | 30 | 15 | 15 | 247,381111 | 49,0802843 |
| Stop isolated | social enrichment    | 1 +/- | Neo+Arc | NA  | NA   | enriched   | 18 | 11 | 7  | 115,524074 | 18,1377871 |
| Stop isolated | social enrichment    | 1 +/- | Neo+Arc | NA  | NA   | social     | 17 | 11 | 6  | 125,639216 | 20,4151334 |
| Stop isolated | social enrichment    | 1 KO  | Neo+Arc | NA  | NA   | enriched   | 13 | 6  | 7  | 140,407692 | 19,8837043 |
| Stop isolated | social enrichment    | 1 KO  | Neo+Arc | NA  | NA   | non-social | 34 | 22 | 12 | 153,194118 | 18,683233  |
| Stop isolated | social enrichment    | 1 WT  | Neo+Arc | NA  | NA   | enriched   | 7  | 5  | 2  | 120,871429 | 12,2339907 |
| Stop isolated | social enrichment    | 1 WT  | Neo+Arc | NA  | NA   | social     | 48 | 31 | 17 | 112,810417 | 28,986906  |
| Stop isolated | social enrichment    | 2 +/- | Neo+Arc | NA  | NA   | enriched   | 16 | 9  | 7  | 82,3791667 | 23,2573903 |
| Stop isolated | social enrichment    | 2 +/- | Neo+Arc | NA  | NA   | social     | 8  | 3  | 5  | 92,6541667 | 34,2777078 |
| Stop isolated | social enrichment    | 2 KO  | Neo+Arc | NA  | NA   | enriched   | 12 | 5  | 7  | 113,438889 | 25,1063791 |
| Stop isolated | social enrichment    | 2 KO  | Neo+Arc | NA  | NA   | non-social | 24 | 12 | 12 | 107,933333 | 27,2302297 |
| Stop isolated | social enrichment    | 2 WT  | Neo+Arc | NA  | NA   | enriched   | 7  | 5  | 2  | 90,0666667 | 30,923891  |
| Stop isolated | social enrichment    | 2 WT  | Neo+Arc | NA  | NA   | social     | 43 | 26 | 17 | 82,4139535 | 24,6369386 |
| Stop isolated | social enrichment    | 3 +/- | Neo+Arc | NA  | NA   | enriched   | 17 | 10 | 7  | 93,4392157 | 29,537338  |
| Stop isolated | social enrichment    | 3 +/- | Neo+Arc | NA  | NA   | social     | 11 | 6  | 5  | 104,721212 | 28,1957888 |
| Stop isolated | social enrichment    | 3 KO  | Neo+Arc | NA  | NA   | enriched   | 12 | 5  | 7  | 123,461111 | 17,1948303 |
| Stop isolated | social enrichment    | 3 KO  | Neo+Arc | NA  | NA   | non-social | 24 | 12 | 12 | 119,709722 | 23,943354  |
| Stop isolated | social enrichment    | 3 WT  | Neo+Arc | NA  | NA   | enriched   | 7  | 5  | 2  | 101,157143 | 28,1782009 |
| Stop isolated | social enrichment    | 3 WT  | Neo+Arc | NA  | NA   | social     | 39 | 24 | 15 | 87,8666667 | 28,1370674 |

| experiment           | day | event           | genotype    | KO_postweaning | treatment | y.      | group1      | group2      | n1 | n2 | statistic   | p          | p.adj      | p.adj.signif |
|----------------------|-----|-----------------|-------------|----------------|-----------|---------|-------------|-------------|----|----|-------------|------------|------------|--------------|
| genotype differences | 3   | Cuddling        | NA          | NA             | NA        | CumTime | Neo- Arc KO | WT          | 31 | 30 | -3,36861728 | 0,00075546 | 0,00075546 | ***          |
| genotype differences | 1   | FollowZone      | NA          | NA             | NA        | CumTime | +/-;M:KO    | WT          | 28 | 40 | -4,54930101 | 5,38E-06   | 3,77E-05   | ****         |
| genotype differences | 1   | FollowZone      | NA          | NA             | NA        | CumTime | +/-;M:WT    | WT          | 32 | 40 | -5,11454288 | 3,15E-07   | 2,52E-06   | ****         |
| genotype differences | 1   | FollowZone      | NA          | NA             | NA        | CumTime | Neo- Arc KO | Neo+ Arc KO | 13 | 13 | 2,4732533   | 0,01338892 | 0,04016676 | *            |
| genotype differences | 1   | FollowZone      | NA          | NA             | NA        | CumTime | Neo- Arc KO | WT          | 13 | 40 | 2,82680261  | 0,00470153 | 0,01880612 | *            |
| genotype differences | 2   | FollowZone      | NA          | NA             | NA        | CumTime | +/-;M:KO    | WT          | 27 | 42 | -5,54094468 | 3,01E-08   | 2,41E-07   | ****         |
| genotype differences | 2   | FollowZone      | NA          | NA             | NA        | CumTime | +/-;M:WT    | WT          | 32 | 42 | -4,06730064 | 4,76E-05   | 0,00033293 | ***          |
| genotype differences | 2   | FollowZone      | NA          | NA             | NA        | CumTime | Neo- Arc KO | Neo+ Arc KO | 20 | 12 | 3,22692273  | 0,00125129 | 0,00750775 | **           |
| genotype differences | 2   | FollowZone      | NA          | NA             | NA        | CumTime | Neo- Arc KO | WT          | 20 | 42 | 3,08918952  | 0,00200703 | 0,01003517 | *            |
| genotype differences | 3   | FollowZone      | NA          | NA             | NA        | CumTime | Neo- Arc KO | WT          | 20 | 24 | 2,33435734  | 0,01957702 | 0,01957702 | *            |
| genotype differences | 2   | Make contact    | NA          | NA             | NA        | CumTime | Neo- Arc KO | WT          | 31 | 30 | 2,87811198  | 0,00400063 | 0,00400063 | **           |
| genotype differences | 1   | Move in contact | NA          | NA             | NA        | CumTime | Neo- Arc KO | Neo+ Arc KO | 31 | 13 | -3,0075364  | 0,00263375 | 0,01476094 | **           |
| genotype differences | 2   | Move in contact | NA          | NA             | NA        | CumTime | Neo- Arc KO | Neo+ Arc KO | 31 | 12 | -3,2922358  | 0,00099394 | 0,0069576  | **           |
| genotype differences | 1   | Nose contact    | NA          | NA             | NA        | CumTime | Neo- Arc KO | Neo+ Arc KO | 31 | 13 | -3,9793848  | 6,9094E-05 | 0,00055275 | ***          |
| genotype differences | 2   | Nose contact    | NA          | NA             | NA        | CumTime | Neo- Arc KO | Neo+ Arc KO | 31 | 12 | -3,33236504 | 0,00086111 | 0,00602779 | **           |
| genotype differences | 1   | SAP             | NA          | NA             | NA        | CumTime | Neo- Arc KO | Neo+ Arc KO | 31 | 13 | 3,80682117  | 0,00014076 | 0,00140764 | **           |
| genotype differences | 1   | Social approach | NA          | NA             | NA        | CumTime | Neo- Arc KO | Neo+ Arc KO | 31 | 13 | -3,01852964 | 0,00254005 | 0,02032036 | *            |
| genotype differences | 2   | Social approach | NA          | NA             | NA        | CumTime | Neo- Arc KO | Neo+ Arc KO | 31 | 12 | -3,99891085 | 6,3635E-05 | 0,00044544 | ****         |
| genotype differences | 1   | Move in contact | NA          | NA             | NA        | CumTime | +/-;M:KO    | WT          | 28 | 49 | -2,73490228 | 0,00623988 | 0,02495952 | *            |
| genotype differences | 1   | Move in contact | NA          | NA             | NA        | CumTime | +/-;M:WT    | WT          | 32 | 49 | -3,16114171 | 0,00157152 | 0,01100064 | *            |
| genotype differences | 1   | Move in contact | NA          | NA             | NA        | CumTime | Neo+ Arc KO | WT          | 13 | 49 | 3,32848759  | 0,00087319 | 0,00698551 | **           |
| genotype differences | 2   | Move in contact | NA          | NA             | NA        | CumTime | Neo+ Arc KO | WT          | 12 | 48 | 3,93878405  | 8,19E-05   | 0,00073706 | ***          |
| genotype differences | 1   | Nose contact    | NA          | NA             | NA        | CumTime | Neo+ Arc KO | WT          | 13 | 49 | 2,95605662  | 0,003116   | 0,02181199 | *            |
| genotype differences | 2   | Nose contact    | NA          | NA             | NA        | CumTime | Neo+ Arc KO | WT          | 12 | 48 | 4,08736135  | 4,36E-05   | 0,00034905 | ***          |
| genotype differences | 1   | SAP             | NA          | NA             | NA        | CumTime | Neo+ Arc KO | WT          | 13 | 49 | -3,33078669 | 0,00086601 | 0,00779408 | **           |
| genotype differences | 3   | SAP             | NA          | NA             | NA        | CumTime | Neo- Arc KO | WT          | 31 | 30 | -4,09005676 | 4,31E-05   | 4,31E-05   | ****         |
| genotype differences | 2   | Social approach | NA          | NA             | NA        | CumTime | Neo+ Arc KO | WT          | 12 | 48 | 4,48034829  | 7,45E-06   | 7,45E-05   | ****         |
| genotype differences | 1   | Stop isolated   | NA          | NA             | NA        | CumTime | Neo+ Arc KO | WT          | 13 | 49 | -3,70058819 | 0,0002151  | 0,0017208  | **           |
| genotype differences | 2   | Stop isolated   | NA          | NA             | NA        | CumTime | Neo- Arc KO | WT          | 31 | 48 | -3,51908892 | 0,00043303 | 0,00259819 | **           |
| genotype differences | 2   | Stop isolated   | NA          | NA             | NA        | CumTime | Neo+ Arc KO | WT          | 12 | 48 | -4,47661794 | 7,58E-06   | 6,83E-05   | ****         |
| genotype differences | 1   | Cuddling        | WT          | NA             | NA        | CumTime | F           | M           | 15 | 15 | -4,12890526 | 3,64E-05   | 3,64E-05   | ****         |
| genotype differences | 2   | Cuddling        | Neo- Arc KO | NA             | NA        | CumTime | F           | M           | 15 | 16 | -3,12274919 | 0,0017917  | 0,0017917  | **           |
| genotype differences | 1   | Move in contact | Neo- Arc KO | NA             | NA        | CumTime | F           | M           | 15 | 16 | -1,97642354 | 0,04810683 | 0,04810683 | *            |
| genotype differences | 2   | Move in contact | +/-;M:KO    | NA             | NA        | CumTime | F           | M           | 15 | 12 | 2,29406554  | 0,02178673 | 0,02178673 | *            |
| genotype differences | 3   | Move in contact | Neo- Arc KO | NA             | NA        | CumTime | F           | M           | 15 | 16 | 2,76699295  | 0,0056576  | 0,0056576  | **           |
| genotype differences | 3   | Move in contact | WT          | NA             | NA        | CumTime | F           | M           | 15 | 15 | 2,42646697  | 0,01524664 | 0,01524664 | *            |
| genotype differences | 1   | Nose contact    | +/-;M:KO    | NA             | NA        | CumTime | F           | M           | 16 | 12 | -2,5533109  | 0,01067042 | 0,01067042 | *            |
| genotype differences | 1   | Nose contact    | WT          | NA             | NA        | CumTime | F           | M           | 28 | 26 | -2,45833016 | 0,01395848 | 0,01395848 | *            |
| genotype differences | 2   | Nose contact    | +/-;M:WT    | NA             | NA        | CumTime | F           | M           | 16 | 16 | 2,18595725  | 0,02881873 | 0,02881873 | *            |
| genotype differences | 1   | Social approach | WT          | NA             | NA        | CumTime | F           | M           | 28 | 26 | -2,40639361 | 0,0161109  | 0,0161109  | *            |
| genotype differences | 2   | Social approach | +/-;M:KO    | NA             | NA        | CumTime | F           | M           | 15 | 12 | 2,14698016  | 0,03179486 | 0,03179486 | *            |
| genotype differences | 2   | Social approach | +/-;M:WT    | NA             | NA        | CumTime | F           | M           | 16 | 16 | 3,16586912  | 0,0015462  | 0,0015462  | **           |
| genotype differences | 3   | Social approach | Neo- Arc KO | NA             | NA        | CumTime | F           | M           | 15 | 16 | 2,2926513   | 0,02186809 | 0,02186809 | *            |
| genotype differences | 1   | Social escape   | WT          | NA             | NA        | CumTime | F           | M           | 15 | 15 | -2,30203276 | 0,02133332 | 0,02133332 | *            |
| genotype differences | 3   | Social escape   | Neo- Arc KO | NA             | NA        | CumTime | F           | M           | 15 | 16 | 3,04369225  | 0,00233694 | 0,00233694 | **           |
| genotype differences | 2   | Stop isolated   | +/-;M:WT    | NA             | NA        | CumTime | F           | M           | 16 | 16 | -2,52515751 | 0,01156464 | 0,01156464 | *            |
| genotype differences | 3   | Stop isolated   | Neo- Arc KO | NA             | NA        | CumTime | F           | M           | 15 | 16 | -2,68793601 | 0,00718952 | 0,00718952 | **           |
| social enrichment    | 3   | FollowZone      | NA          | control        | NA        | CumTime | KO          | WT          | 17 | 33 | 3,26171818  | 0,00110739 | 0,00332218 | **           |
| social enrichment    | 1   | Make contact    | NA          | control        | NA        | CumTime | KO          | WT          | 34 | 48 | 3,76811159  | 0,00016449 | 0,00049346 | ***          |
| social enrichment    | 1   | Move in contact | NA          | control        | NA        | CumTime | KO          | WT          | 34 | 48 | 4,04144368  | 5,31E-05   | 0,00015937 | ***          |
| social enrichment    | 3   | Move in contact | NA          | control        | NA        | CumTime | KO          | WT          | 24 | 39 | 2,90855967  | 0,00363098 | 0,01089294 | *            |
| social enrichment    | 1   | Nose contact    | NA          | control        | NA        | CumTime | KO          | WT          | 34 | 48 | 4,49312691  | 7,02E-06   | 2,11E-05   | ****         |
| social enrichment    | 1   | Social approach | NA          | control        | NA        | CumTime | KO          | WT          | 34 | 48 | 5,15757326  | 2,50E-07   | 7,51E-07   | ****         |
| social enrichment    | 1   | Social escape   | NA          | control        | NA        | CumTime | KO          | WT          | 34 | 48 | 5,19733237  | 2,02E-07   | 6,07E-07   | ****         |
| social enrichment    | 3   | Social escape   | NA          | control        | NA        | CumTime | KO          | WT          | 24 | 39 | 3,33398204  | 0,00085612 | 0,00256837 | **           |
| social enrichment    | 1   | Stop isolated   | NA          | control        | NA        | CumTime | KO          | WT          | 34 | 48 | -6,00817392 | 1,88E-09   | 5,63E-09   | ****         |
| social enrichment    | 2   | Stop isolated   | NA          | control        | NA        | CumTime | KO          | WT          | 24 | 43 | -3,43575084 | 0,00059091 | 0,00177274 | **           |
| social enrichment    | 3   | Stop isolated   | NA          | control        | NA        | CumTime | KO          | WT          | 24 | 39 | -4,3487327  | 1,37E-05   | 4,11E-05   | ****         |
| social enrichment    | 1   | Cuddling        | KO          | NA             | NA        | CumTime | control     | enriched    | 32 | 13 | 4,11200046  | 3,92E-05   | 3,92E-05   | ****         |
| social enrichment    | 3   | FollowZone      | KO          | NA             | NA        | CumTime | control     | enriched    | 17 | 12 | 2,85786832  | 0,00426497 | 0,00426497 | **           |
| social enrichment    | 1   | Move in contact | KO          | NA             | NA        | CumTime | control     | enriched    | 34 | 13 | 4,16363601  | 3,13E-05   | 3,13E-05   | ****         |
| social enrichment    | 1   | Nose contact    | KO          | NA             | NA        | CumTime | control     | enriched    | 34 | 13 | 3,37820002  | 0,00072962 | 0,00072962 | **           |
| social enrichment    | 1   | Nose contact    | WT          | NA             | NA        | CumTime | control     | enriched    | 48 | 7  | 2,23544642  | 0,02538806 | 0,02538806 | *            |
| social enrichment    | 2   | SAP             | WT          | NA             | NA        | CumTime | control     | enriched    | 43 | 7  | 2,9779955   | 0,0029014  | 0,0029014  | **           |
| social enrichment    | 3   | SAP             | WT          | NA             | NA        | CumTime | control     | enriched    | 39 | 7  | 2,78352756  | 0,00537713 | 0,00537713 | **           |
| social enrichment    | 1   | Social approach | KO          | NA             | NA        | CumTime | control     | enriched    | 34 | 13 | 3,7849322   | 0,00072884 | 0,00072884 | ***          |
| social enrichment    | 1   | Social escape   | KO          | NA             | NA        | CumTime | control     | enriched    | 34 | 13 | 4,42496623  | 9,65E-06   | 9,65E-06   | ****         |
| OT treatment         | 1   | Cuddling        | NA          | NA             | SAL       | CumTime | KO          | WT          | 12 | 15 | 3,02529023  | 0,00248395 | 0,00248395 | **           |
| OT treatment         | 1   | Move in contact | NA          | NA             | OT20      | CumTime | KO          | WT          | 16 | 19 | 2,98040652  | 0,00287866 | 0,00287866 | **           |
| OT treatment         | 1   | Move in contact | NA          | NA             | SAL       | CumTime | KO          | WT          | 12 | 15 | 4,09878031  | 4,15E-05   | 4,15E-05   | ****         |
| OT treatment         | 1   | Nose contact    | NA          | NA             | OT20      | CumTime | KO          | WT          | 16 | 19 | 2,91417527  | 0,0035663  | 0,0035663  | **           |
| OT treatment         | 1   | Nose contact    | NA          | NA             | SAL       | CumTime | KO          | WT          | 12 | 15 | 3,31806025  | 0,00090645 | 0,00090645 | ***          |
| OT treatment         | 1   | Social approach | NA          | NA             | OT20      | CumTime | KO          | WT          | 16 | 19 | 2,78151795  | 0,00541053 | 0,00541053 | **           |
| OT treatment         | 1   | Social escape   | NA          | NA             | OT20      | CumTime | KO          | WT          | 16 | 19 | 2,81463126  | 0,00488332 | 0,00488332 | **           |
| OT treatment         | 1   | Stop isolated   | NA          | NA             | SAL       | CumTime | KO          | WT          | 12 | 15 | -3,51324026 | 0,00044268 | 0,00044268 | ***          |
| OT treatment         | 7   | Nose contact    | NA          | NA             | OT20      | CumTime | KO          | WT          | 16 | 19 | 2,84774457  | 0,00440302 | 0,00440302 | **           |
| OT treatment         | 7   | Nose contact    | NA          | NA             | SAL       | CumTime | KO          | WT          | 12 | 15 | 3,02575207  | 0,00248016 | 0,00248016 | **           |
| OT treatment         | 14  | Nose contact    | NA          | NA             | OT20      | CumTime | KO          | WT          | 16 | 19 | 3,16254248  | 0,00156398 | 0,00156398 | **           |
| OT treatment         | 14  | Rearing         | NA          | NA             | OT20      | CumTime | KO          | WT          | 16 | 19 | -3,52780284 | 0,00041902 | 0,00041902 | ***          |
| OT treatment         | 21  | Nose contact    | NA          | NA             | OT20      | CumTime | KO          | WT          | 16 | 19 | 3,26188936  | 0,00110672 | 0,00110672 | **           |
| OT treatment         | 21  | Periphery Zone  | NA          | NA             | OT20      | CumTime | KO          | WT          | 16 | 19 | 4,23850354  | 2,25E-05   | 2,25E-05   | ****         |
| OT treatment         | 28  | Periphery Zone  | NA          | NA             | OT20      | CumTime | KO          | WT          | 16 | 19 | 2,91397119  | 0,00356863 | 0,00356863 | **           |
| OT treatment         | 1   | Rearing         | WT          | NA             | NA        | CumTime | OT20        | SAL         | 19 | 15 | 2,01184883  | 0,04423587 | 0,04423587 | *            |
| OT treatment         | 1   | Social approach | KO          | NA             | NA        | CumTime | OT20        | SAL         | 16 | 12 | 2,08907255  | 0,03670119 | 0,03670119 | *            |
| OT treatment         | 7   | Social escape   | KO          | NA             | NA        | CumTime | OT20        | SAL         |    |    |             |            |            |              |

**Table S3. Mean and statistics of behavioral tests in pups**

| var_s3                   | pup_genotype | N  | mean       | sd         |
|--------------------------|--------------|----|------------|------------|
| duration_vocalization    | +/-          | 85 | 49,7351866 | 11,0361411 |
| duration_vocalization    | KO           | 63 | 40,9978991 | 6,75324454 |
| duration_vocalization    | WT           | 70 | 45,6495472 | 9,56964462 |
| latency_nest             | +/-          | 85 | 53,6951429 | 83,8325753 |
| latency_nest             | KO           | 63 | 67,6980526 | 80,5066531 |
| latency_nest             | WT           | 70 | 24,8395    | 56,7165856 |
| latency_vocalize         | +/-          | 85 | 1,69394118 | 3,51701427 |
| latency_vocalize         | KO           | 63 | 4,30123529 | 5,58921977 |
| latency_vocalize         | WT           | 70 | 1,32723913 | 1,56354929 |
| maxamp_mean              | +/-          | 85 | -65,637918 | 5,11542161 |
| maxamp_mean              | KO           | 63 | -66,758889 | 4,05861211 |
| maxamp_mean              | WT           | 70 | -68,857203 | 4,67345564 |
| maxfreq_mean             | +/-          | 85 | 65,125605  | 3,98962759 |
| maxfreq_mean             | KO           | 63 | 65,8766498 | 3,30332117 |
| maxfreq_mean             | WT           | 70 | 68,6352679 | 3,68774047 |
| meanDuration_nestEntries | +/-          | 85 | 15,1329429 | 28,4441598 |
| meanDuration_nestEntries | KO           | 63 | 12,1270526 | 17,5934688 |
| meanDuration_nestEntries | WT           | 70 | 26,9240714 | 29,0272326 |
| meanfreq_mean            | +/-          | 85 | 65,8608447 | 4,34175017 |
| meanfreq_mean            | KO           | 63 | 66,4667687 | 4,34813015 |
| meanfreq_mean            | WT           | 70 | 69,3788383 | 4,49763199 |
| number_immobile          | +/-          | 85 | 2,28571429 | 2,82396705 |
| number_immobile          | KO           | 63 | 0,84210526 | 1,21395396 |
| number_immobile          | WT           | 70 | 1,35714286 | 1,80973265 |
| number_nestEntries       | +/-          | 85 | 3,65714286 | 3,92535392 |
| number_nestEntries       | KO           | 63 | 3,10526316 | 3,3647641  |
| number_nestEntries       | WT           | 70 | 6,64285714 | 3,50887009 |
| number_vocalizations     | +/-          | 85 | 466,823529 | 247,774907 |
| number_vocalizations     | KO           | 63 | 272,058824 | 180,636538 |
| number_vocalizations     | WT           | 70 | 488,391304 | 187,979143 |
| totalTime_immobile       | +/-          | 85 | 36,6044857 | 48,8136556 |
| totalTime_immobile       | KO           | 63 | 11,3711579 | 20,680017  |
| totalTime_immobile       | WT           | 70 | 21,9346071 | 40,0280612 |
| totalTime_nestEntries    | +/-          | 85 | 64,2721429 | 86,3622889 |
| totalTime_nestEntries    | KO           | 63 | 60,7066842 | 87,8881921 |
| totalTime_nestEntries    | WT           | 70 | 162,275429 | 104,320138 |
| totalTime_vocalizing     | +/-          | 85 | 23930,6176 | 12516,2986 |
| totalTime_vocalizing     | KO           | 63 | 11669,8529 | 8965,10645 |
| totalTime_vocalizing     | WT           | 70 | 22876,3261 | 10440,8787 |

| var_s3                   | .y.      | group1 | group2 | n1 | n2 | statistic  | p          | p.adj      | p.adj.signif |
|--------------------------|----------|--------|--------|----|----|------------|------------|------------|--------------|
| duration_vocalization    | value_s3 | +/-    | KO     | 17 | 17 | -2,6864149 | 0,00722233 | 0,021667   | *            |
| latency_nest             | value_s3 | +/-    | WT     | 35 | 28 | -2,2677402 | 0,02334504 | 0,04669009 | *            |
| latency_nest             | value_s3 | KO     | WT     | 19 | 28 | -3,3828836 | 0,00071729 | 0,00215187 | **           |
| latency_vocalize         | value_s3 | +/-    | KO     | 17 | 17 | 2,77940619 | 0,00544584 | 0,01633751 | *            |
| maxfreq_mean             | value_s3 | +/-    | WT     | 17 | 23 | 2,416453   | 0,01567255 | 0,04701765 | *            |
| maxfreq_mean             | value_s3 | KO     | WT     | 17 | 23 | 2,416453   | 0,01567255 | 0,04701765 | *            |
| meanDuration_nestEntries | value_s3 | +/-    | WT     | 35 | 28 | 3,26575864 | 0,00109171 | 0,00327514 | **           |
| meanDuration_nestEntries | value_s3 | KO     | WT     | 19 | 28 | 2,70358978 | 0,00685949 | 0,01371898 | *            |
| meanfreq_mean            | value_s3 | +/-    | WT     | 17 | 23 | 2,41597125 | 0,0156933  | 0,0470799  | *            |
| number_nestEntries       | value_s3 | +/-    | WT     | 35 | 28 | 3,34618762 | 0,00081931 | 0,00245793 | **           |
| number_nestEntries       | value_s3 | KO     | WT     | 19 | 28 | 3,14020599 | 0,00168829 | 0,00337658 | **           |
| number_vocalizations     | value_s3 | +/-    | KO     | 17 | 17 | -2,3713162 | 0,01772486 | 0,03544972 | *            |
| number_vocalizations     | value_s3 | KO     | WT     | 17 | 23 | 3,07698074 | 0,00209109 | 0,00627326 | **           |
| totalTime_nestEntries    | value_s3 | +/-    | WT     | 35 | 28 | 3,78581036 | 0,00015321 | 0,00045963 | ***          |
| totalTime_nestEntries    | value_s3 | KO     | WT     | 19 | 28 | 3,32887904 | 0,00087196 | 0,00174393 | **           |
| totalTime_vocalizing     | value_s3 | +/-    | KO     | 17 | 17 | -2,9550564 | 0,00312612 | 0,00937836 | **           |
| totalTime_vocalizing     | value_s3 | KO     | WT     | 17 | 23 | 2,84761835 | 0,00440477 | 0,00937836 | **           |

**Table S4. Mean and statistics of western blot data in the PVN of naïve mice and HEK293 cells**

| var_s4       | plasmid  | condition | region | genotype | N  | n_females | n_males | mean       | sd         |
|--------------|----------|-----------|--------|----------|----|-----------|---------|------------|------------|
| ERK          | pUC19    | DMEM      | NA     | NA       | 10 | NA        | NA      | 11677,1343 | 5920,8986  |
| ERK          | pUC19    | SVF       | NA     | NA       | 10 | NA        | NA      | 8935,5725  | 4249,83131 |
| ERK          | pcDNA3.1 | DMEM      | NA     | NA       | 10 | NA        | NA      | 7977,4904  | 4935,46868 |
| ERK          | pcDNA3.1 | SVF       | NA     | NA       | 10 | NA        | NA      | 7107,1741  | 4324,5222  |
| ERK_to_GAPDH | pUC19    | DMEM      | NA     | NA       | 10 | NA        | NA      | 0,92864882 | 0,43109111 |
| ERK_to_GAPDH | pUC19    | SVF       | NA     | NA       | 10 | NA        | NA      | 0,75356517 | 0,26932804 |
| ERK_to_GAPDH | pcDNA3.1 | DMEM      | NA     | NA       | 10 | NA        | NA      | 0,70743437 | 0,44016379 |
| ERK_to_GAPDH | pcDNA3.1 | SVF       | NA     | NA       | 10 | NA        | NA      | 0,62443717 | 0,26269784 |
| GAPDH        | pUC19    | DMEM      | NA     | NA       | 18 | NA        | NA      | 12485,8947 | 2208,07502 |
| GAPDH        | pUC19    | SVF       | NA     | NA       | 18 | NA        | NA      | 11786,6873 | 2303,52084 |
| GAPDH        | pcDNA3.1 | DMEM      | NA     | NA       | 18 | NA        | NA      | 11453,5202 | 2469,76845 |
| GAPDH        | pcDNA3.1 | SVF       | NA     | NA       | 18 | NA        | NA      | 10533,2288 | 2514,73536 |
| S6           | pUC19    | DMEM      | NA     | NA       | 10 | NA        | NA      | 9768,8152  | 3690,46949 |
| S6           | pUC19    | SVF       | NA     | NA       | 10 | NA        | NA      | 12051,1651 | 4559,52957 |
| S6           | pcDNA3.1 | DMEM      | NA     | NA       | 10 | NA        | NA      | 10039,9013 | 3849,10892 |
| S6           | pcDNA3.1 | SVF       | NA     | NA       | 10 | NA        | NA      | 9834,1258  | 3001,55619 |
| S6_to_GAPDH  | pUC19    | DMEM      | NA     | NA       | 10 | NA        | NA      | 0,76413399 | 0,24477183 |
| S6_to_GAPDH  | pUC19    | SVF       | NA     | NA       | 10 | NA        | NA      | 0,99242539 | 0,39893185 |
| S6_to_GAPDH  | pcDNA3.1 | DMEM      | NA     | NA       | 10 | NA        | NA      | 0,86804233 | 0,38376373 |
| S6_to_GAPDH  | pcDNA3.1 | SVF       | NA     | NA       | 10 | NA        | NA      | 0,95057921 | 0,38441322 |
| pERK_to_ERK  | pUC19    | DMEM      | NA     | NA       | 10 | NA        | NA      | 0,45537314 | 0,2905289  |
| pERK_to_ERK  | pUC19    | SVF       | NA     | NA       | 10 | NA        | NA      | 0,59115968 | 0,4210605  |
| pERK_to_ERK  | pcDNA3.1 | DMEM      | NA     | NA       | 10 | NA        | NA      | 1,00345316 | 0,70494097 |
| pERK_to_ERK  | pcDNA3.1 | SVF       | NA     | NA       | 10 | NA        | NA      | 1,73747818 | 1,27849145 |
| pS6_to_S6    | pUC19    | DMEM      | NA     | NA       | 10 | NA        | NA      | 1,04827167 | 0,82999265 |
| pS6_to_S6    | pUC19    | SVF       | NA     | NA       | 10 | NA        | NA      | 1,81026144 | 1,12296576 |
| pS6_to_S6    | pcDNA3.1 | DMEM      | NA     | NA       | 10 | NA        | NA      | 1,14422676 | 1,05226876 |
| pS6_to_S6    | pcDNA3.1 | SVF       | NA     | NA       | 10 | NA        | NA      | 1,88235678 | 1,02702494 |
| phospho_ERK  | pUC19    | DMEM      | NA     | NA       | 10 | NA        | NA      | 4873,6277  | 3295,0332  |
| phospho_ERK  | pUC19    | SVF       | NA     | NA       | 10 | NA        | NA      | 4214,9116  | 1824,76088 |
| phospho_ERK  | pcDNA3.1 | DMEM      | NA     | NA       | 10 | NA        | NA      | 7157,6541  | 6235,0469  |
| phospho_ERK  | pcDNA3.1 | SVF       | NA     | NA       | 10 | NA        | NA      | 7688,0423  | 4031,93147 |
| phospho_S6   | pUC19    | DMEM      | NA     | NA       | 10 | NA        | NA      | 8318,4889  | 3415,60374 |
| phospho_S6   | pUC19    | SVF       | NA     | NA       | 10 | NA        | NA      | 17998,8278 | 2790,48605 |
| phospho_S6   | pcDNA3.1 | DMEM      | NA     | NA       | 10 | NA        | NA      | 9039,2244  | 4746,66104 |
| phospho_S6   | pcDNA3.1 | SVF       | NA     | NA       | 10 | NA        | NA      | 16034,7297 | 3086,84985 |
| ERK          | NA       | NA        | OB     | Neo+ KO1 | 3  | 0         | 3       | 63,2130112 | 3,06494794 |
| ERK          | NA       | NA        | OB     | Neo- KO1 | 3  | 0         | 3       | 59,3175418 | 3,39147775 |
| ERK          | NA       | NA        | OB     | WT       | 3  | 0         | 3       | 53,4841826 | 36,1000162 |
| ERK          | NA       | NA        | PVN    | Neo+ KO1 | 36 | 16        | 20      | 8472,82009 | 8625,51157 |
| ERK          | NA       | NA        | PVN    | Neo- KO1 | 18 | 12        | 6       | 8535,29889 | 8781,25579 |
| ERK          | NA       | NA        | PVN    | WT       | 78 | 30        | 40      | 8473,64791 | 9390,74186 |
| ERK_to_GAPDH | NA       | NA        | PVN    | Neo+ KO1 | 18 | 8         | 10      | 1,06192304 | 0,13155955 |
| ERK_to_GAPDH | NA       | NA        | PVN    | Neo- KO1 | 9  | 6         | 3       | 1,10033605 | 0,18462687 |
| ERK_to_GAPDH | NA       | NA        | PVN    | WT       | 36 | 15        | 20      | 1,23764766 | 0,23225308 |
| GAPDH        | NA       | NA        | OB     | Neo+ KO1 | 3  | 0         | 3       | 17065,985  | 1625,64139 |
| GAPDH        | NA       | NA        | OB     | Neo- KO1 | 3  | 0         | 3       | 16522,4833 | 1341,45814 |
| GAPDH        | NA       | NA        | OB     | WT       | 3  | 0         | 3       | 10798,7987 | 1854,45529 |
| GAPDH        | NA       | NA        | PVN    | Neo+ KO1 | 36 | 16        | 20      | 15945,0775 | 1475,14826 |
| GAPDH        | NA       | NA        | PVN    | Neo- KO1 | 18 | 12        | 6       | 15680,9561 | 1959,6468  |
| GAPDH        | NA       | NA        | PVN    | WT       | 78 | 30        | 40      | 14862,5168 | 2311,68727 |
| pERK_to_ERK  | NA       | NA        | OB     | Neo+ KO1 | 3  | 0         | 3       | 91,9934207 | 39,2676313 |
| pERK_to_ERK  | NA       | NA        | OB     | Neo- KO1 | 3  | 0         | 3       | 61,9008749 | 31,079162  |
| pERK_to_ERK  | NA       | NA        | OB     | WT       | 3  | 0         | 3       | 78,8949267 | 62,8484406 |
| pERK_to_ERK  | NA       | NA        | PVN    | Neo+ KO1 | 36 | 16        | 20      | 61,7232476 | 78,5546957 |
| pERK_to_ERK  | NA       | NA        | PVN    | Neo- KO1 | 18 | 12        | 6       | 42,2116689 | 48,1636843 |
| pERK_to_ERK  | NA       | NA        | PVN    | WT       | 78 | 30        | 40      | 58,0835682 | 69,1633694 |
| phospho_ERK  | NA       | NA        | OB     | Neo+ KO1 | 3  | 0         | 3       | 57,7184843 | 23,0036762 |
| phospho_ERK  | NA       | NA        | OB     | Neo- KO1 | 3  | 0         | 3       | 36,754669  | 18,7375192 |
| phospho_ERK  | NA       | NA        | OB     | WT       | 3  | 0         | 3       | 27,2628956 | 6,87156211 |
| phospho_ERK  | NA       | NA        | PVN    | Neo+ KO1 | 36 | 16        | 20      | 4913,60635 | 5634,88683 |
| phospho_ERK  | NA       | NA        | PVN    | Neo- KO1 | 18 | 12        | 6       | 3759,39269 | 4255,29497 |
| phospho_ERK  | NA       | NA        | PVN    | WT       | 78 | 30        | 40      | 3930,16758 | 4828,95502 |

| condition | plasmid  | brain_region | sex | var_s4_stat            | .y.           | group1   | group2   | n1 | n2 | statistic    | p          | p.adj      | p.adj.signif |
|-----------|----------|--------------|-----|------------------------|---------------|----------|----------|----|----|--------------|------------|------------|--------------|
| DMEM      | NA       | NA           | NA  | pERK_to_ERK_normalized | value_s5_stat | pcDNA3.1 | pUC19    | 5  | 5  | -2,785430073 | 0,00534568 | 0,00534568 | **           |
| NA        | pUC19    | NA           | NA  | pS6_to_S6_normalized   | value_s5_stat | DMEM     | SVF      | 5  | 5  | 2,785430073  | 0,00534568 | 0,00534568 | **           |
| NA        | pcDNA3.1 | NA           | NA  | pS6_to_S6_normalized   | value_s5_stat | DMEM     | SVF      | 5  | 5  | 1,984485278  | 0,04720177 | 0,04720177 | *            |
| NA        | pUC19    | NA           | NA  | phospho_S6             | value_s5_stat | DMEM     | SVF      | 5  | 5  | 2,611164839  | 0,00902344 | 0,00902344 | **           |
| NA        | pcDNA3.1 | NA           | NA  | phospho_S6             | value_s5_stat | DMEM     | SVF      | 5  | 5  | 2,193378465  | 0,02828012 | 0,02828012 | *            |
| NA        | NA       | PVN          | F   | pERK_ERK_normalized    | value_s5_stat | Neo- KO1 | Neo+ KO1 | 6  | 8  | 2,201398     | 0,02770785 | NA         | *            |
| NA        | NA       | PVN          | F   | pERK_ERK_normalized    | value_s5_stat | Neo+ KO1 | WT       | 8  | 11 | -2,09342     | 0,03631168 | NA         | *            |
| NA        | NA       | PVN          | NA  | pERK_ERK_normalized    | value_s5_stat | F        | M        | 8  | 13 | -2,824407    | 0,00473683 | 0,00473683 | **           |

**Table S5. Mean and statistics of qPCR data in dams and naïve mice**

| var_s5  | structure | condition | genotype   | N  | n_females | n_males | mean       | sd         |
|---------|-----------|-----------|------------|----|-----------|---------|------------|------------|
| Avp     | CPU       | dams      | Neo+Arc KO | 6  | 6         | 0       | -11,399553 | 0,92875372 |
| Avp     | CPU       | dams      | Neo-Arc KO | 7  | 7         | 0       | -9,0394481 | 1,20227005 |
| Avp     | CPU       | dams      | WT         | 9  | 9         | 0       | -8,9034691 | 0,86082377 |
| Avp     | CPU       | naive     | Neo+Arc KO | 14 | 8         | 6       | -10,258764 | 1,36608629 |
| Avp     | CPU       | naive     | WT         | 13 | 8         | 5       | -10,899407 | 1,43984174 |
| Avp     | NAC       | dams      | Neo+Arc KO | 4  | 4         | 0       | -9,7519224 | 0,68666996 |
| Avp     | NAC       | dams      | Neo-Arc KO | 8  | 8         | 0       | -9,4340321 | 0,90986339 |
| Avp     | NAC       | dams      | WT         | 10 | 10        | 0       | -9,5109452 | 0,82115445 |
| Avp     | NAC       | naive     | Neo+Arc KO | 13 | 7         | 6       | -10,474201 | 0,8618336  |
| Avp     | NAC       | naive     | WT         | 13 | 8         | 5       | -9,7247441 | 0,46025262 |
| Avp     | PFC       | dams      | Neo+Arc KO | 5  | 5         | 0       | -10,571044 | 1,5918167  |
| Avp     | PFC       | dams      | Neo-Arc KO | 8  | 8         | 0       | -8,5099134 | 0,4673804  |
| Avp     | PFC       | dams      | WT         | 9  | 9         | 0       | -8,9958074 | 0,94226404 |
| Avp     | PFC       | naive     | Neo+Arc KO | 13 | 7         | 6       | -9,7000827 | 1,61147124 |
| Avp     | PFC       | naive     | WT         | 10 | 5         | 5       | -10,302218 | 0,84905452 |
| Avp     | PVN       | dams      | Neo+Arc KO | 6  | 6         | 0       | -4,4726075 | 1,43903245 |
| Avp     | PVN       | dams      | Neo-Arc KO | 6  | 6         | 0       | -3,4030169 | 0,90463363 |
| Avp     | PVN       | dams      | WT         | 8  | 8         | 0       | -5,1197579 | 2,20771139 |
| Avp     | PVN       | naive     | Neo+Arc KO | 14 | 8         | 6       | -4,2113028 | 1,8566728  |
| Avp     | PVN       | naive     | WT         | 13 | 8         | 5       | -3,9387352 | 2,97789574 |
| Avp     | SON       | dams      | Neo+Arc KO | 6  | 6         | 0       | -2,5846835 | 2,20741916 |
| Avp     | SON       | dams      | Neo-Arc KO | 8  | 8         | 0       | -3,5192006 | 3,08660813 |
| Avp     | SON       | dams      | WT         | 8  | 8         | 0       | -4,6814528 | 2,32726397 |
| Avp     | SON       | naive     | Neo+Arc KO | 13 | 7         | 6       | -4,4457196 | 2,60010185 |
| Avp     | SON       | naive     | WT         | 13 | 8         | 5       | -5,2528746 | 4,04824411 |
| Avpr1a  | CPU       | dams      | Neo+Arc KO | 5  | 5         | 0       | -9,8660451 | 1,89471052 |
| Avpr1a  | CPU       | dams      | Neo-Arc KO | 7  | 7         | 0       | -11,829204 | 0,86305708 |
| Avpr1a  | CPU       | dams      | WT         | 8  | 8         | 0       | -10,798241 | 1,52553108 |
| Avpr1a  | CPU       | naive     | Neo+Arc KO | 14 | 8         | 6       | -10,346802 | 1,82711381 |
| Avpr1a  | CPU       | naive     | WT         | 13 | 8         | 5       | -11,110091 | 2,15309044 |
| Avpr1a  | NAC       | dams      | Neo+Arc KO | 5  | 5         | 0       | -8,4901416 | 0,79911512 |
| Avpr1a  | NAC       | dams      | Neo-Arc KO | 7  | 7         | 0       | -11,767914 | 1,32073721 |
| Avpr1a  | NAC       | dams      | WT         | 10 | 10        | 0       | -10,23165  | 1,78533384 |
| Avpr1a  | NAC       | naive     | Neo+Arc KO | 13 | 7         | 6       | -10,723388 | 1,77394007 |
| Avpr1a  | NAC       | naive     | WT         | 13 | 8         | 5       | -10,672737 | 2,23836224 |
| Avpr1a  | PFC       | dams      | Neo+Arc KO | 5  | 5         | 0       | -12,526886 | 0,24016134 |
| Avpr1a  | PFC       | dams      | Neo-Arc KO | 8  | 8         | 0       | -12,12388  | 0,5239606  |
| Avpr1a  | PFC       | dams      | WT         | 8  | 8         | 0       | -12,58299  | 0,50004029 |
| Avpr1a  | PFC       | naive     | Neo+Arc KO | 13 | 7         | 6       | -8,2440993 | 2,95457489 |
| Avpr1a  | PFC       | naive     | WT         | 10 | 5         | 5       | -9,4660235 | 2,19865775 |
| Avpr1a  | PVN       | dams      | Neo+Arc KO | 6  | 6         | 0       | -11,033641 | 0,78112633 |
| Avpr1a  | PVN       | dams      | Neo-Arc KO | 7  | 7         | 0       | -8,7762219 | 0,39215041 |
| Avpr1a  | PVN       | dams      | WT         | 8  | 8         | 0       | -9,7865295 | 1,15946836 |
| Avpr1a  | PVN       | naive     | Neo+Arc KO | 14 | 8         | 6       | -3,9422718 | 2,93727426 |
| Avpr1a  | PVN       | naive     | WT         | 13 | 8         | 5       | -5,740932  | 1,57805492 |
| Avpr1a  | SON       | dams      | Neo+Arc KO | 6  | 6         | 0       | -12,109911 | 0,3069019  |
| Avpr1a  | SON       | dams      | Neo-Arc KO | 8  | 8         | 0       | -10,080011 | 0,52352728 |
| Avpr1a  | SON       | dams      | WT         | 8  | 8         | 0       | -10,587507 | 1,65802352 |
| Avpr1a  | SON       | naive     | Neo+Arc KO | 13 | 7         | 6       | -5,9299838 | 3,04359541 |
| Avpr1a  | SON       | naive     | WT         | 13 | 8         | 5       | -6,5977339 | 3,57851112 |
| Cartpt  | NAC       | dams      | Neo+Arc KO | 5  | 5         | 0       | -3,9456513 | 0,50290061 |
| Cartpt  | NAC       | dams      | Neo-Arc KO | 8  | 8         | 0       | -4,1291712 | 0,23913007 |
| Cartpt  | NAC       | dams      | WT         | 10 | 10        | 0       | -4,1259405 | 0,42376932 |
| Cartpt  | NAC       | naive     | Neo+Arc KO | 13 | 7         | 6       | -4,1873948 | 0,54766675 |
| Cartpt  | NAC       | naive     | WT         | 13 | 8         | 5       | -3,9744621 | 0,57500383 |
| Cartpt  | PVN       | dams      | Neo+Arc KO | 5  | 5         | 0       | -5,3926199 | 0,7393825  |
| Cartpt  | PVN       | dams      | Neo-Arc KO | 7  | 7         | 0       | -4,4593211 | 0,94876736 |
| Cartpt  | PVN       | dams      | WT         | 8  | 8         | 0       | -4,6880818 | 0,77309241 |
| Cartpt  | PVN       | naive     | Neo+Arc KO | 14 | 8         | 6       | -4,9350334 | 1,47848739 |
| Cartpt  | PVN       | naive     | WT         | 13 | 8         | 5       | -4,9381295 | 0,72236277 |
| Cartpt  | SON       | dams      | Neo+Arc KO | 6  | 6         | 0       | -6,2958651 | 0,28049339 |
| Cartpt  | SON       | dams      | Neo-Arc KO | 7  | 7         | 0       | -6,5882363 | 0,32816614 |
| Cartpt  | SON       | dams      | WT         | 8  | 8         | 0       | -6,2594571 | 0,24711411 |
| Cartpt  | SON       | naive     | Neo+Arc KO | 13 | 7         | 6       | -5,8874308 | 0,66532185 |
| Cartpt  | SON       | naive     | WT         | 13 | 8         | 5       | -6,3789545 | 0,52893831 |
| Cck     | PFC       | dams      | Neo+Arc KO | 6  | 6         | 0       | -2,7250749 | 0,34316547 |
| Cck     | PFC       | dams      | Neo-Arc KO | 7  | 7         | 0       | -3,1125509 | 0,13657823 |
| Cck     | PFC       | dams      | WT         | 8  | 8         | 0       | -2,9986384 | 0,32265755 |
| Cck     | PFC       | naive     | Neo+Arc KO | 12 | 6         | 6       | -1,7914484 | 1,38878805 |
| Cck     | PFC       | naive     | WT         | 10 | 5         | 5       | -2,6448085 | 0,52151789 |
| Cck     | PVN       | dams      | Neo+Arc KO | 5  | 5         | 0       | -4,5985736 | 0,49134979 |
| Cck     | PVN       | dams      | Neo-Arc KO | 7  | 7         | 0       | -6,3547249 | 0,42762752 |
| Cck     | PVN       | dams      | WT         | 8  | 8         | 0       | -6,0955667 | 0,92891153 |
| Cck     | PVN       | naive     | Neo+Arc KO | 14 | 8         | 6       | -4,8307286 | 1,39724416 |
| Cck     | PVN       | naive     | WT         | 13 | 8         | 5       | -5,4972933 | 0,57526513 |
| Cck     | SON       | dams      | Neo+Arc KO | 6  | 6         | 0       | -4,3389436 | 0,44700009 |
| Cck     | SON       | dams      | Neo-Arc KO | 8  | 8         | 0       | -3,307162  | 0,4045821  |
| Cck     | SON       | dams      | WT         | 7  | 7         | 0       | -4,073647  | 0,75394824 |
| Cck     | SON       | naive     | Neo+Arc KO | 13 | 7         | 6       | -4,5692355 | 1,45524029 |
| Cck     | SON       | naive     | WT         | 13 | 8         | 5       | -4,7705164 | 1,21302555 |
| Cntnap2 | CPU       | dams      | Neo+Arc KO | 6  | 6         | 0       | -6,4504975 | 0,6165757  |
| Cntnap2 | CPU       | dams      | Neo-Arc KO | 7  | 7         | 0       | -6,5167529 | 0,32803721 |
| Cntnap2 | CPU       | dams      | WT         | 8  | 8         | 0       | -6,4815994 | 0,48914543 |
| Cntnap2 | CPU       | naive     | Neo+Arc KO | 14 | 8         | 6       | -5,4443099 | 0,53147481 |
| Cntnap2 | CPU       | naive     | WT         | 13 | 8         | 5       | -5,6508667 | 0,46278877 |
| Cntnap2 | NAC       | dams      | Neo+Arc KO | 5  | 5         | 0       | -5,0744524 | 0,65969718 |
| Cntnap2 | NAC       | dams      | Neo-Arc KO | 7  | 7         | 0       | -5,9141532 | 0,24754277 |
| Cntnap2 | NAC       | dams      | WT         | 9  | 9         | 0       | -5,8353645 | 0,60024635 |
| Cntnap2 | NAC       | naive     | Neo+Arc KO | 13 | 7         | 6       | -5,2298469 | 0,61802584 |

|         |     |       |            |    |    |   |            |            |
|---------|-----|-------|------------|----|----|---|------------|------------|
| Cntnap2 | NAC | naive | WT         | 13 | 8  | 5 | -5,709286  | 0,49444816 |
| Cntnap2 | PFC | dams  | Neo+Arc KO | 5  | 5  | 0 | -7,1163131 | 0,39626381 |
| Cntnap2 | PFC | dams  | Neo-Arc KO | 7  | 7  | 0 | -7,0430637 | 0,16671974 |
| Cntnap2 | PFC | dams  | WT         | 9  | 9  | 0 | -7,2199352 | 0,16188082 |
| Cntnap2 | PFC | naive | Neo+Arc KO | 13 | 7  | 6 | -5,98803   | 1,04303152 |
| Cntnap2 | PFC | naive | WT         | 10 | 5  | 5 | -6,6673656 | 0,33032864 |
| Cntnap2 | PVN | dams  | Neo+Arc KO | 6  | 6  | 0 | -6,1010666 | 0,21842681 |
| Cntnap2 | PVN | dams  | Neo-Arc KO | 7  | 7  | 0 | -5,2883775 | 0,19613384 |
| Cntnap2 | PVN | dams  | WT         | 8  | 8  | 0 | -5,8946143 | 0,43292432 |
| Cntnap2 | PVN | naive | Neo+Arc KO | 14 | 8  | 6 | -3,5642416 | 1,80414061 |
| Cntnap2 | PVN | naive | WT         | 13 | 8  | 5 | -3,8355144 | 1,49346237 |
| Cntnap2 | SON | dams  | Neo+Arc KO | 6  | 6  | 0 | -6,1395078 | 0,08853755 |
| Cntnap2 | SON | dams  | Neo-Arc KO | 8  | 8  | 0 | -5,9788715 | 0,27122194 |
| Cntnap2 | SON | dams  | WT         | 7  | 7  | 0 | -5,9853309 | 0,20532104 |
| Cntnap2 | SON | naive | Neo+Arc KO | 13 | 7  | 6 | -4,3950272 | 1,79383722 |
| Cntnap2 | SON | naive | WT         | 13 | 8  | 5 | -5,1228294 | 0,56566659 |
| Cpeb4   | CPU | dams  | Neo+Arc KO | 6  | 6  | 0 | -5,1023182 | 0,65474243 |
| Cpeb4   | CPU | dams  | Neo-Arc KO | 7  | 7  | 0 | -5,1040101 | 0,17659617 |
| Cpeb4   | CPU | dams  | WT         | 8  | 8  | 0 | -5,0564996 | 0,23644236 |
| Cpeb4   | CPU | naive | Neo+Arc KO | 14 | 8  | 6 | -4,9718149 | 0,37709556 |
| Cpeb4   | CPU | naive | WT         | 13 | 8  | 5 | -4,9294573 | 0,21496826 |
| Cpeb4   | NAC | dams  | Neo+Arc KO | 5  | 5  | 0 | -4,7374265 | 0,27720987 |
| Cpeb4   | NAC | dams  | Neo-Arc KO | 8  | 8  | 0 | -4,8617058 | 0,17925564 |
| Cpeb4   | NAC | dams  | WT         | 10 | 10 | 0 | -4,8773062 | 0,22749098 |
| Cpeb4   | NAC | naive | Neo+Arc KO | 13 | 7  | 6 | -4,5642123 | 0,6352815  |
| Cpeb4   | NAC | naive | WT         | 13 | 8  | 5 | -4,9834594 | 0,18035351 |
| Cpeb4   | PFC | dams  | Neo+Arc KO | 6  | 6  | 0 | -4,9178812 | 0,12011156 |
| Cpeb4   | PFC | dams  | Neo-Arc KO | 6  | 6  | 0 | -4,9438764 | 0,07719273 |
| Cpeb4   | PFC | dams  | WT         | 8  | 8  | 0 | -4,9864291 | 0,07318755 |
| Cpeb4   | PFC | naive | Neo+Arc KO | 13 | 7  | 6 | -5,114812  | 0,27279561 |
| Cpeb4   | PFC | naive | WT         | 10 | 5  | 5 | -5,0626483 | 0,21114229 |
| Cpeb4   | PVN | dams  | Neo+Arc KO | 6  | 6  | 0 | -5,1066706 | 0,13049564 |
| Cpeb4   | PVN | dams  | Neo-Arc KO | 7  | 7  | 0 | -4,6987785 | 0,07641059 |
| Cpeb4   | PVN | dams  | WT         | 8  | 8  | 0 | -5,0553821 | 0,2074659  |
| Cpeb4   | PVN | naive | Neo+Arc KO | 14 | 8  | 6 | -5,0569328 | 1,35022088 |
| Cpeb4   | PVN | naive | WT         | 13 | 8  | 5 | -4,745126  | 1,03187263 |
| Cpeb4   | SON | dams  | Neo+Arc KO | 5  | 5  | 0 | -5,2594726 | 0,16121716 |
| Cpeb4   | SON | dams  | Neo-Arc KO | 8  | 8  | 0 | -4,8515583 | 0,17191947 |
| Cpeb4   | SON | dams  | WT         | 8  | 8  | 0 | -5,1480427 | 0,31234606 |
| Cpeb4   | SON | naive | Neo+Arc KO | 13 | 7  | 6 | -5,1554995 | 0,77060688 |
| Cpeb4   | SON | naive | WT         | 13 | 8  | 5 | -5,6707375 | 0,52903766 |
| Egr1    | CPU | dams  | Neo+Arc KO | 6  | 6  | 0 | -3,0705993 | 0,69153582 |
| Egr1    | CPU | dams  | Neo-Arc KO | 7  | 7  | 0 | -3,5526452 | 0,52711062 |
| Egr1    | CPU | dams  | WT         | 9  | 9  | 0 | -3,3799588 | 0,79448439 |
| Egr1    | CPU | naive | Neo+Arc KO | 14 | 8  | 6 | -1,5759107 | 0,46939155 |
| Egr1    | CPU | naive | WT         | 13 | 8  | 5 | -1,8023537 | 0,73682102 |
| Egr1    | NAC | dams  | Neo+Arc KO | 6  | 6  | 0 | -3,8802447 | 0,6729407  |
| Egr1    | NAC | dams  | Neo-Arc KO | 8  | 8  | 0 | -4,7561415 | 0,55764483 |
| Egr1    | NAC | dams  | WT         | 10 | 10 | 0 | -4,5078883 | 0,89182819 |
| Egr1    | NAC | naive | Neo+Arc KO | 13 | 7  | 6 | -2,8819772 | 0,52269854 |
| Egr1    | NAC | naive | WT         | 13 | 8  | 5 | -3,3636896 | 0,58212299 |
| Egr1    | PFC | dams  | Neo+Arc KO | 6  | 6  | 0 | -4,0704252 | 0,6665758  |
| Egr1    | PFC | dams  | Neo-Arc KO | 8  | 8  | 0 | -5,1134951 | 0,65034374 |
| Egr1    | PFC | dams  | WT         | 9  | 9  | 0 | -4,6139142 | 0,6683017  |
| Egr1    | PFC | naive | Neo+Arc KO | 13 | 7  | 6 | -2,2154777 | 0,72330883 |
| Egr1    | PFC | naive | WT         | 10 | 5  | 5 | -2,9181943 | 0,69160821 |
| Esr1    | CPU | dams  | Neo+Arc KO | 5  | 5  | 0 | -10,725792 | 2,88029368 |
| Esr1    | CPU | dams  | Neo-Arc KO | 7  | 7  | 0 | -13,138674 | 0,94072594 |
| Esr1    | CPU | dams  | WT         | 9  | 9  | 0 | -12,332073 | 1,55881858 |
| Esr1    | CPU | naive | Neo+Arc KO | 14 | 8  | 6 | -10,256074 | 2,83750125 |
| Esr1    | CPU | naive | WT         | 13 | 8  | 5 | -11,254926 | 1,60938387 |
| Esr1    | NAC | dams  | Neo+Arc KO | 5  | 5  | 0 | -12,657055 | 0,52577796 |
| Esr1    | NAC | dams  | Neo-Arc KO | 8  | 8  | 0 | -12,037101 | 0,7092539  |
| Esr1    | NAC | dams  | WT         | 10 | 10 | 0 | -11,824294 | 0,71530351 |
| Esr1    | NAC | naive | Neo+Arc KO | 13 | 7  | 6 | -12,250225 | 0,94116786 |
| Esr1    | NAC | naive | WT         | 13 | 8  | 5 | -12,29794  | 0,8219893  |
| Esr1    | PVN | dams  | Neo+Arc KO | 5  | 5  | 0 | -8,1308618 | 0,62630639 |
| Esr1    | PVN | dams  | Neo-Arc KO | 7  | 7  | 0 | -5,5919573 | 0,61115853 |
| Esr1    | PVN | dams  | WT         | 8  | 8  | 0 | -6,8431672 | 1,81128443 |
| Esr1    | PVN | naive | Neo+Arc KO | 14 | 8  | 6 | -5,8211832 | 1,18695634 |
| Esr1    | PVN | naive | WT         | 13 | 8  | 5 | -6,6548729 | 0,80680811 |
| Esr1    | SON | dams  | Neo+Arc KO | 6  | 6  | 0 | -10,060195 | 0,26772709 |
| Esr1    | SON | dams  | Neo-Arc KO | 8  | 8  | 0 | -9,2813625 | 0,62078833 |
| Esr1    | SON | dams  | WT         | 8  | 8  | 0 | -9,7459692 | 0,75766004 |
| Esr1    | SON | naive | Neo+Arc KO | 12 | 7  | 5 | -9,0805565 | 1,49326452 |
| Esr1    | SON | naive | WT         | 13 | 8  | 5 | -9,2743034 | 1,20328214 |
| Fmr1    | CPU | dams  | Neo+Arc KO | 5  | 5  | 0 | -6,4207325 | 0,25091976 |
| Fmr1    | CPU | dams  | Neo-Arc KO | 7  | 7  | 0 | -6,7221909 | 0,14382811 |
| Fmr1    | CPU | dams  | WT         | 8  | 8  | 0 | -6,4671115 | 0,25176027 |
| Fmr1    | CPU | naive | Neo+Arc KO | 14 | 8  | 6 | -5,9833001 | 0,40080097 |
| Fmr1    | CPU | naive | WT         | 13 | 8  | 5 | -6,03366   | 0,42366141 |
| Fmr1    | NAC | dams  | Neo+Arc KO | 6  | 6  | 0 | -7,0106411 | 0,38822623 |
| Fmr1    | NAC | dams  | Neo-Arc KO | 7  | 7  | 0 | -6,9027136 | 0,28821277 |
| Fmr1    | NAC | dams  | WT         | 10 | 10 | 0 | -6,9108479 | 0,31951087 |
| Fmr1    | NAC | naive | Neo+Arc KO | 13 | 7  | 6 | -6,7182064 | 0,22572014 |
| Fmr1    | NAC | naive | WT         | 13 | 8  | 5 | -6,9190881 | 0,2684046  |
| Fmr1    | PFC | dams  | Neo+Arc KO | 6  | 6  | 0 | -6,4918114 | 0,30516213 |
| Fmr1    | PFC | dams  | Neo-Arc KO | 8  | 8  | 0 | -6,6232172 | 0,19106453 |
| Fmr1    | PFC | dams  | WT         | 9  | 9  | 0 | -6,5283729 | 0,20331304 |
| Fmr1    | PFC | naive | Neo+Arc KO | 13 | 7  | 6 | -6,3814362 | 0,31532783 |

|         |     |       |             |    |    |   |            |            |
|---------|-----|-------|-------------|----|----|---|------------|------------|
| Fmr1    | PFC | naive | WT          | 10 | 5  | 5 | -6,5311196 | 0,34832414 |
| Fmr1    | PVN | dams  | Neo+ Arc KO | 6  | 6  | 0 | -6,8038605 | 0,14830837 |
| Fmr1    | PVN | dams  | Neo- Arc KO | 7  | 7  | 0 | -6,7584082 | 0,12411237 |
| Fmr1    | PVN | dams  | WT          | 7  | 7  | 0 | -6,8576885 | 0,09373914 |
| Fmr1    | PVN | naive | Neo+ Arc KO | 14 | 8  | 6 | -6,3338334 | 0,82106095 |
| Fmr1    | PVN | naive | WT          | 13 | 8  | 5 | -6,3836881 | 0,6342381  |
| Fmr1    | SON | dams  | Neo+ Arc KO | 5  | 5  | 0 | -6,7873707 | 0,13928162 |
| Fmr1    | SON | dams  | Neo- Arc KO | 8  | 8  | 0 | -6,4811014 | 0,22366668 |
| Fmr1    | SON | dams  | WT          | 7  | 7  | 0 | -6,6417359 | 0,23192675 |
| Fmr1    | SON | naive | Neo+ Arc KO | 13 | 7  | 6 | -6,4813324 | 0,72410518 |
| Fmr1    | SON | naive | WT          | 13 | 8  | 5 | -6,6157945 | 0,73872307 |
| Fos     | CPU | dams  | Neo+ Arc KO | 6  | 6  | 0 | -8,4052796 | 0,9826842  |
| Fos     | CPU | dams  | Neo- Arc KO | 7  | 7  | 0 | -8,997282  | 0,91352986 |
| Fos     | CPU | dams  | WT          | 9  | 9  | 0 | -9,2753357 | 1,29824777 |
| Fos     | CPU | naive | Neo+ Arc KO | 14 | 8  | 6 | -7,0464454 | 1,021191   |
| Fos     | CPU | naive | WT          | 13 | 8  | 5 | -7,3131544 | 1,39387235 |
| Fos     | NAC | dams  | Neo+ Arc KO | 6  | 6  | 0 | -8,5281479 | 0,471479   |
| Fos     | NAC | dams  | Neo- Arc KO | 8  | 8  | 0 | -9,9348152 | 0,89268566 |
| Fos     | NAC | dams  | WT          | 10 | 10 | 0 | -9,9704889 | 1,02952305 |
| Fos     | NAC | naive | Neo+ Arc KO | 13 | 7  | 6 | -7,4304126 | 0,59137025 |
| Fos     | NAC | naive | WT          | 13 | 8  | 5 | -7,7517079 | 0,54488165 |
| Fos     | PFC | dams  | Neo+ Arc KO | 6  | 6  | 0 | -8,4013704 | 0,55996607 |
| Fos     | PFC | dams  | Neo- Arc KO | 8  | 8  | 0 | -8,3835142 | 0,57212597 |
| Fos     | PFC | dams  | WT          | 9  | 9  | 0 | -8,6765164 | 0,60469139 |
| Fos     | PFC | naive | Neo+ Arc KO | 13 | 7  | 6 | -5,5960067 | 1,21929457 |
| Fos     | PFC | naive | WT          | 10 | 5  | 5 | -6,7858727 | 1,00392409 |
| Fos     | PVN | dams  | Neo+ Arc KO | 6  | 6  | 0 | -8,5720713 | 0,26551629 |
| Fos     | PVN | dams  | Neo- Arc KO | 5  | 5  | 0 | -9,8034293 | 0,56869532 |
| Fos     | PVN | dams  | WT          | 7  | 7  | 0 | -9,4026841 | 0,66934931 |
| Fos     | PVN | naive | Neo+ Arc KO | 14 | 8  | 6 | -3,9268393 | 1,87438764 |
| Fos     | PVN | naive | WT          | 13 | 8  | 5 | -4,9735965 | 1,00695579 |
| Fos     | SON | dams  | Neo+ Arc KO | 6  | 6  | 0 | -8,7229723 | 0,16633043 |
| Fos     | SON | dams  | Neo- Arc KO | 8  | 8  | 0 | -9,1551794 | 0,90589787 |
| Fos     | SON | dams  | WT          | 7  | 7  | 0 | -9,2343129 | 0,77981416 |
| Fos     | SON | naive | Neo+ Arc KO | 13 | 7  | 6 | -5,5409401 | 1,7322835  |
| Fos     | SON | naive | WT          | 13 | 8  | 5 | -6,3558667 | 0,90213751 |
| Foxp1   | CPU | dams  | Neo+ Arc KO | 5  | 5  | 0 | -4,8628995 | 0,32466067 |
| Foxp1   | CPU | dams  | Neo- Arc KO | 7  | 7  | 0 | -5,0404725 | 0,20542957 |
| Foxp1   | CPU | dams  | WT          | 8  | 8  | 0 | -4,8451798 | 0,40381764 |
| Foxp1   | CPU | naive | Neo+ Arc KO | 14 | 8  | 6 | -3,8760126 | 0,72733653 |
| Foxp1   | CPU | naive | WT          | 13 | 8  | 5 | -4,1024409 | 0,33236968 |
| Foxp1   | NAC | dams  | Neo+ Arc KO | 5  | 5  | 0 | -5,4751844 | 0,29736587 |
| Foxp1   | NAC | dams  | Neo- Arc KO | 8  | 8  | 0 | -5,7974927 | 0,22843197 |
| Foxp1   | NAC | dams  | WT          | 9  | 9  | 0 | -5,6502754 | 0,28324505 |
| Foxp1   | NAC | naive | Neo+ Arc KO | 13 | 7  | 6 | -5,3567727 | 0,67164785 |
| Foxp1   | NAC | naive | WT          | 13 | 8  | 5 | -5,4846462 | 0,31007817 |
| Foxp1   | PFC | dams  | Neo+ Arc KO | 6  | 6  | 0 | -7,2754381 | 0,37206762 |
| Foxp1   | PFC | dams  | Neo- Arc KO | 7  | 7  | 0 | -7,065895  | 0,29344125 |
| Foxp1   | PFC | dams  | WT          | 9  | 9  | 0 | -6,8394586 | 0,47608727 |
| Foxp1   | PFC | naive | Neo+ Arc KO | 13 | 7  | 6 | -6,0285893 | 1,72944442 |
| Foxp1   | PFC | naive | WT          | 10 | 5  | 5 | -6,8664366 | 0,53664902 |
| Gal     | CPU | dams  | Neo+ Arc KO | 3  | 3  | 0 | -13,232943 | 1,29467933 |
| Gal     | CPU | dams  | Neo- Arc KO | 7  | 7  | 0 | -13,344635 | 0,79592883 |
| Gal     | CPU | dams  | WT          | 9  | 9  | 0 | -12,925295 | 1,01434119 |
| Gal     | CPU | naive | Neo+ Arc KO | 13 | 7  | 6 | -10,620854 | 2,4334399  |
| Gal     | CPU | naive | WT          | 13 | 8  | 5 | -10,153908 | 3,65784913 |
| Gal     | NAC | dams  | Neo+ Arc KO | 6  | 6  | 0 | -11,223476 | 2,30505864 |
| Gal     | NAC | dams  | Neo- Arc KO | 8  | 8  | 0 | -11,585157 | 0,81947217 |
| Gal     | NAC | dams  | WT          | 9  | 9  | 0 | -10,503259 | 1,71047667 |
| Gal     | NAC | naive | Neo+ Arc KO | 13 | 7  | 6 | -10,025153 | 2,148622   |
| Gal     | NAC | naive | WT          | 13 | 8  | 5 | -10,306782 | 1,4121385  |
| Gal     | PVN | dams  | Neo+ Arc KO | 6  | 6  | 0 | -7,2647193 | 1,16555039 |
| Gal     | PVN | dams  | Neo- Arc KO | 7  | 7  | 0 | -2,2042408 | 0,85738229 |
| Gal     | PVN | dams  | WT          | 8  | 8  | 0 | -4,1786174 | 2,96556019 |
| Gal     | PVN | naive | Neo+ Arc KO | 14 | 8  | 6 | -4,8136502 | 1,31827184 |
| Gal     | PVN | naive | WT          | 13 | 8  | 5 | -4,8807411 | 1,7171107  |
| Gal     | SON | dams  | Neo+ Arc KO | 6  | 6  | 0 | -8,4731276 | 0,3760576  |
| Gal     | SON | dams  | Neo- Arc KO | 7  | 7  | 0 | -8,8957682 | 1,58963846 |
| Gal     | SON | dams  | WT          | 8  | 8  | 0 | -8,4975312 | 1,01961013 |
| Gal     | SON | naive | Neo+ Arc KO | 13 | 7  | 6 | -5,4405301 | 3,23030902 |
| Gal     | SON | naive | WT          | 13 | 8  | 5 | -7,5893883 | 1,34783158 |
| Homer1a | CPU | dams  | Neo+ Arc KO | 5  | 5  | 0 | -5,7000532 | 0,3838561  |
| Homer1a | CPU | dams  | Neo- Arc KO | 7  | 7  | 0 | -5,6816521 | 0,38052076 |
| Homer1a | CPU | dams  | WT          | 8  | 8  | 0 | -5,952536  | 0,52782381 |
| Homer1a | CPU | naive | Neo+ Arc KO | 14 | 8  | 6 | -4,7855297 | 0,52597004 |
| Homer1a | CPU | naive | WT          | 13 | 8  | 5 | -4,3178196 | 0,42912706 |
| Homer1a | NAC | dams  | Neo+ Arc KO | 5  | 5  | 0 | -6,4736264 | 0,26124845 |
| Homer1a | NAC | dams  | Neo- Arc KO | 7  | 7  | 0 | -6,9094074 | 0,73296794 |
| Homer1a | NAC | dams  | WT          | 10 | 10 | 0 | -6,7475711 | 0,64968963 |
| Homer1a | NAC | naive | Neo+ Arc KO | 13 | 7  | 6 | -5,731337  | 0,56065534 |
| Homer1a | NAC | naive | WT          | 13 | 8  | 5 | -6,1569781 | 0,42703751 |
| Homer1a | PFC | dams  | Neo+ Arc KO | 6  | 6  | 0 | -6,7775348 | 0,64995391 |
| Homer1a | PFC | dams  | Neo- Arc KO | 8  | 8  | 0 | -8,6942238 | 0,57694931 |
| Homer1a | PFC | dams  | WT          | 9  | 9  | 0 | -7,7270155 | 0,90456193 |
| Homer1a | PFC | naive | Neo+ Arc KO | 13 | 7  | 6 | -4,3155767 | 1,1674295  |
| Homer1a | PFC | naive | WT          | 10 | 5  | 5 | -5,3040898 | 0,73993092 |
| Homer1a | PVN | dams  | Neo+ Arc KO | 6  | 6  | 0 | -9,2670816 | 0,24221423 |
| Homer1a | PVN | dams  | Neo- Arc KO | 6  | 6  | 0 | -8,644378  | 0,43039593 |
| Homer1a | PVN | dams  | WT          | 8  | 8  | 0 | -9,0349538 | 0,28529958 |
| Homer1a | PVN | naive | Neo+ Arc KO | 14 | 8  | 6 | -4,4868893 | 1,92974212 |

|         |     |       |            |    |    |   |            |            |
|---------|-----|-------|------------|----|----|---|------------|------------|
| Homer1a | PVN | naive | WT         | 13 | 8  | 5 | -5,3637846 | 1,59239201 |
| Homer1a | SON | dams  | Neo+Arc KO | 6  | 6  | 0 | -8,7519731 | 0,30541682 |
| Homer1a | SON | dams  | Neo-Arc KO | 8  | 8  | 0 | -7,4888121 | 0,548243   |
| Homer1a | SON | dams  | WT         | 8  | 8  | 0 | -7,8973682 | 0,87357386 |
| Homer1a | SON | naive | Neo+Arc KO | 13 | 7  | 6 | -6,0672627 | 1,39142242 |
| Homer1a | SON | naive | WT         | 13 | 8  | 5 | -7,2321905 | 0,92682592 |
| Oxt     | CPU | dams  | Neo+Arc KO | 4  | 4  | 0 | -7,4692601 | 0,70434055 |
| Oxt     | CPU | dams  | Neo-Arc KO | 7  | 7  | 0 | -7,5129966 | 0,5183049  |
| Oxt     | CPU | dams  | WT         | 9  | 9  | 0 | -7,5397751 | 0,72065568 |
| Oxt     | CPU | naive | Neo+Arc KO | 14 | 8  | 6 | -6,5416905 | 2,79685246 |
| Oxt     | CPU | naive | WT         | 13 | 8  | 5 | -7,5064923 | 1,51274927 |
| Oxt     | NAC | dams  | Neo+Arc KO | 5  | 5  | 0 | -6,6400691 | 1,52789111 |
| Oxt     | NAC | dams  | Neo-Arc KO | 8  | 8  | 0 | -8,6328262 | 1,21424903 |
| Oxt     | NAC | dams  | WT         | 10 | 10 | 0 | -8,055979  | 1,28055553 |
| Oxt     | NAC | naive | Neo+Arc KO | 13 | 7  | 6 | -7,5904452 | 2,49141749 |
| Oxt     | NAC | naive | WT         | 13 | 8  | 5 | -7,4992065 | 1,40718048 |
| Oxt     | PFC | dams  | Neo+Arc KO | 5  | 5  | 0 | -8,3789917 | 1,32813957 |
| Oxt     | PFC | dams  | Neo-Arc KO | 8  | 8  | 0 | -7,480858  | 0,53130304 |
| Oxt     | PFC | dams  | WT         | 8  | 8  | 0 | -7,8895256 | 1,15488698 |
| Oxt     | PFC | naive | Neo+Arc KO | 13 | 7  | 6 | -5,0039506 | 4,23317646 |
| Oxt     | PFC | naive | WT         | 10 | 5  | 5 | -6,8532388 | 2,53257507 |
| Oxt     | PVN | dams  | Neo+Arc KO | 6  | 6  | 0 | -1,7301605 | 0,61447183 |
| Oxt     | PVN | dams  | Neo-Arc KO | 7  | 7  | 0 | 1,26879641 | 0,63412391 |
| Oxt     | PVN | dams  | WT         | 8  | 8  | 0 | -0,0905661 | 2,3592462  |
| Oxt     | PVN | naive | Neo+Arc KO | 14 | 8  | 6 | 0,79575591 | 1,06435022 |
| Oxt     | PVN | naive | WT         | 13 | 8  | 5 | 0,40319247 | 1,12141106 |
| Oxt     | SON | dams  | Neo+Arc KO | 6  | 6  | 0 | -4,0192874 | 1,52493774 |
| Oxt     | SON | dams  | Neo-Arc KO | 7  | 7  | 0 | -4,4841778 | 3,03330585 |
| Oxt     | SON | dams  | WT         | 8  | 8  | 0 | -5,0267502 | 1,92056433 |
| Oxt     | SON | naive | Neo+Arc KO | 13 | 7  | 6 | -2,637814  | 3,01399324 |
| Oxt     | SON | naive | WT         | 13 | 8  | 5 | -3,9270084 | 2,63748412 |
| Oxtr    | CPU | dams  | Neo+Arc KO | 4  | 4  | 0 | -8,2825512 | 1,74610185 |
| Oxtr    | CPU | dams  | Neo-Arc KO | 7  | 7  | 0 | -7,9329081 | 0,77256359 |
| Oxtr    | CPU | dams  | WT         | 9  | 9  | 0 | -7,6547974 | 0,99851111 |
| Oxtr    | CPU | naive | Neo+Arc KO | 14 | 8  | 6 | -5,7327587 | 3,07229164 |
| Oxtr    | CPU | naive | WT         | 13 | 8  | 5 | -7,7870226 | 2,21208252 |
| Oxtr    | NAC | dams  | Neo+Arc KO | 6  | 6  | 0 | -6,433319  | 1,09687908 |
| Oxtr    | NAC | dams  | Neo-Arc KO | 8  | 8  | 0 | -8,3739547 | 0,64772827 |
| Oxtr    | NAC | dams  | WT         | 9  | 9  | 0 | -8,0200012 | 1,27069506 |
| Oxtr    | NAC | naive | Neo+Arc KO | 13 | 7  | 6 | -6,120188  | 2,83950284 |
| Oxtr    | NAC | naive | WT         | 13 | 8  | 5 | -6,0432848 | 2,83122637 |
| Oxtr    | PFC | dams  | Neo+Arc KO | 6  | 6  | 0 | -9,0460243 | 0,67945224 |
| Oxtr    | PFC | dams  | Neo-Arc KO | 8  | 8  | 0 | -6,7294499 | 0,27469091 |
| Oxtr    | PFC | dams  | WT         | 9  | 9  | 0 | -7,3196782 | 0,68078239 |
| Oxtr    | PFC | naive | Neo+Arc KO | 13 | 7  | 6 | -4,6085918 | 3,87849433 |
| Oxtr    | PFC | naive | WT         | 10 | 5  | 5 | -7,1456074 | 1,61167262 |
| Oxtr    | PVN | dams  | Neo+Arc KO | 5  | 5  | 0 | -10,130111 | 0,36513476 |
| Oxtr    | PVN | dams  | Neo-Arc KO | 7  | 7  | 0 | -8,053941  | 0,42250825 |
| Oxtr    | PVN | dams  | WT         | 8  | 8  | 0 | -8,4666257 | 1,21524214 |
| Oxtr    | PVN | naive | Neo+Arc KO | 14 | 8  | 6 | -1,8296123 | 2,37867369 |
| Oxtr    | PVN | naive | WT         | 13 | 8  | 5 | -3,9852173 | 2,63225821 |
| Oxtr    | SON | dams  | Neo+Arc KO | 6  | 6  | 0 | -9,1106566 | 1,10447821 |
| Oxtr    | SON | dams  | Neo-Arc KO | 8  | 8  | 0 | -7,2800167 | 0,4098787  |
| Oxtr    | SON | dams  | WT         | 8  | 8  | 0 | -8,2170164 | 0,9653421  |
| Oxtr    | SON | naive | Neo+Arc KO | 13 | 7  | 6 | -4,1649561 | 3,36214835 |
| Oxtr    | SON | naive | WT         | 13 | 8  | 5 | -5,6932294 | 2,05404762 |
| Shank3  | CPU | dams  | Neo+Arc KO | 5  | 5  | 0 | -3,2800856 | 0,18449238 |
| Shank3  | CPU | dams  | Neo-Arc KO | 7  | 7  | 0 | -3,104177  | 0,37499371 |
| Shank3  | CPU | dams  | WT         | 8  | 8  | 0 | -2,9115396 | 0,44150473 |
| Shank3  | CPU | naive | Neo+Arc KO | 14 | 8  | 6 | -2,6494257 | 0,50867547 |
| Shank3  | CPU | naive | WT         | 13 | 8  | 5 | -2,4147698 | 0,3139888  |
| Shank3  | NAC | dams  | Neo+Arc KO | 6  | 6  | 0 | -3,8505214 | 0,20315787 |
| Shank3  | NAC | dams  | Neo-Arc KO | 7  | 7  | 0 | -3,4092913 | 0,19096008 |
| Shank3  | NAC | dams  | WT         | 10 | 10 | 0 | -3,4379915 | 0,24310901 |
| Shank3  | NAC | naive | Neo+Arc KO | 13 | 7  | 6 | -3,4367832 | 0,29852321 |
| Shank3  | NAC | naive | WT         | 13 | 8  | 5 | -3,4088758 | 0,32511257 |
| Shank3  | PFC | dams  | Neo+Arc KO | 6  | 6  | 0 | -4,16509   | 0,39073504 |
| Shank3  | PFC | dams  | Neo-Arc KO | 8  | 8  | 0 | -4,3990954 | 0,23794146 |
| Shank3  | PFC | dams  | WT         | 7  | 7  | 0 | -4,3987431 | 0,15027721 |
| Shank3  | PFC | naive | Neo+Arc KO | 13 | 7  | 6 | -3,3230187 | 0,91819765 |
| Shank3  | PFC | naive | WT         | 10 | 5  | 5 | -3,9154183 | 0,5269285  |
| Shank3  | PVN | dams  | Neo+Arc KO | 5  | 5  | 0 | -4,5300054 | 0,19152315 |
| Shank3  | PVN | dams  | Neo-Arc KO | 7  | 7  | 0 | -4,6082618 | 0,28136207 |
| Shank3  | PVN | dams  | WT         | 8  | 8  | 0 | -4,7335938 | 0,15398088 |
| Shank3  | PVN | naive | Neo+Arc KO | 14 | 8  | 6 | -5,1493724 | 0,80795964 |
| Shank3  | PVN | naive | WT         | 13 | 8  | 5 | -4,7950403 | 0,28607794 |
| Shank3  | SON | dams  | Neo+Arc KO | 6  | 6  | 0 | -5,1092291 | 0,1322453  |
| Shank3  | SON | dams  | Neo-Arc KO | 8  | 8  | 0 | -4,1191803 | 0,27592264 |
| Shank3  | SON | dams  | WT         | 8  | 8  | 0 | -4,4513586 | 0,42595823 |
| Shank3  | SON | naive | Neo+Arc KO | 13 | 7  | 6 | -4,5235792 | 0,37200809 |
| Shank3  | SON | naive | WT         | 13 | 8  | 5 | -4,6179631 | 0,34517717 |

| structure | var_s5  | .y.      | condition | group1      | group2 | n1 | n2 | statistic  | p          | p.adj      | p.adj.signif |
|-----------|---------|----------|-----------|-------------|--------|----|----|------------|------------|------------|--------------|
| CPU       | Avp     | value_s4 | dams      | Neo+ Arc KO | WT     | 6  | 9  | 3,01930547 | 0,00253355 | 0,00760065 | **           |
| PVN       | Cck     | value_s4 | dams      | Neo+ Arc KO | WT     | 5  | 8  | -2,5647226 | 0,01032583 | 0,02065166 | *            |
| PVN       | Cntnap2 | value_s4 | dams      | Neo- Arc KO | WT     | 7  | 8  | -2,7080642 | 0,00676769 | 0,01353539 | *            |
| PVN       | Cpeb4   | value_s4 | dams      | Neo- Arc KO | WT     | 7  | 8  | -2,7414284 | 0,00611727 | 0,01223454 | *            |
| NAC       | Fos     | value_s4 | dams      | Neo+ Arc KO | WT     | 6  | 10 | -2,7568702 | 0,00583575 | 0,01750725 | *            |
| PVN       | Fos     | value_s4 | dams      | Neo+ Arc KO | WT     | 6  | 7  | -2,2526181 | 0,02428324 | 0,04856648 | *            |
| NAC       | Oxtr    | value_s4 | dams      | Neo+ Arc KO | WT     | 6  | 9  | -2,3157203 | 0,02057355 | 0,04114709 | *            |
| PFC       | Oxtr    | value_s4 | dams      | Neo+ Arc KO | WT     | 6  | 9  | 2,39342901 | 0,01669171 | 0,03338342 | *            |
| PVN       | Oxtr    | value_s4 | dams      | Neo+ Arc KO | WT     | 5  | 8  | 2,63884757 | 0,00831884 | 0,01761918 | *            |
| NAC       | Shank3  | value_s4 | dams      | Neo+ Arc KO | WT     | 6  | 10 | 2,61726777 | 0,00886368 | 0,01772736 | *            |
| SON       | Shank3  | value_s4 | dams      | Neo+ Arc KO | WT     | 6  | 8  | 2,55446045 | 0,01063525 | 0,0212705  | *            |
| SON       | Homer1a | value_s4 | naive     | Neo+ Arc KO | WT     | 13 | 13 | -2,025641  | 0,04280158 | 0,04280158 | *            |
| PFC       | Oxtr    | value_s4 | naive     | Neo+ Arc KO | WT     | 13 | 10 | -1,9845558 | 0,04719392 | 0,04719392 | *            |
| PVN       | Oxtr    | value_s4 | naive     | Neo+ Arc KO | WT     | 14 | 13 | -2,0380987 | 0,04154007 | 0,04154007 | *            |

**Table S6. List of all primers used for genotyping and qPCR**

| ID              | accession ID | gene                                                  | forward                    | Reverse                | cDNA tissue             | R square | average Ct |
|-----------------|--------------|-------------------------------------------------------|----------------------------|------------------------|-------------------------|----------|------------|
| <i>Oxt</i>      | NM_011025    | oxytocin                                              | ACCATCACCTACAGCGGATCT      | CCGAGGTCTCAGAGCCAGTAAG | olfactory bulb          | 0,998    | 29,0       |
| <i>Oxtr</i>     | NM_001081147 | oxytocin receptor                                     | CTTAGGGCCAAAAGGTGTCA       | GCAGGTTTCTATGCCCTCTG   | olfactory bulb          | 0,892    | 27,3       |
| <i>Avp</i>      | NM_009732    | Arginine vasopressine                                 | ACACTACGCTCTCCGCTTGT       | CACTGTCTCAGTCCATGTCA   | olfactory bulb          | 0,986    | 30,2       |
| <i>Avpr1a 2</i> | NM_016847.2  | Arginine vasopressine receptor 1A                     | CCTCTGTCTGGACACCTTTCTT     | AAGGGTTTTCGGAATCGGTCC  | olfactory bulb          | 0,902    | 31,6       |
| <i>Homer1a</i>  | NM_011982.4  | homer scaffolding protein 1 transcript variant S      | TGAAAAATCTCAGGTCTCAGACTCCT | GCTCAATGCTCCTTTTTCCACA | olfactory bulb          | 0,994    | 24,5       |
| <i>Fos</i>      | NM_010234    | FBJ osteosarcoma oncogene                             | GAAGGGAAACGGAATAAGATG      | CATCTTCAAGTTGATCTGTCTC | olfactory bulb          | 0,972    | 24,3       |
| <i>Egr1</i>     | NM_007913    | early growth response 1                               | CCACTGACCAAGAGTCCCTT       | CGCCAGTATAGGTGATGGG    | olfactory bulb          | 0,970    | 20,1       |
| <i>Foxp1</i>    | NM_053202    | forkhead box P1                                       | CCACTGTAACCTGAAGCGGT       | GCGGCAGCACAGATACAAAG   | olfactory bulb          | 0,992    | 25,5       |
| <i>Shank3</i>   | NM_021423    | SH3/ankyrin domain gene 3                             | CTCACCACAGAGAGGATCA        | AGCGGAACCTGACCTGTAAG   | olfactory bulb          | 0,969    | 22,3       |
| <i>Fmr1</i>     | NM_008031    | fragile X messenger ribonucleoprotein 1               | CCACGTAATCCAAGAGAGGCT      | TTACGATCTTACCCTGCGG    | olfactory bulb          | 0,961    | 23,5       |
| <i>Cpeb4</i>    | NM_026252    | cytoplasmic polyadenylation element binding protein 4 | AGAAGGGAACTTTATTTAAGTGCG   | ACTACAACCTCCCATACACA   | olfactory bulb          | 0,943    | 21,8       |
| <i>Cntnap2</i>  | NM_001004357 | contactin associated protein-like 2                   | GTCTTCAGCCACTGACCCCTT      | TATAGCTTGGCCTTGTCTGG   | olfactory bulb          | 0,999    | 22,4       |
| <i>Cck</i>      | NM_001284508 | cholecystokinin                                       | TCCCATCCAAAGCCATGAA        | AGCTTCTGCAGGGACTACCG   | olfactory bulb          | 0,981    | 24,1       |
| <i>Gal</i>      | NM_010253.4  | galanin and GMAP prepropeptide                        | TAGGCTGGCTCTGTGGTT         | TCTTCTCTTTGACGGCATC    | paraventricular nucleus | 0,997    | 29,7       |
| <i>Cartpt</i>   | NM_013732    | CART prepropeptide                                    | AAGAAGTACGGCCAAAGTCCC      | CAGTCAACAGCTTCCCGAT    | Striatum                | 0,995    | 25,8       |
| <i>Esr1</i>     | NM_007956.5  | estrogen receptor 1 alpha                             | AAGAGAGTGCAGGCTTTGG        | CGCCAGACGACCAATCAT     | paraventricular nucleus | 0,963    | 32,1       |
| <i>Gapdh</i>    | NM_008084    | glyceraldehyde-3-phosphate dehydrogenase              | ATGGCCCTCCGTGTCTCTAC       | TCAGATGCCTGCTTACCAC    | olfactory bulb          | 0,974    | 17,1       |

| Primer                | Short name    | Full name                         | 5'->3' sequence          | source                    |
|-----------------------|---------------|-----------------------------------|--------------------------|---------------------------|
| for genotyping        | <b>Rg Mut</b> | Arc Mutant Reverse 15020 (Jax)    | CTGAACTTGTGGCCGTTTAC     | Jackson Laboratory        |
| for genotyping        | <b>Fg com</b> | Arc Common 25422 (Jax)            | CACCGACGACCAGATGGAG      | Jackson Laboratory        |
| for genotyping        | <b>Rg WT</b>  | Arc Wild type Reverse 25423 (Jax) | GTGCAACCCTTTCAGCTCTC     | Jackson Laboratory        |
| for Neomycin cassette | <b>Neo3</b>   | Neo3 (Rev)                        | CAAGCTCTTCAGCAATATCACGGG | PMID: 30865697            |
| for Neomycin cassette | <b>Neo4</b>   | Neo4 (Fw)                         | CCTGTCCGGTGCCTGAATGAACT  | PMID: 30865697            |
| for Neomycin cassette | <b>F Neo</b>  | Neomycin For                      | CTTGGGTGGAGAGGCTATTC     | universal from Eurogentec |
| for Neomycin cassette | <b>R Neo</b>  | Neomycin Rev                      | AGGTGAGATGACAGGAGATC     | universal from Eurogentec |
| Other                 | <b>F1</b>     | <b>F1</b> Forward pair 1          | CAGAGCTCAAGCGAGTTCTCC    | design <i>de novo</i>     |
| Other                 | <b>R1</b>     | <b>R1</b> Reverse pair 1          | GGATGTCCCCTGGGTTTTGG     | design <i>de novo</i>     |
| Other                 | <b>F2</b>     | <b>F2</b> Forward pair 2          | GCTCAAGCGAGTTCTCCC       | design <i>de novo</i>     |
| Other                 | <b>R2</b>     | <b>R2</b> Reverse pair 2          | ATCCCCGGAAGTTGAGGTTT     | design <i>de novo</i>     |
| for qPCR              | <b>Fq1</b>    | qPCR Arc-F                        | CCAGGAGAATGACACCAG       | TableS6_qPCR              |
| for qPCR              | <b>Rq1</b>    | qPCR Arc-R                        | TTCAGGAGAAGAGAGGATG      | TableS6_qPCR              |
| for qPCR              | <b>Fq2</b>    | qPCR Arc-F2                       | GAGCTGAAGCCACAAATGCAG    | TableS6_qPCR              |
| for qPCR              | <b>Rq2</b>    | qPCR Arc-R2                       | CACTGGTATGAATCACTGCTGG   | TableS6_qPCR              |

**Table S7. List of genes dysregulated identified by RNA sequencing**

BaseMean are the average number of counts for the 9 animals. Cellular component, Molecular function and Biological process come Gene Ontology (GO) keyword annotations.

| gene          | baseMean    | log2FoldChange | lfcSE       | stat         | pvalue      | padj        | signif           | comparison | database | Cellular Component                               | Molecular function                      | Biological process       |
|---------------|-------------|----------------|-------------|--------------|-------------|-------------|------------------|------------|----------|--------------------------------------------------|-----------------------------------------|--------------------------|
| 9030624G23Rik | 19,17509563 | -4,182074755   | 0,922728131 | -4,532293548 | 5,83467E-06 | 0,006130414 | DOWN in Neo+ KO1 | Neo_Other  |          | nucleus                                          | zinc ion binding                        | regulation of DNA-tem    |
| Acp1          | 1243,518537 | -0,788016903   | 0,13228759  | -5,956846778 | 2,57151E-09 | 5,40371E-06 | DOWN in Neo+ KO1 | Neo_Other  |          | Cytoplasm                                        | Hydrolase, Protein phosphatase          |                          |
| Arc           | 315,6778798 | -2,223771845   | 0,341858424 | -6,50494967  | 7,77194E-11 | 2,61308E-07 | DOWN in Neo+ KO1 | Neo_Other  |          | Cell membrane, C                                 | Developmental pr                        | Endocytosis, Transpor    |
| Arhgap33os    | 14,72721739 | -4,649312363   | 1,060948006 | -4,382224519 | 1,17474E-05 | 0,010971387 | DOWN in Neo+ KO1 | Neo_Other  |          | intercellular bridg                              | ATP binding, prot                       | attachment of spindle    |
| Atp6v0c-ps2   | 3896,130303 | -6,563871963   | 0,905178112 | -7,251470046 | 4,12272E-13 | 2,31024E-09 | DOWN in Neo+ KO1 | Neo_Other  |          | Membrane                                         |                                         |                          |
| Catspere1     | 45,7170293  | -8,708531606   | 1,219341525 | -7,141995433 | 9,19857E-13 | 3,86593E-09 | DOWN in Neo+ KO1 | Neo_Other  |          | CatSper complex, Cell membrane, Ce               | flagellated sperm moti                  |                          |
| Catspere2     | 123,973267  | -2,126093519   | 0,489790855 | -4,340819142 | 1,41953E-05 | 0,01255981  | DOWN in Neo+ KO1 | Neo_Other  |          | CatSper complex                                  | flagellated sperm moti                  |                          |
| Col6a1        | 572,8085316 | 1,794438227    | 0,381833588 | 4,699529546  | 2,60761E-06 | 0,003131187 | UP in Neo+ KO1   | Neo_Other  |          | Extracellular matr                               | collagen binding, Cell adhesion         |                          |
| Crym          | 254,3301245 | 3,503636726    | 0,870615374 | 4,024322142  | 5,71397E-05 | 0,04002395  | UP in Neo+ KO1   | Neo_Other  |          | Cytoplasm                                        | Oxidoreductase                          |                          |
| Fcrls         | 137,3334563 | -1,536971439   | 0,124987678 | -6,053458471 | 1,41769E-09 | 3,40467E-06 | UP in Neo+ KO1   | Neo_Other  | sdbz.org | Cell membrane, m                                 | transmembrane si                        | cell surface receptor si |
| Gm33887       | 463,9358063 | -1,061706506   | 0,182091259 | -5,83062862  | 5,5219E-09  | 1,03143E-05 | DOWN in Neo+ KO1 | Neo_Other  |          |                                                  |                                         |                          |
| Hddc3         | 377,0954836 | -2,126093519   | 0,323720773 | -4,913883463 | 8,92898E-07 | 0,001250876 | DOWN in Neo+ KO1 | Neo_Other  |          |                                                  | Hydrolase                               |                          |
| Hmga1b        | 206,4281902 | -4,588394703   | 0,793441971 | -5,7828989   | 7,34242E-09 | 1,23433E-05 | DOWN in Neo+ KO1 | Neo_Other  |          |                                                  | DNA-binding                             | Transcription, Trans     |
| Hspa8         | 43456,47738 | -0,350427463   | 0,082248555 | -4,260591133 | 2,03887E-05 | 0,017137715 | DOWN in Neo+ KO1 | Neo_Other  |          | Cell membrane, C                                 | Chaperone, Hydr                         | Autophagy, mRNA p        |
| Ints7         | 603,220904  | 0,756607717    | 0,124987678 | 6,053458471  | 1,41769E-09 | 3,40467E-06 | UP in Neo+ KO1   | Neo_Other  | sdbz.org | Chromosome, Cytoplasm, Nucleus                   | DNA damage                              |                          |
| lpw           | 17,1102976  | 0,809843989    | 1,052306612 | 7,640210462  | 2,16867E-14 | 1,82288E-10 | UP in Neo+ KO1   | Neo_Other  |          |                                                  |                                         |                          |
| Itga10        | 86,12733971 | -1,302201509   | 0,2914042   | -4,537345407 | 5,69688E-06 | 0,006130414 | DOWN in Neo+ KO1 | Neo_Other  |          | Membrane                                         | Integrin, Recept                        | Cell adhesion            |
| Kcnj10        | 11522,59146 | -0,688001869   | 0,170633018 | -4,032055904 | 5,5291E-05  | 0,04002395  | DOWN in Neo+ KO1 | Neo_Other  |          | Cell membrane, N                                 | ion channel, Volt                       | ion transport, Potass    |
| Phf1          | 967,2598913 | -0,826251608   | 0,174744467 | -4,728342024 | 2,26361E-06 | 0,002927191 | DOWN in Neo+ KO1 | Neo_Other  |          | Endoplasmic reticulum, Golgi apparatus, Membrane |                                         |                          |
| Rpl34         | 2034,259124 | -1,436195426   | 0,25006879  | -5,743201403 | 9,29031E-09 | 1,41981E-05 | DOWN in Neo+ KO1 | Neo_Other  |          | Cytoplasm, Endor                                 | Ribonucleoprotein, Ribosomal protein    |                          |
| Rps15a-ps6    | 202,108115  | -6,117724108   | 0,583223366 | -10,48950448 | 9,65333E-26 | 1,62282E-21 | DOWN in Neo+ KO1 | Neo_Other  |          |                                                  |                                         |                          |
| Sik1          | 1073,003474 | 0,404295222    | 0,09832883  | 4,111665146  | 3,92816E-05 | 0,030016479 | UP in Neo+ KO1   | Neo_Other  |          | Cytoplasm, Nucle                                 | Developmental                           | Biological rhythms, (    |
| Trim34b       | 7,830258282 | -6,136687911   | 1,537249174 | -3,991992981 | 6,55203E-05 | 0,044058479 | DOWN in Neo+ KO1 | Neo_Other  |          | Cytoplasm, Mitoc                                 | Transferase                             | Antiviral defense        |
| Xntrpc        | 11,99084473 | -6,775337055   | 1,606376883 | -4,217775496 | 2,46724E-05 | 0,019750866 | DOWN in Neo+ KO1 | Neo_Other  |          | Membrane, Nucle                                  | Calcium channel, Calcium transport, Ion |                          |
| Zkscan8       | 760,6731644 | 0,840302183    | 0,133102032 | 6,313218296  | 2,73292E-10 | 7,65717E-07 | UP in Neo+ KO1   | Neo_Other  |          | Nucleus                                          | DNA-binding                             | Transcription, Trans     |

| gene    | baseMean  | log2FoldChan | lfcSE     | stat       | pvalue    | padj      | signif                    | comparison |
|---------|-----------|--------------|-----------|------------|-----------|-----------|---------------------------|------------|
| Asap1   | 1519,0988 | -0,6581759   | 0,1438333 | 4,5759632  | 4,74E-06  | 0,0398591 | DOWN in Neo+ KO1/Neo- KO1 | WT_Arc     |
| Gm14430 | 74,128439 | 22,933039    | 3,434745  | -6,6767808 | 2,442E-11 | 4,108E-07 | UP in Neo+ KO1/Neo- KO1   | WT_Arc     |

| gene          | baseMean   | log2FoldChan | lfcSE     | stat       | pvalue    | padj      | signif           | comparison |
|---------------|------------|--------------|-----------|------------|-----------|-----------|------------------|------------|
| 2900052N01Rik | 4715,2835  | 1,5570725    | 0,3454121 | 4,5078696  | 6,548E-06 | 0,0078653 | UP in Neo+ KO1   | WT_Neo+Arc |
| Acp1          | 1243,5185  | -0,7887157   | 0,1638713 | -4,8130203 | 1,487E-06 | 0,0023162 | DOWN in Neo+ KO1 | WT_Neo+Arc |
| Arc           | 315,677788 | -2,5643484   | 0,3382716 | -7,5807372 | 3,436E-14 | 5,778E-10 | DOWN in Neo+ KO1 | WT_Neo+Arc |
| Asap1         | 1519,0988  | -0,780407    | 0,1571374 | -4,9663993 | 6,821E-07 | 0,0012744 | DOWN in Neo+ KO1 | WT_Neo+Arc |
| Atp6v0c-ps2   | 3896,1303  | -6,1460842   | 1,0749308 | -5,7176554 | 1,08E-08  | 3,632E-05 | DOWN in Neo+ KO1 | WT_Neo+Arc |
| Catspere1     | 45,717029  | -8,7585199   | 1,2450101 | -7,0348985 | 1,994E-12 | 1,677E-08 | DOWN in Neo+ KO1 | WT_Neo+Arc |
| Dnah7b        | 270,77584  | -1,4656207   | 0,2761368 | -5,307589  | 1,111E-07 | 0,0003113 | DOWN in Neo- KO1 | WT_Neo-Arc |
| Entpd4        | 60,449028  | -21,182241   | 3,9081329 | -5,4200412 | 5,959E-08 | 0,0001431 | DOWN in Neo+ KO1 | WT_Neo+Arc |
| Erdr1         | 596,5393   | -2,1339684   | 0,2130785 | -10,014939 | 1,31E-23  | 1,907E-19 | DOWN in Neo- KO1 | WT_Neo-Arc |
| Fam205a3      | 28,783757  | 22,158736    | 3,9084178 | 5,6694901  | 1,432E-08 | 4,014E-05 | UP in Neo+ KO1   | WT_Neo+Arc |
| Fam205a3      | 28,783757  | 21,706591    | 3,9097745 | 5,5518781  | 2,826E-08 | 9,505E-05 | UP in Neo- KO1   | WT_Neo-Arc |
| Gm14308       | 67,312356  | -21,721286   | 3,9074932 | -5,55888   | 2,715E-08 | 9,505E-05 | DOWN in Neo- KO1 | WT_Neo-Arc |
| Gm29804       | 27,16289   | -20,216096   | 3,9089622 | -5,1717298 | 2,319E-07 | 0,0005572 | DOWN in Neo- KO1 | WT_Neo-Arc |
| Gm33887       | 463,93581  | -0,9943719   | 0,2188729 | -4,5431477 | 5,542E-06 | 0,0071688 | DOWN in Neo+ KO1 | WT_Neo+Arc |
| Gm5859        | 30,830701  | -20,055239   | 3,9092249 | -5,1302342 | 2,894E-07 | 0,0006083 | DOWN in Neo- KO1 | WT_Neo-Arc |
| Hmga1b        | 206,42819  | -4,3929683   | 0,9539953 | -4,6048112 | 4,128E-06 | 0,0057853 | DOWN in Neo+ KO1 | WT_Neo+Arc |
| Ints7         | 603,2209   | 0,7510136    | 0,1561608 | 4,8092331  | 1,515E-06 | 0,0023162 | UP in Neo+ KO1   | WT_Neo+Arc |
| lpw           | 17,110298  | 8,2111915    | 1,4134649 | 5,8092644  | 6,275E-09 | 2,638E-05 | UP in Neo+ KO1   | WT_Neo+Arc |
| Itga10        | 86,12734   | -1,4369272   | 0,3440925 | -4,1759912 | 2,967E-05 | 0,029348  | DOWN in Neo+ KO1 | WT_Neo+Arc |
| Mid1          | 547,3545   | 0,9787841    | 0,2300388 | 4,2548651  | 2,092E-05 | 0,0219843 | UP in Neo+ KO1   | WT_Neo+Arc |
| Mid1          | 547,3545   | -2,4397037   | 0,244937  | -9,9605343 | 2,268E-23 | 1,907E-19 | DOWN in Neo- KO1 | WT_Neo-Arc |
| Rpl34         | 2034,2591  | -1,2635452   | 0,2896079 | -4,3629512 | 1,283E-05 | 0,0143855 | DOWN in Neo+ KO1 | WT_Neo+Arc |
| Rpl34-ps1     | 778,30958  | -6,8650392   | 1,2007623 | -5,7172343 | 1,083E-08 | 6,069E-05 | DOWN in Neo- KO1 | WT_Neo-Arc |
| Rps15a-ps6    | 202,10812  | -6,0430277   | 0,9433242 | -6,4060988 | 1,493E-10 | 8,368E-07 | DOWN in Neo+ KO1 | WT_Neo+Arc |
| Xntrpc        | 11,990845  | -7,2621194   | 1,7453574 | -4,1608208 | 3,171E-05 | 0,0296247 | DOWN in Neo+ KO1 | WT_Neo+Arc |
| Zkscan8       | 760,67316  | 0,8558435    | 0,1650286 | 5,1860306  | 2,148E-07 | 0,0004516 | UP in Neo+ KO1   | WT_Neo+Arc |

| term_id    | term_name                                                        | source | intersection                                | term_size | query_size | intersection_size | p_value     | precision   | recall      | effective_domain_size | source_order | parents                          |
|------------|------------------------------------------------------------------|--------|---------------------------------------------|-----------|------------|-------------------|-------------|-------------|-------------|-----------------------|--------------|----------------------------------|
| GO:0007229 | integrin-mediated signaling pathway                              | GO:BP  | Lamb1,Igfb8,Igfbp1,Lama1,Igfb5,Igfb7,Igfbp1 | 101       | 34         | 7                 | 1.14853E-07 | 0.205882353 | 0.069306931 | 24936                 | 2644         | GO:00071166                      |
| GO:0002181 | cytoplasmic translation                                          | GO:BP  | Rps15,Rps15,Rps15,Rpl34,Rps2,Rpl23,Rpl11    | 184       | 34         | 7                 | 7.7891E-06  | 0.205882353 | 0.038043478 | 24936                 | 709          | GO:0006412                       |
| GO:0007155 | cell adhesion                                                    | GO:BP  | Col6a1,Lamb1,Igfb8,Igfbp1,Lama1,Igfb5,Col   | 1305      | 34         | 10                | 0.009930888 | 0.294117647 | 0.007662835 | 24936                 | 2585         | GO:0009987                       |
| GO:1901798 | positive regulation of signal transduction by p53 class mediator | GO:BP  | Rps15,Rpl23,Rpl11                           | 30        | 34         | 3                 | 0.01478815  | 0.088235294 | 0.1         | 24936                 | 20309        | GO:0072331,GO:1901796,GO:1902533 |
| GO:0071714 | basement membrane organization                                   | GO:BP  | Col6a1,Lamb1,Lama1                          | 33        | 34         | 3                 | 0.06174617  | 0.088235294 | 0.090990901 | 24936                 | 15734        | GO:0009819                       |
| GO:0110011 | regulation of basement membrane organization                     | GO:BP  | Lamb1,Lama1                                 | 5         | 34         | 2                 | 0.02903019  | 0.058823529 | 0.2         | 24936                 | 18081        | GO:0071711,GO:1903053            |
| GO:0006412 | translation                                                      | GO:BP  | Rps15,Rps15,Rps15,Rpl34,Rps2,Rpl23,Rpl11    | 1678      | 34         | 7                 | 0.048742444 | 0.205882353 | 0.010324484 | 24936                 | 2062         | GO:0009059,GO:0019538,GO:0160307 |
| GO:160307  | protein biosynthetic process                                     | GO:BP  | Rps15,Rps15,Rps15,Rpl34,Rps2,Rpl23,Rpl11    | 678       | 34         | 7                 | 0.048742444 | 0.205882353 | 0.010324484 | 24936                 | 19039        | GO:0009059,GO:0010467,GO:0160307 |
| GO:0098636 | protein complex involved in cell adhesion                        | GO:CC  | Lamb1,Igfb8,Igfbp1,Lama1,Igfb7,Igfbp1       | 53        | 40         | 6                 | 4.44825E-08 | 0.15        | 0.113202547 | 25413                 | 3154         | GO:0032991                       |
| GO:0022626 | cytosolic ribosome                                               | GO:CC  | Rps15,Rps15,Rps15,Rpl34,Rps2,Rpl23,Rpl11    | 113       | 40         | 7                 | 9.36789E-08 | 0.175       | 0.061946903 | 25413                 | 813          | GO:0005829,GO:0005840            |
| GO:0043251 | basement membrane organization                                   | GO:BP  | Col6a1,Lamb1,Lama1                          | 33        | 40         | 3                 | 0.06174617  | 0.088235294 | 0.090990901 | 25413                 | 2038         | GO:0005840,GO:1909094            |
| GO:0008305 | integrin complex                                                 | GO:CC  | Igfb8,Igfbp1,Igfb7,Igfbp1                   | 28        | 40         | 4                 | 2.08781E-05 | 0.1         | 0.142857143 | 25413                 | 489          | GO:0098636,GO:0098802            |
| GO:0005581 | collagen trimer                                                  | GO:CC  | Col6a1,Col9a1,Col4a4,Col6a6,Col9a3          | 84        | 40         | 5                 | 4.18559E-05 | 0.125       | 0.05952381  | 25413                 | 197          | GO:0032991                       |
| GO:0032991 | protein-containing complex                                       | GO:CC  | Col6a1,Lamb1,Hsp98,Atp6v0c,Igfb8,Rps15      | 6617      | 40         | 26                | 5.1496E-05  | 0.65        | 0.003929273 | 25413                 | 1311         | GO:0005575                       |
| GO:0140139 | solid phase of basement membrane                                 | GO:CC  | Lamb1,Lama1,Col4a4                          | 14        | 40         | 3                 | 0.000258804 | 0.075       | 0.214285714 | 25413                 | 3466         | GO:0005604,GO:0030312            |
| GO:0022625 | cytosolic large ribosomal subunit                                | GO:CC  | Rpl5,Rpl34,Rpl23,Rpl11                      | 58        | 40         | 4                 | 0.000418159 | 0.1         | 0.068965517 | 25413                 | 832          | GO:0015934,GO:0022626            |
| GO:0031012 | extracellular matrix                                             | GO:CC  | Col6a1,Lamb1,Lama1,Col9a1,Col4a4,Col6a6     | 249       | 40         | 6                 | 0.000443879 | 0.15        | 0.024096386 | 25413                 | 1000         | GO:0030312                       |
| GO:0036128 | Catsper complex                                                  | GO:CC  | Catsperg1,Catsper2,Catsper1                 | 17        | 40         | 3                 | 0.000481898 | 0.075       | 0.176470588 | 25413                 | 1651         | GO:0005891                       |
| GO:0030312 | external encapsulating structure                                 | GO:CC  | Col6a1,Lamb1,Lama1,Col9a1,Col4a4,Col6a6     | 251       | 40         | 6                 | 0.000504657 | 0.15        | 0.022904382 | 25413                 | 902          | GO:0071344,GO:0110165            |
| GO:0005840 | ribosome                                                         | GO:CC  | Rps15,Rps15,Rps15,Rpl34,Rps2,Rpl23,Rpl11    | 403       | 40         | 7                 | 0.0005662   | 0.175       | 0.017369727 | 25413                 | 376          | GO:0043292                       |
| GO:0005606 | laminin-111 trimer                                               | GO:CC  | Lamb1,Lama1                                 | 3         | 40         | 2                 | 0.001442162 | 0.05        | 0.666666667 | 25413                 | 219          | GO:0043256                       |
| GO:0015471 | vacuolar proton-transferring V-type ATPase complex               | GO:CC  | Atp6v0c,Tmem199,Spar                        | 26        | 40         | 3                 | 0.001824533 | 0.075       | 0.115384615 | 25413                 | 723          | GO:0005774,GO:0033176            |
| GO:0031176 | proton-transferring V-type ATPase complex                        | GO:CC  | Atp6v0c,Tmem199,Spar                        | 28        | 40         | 3                 | 0.002258988 | 0.075       | 0.107142857 | 25413                 | 1362         | GO:0016469,GO:0090533,GO:1904949 |
| GO:0098796 | membrane protein complex                                         | GO:CC  | Atp6v0c,Igfb8,Igfbp1,Catsperg1,Tmem199      | 1194      | 40         | 10                | 0.002345542 | 0.25        | 0.008375209 | 25413                 | 3186         | GO:0016020,GO:0032991            |
| GO:0005604 | basement membrane                                                | GO:CC  | Col6a1,Lamb1,Lama1,Col4a4                   | 92        | 40         | 4                 | 0.002649847 | 0.1         | 0.043478261 | 25413                 | 218          | GO:0030312                       |
| GO:0022627 | cytosolic small ribosomal subunit                                | GO:CC  | Rps15,Rps15,Rps2                            | 37        | 40         | 3                 | 0.005387477 | 0.075       | 0.081081081 | 25413                 | 834          | GO:0015935,GO:0022626            |
| GO:0015934 | large ribosomal subunit                                          | GO:CC  | Rpl5,Rpl34,Rpl23,Rpl11                      | 118       | 40         | 4                 | 0.007066376 | 0.1         | 0.033898305 | 25413                 | 688          | GO:0044391                       |
| GO:0098533 | cation-transferring ATPase complex                               | GO:CC  | Atp6v0c,Tmem199,Spar                        | 43        | 40         | 3                 | 0.008501036 | 0.075       | 0.069797442 | 25413                 | 2775         | GO:0098533                       |
| GO:0098796 | membrane protein complex                                         | GO:CC  | Atp6v0c,Igfb8,Igfbp1,Catsperg1,Tmem199      | 1194      | 40         | 10                | 0.002345542 | 0.25        | 0.008375209 | 25413                 | 3186         | GO:0016020,GO:0032991            |
| GO:0005604 | basement membrane                                                | GO:CC  | Col6a1,Lamb1,Lama1,Col4a4                   | 92        | 40         | 4                 | 0.002649847 | 0.1         | 0.043478261 | 25413                 | 218          | GO:0030312                       |
| GO:0022627 | cytosolic small ribosomal subunit                                | GO:CC  | Rps15,Rps15,Rps2                            | 37        | 40         | 3                 | 0.005387477 | 0.075       | 0.081081081 | 25413                 | 834          | GO:0015935,GO:0022626            |
| GO:0015934 | large ribosomal subunit                                          | GO:CC  | Rpl5,Rpl34,Rpl23,Rpl11                      | 118       | 40         | 4                 | 0.007066376 | 0.1         | 0.033898305 | 25413                 | 688          | GO:0044391                       |
| GO:0098533 | cation-transferring ATPase complex                               | GO:CC  | Atp6v0c,Tmem199,Spar                        | 43        | 40         | 3                 | 0.008501036 | 0.075       | 0.069797442 | 25413                 | 2775         | GO:0098533                       |
| GO:0098796 | membrane protein complex                                         | GO:CC  | Atp6v0c,Igfb8,Igfbp1,Catsperg1,Tmem199      | 1194      | 40         | 10                | 0.002345542 | 0.25        | 0.008375209 | 25413                 | 3186         | GO:0016020,GO:0032991            |
| GO:0005604 | basement membrane                                                | GO:CC  | Col6a1,Lamb1,Lama1,Col4a4                   | 92        | 40         | 4                 | 0.002649847 | 0.1         | 0.043478261 | 25413                 | 218          | GO:0030312                       |
| GO:0022627 | cytosolic small ribosomal subunit                                | GO:CC  | Rps15,Rps15,Rps2                            | 37        | 40         | 3                 | 0.005387477 | 0.075       | 0.081081081 | 25413                 | 834          | GO:0015935,GO:0022626            |
| GO:0015934 | large ribosomal subunit                                          | GO:CC  | Rpl5,Rpl34,Rpl23,Rpl11                      | 118       | 40         | 4                 | 0.007066376 | 0.1         | 0.033898305 | 25413                 | 688          | GO:0044391                       |
| GO:0098533 | cation-transferring ATPase complex                               | GO:CC  | Atp6v0c,Tmem199,Spar                        | 43        | 40         | 3                 | 0.008501036 | 0.075       | 0.069797442 | 25413                 | 2775         | GO:0098533                       |
| GO:0098796 | membrane protein complex                                         | GO:CC  | Atp6v0c,Igfb8,Igfbp1,Catsperg1,Tmem199      | 1194      | 40         | 10                | 0.002345542 | 0.25        | 0.008375209 | 25413                 | 3186         | GO:0016020,GO:0032991            |
| GO:0005604 | basement membrane                                                | GO:CC  | Col6a1,Lamb1,Lama1,Col4a4                   | 92        | 40         | 4                 | 0.002649847 | 0.1         | 0.043478261 | 25413                 | 218          | GO:0030312                       |
| GO:0022627 | cytosolic small ribosomal subunit                                | GO:CC  | Rps15,Rps15,Rps2                            | 37        | 40         | 3                 | 0.005387477 | 0.075       | 0.081081081 | 25413                 | 834          | GO:0015935,GO:0022626            |
| GO:0015934 | large ribosomal subunit                                          | GO:CC  | Rpl5,Rpl34,Rpl23,Rpl11                      | 118       | 40         | 4                 | 0.007066376 | 0.1         | 0.033898305 | 25413                 | 688          | GO:0044391                       |
| GO:0098533 | cation-transferring ATPase complex                               | GO:CC  | Atp6v0c,Tmem199,Spar                        | 43        | 40         | 3                 | 0.008501036 | 0.075       | 0.069797442 | 25413                 | 2775         | GO:0098533                       |
| GO:0098796 | membrane protein complex                                         | GO:CC  | Atp6v0c,Igfb8,Igfbp1,Catsperg1,Tmem199      | 1194      | 40         | 10                | 0.002345542 | 0.25        | 0.008375209 | 25413                 | 3186         | GO:0016020,GO:0032991            |
| GO:0005604 | basement membrane                                                | GO:CC  | Col6a1,Lamb1,Lama1,Col4a4                   | 92        | 40         | 4                 | 0.002649847 | 0.1         | 0.043478261 | 25413                 | 218          | GO:0030312                       |
| GO:0022627 | cytosolic small ribosomal subunit                                | GO:CC  | Rps15,Rps15,Rps2                            | 37        | 40         | 3                 | 0.005387477 | 0.075       | 0.081081081 | 25413                 | 834          | GO:0015935,GO:0022626            |
| GO:0015934 | large ribosomal subunit                                          | GO:CC  | Rpl5,Rpl34,Rpl23,Rpl11                      | 118       | 40         | 4                 | 0.007066376 | 0.1         | 0.033898305 | 25413                 | 688          | GO:0044391                       |
| GO:0098533 | cation-transferring ATPase complex                               | GO:CC  | Atp6v0c,Tmem199,Spar                        | 43        | 40         | 3                 | 0.008501036 | 0.075       | 0.069797442 | 25413                 | 2775         | GO:0098533                       |
| GO:0098796 | membrane protein complex                                         | GO:CC  | Atp6v0c,Igfb8,Igfbp1,Catsperg1,Tmem199      | 1194      | 40         | 10                | 0.002345542 | 0.25        | 0.008375209 | 25413                 | 3186         | GO:0016020,GO:0032991            |
| GO:0005604 | basement membrane                                                | GO:CC  | Col6a1,Lamb1,Lama1,Col4a4                   | 92        | 40         | 4                 | 0.002649847 | 0.1         | 0.043478261 | 25413                 | 218          | GO:0030312                       |
| GO:0022627 | cytosolic small ribosomal subunit                                | GO:CC  | Rps15,Rps15,Rps2                            | 37        | 40         | 3                 | 0.005387477 | 0.075       | 0.081081081 | 25413                 | 834          | GO:0015935,GO:0022626            |
| GO:0015934 | large ribosomal subunit                                          | GO:CC  | Rpl5,Rpl34,Rpl23,Rpl11                      | 118       | 40         | 4                 | 0.007066376 | 0.1         | 0.033898305 | 25413                 | 688          | GO:0044391                       |
| GO:0098533 | cation-transferring ATPase complex                               | GO:CC  | Atp6v0c,Tmem199,Spar                        | 43        | 40         | 3                 | 0.008501036 | 0.075       | 0.069797442 | 25413                 | 2775         | GO:0098533                       |
| GO:0098796 | membrane protein complex                                         | GO:CC  | Atp6v0c,Igfb8,Igfbp1,Catsperg1,Tmem199      | 1194      | 40         | 10                | 0.002345542 | 0.25        | 0.008375209 | 25413                 | 3186         | GO:0016020,GO:0032991            |
| GO:0005604 | basement membrane                                                | GO:CC  | Col6a1,Lamb1,Lama1,Col4a4                   | 92        | 40         | 4                 | 0.002649847 | 0.1         | 0.043478261 | 25413                 | 218          | GO:0030312                       |
| GO:0022627 | cytosolic small ribosomal subunit                                | GO:CC  | Rps15,Rps15,Rps2                            | 37        | 40         | 3                 | 0.005387477 | 0.075       | 0.081081081 | 25413                 | 834          | GO:0015935,GO:0022626            |
| GO:0015934 | large ribosomal subunit                                          | GO:CC  | Rpl5,Rpl34,Rpl23,Rpl11                      | 118       | 40         | 4                 | 0.007066376 | 0.1         | 0.033898305 | 25413                 | 688          | GO:0044391                       |
| GO:0098533 | cation-transferring ATPase complex                               | GO:CC  | Atp6v0c,Tmem199,Spar                        | 43        | 40         | 3                 | 0.008501036 | 0.075       | 0.069797442 | 25413                 | 2775         | GO:0098533                       |
| GO:0098796 | membrane protein complex                                         | GO:CC  | Atp6v0c,Igfb8,Igfbp1,Catsperg1,Tmem199      | 1194      | 40         | 10                | 0.002345542 | 0.25        | 0.008375209 | 25413                 | 3186         | GO:0016020,GO:0032991            |
| GO:0005604 | basement membrane                                                | GO:CC  | Col6a1,Lamb1,Lama1,Col4a4                   | 92        | 40         | 4                 | 0.002649847 | 0.1         | 0.043478261 | 25413                 | 218          | GO:0030312                       |
| GO:0022627 | cytosolic small ribosomal subunit                                | GO:CC  | Rps15,Rps15,Rps2                            | 37        | 40         | 3                 | 0.005387477 | 0.075       | 0.081081081 | 25413                 | 834          | GO:0015935,GO:0022626            |
| GO:0015934 | large ribosomal subunit                                          | GO:CC  | Rpl5,Rpl34,Rpl23,Rpl11                      | 118       | 40         | 4                 | 0.007066376 | 0.1         | 0.033898305 | 25413                 | 688          | GO:0044391                       |
| GO:0098533 | cation-transferring ATPase complex                               | GO:CC  | Atp6v0c,Tmem199,Spar                        | 43        | 40         | 3                 | 0.008501036 | 0.075       | 0.069797442 | 25413                 | 2775         | GO:0098533                       |
| GO:0098796 | membrane protein complex                                         | GO:CC  | Atp6v0c,Igfb8,Igfbp1,Catsperg1,Tmem199      | 1194      | 40         | 10                | 0.002345542 | 0.25        | 0.008375209 | 25413                 | 3186         | GO:0016020,GO:0032991            |
| GO:0005604 | basement membrane                                                | GO:CC  | Col6a1,Lamb1,Lama1,Col4a4                   | 92        | 40         | 4                 | 0.002649847 | 0.1         | 0.043478261 | 25413                 | 218          | GO:0030312                       |
| GO:0022627 | cytosolic small ribosomal subunit                                | GO:CC  | Rps15,Rps15,Rps2                            | 37        | 40         | 3                 | 0.005387477 | 0.075       | 0.081081081 | 25413                 | 834          | GO:0015935,GO:0022626            |
| GO:0015934 | large ribosomal subunit                                          | GO:CC  | Rpl5,Rpl34,Rpl23,Rpl11                      | 118       | 40         | 4                 | 0.007066376 | 0.1         | 0.033898305 | 25413                 | 688          | GO:0044391                       |
| GO:0098533 | cation-transferring ATPase complex                               | GO:CC  | Atp6v0c,Tmem199,Spar                        | 43        | 40         | 3                 | 0.008501036 | 0.075       | 0.069797442 | 25413                 | 2775         | GO:0098533                       |
| GO:0098796 | membrane protein complex                                         | GO:CC  | Atp6v0c,Igfb8,Igfbp1,Catsperg1,Tmem199      | 1194      | 40         | 10                | 0.002345542 | 0.25        | 0.008375209 | 25413                 | 3186         | GO:0016020,GO:0032991            |
| GO:0005604 | basement membrane                                                | GO:CC  | Col6a1,Lamb1,Lama1,Col4a4                   | 92        | 40         | 4                 | 0.002649847 | 0.1         | 0.043478261 | 25413                 | 218          | GO:0030312                       |
| GO:0022627 | cytosolic small ribosomal subunit                                | GO:CC  | Rps15,Rps15,Rps2                            | 37        | 40         |                   |             |             |             |                       |              |                                  |

## SUPPLEMENTARY REFERENCES

- 1 Wang KH, Majewska A, Schummers J, Farley B, Hu C, Sur M *et al.* In Vivo Two-Photon Imaging Reveals a Role of Arc in Enhancing Orientation Specificity in Visual Cortex. *Cell* 2006; **126**: 389–402.
- 2 Topilko T, Diaz SL, Pacheco CM, Verny F, Rousseau C V, Kirst C *et al.* Edinger-Westphal peptidergic neurons enable maternal preparatory nesting. *Neuron* 2022; **110**: 1385–1399.
- 3 Gora C, Dudas A, Vaugrente O, Drobecq L, Pecnard E, Lefort G *et al.* Deciphering autism heterogeneity: a molecular stratification approach in four mouse models. *Translational Psychiatry* 2024; **14**: 416.
- 4 Gora C, Dudas A, Court L, Annamneedi A, Lefort G, Nakahara TS *et al.* Effect of the social environment on olfaction and social skills in wild-type and a mouse model of autism. *Translational Psychiatry* 2024; **14**: 464.
- 5 de Chaumont F, Ey E, Torquet N, Lagache T, Dallongeville S, Imbert A *et al.* Real-time analysis of the behaviour of groups of mice via a depth-sensing camera and machine learning. *Nature Biomedical Engineering* 2019; **3**: 930–942.
- 6 Pallé A, Montero M, Fernández S, Tezanos P, de las Heras JA, Luskey V *et al.* Gai2+ vomeronasal neurons govern the initial outcome of an acute social competition. *Scientific Reports* 2020; **10**: 894.
- 7 Tachibana RO, Kanno K, Okabe S, Kobayasi KI, Okanoya K. USVSEG: A robust method for segmentation of ultrasonic vocalizations in rodents. *PLOS ONE* 2020; **15**: e0228907.
- 8 Iezzi D, Caceres-Rodriguez A, Chavis P, Manzoni OJJ. In utero exposure to cannabidiol disrupts select early-life behaviors in a sex-specific manner. *Translational Psychiatry* 2022; **12**: 501.
- 9 Friard O, Gamba M. BORIS: a free, versatile open-source event-logging software for video/audio coding and live observations. *Methods in Ecology and Evolution* 2016; **7**: 1325–1330.
- 10 Dobin A, Davis CA, Schlesinger F, Drenkow J, Zaleski C, Jha S *et al.* STAR: ultrafast universal RNA-seq aligner. *Bioinformatics* 2013; **29**: 15–21.
- 11 Patro R, Duggal G, Love MI, Irizarry RA, Kingsford C. Salmon provides fast and bias-aware quantification of transcript expression. *Nat Methods* 2017; **14**: 417–419.
- 12 Love MI, Huber W, Anders S. Moderated estimation of fold change and dispersion for RNA-seq data with DESeq2. *Genome Biol* 2014; **15**: 550.
- 13 Kolde R. pheatmap: Pretty Heatmaps. 2010; : 1.0.13.

- 14 Kolberg L, Raudvere U, Kuzmin I, Adler P, Vilo J, Peterson H. g:Profiler—interoperable web service for functional enrichment analysis and gene identifier mapping (2023 update). *Nucleic Acids Research* 2023; **51**: W207–W212.
- 15 Szklarczyk D, Kirsch R, Koutrouli M, Nastou K, Mehryary F, Hachilif R *et al.* The STRING database in 2023: protein–protein association networks and functional enrichment analyses for any sequenced genome of interest. *Nucleic Acids Research* 2023; **51**: D638–D646.
- 16 Andrea Franceschini <Andrea.Franceschini@lsb-sib.ch>. STRINGdb. 2017. doi:10.18129/B9.BIOC.STRINGDB.
- 17 Rezwani M, Pourfathollah AA, Noorbakhsh F. rbioapi: user-friendly R interface to biologic web services' API. *Bioinformatics* 2022; **38**: 2952–2953.
- 18 Rezwani M. rbioapi: User-Friendly R Interface to Biologic Web Services' API. 2021; : 0.8.3.
- 19 Yu S, Fu Y, Wong JH-Y, Wang J, Zhao H, Zhao J *et al.* The 3D Genome Browser 2.0: an enhanced online platform for visualizing and analyzing 3D genome architecture. *Nucleic Acids Res* 2026; **54**: D48–D54.
- 20 Schindelin J, Arganda-Carreras I, Frise E, Kaynig V, Longair M, Pietzsch T *et al.* Fiji: an open-source platform for biological-image analysis. *Nature Methods* 2012; **9**: 676–682.
- 21 Bankhead P, Loughrey MB, Fernández JA, Dombrowski Y, McArt DG, Dunne PD *et al.* QuPath: Open source software for digital pathology image analysis. *Scientific Reports* 2017; **7**: 16878.
- 22 Leek JT, Johnson WE, Parker HS, Fertig EJ, Jaffe AE, Zhang Y *et al.* sva: Surrogate Variable Analysis. R package version 3.54.0. 2024. doi:10.18129/B9.bioc.sva.
- 23 Kassambara A. rstatix: Pipe-Friendly Framework for Basic Statistical Tests. 2023.
- 24 Benjamini Y, Hochberg Y. Controlling the False Discovery Rate: A Practical and Powerful Approach to Multiple Testing. *Journal of the Royal Statistical Society: Series B (Methodological)* 1995; **57**: 289–300.
- 25 Kassambara A, Kosinski M, Biecek P. survminer: Drawing Survival Curves using 'ggplot2'. 2024.
- 26 Patil I. Visualizations with statistical details: The 'ggstatsplot' approach. *Journal of Open Source Software* 2021; **6**: 3167.
- 27 Rohart F, Gautier B, Singh A, Lê Cao K-A. mixOmics: An R package for 'omics feature selection and multiple data integration. *PLOS Computational Biology* 2017; **13**: e1005752.
